# Supplementary material for: t BuOK-mediated selective 1,2-silacarboxylation of arylalkenes with Si–B/Si–Si/Si–Li reagents and CO2
Source: Royal Society of Chemistry journal article supplement (doi:10.1039/d4qo02261k), 2025-01-01
Supplement: d4qo02261k1.pdf [file d4qo02261k1.pdf]

## Supporting Information

### **tBuOK-Mediated Selective 1,2-Silylcarboxylation of Arylalkenes with Si-B/Si-Si/Si-Li Reagents and CO<sub>2</sub>**

Liuzhou Gao,<sup>a,b\*</sup> Linghui Meng,<sup>a</sup> Yan Wen,<sup>a</sup> Jingyi Hu,<sup>a</sup> Yuxin Sun,<sup>a</sup> Shenglong Wang,<sup>a</sup> Guoqiang Wang,<sup>b,\*</sup> and Yidong Wang,<sup>a,\*</sup>

<sup>a</sup>School of Chemistry and Chemical Engineering, Yangzhou University, Yangzhou 225002, Jiangsu, P. R. China

<sup>b</sup>State Key Laboratory of Coordination Chemistry, Key Laboratory of Mesoscopic Chemistry of Ministry of Education, Institute of Theoretical and Computational Chemistry, School of Chemistry and Chemical Engineering, Nanjing University, Nanjing 210023, Jiangsu, P. R. China.

Correspondence to: gaoliuzhou@yzu.edu.cn; wangguoqiang710@nju.edu.cn;  
wangyd021@yzu.edu.cn.

---

## Table of Contents

|                                                                                                    |            |
|----------------------------------------------------------------------------------------------------|------------|
| <b>1. General Information .....</b>                                                                | <b>3</b>   |
| <b>2. Experimental Details for the Base-mediated 1,2-Silacarboxylation of Arylalkenes.....</b>     | <b>4</b>   |
| 2.1 Optimization Studies.....                                                                      | 4          |
| 2.2 General Procedure for the 1,2-Silacarboxylation of Arylalkenes .....                           | 6          |
| 2.3 Gram-Scale Experiment .....                                                                    | 8          |
| 2.4 Experimental Studies on the Reaction Mechanism .....                                           | 9          |
| <b>3. Spectroscopic Characterization Data .....</b>                                                | <b>19</b>  |
| <b>4. Computational Investigations .....</b>                                                       | <b>41</b>  |
| 4.1 Computational Details.....                                                                     | 41         |
| 4.2 DFT Calculations on the <sup>t</sup> BuOK-Mediated 1,2-Silylcarboxylation of Arylalkenes ..... | 42         |
| <b>5. NMR Spectra.....</b>                                                                         | <b>47</b>  |
| <b>6. Energies and Cartesian Coordinates of the Optimized Structures.....</b>                      | <b>85</b>  |
| <b>7. References.....</b>                                                                          | <b>127</b> |

---

## 1. General Information

All reactions were carried out with standard Schlenk techniques under argon or in an argon-filled glove-box. The internal H<sub>2</sub>O and O<sub>2</sub> levels were kept at less than 0.1 ppm. PhMe<sub>2</sub>SiBpin was purchased from TCI and Sigma-Aldrich. <sup>t</sup>BuOK was purchased from Sigma-Aldrich and stored in the glove box. Other chemicals purchased from Sigma-Aldrich, J&K, Acros, and Alfa Aesar Chemical Companies were used as received. Anhydrous solvents, such as ethyl acetate (EA), acetonitrile (MeCN), *N,N*-dimethylformamide (DMF), *N,N*-dimethylacetamide (DMAc) and dimethyl sulfoxide (DMSO) were purchased from J&K and used as received (water < 30 ppm, J&K Seal). All other solvents, such as THF, 1,4-dioxane and toluene (PhMe), used were vigorously dried, and stored in the glove box. Analytical thin-layer chromatography (TLC) was performed on silica gel 60 F<sub>254</sub> aluminum sheets from Qingdao Haiyang Chemical Co., Ltd. Flash chromatography was performed on silica gel (200–300 mesh, Qingdao Haiyang Chemical Co., Ltd). <sup>1</sup>H, <sup>13</sup>C, and <sup>19</sup>F NMR spectra were recorded in CDCl<sub>3</sub> on a Bruker AVANCE Avance III 400 instrument. Chemical shifts are reported in parts per million (ppm) and are referenced to the residual solvent resonance as the internal standard (CDCl<sub>3</sub>: 7.26 ppm for <sup>1</sup>H NMR and 77.06 ppm for <sup>13</sup>C{<sup>1</sup>H NMR}). Data are reported as follows: chemical shift (δ ppm), multiplicity (s = singlet, d = doublet, t = triplet, q = quartet, m = multiplet), coupling constants (Hz) and integration. Infrared spectra were recorded on a ThermoFisher Nicolet iS5 FTIR using a neat thin-film technique. High-resolution mass spectra (HRMS) were recorded on the Thermo Quest Finnigan LCQDECA system equipped with an ESI or APCI ionization source and a TOF detector mass spectrometer.

---

## 2. Experimental Details for the Base-mediated 1,2-Silacarboxylation of Arylalkenes

### 2.1 Optimization Studies

**General procedure A.** In an argon-filled glovebox, styrene **1a** (0.2~0.24 mmol, 1.0~1.2 equiv.), PhMe<sub>2</sub>SiBpin **2a** (0.2~0.24 mmol, 1.0~1.2 equiv.), <sup>t</sup>BuOK (0.4~0.48 mmol, 2.0~2.4 equiv.), and solvent (1.0 mL) were added to an oven-dried Scklenk-tube. The reaction tube was sealed, and removed from the glovebox, and the reaction mixture was stirred at room temperature for 30 min. Then, the direct bubbling of dry CO<sub>2</sub> through the reaction mixture, stirred at room temperature for 30 s (or the solution was cooled to -20 °C and then the dried CO<sub>2</sub> was added to the reaction mixture through a balloon. The reaction mixture was stirred at -20 °C for about 2 min). After the reaction finished, 1M HCl solution (~0.5 mL) was added to the reaction mixture, and the organic phase was separated. The aqueous layer was extracted with EtOAc (3×5 mL). Then, the organic layers were combined, dried over anhydrous sodium sulfate, and filtered. After the removal of the solvent under reduced pressure, the crude material was obtained. Further, benzyl ether (39.8 mg, 0.2 mmol, 1.0 equiv.) was added to the crude material, and then an aliquot (approximately 30 μL) of the reaction solution was then directly transferred to an NMR tube and CDCl<sub>3</sub> was added. The yield was determined by <sup>1</sup>H NMR analysis based on the integration of the targeted product and internal standard. The results are tabulated in Table S1.

**Table S1.** Optimization of Reaction Conditions.<sup>a</sup>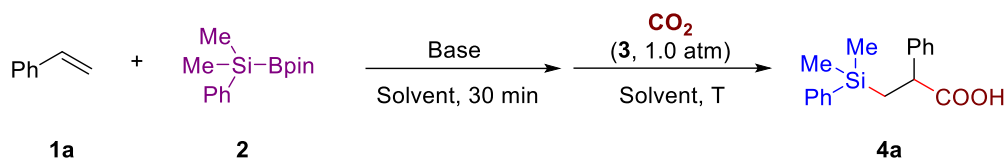

| Entry | <b>1a/2</b> [equiv.] | Solvent            | Base                                      | T (°C)       | Yield <sup>b</sup><br><b>4a</b> |
|-------|----------------------|--------------------|-------------------------------------------|--------------|---------------------------------|
| 1     | 1:1                  | THF                | w/o base                                  | r.t.         | N.D.                            |
| 2     | 1:1                  | THF                | <sup>t</sup> BuOK (1.0 eq.)               | r.t.         | 36%                             |
| 3     | 1:1                  | THF                | MeONa (2.0 eq.)                           | r.t.         | trace                           |
| 4     | 1:1                  | THF                | MeOK (2.0 eq.)                            | r.t.         | trace                           |
| 5     | 1:1                  | THF                | <sup>t</sup> BuONa (2.0 eq.)              | r.t.         | 12%                             |
| 6     | 1:1                  | THF                | <sup>t</sup> BuOLi (2.0 eq.)              | r.t.         | N.D.                            |
| 7     | 1:1                  | THF                | KHMDS (2.0 eq.)                           | r.t.         | trace                           |
| 8     | 1:1                  | THF                | CsF (2.0 eq.)                             | r.t.         | N.D.                            |
| 9     | 1:1                  | THF                | CS <sub>2</sub> CO <sub>3</sub> (2.0 eq.) | r.t.         | trace                           |
| 10    | 1:1.2                | THF                | <sup>t</sup> BuOK (2.0 eq.)               | r.t.         | 68%                             |
| 11    | 1:1.2                | THF                | <sup>t</sup> BuOK (2.4 eq.)               | r.t.         | 76%                             |
| 11    | 1:1.2                | THF                | <sup>t</sup> BuOK (2.4 eq.)               | r.t., -20 °C | 80%(76% <sup>c</sup> )          |
| 12    | 1:1.2                | 1,4-dioxane        | <sup>t</sup> BuOK (2.4 eq.)               | r.t.         | 55%                             |
| 13    | 1:1.2                | PhMe               | <sup>t</sup> BuOK (2.4 eq.)               | r.t.         | trace                           |
| 14    | 1:1.2                | CH <sub>3</sub> CN | <sup>t</sup> BuOK (2.4 eq.)               | r.t.         | N.D.                            |
| 15    | 1:1.2                | DMF                | <sup>t</sup> BuOK (2.4 eq.)               | r.t.         | N.D.                            |
| 16    | 1:1.2                | DMAc               | <sup>t</sup> BuOK (2.4 eq.)               | r.t.         | N.D.                            |
| 17    | 1:1.2                | DMSO               | <sup>t</sup> BuOK (2.4 eq.)               | r.t.         | N.D.                            |

<sup>a</sup>Reaction conditions: styrene **1a** (0.2~0.24 mmol, 1.0~1.2 equiv.), PhMe<sub>2</sub>SiBpin **2** (0.2~0.24 mmol, 1.0~1.2 equiv.), <sup>t</sup>BuOK (0.4~0.48 mmol, 2.0~2.4 equiv.), in dry solvent (1.5 mL), r.t. for 5 min. Then, the direct bubbling of dry CO<sub>2</sub> through the reaction mixture, stirred at room temperature or -20 °C for about 2 min. After the reaction finished, 1M HCl solution (~0.5 mL) was added to the reaction mixture, and the organic phase was separated. <sup>b</sup>Yields were determined by <sup>1</sup>H NMR analysis with benzyl ether as an internal standard. <sup>c</sup>Isolated yield of analytically pure material after purification on preparative thin-layer chromatography.

## 2.2 General Procedure for the 1,2-Silacarboxylation of Arylalkenes

### 2.2.1 Synthetic Procedure for <sup>t</sup>BuOK-Mediated 1,2-Silacarboxylation of Arylalkenes with Si-B

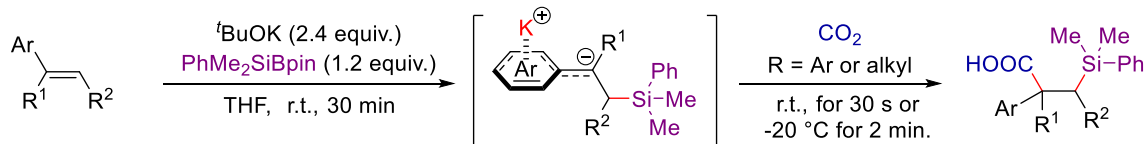

**General Procedure B:** In an argon-filled glovebox, alkene (0.2 mmol, 1.0 equiv.), PhMe<sub>2</sub>SiBpin (0.2~0.24 mmol, 1.0~1.2 equiv.), <sup>t</sup>BuOK (0.4~0.48 mmol, 2.0~2.4 equiv.), and dry THF (1.5 mL) were added to an oven-dried Scklenk-tube. The reaction tube was sealed, and removed from the glovebox, and the reaction mixture was stirred at room temperature for 30 min. Then, the direct bubbling of dry CO<sub>2</sub> through the reaction mixture, stirred at room temperature for 30 s (or stirred at -20 °C for 2 minutes). After the reaction finished, 1M HCl solution (~0.5 mL) was added to the reaction mixture, and the organic phase was separated. The aqueous layer was extracted with EtOAc (3x5 mL). Then, the organic layers were combined, dried over anhydrous sodium sulfate, and filtered. After the removal of the solvent under reduced pressure, the crude material was purified by flash column chromatography on silica gel or preparative TLC to afford the corresponding 1,2-silylcarboxylation products.

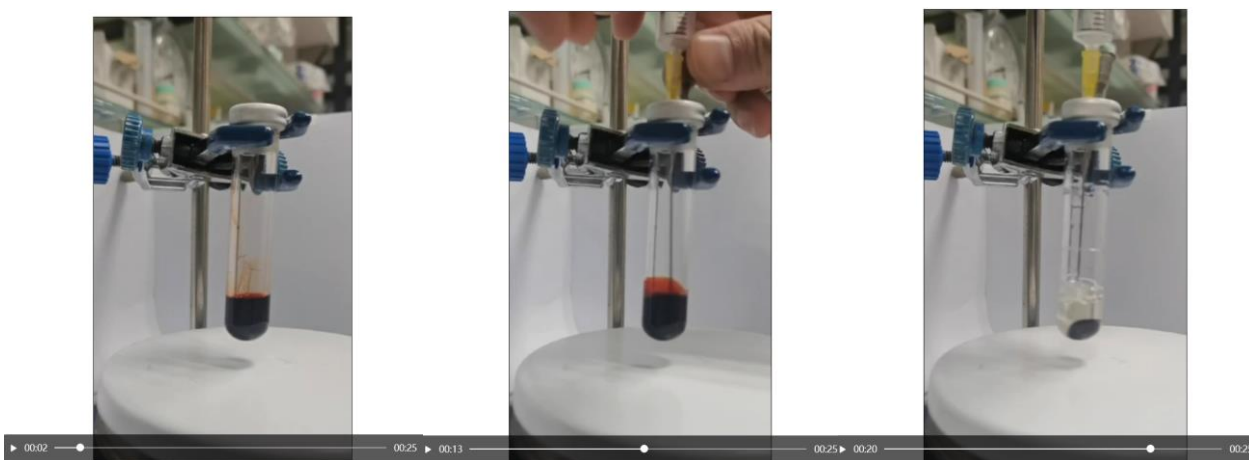

**Figure S1.** The photos for the <sup>t</sup>BuOK-mediated selective 1,2-silacarboxylation of styrene

### 2.2.2 Synthetic Procedure for <sup>t</sup>BuOK-Mediated 1,2-Silacarboxylation of Arylalkenes with Si-Si

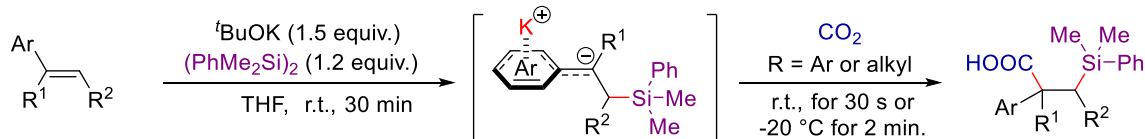

**General Procedure C:** In an argon-filled glovebox, alkene (0.2 mmol, 1.0 equiv.), PhMe<sub>2</sub>Si-SiMe<sub>2</sub>Ph (0.24 mmol, 1.2 equiv.), <sup>t</sup>BuOK (0.3 mmol, 1.5 equiv.), and dry THF (1.5 mL) were added to an oven-

dried Scklenk-tube. The reaction tube was sealed, and removed from the glovebox, and the reaction mixture was stirred at room temperature for 30 min. Then, the direct bubbling of dry CO<sub>2</sub> through the reaction mixture, stirred at -20 °C for about 2 minutes. After the reaction finished, 1M HCl solution (~0.5 mL) was added to the reaction mixture, and the organic phase was separated. The aqueous layer was extracted with EtOAc (3×5 mL). Then, the organic layers were combined, dried over anhydrous sodium sulfate, and filtered. After the removal of the solvent under reduced pressure, the crude material was purified by flash column chromatography on silica gel or preparative TLC to afford the corresponding 1,2-silylcarboxylation products.

### 2.2.1 Synthetic Procedure for <sup>t</sup>BuOK-Mediated 1,2-Silylcarboxylation of Arylalkenes with Si-Li

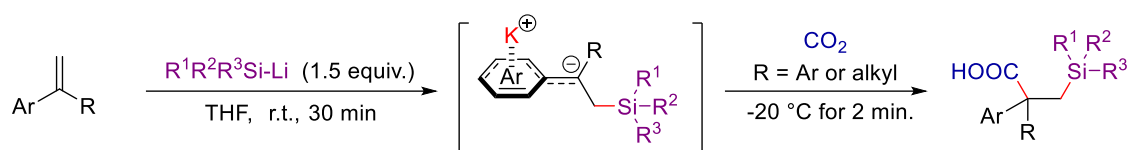

**General Procedure D:** In an argon-filled glovebox, alkene (0.2 mmol, 1.0 equiv.), Si-Li reagent (0.3 mmol, 1.5 equiv.), and dry THF (1.5 mL) were added to an oven-dried Scklenk-tube. The reaction tube was sealed, and removed from the glovebox, and the reaction mixture was stirred at room temperature for 30 min. Then, the direct bubbling of dry CO<sub>2</sub> through the reaction mixture, stirred at -20 °C for about 2 minutes. After the reaction finished, 1M HCl solution (~0.5 mL) was added to the reaction mixture, and the organic phase was separated. The aqueous layer was extracted with EtOAc (3×5 mL). Then, the organic layers were combined, dried over anhydrous sodium sulfate, and filtered. After the removal of the solvent under reduced pressure, the crude material was purified by flash column chromatography on silica gel or preparative TLC to afford the corresponding 1,2-silylcarboxylation products.

### 2.2.2 Unsuccessful Examples

#### Unsuccessful Alkene Examples<sup>a</sup>

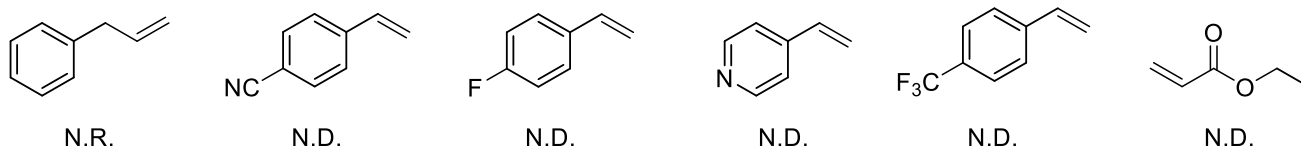

**Figure S2. Unsuccessful examples in the selective 1,2-silylcarboxylation of arylalkenes.** <sup>a</sup>Preformed under the standard conditions with PhMe<sub>2</sub>SiBpin **2a** as the model substrates. N.D.= Not detected.

As shown in Figure S2, our experiments suggested that alkyl alkene (e.g. allylbenzene), 4-cyanostyrene, 4-fluorostyrene, 4-vinylpyridine, 4-(trifluoromethyl)styrene, ethyl acrylate were not suitable substrates under the current reaction conditions. In fact, the presence of electron-withdrawing

groups, such as 4-fluorine, 4-cyano, and 4-ester in the structure of styrene substrates will lead to incompatibility, resulting in either  $\text{S}_{\text{N}}\text{Ar}$  reactions or decomposition prior to conversion to carbon dioxide (the  $\text{S}_{\text{N}}\text{Ar}$  process see our recent work at ref. 17, *Chem. Sci.*, **2023**, *14*, 11881–11889.).

### 2.3 Gram-Scale Experiment

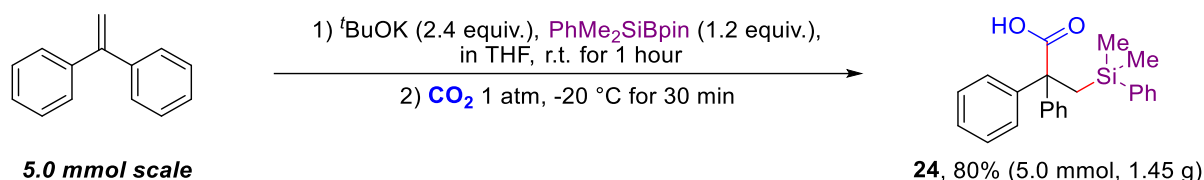

**Synthetic Procedure:** In an argon-filled glove box, an oven-dried 100 mL schlenk-tube was charged with 1,1-diphenylethylene (0.90 g, 5.0 mmol, 1.0 equiv.),  $\text{PhMe}_2\text{SiBpin}$  (1.57 g, 6.0 mmol, 1.2 equiv.),  $t\text{BuOK}$  (1.35 g, 10.0 mmol, 2.4 equiv.), in 25 mL THF. The reaction tube was sealed, and removed from the glovebox, and the reaction mixture was stirred at room temperature for 1 h. Then, the reaction mixture was taken into a  $-20\text{ }^\circ\text{C}$  low-temperature bath, next, the direct bubbling of dry  $\text{CO}_2$  through the reaction mixture, stirred at room temperature for about 30 minutes. After the reaction finished, 1M HCl solution ( $\sim 10.0$  mL) was added to the reaction mixture, and the organic phase was separated. The aqueous layer was extracted with EtOAc ( $4 \times 20$  mL). Then, the organic layers were combined, dried over anhydrous sodium sulfate, and filtered. After the removal of the solvent under reduced pressure, the crude material was purified by flash column chromatography on silica gel (petroleum ether/EtOAc = 50:1 $\rightarrow$ 5:1, v/v) to afford the desired product **4p** as a colorless oil (1.45 g, 80%).

**Product 4p**,  $^1\text{H NMR}$  (400 MHz,  $\text{CDCl}_3$ ):  $\delta$  7.49 – 7.44 (m, 2H), 7.44 – 7.36 (m, 4H), 7.35 – 7.31 (m, 5H), 7.31 – 7.26 (m, 4H), 2.14 (s, 2H), 0.00 (s, 6H) ppm.  $^{13}\text{C}\{^1\text{H}\}$  NMR (100 MHz,  $\text{CDCl}_3$ ):  $\delta$  181.0, 144.6, 139.9, 133.7, 128.8, 128.7, 127.9, 127.6, 126.9, 58.3, 28.4, -2.1 ppm. IR (film): 3208, 3069, 3022, 2952, 1705, 1548, 1428, 1242, 1111, 737, 700  $\text{cm}^{-1}$ . HRMS (ESI): calculated for  $\text{C}_{23}\text{H}_{23}\text{O}_2\text{Si}^-$  [M-H] $^-$ : 359.1473; found 359.1465.



## 2.4 Experimental Studies on the Reaction Mechanism

To further verify the involvement of the silanion intermediates **V** and the carbanion intermediates **VI** in the reaction, the NMR experiments were performed.

### 2.4.1 NMR analysis on the reaction of PhMe<sub>2</sub>SiBpin, <sup>t</sup>BuOK and styrene.

**Experimental procedure:** In an argon-filled glove box, an oven-dried 10 mL schlenk-tube was charged PhMe<sub>2</sub>SiBpin (26.2 mg, 0.1 mmol, 1.0 equiv.), <sup>t</sup>BuOK (0.2 mmol, 2.0 equiv.), dry THF-*d*<sub>8</sub> (0.5 ML), stirred at room temperature for 30 min to afford the intermediate (**V**). Then the <sup>11</sup>B, <sup>1</sup>H, and <sup>29</sup>Si NMR analysis of the crude reaction mixture was carried out immediately, which is labeled as **b**, **e**, **g**. After which, adding 1.0 equiv. of styrene into another parallel experiment, and shaking for 5 min, the <sup>11</sup>B and <sup>1</sup>H NMR spectrum analysis of the reaction mixture was acquired again, which are labeled as **c**, **h**, and **d** (as shown in Figure S4-S5). In addition, the control NMR experiments were also conducted using PhMe<sub>2</sub>SiBpin (26.2 mg, 0.1 mmol, 1.0 equiv.) in dry THF-*d*<sub>8</sub> (0.5 ML), and the result of <sup>11</sup>B, <sup>29</sup>Si and <sup>1</sup>H NMR analysis was labeled as **a**, **d**, **f**.

#### Chemical equilibria analysis

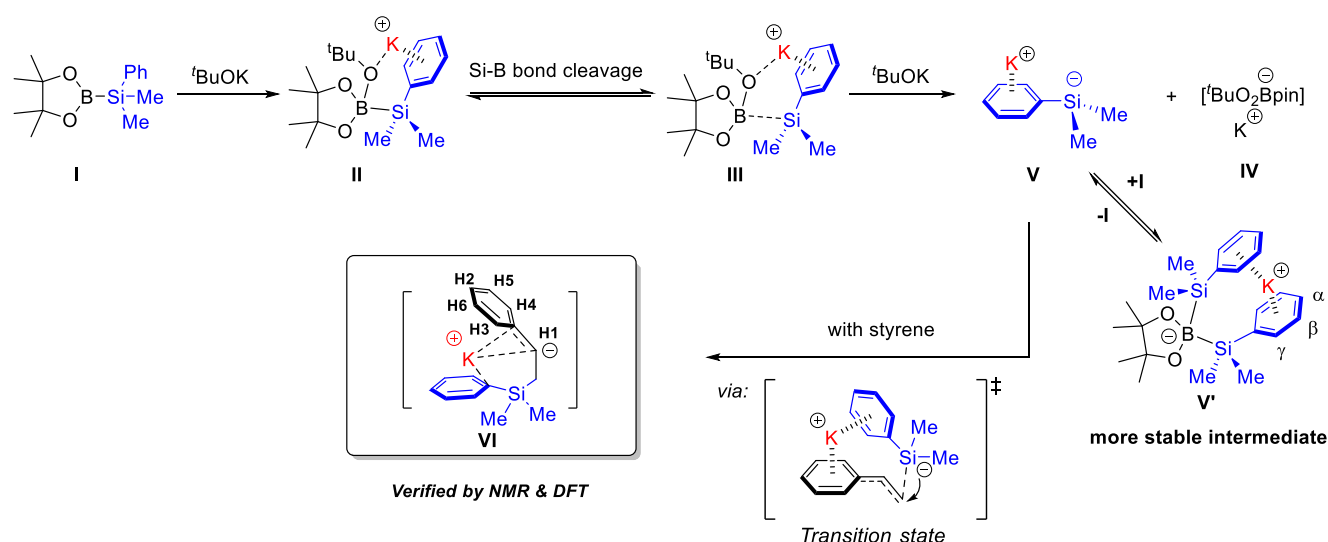

**Figure S3.** Chemical equilibria for the reaction of PhMe<sub>2</sub>SiBpin, <sup>t</sup>BuOK and styrene.

The experimental results indicate that the mixed system primarily forms the PhMe<sub>2</sub>Si<sub>2</sub>-BpinK species (**V'**), which is consistent with the single-crystal structural data of **V'-1** (CCDC-893778) previously reported<sup>[1]</sup>. As shown in Figure S4, <sup>11</sup>B NMR analysis indicated that two tetracoordinated boron resonances at δ 5.2 and 4.3 can be attributed to two species of [(PhMe<sub>2</sub>Si)<sub>2</sub>Bpin]<sup>-</sup>K<sup>+</sup> **V'** and [(<sup>t</sup>BuO)<sub>2</sub>Bpin]<sup>-</sup>K<sup>+</sup> **IV'**, as corroborated by previous researches<sup>[2]</sup> and the DFT calculations. Additionally, the <sup>1</sup>H NMR spectrum indicated a notable change in the chemical shift of the phenyl group in [(PhMe<sub>2</sub>Si)<sub>2</sub>Bpin]<sup>-</sup>K<sup>+</sup> **V'**, a finding that aligns with our DFT calculations. Furthermore, the <sup>29</sup>Si NMR spectrum showed only one peak at -26.3 ppm, which most likely corresponds to the

$[(\text{PhMe}_2\text{Si})_2\text{Bpin}]^-\text{K}^+$  species **V'** according to previous reports<sup>[1]</sup> and our calculational NMR chemical shifts (Figure S4, red).

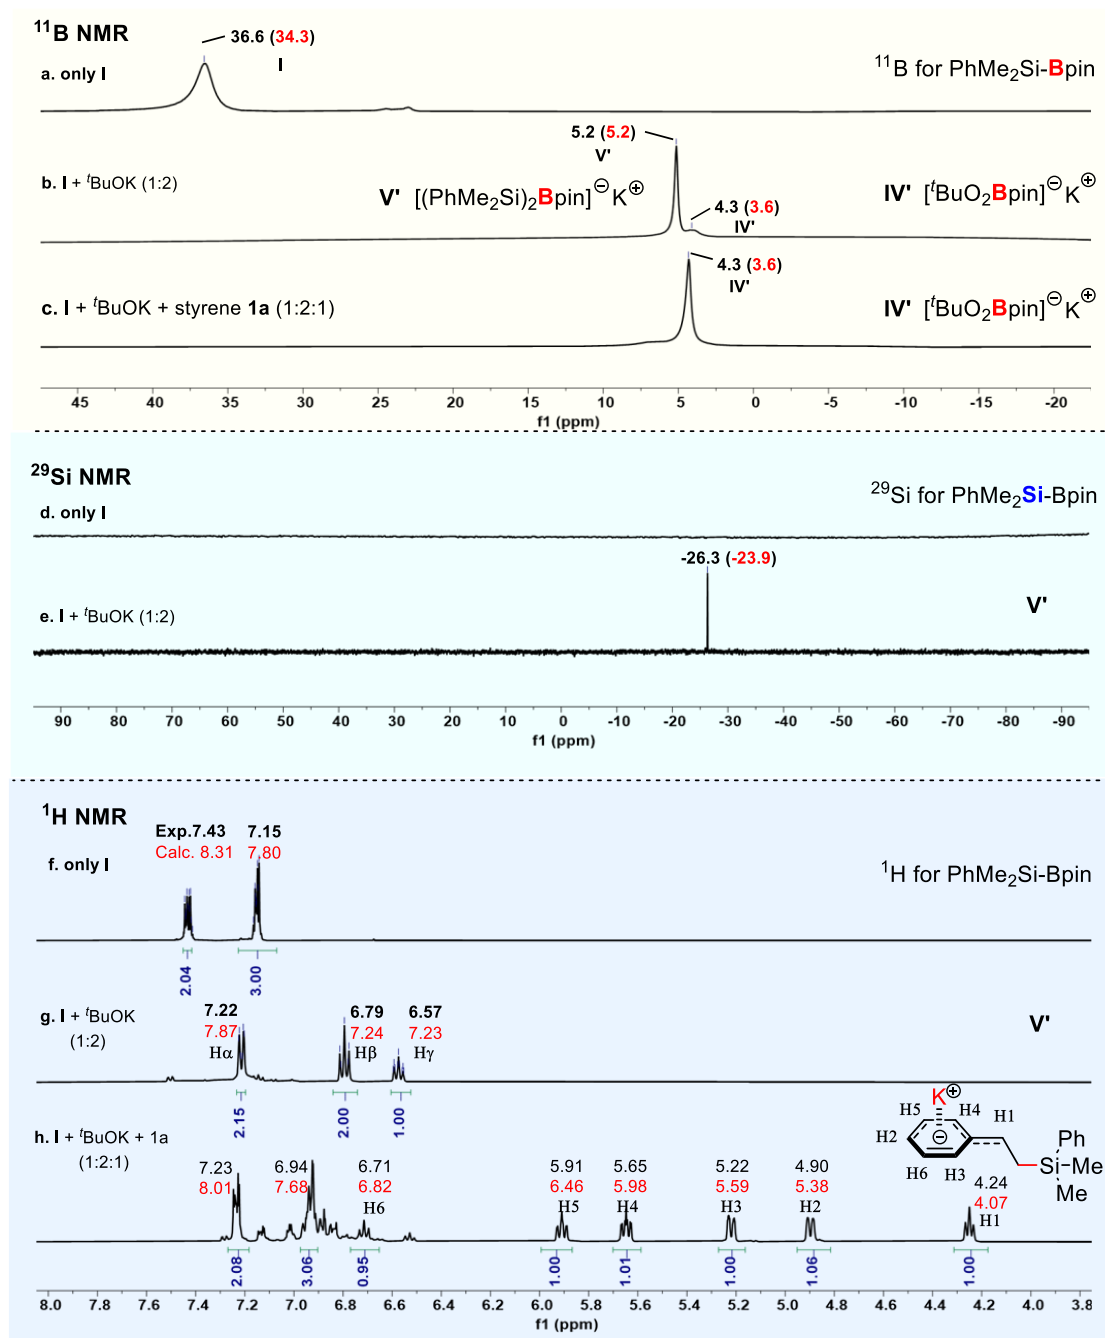

**Figure S4.** NMR analysis on the reaction of  $\text{PhMe}_2\text{SiBpin}$  with/without <sup>t</sup>BuOK and styrene. **a**, <sup>11</sup>B NMR spectrum of  $\text{PhMe}_2\text{SiBpin}$  **I**; **b**, <sup>11</sup>B NMR spectrum for the reaction mixture of **I** and 2.0 equivalent of <sup>t</sup>BuOK; **c**, <sup>11</sup>B NMR spectrum for the reaction mixture of  $\text{PhMe}_2\text{SiBpin}$ , 2.0 equivalent of <sup>t</sup>BuOK and styrene; **d**, <sup>29</sup>Si NMR spectrum of  $\text{PhMe}_2\text{SiBpin}$  **I**; **e**, <sup>29</sup>Si NMR spectrum for the reaction mixture of **I** and 2.0 equivalent of <sup>t</sup>BuOK; **f**, <sup>1</sup>H NMR spectrum of  $\text{PhMe}_2\text{SiBpin}$  **I**; **g**, <sup>1</sup>H NMR spectrum for the reaction mixture of **I** and 2.0 equivalent of <sup>t</sup>BuOK; **h**, <sup>1</sup>H NMR spectrum for the reaction mixture of  $\text{PhMe}_2\text{SiBpin}$ , 2.0 equivalent of <sup>t</sup>BuOK and styrene; Chemical shifts shown in red were computed with the Gauge-independent atomic orbital (GIAO) method<sup>[3]</sup> at B972/pcSseg-2 level of theory.

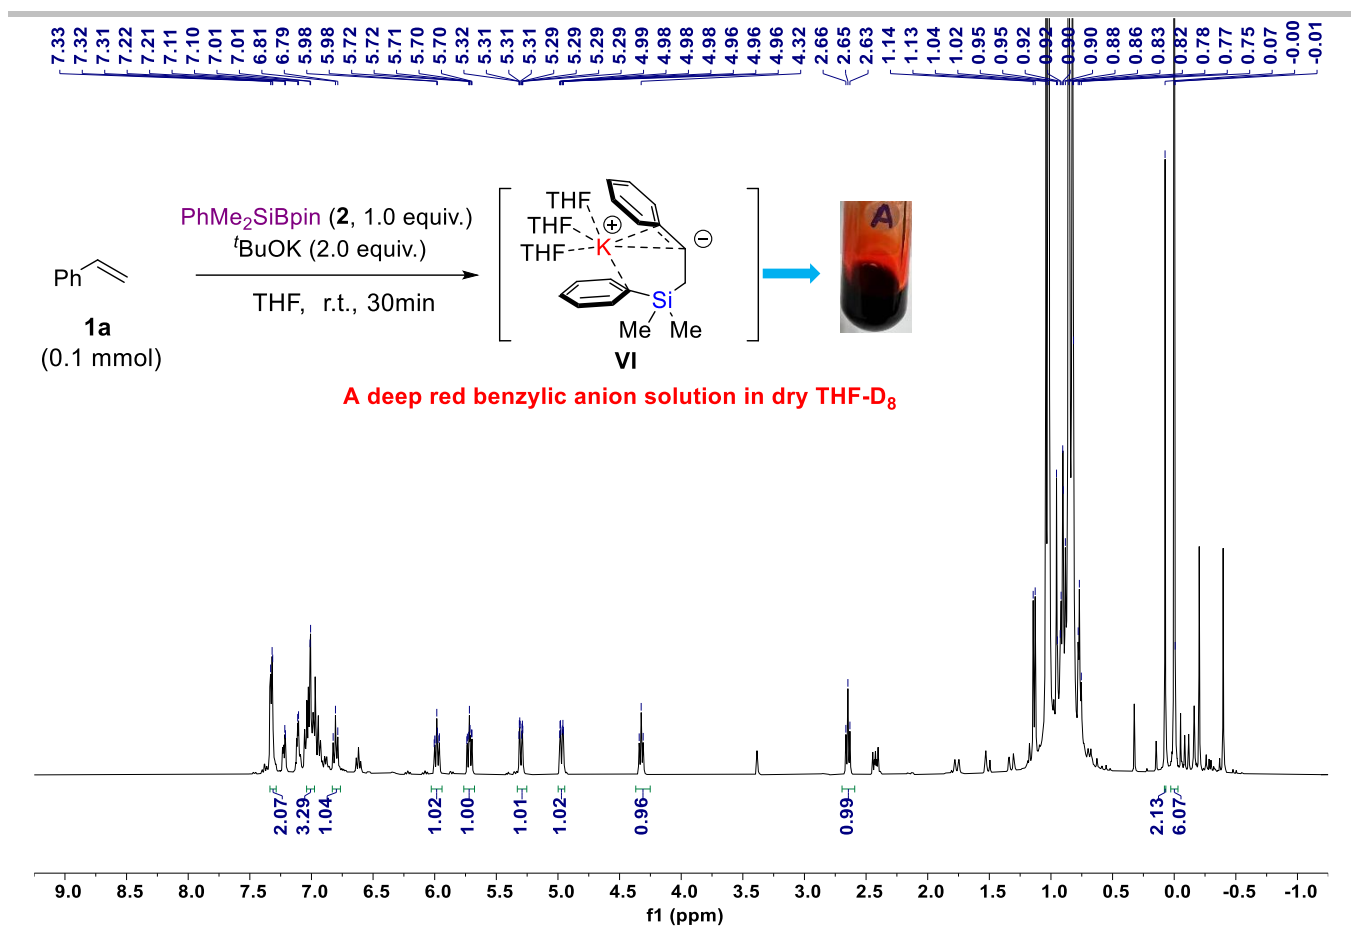

**Figure S5.** <sup>1</sup>H NMR spectrum for the reaction mixture of PhMe<sub>2</sub>SiBpin, 2.0 equivalent of <sup>t</sup>BuOK and styrene.

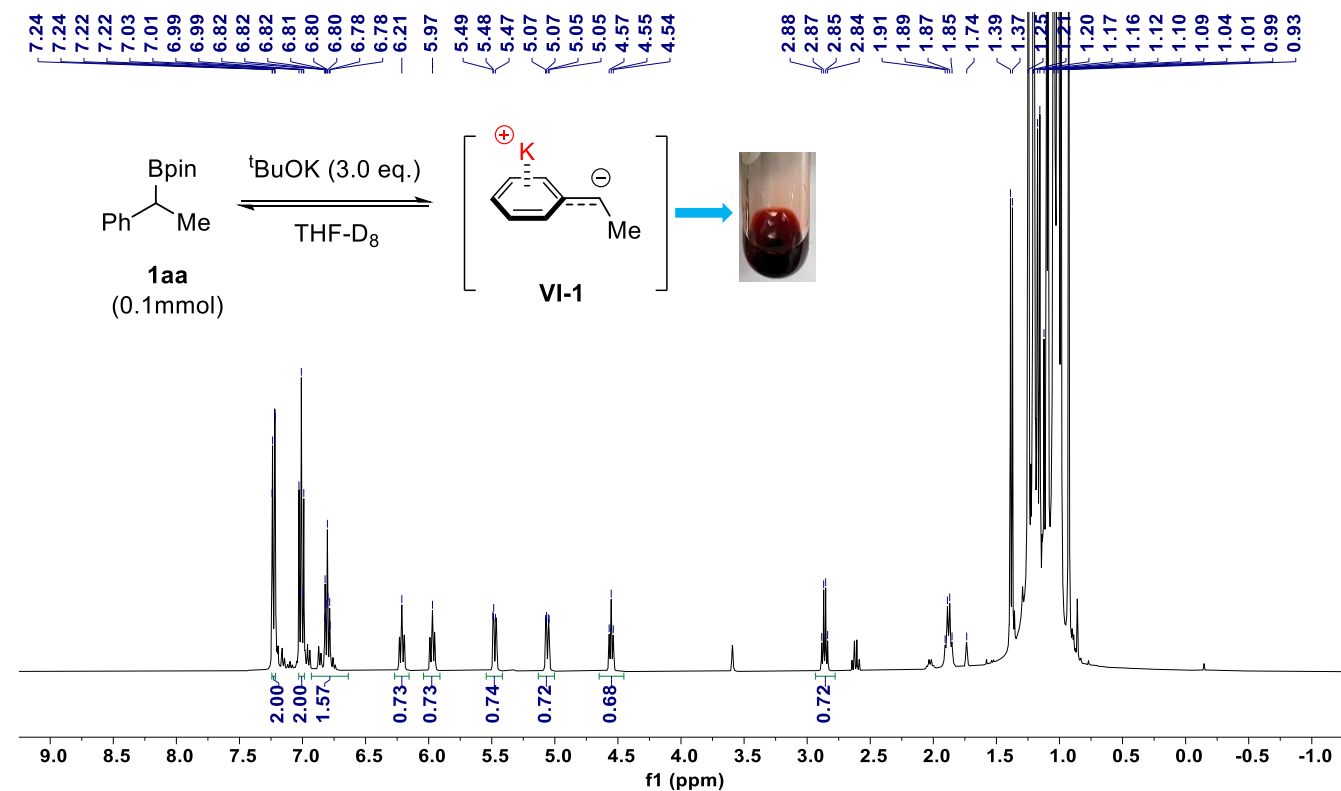

**Figure S6.** <sup>1</sup>H NMR spectrum for the reaction mixture of PhCH(Bpin)CH<sub>3</sub> **1aa**, 3.0 equivalent of <sup>t</sup>BuOK.

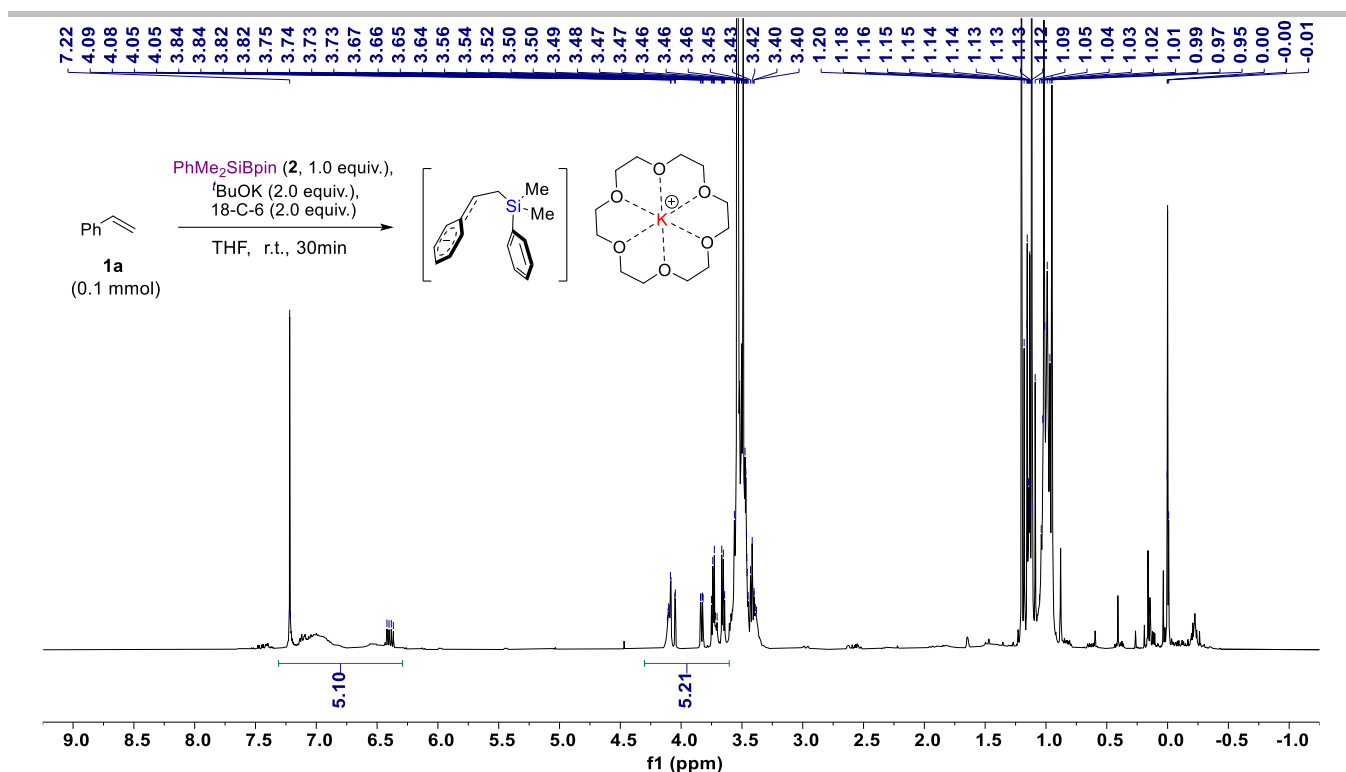

**Figure S7.**  $^1\text{H}$  NMR spectrum for the reaction mixture of  $\text{PhMe}_2\text{SiBpin}$ , 2.0 equivalent of  $t\text{BuOK}$  and styrene with 2.0 equivalent 18-crown-6 as the additive, in  $\text{THF-D}_8$ .

#### 2.4.2 Trapping the carbanion by deuterium oxide

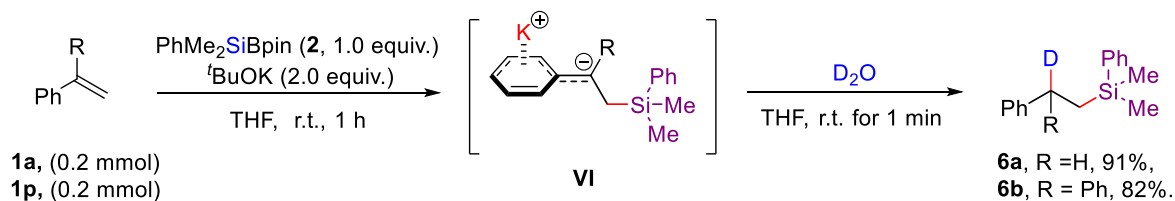

**Experimental procedure:** In an argon-filled glove box, an oven-dried 10 mL schlenk tube was charged styrene **1a** (20.8 mg, 0.2 mmol, 1.0 equiv.),  $\text{PhMe}_2\text{SiBpin}$  (52.4 mg, 0.2 mmol, 1.0 equiv.),  $t\text{BuOK}$  (44.9 mg, 0.40 mmol, 2.0 equiv.), stirred at room temperature for 10 min. Then the reaction mixture was quenched by deuterium oxide ( $\text{D}_2\text{O}$ , 50  $\mu\text{L}$ ) and diluted by ethyl acetate (2 mL). The organic phase was separated, and the aqueous layer was extracted with ethyl acetate (3 $\times$ 3 mL). Then, the organic layers were combined, and dried over anhydrous sodium sulfate and filtered. After removal of the solvent under reduced pressure, the crude material was purified by preparative TLC (petroleum ether) to afford the hydrosilylation product **3a** as colorless oil (44.0 mg, 91% yield).  $^1\text{H}$  NMR (400 MHz,  $\text{CDCl}_3$ ):  $\delta$  7.60 – 7.56 (m, 2H), 7.44 – 7.39 (m, 3H), 7.35 – 7.27 (m, 2H), 7.25 – 7.15 (m, 3H), 2.72 – 2.62 (m, 1H), 1.17 (d,  $J = 9.1$  Hz, 2H), 0.34 (s, 6H) ppm.  $^{13}\text{C}\{^1\text{H}\}$  NMR (100 MHz,  $\text{CDCl}_3$ ):  $\delta$  145.0, 139.1, 133.6, 129.0, 128.3, 127.8, 127.8, 125.6, 29.8 (t, 19.3 Hz), 17.7, -3.1 ppm.

**Experimental procedure:** In an argon-filled glove box, an oven-dried 10 mL schlenk tube was charged 1,1-diphenylethylene **1p** (36.0 mg, 0.2 mmol, 1.0 equiv.),  $\text{PhMe}_2\text{SiBpin}$  (52.4 mg, 0.2 mmol,

1.0 equiv.), <sup>t</sup>BuOK (44.9 mg, 0.40 mmol, 2.0 equiv.), stirred at room temperature for 10 min. Then the reaction mixture was quenched by deuterium oxide (D<sub>2</sub>O, 50 μL) and diluted by ethyl acetate (2 mL). The organic phase was separated, and the aqueous layer was extracted with ethyl acetate (3×3 mL). Then, the organic layers were combined, and dried over anhydrous sodium sulfate and filtered. After removal of the solvent under reduced pressure, the crude material was purified by preparative TLC (petroleum ether) to afford the hydrosilylation product **3b** as colorless oil (52.1 mg, 82% yield). <sup>1</sup>H NMR (400 MHz, CDCl<sub>3</sub>): δ 7.52 – 7.46 (m, 2H), 7.42 – 7.36 (m, 3H), 7.33 – 7.25 (m, 8H), 7.22 – 7.15 (m, 2H), 1.70 (s, 2H), 0.09 (s, 6H) ppm. <sup>13</sup>C NMR (101 MHz, CDCl<sub>3</sub>) δ 146.8, 139.2, 133.6, 128.9, 128.4, 127.8, 127.6, 126.1, 46.8 (t, *J* = 19.4 Hz), 23.3, -2.7 ppm.

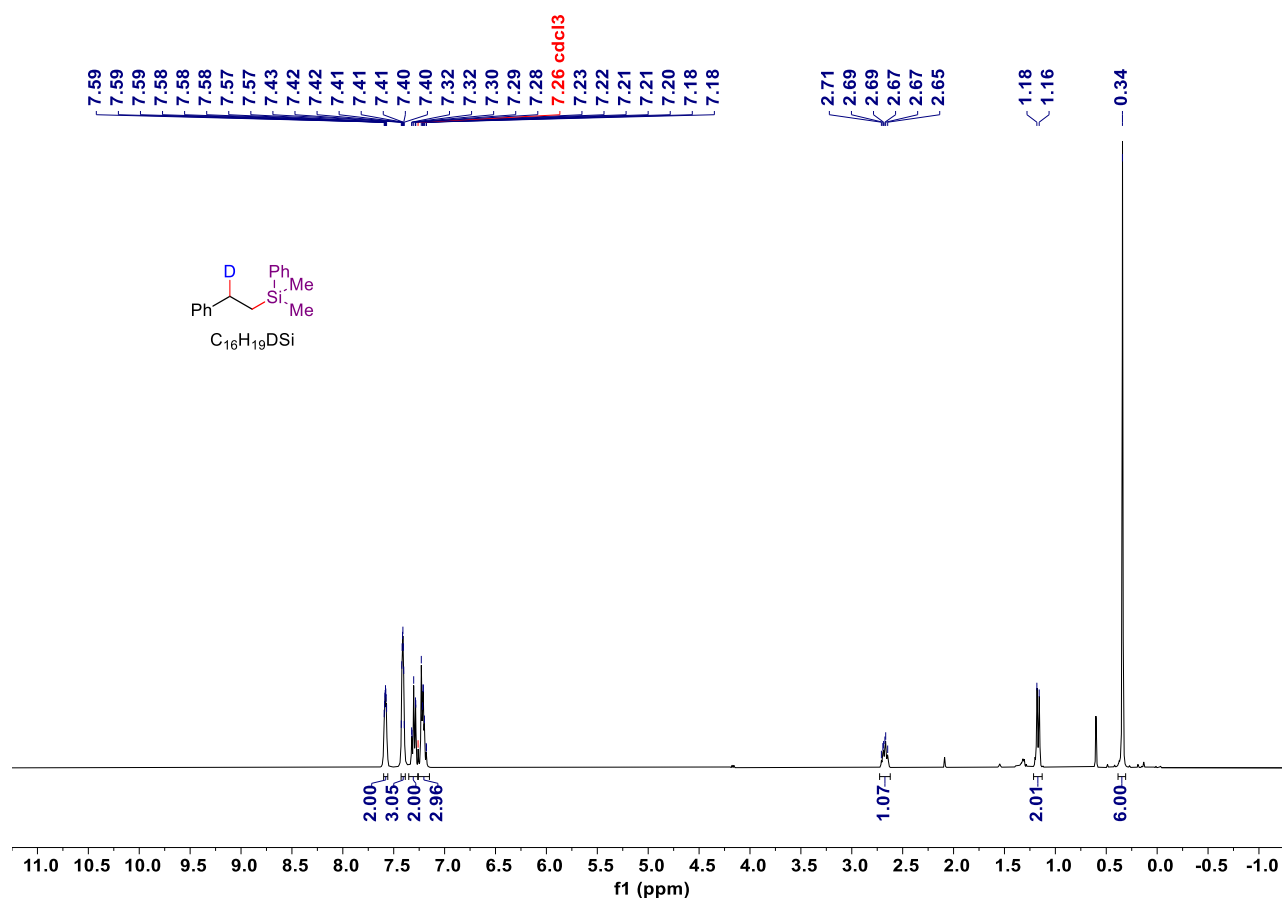

Figure S8. <sup>1</sup>H NMR spectrum (400 MHz, CDCl<sub>3</sub>) of compound **3a**.

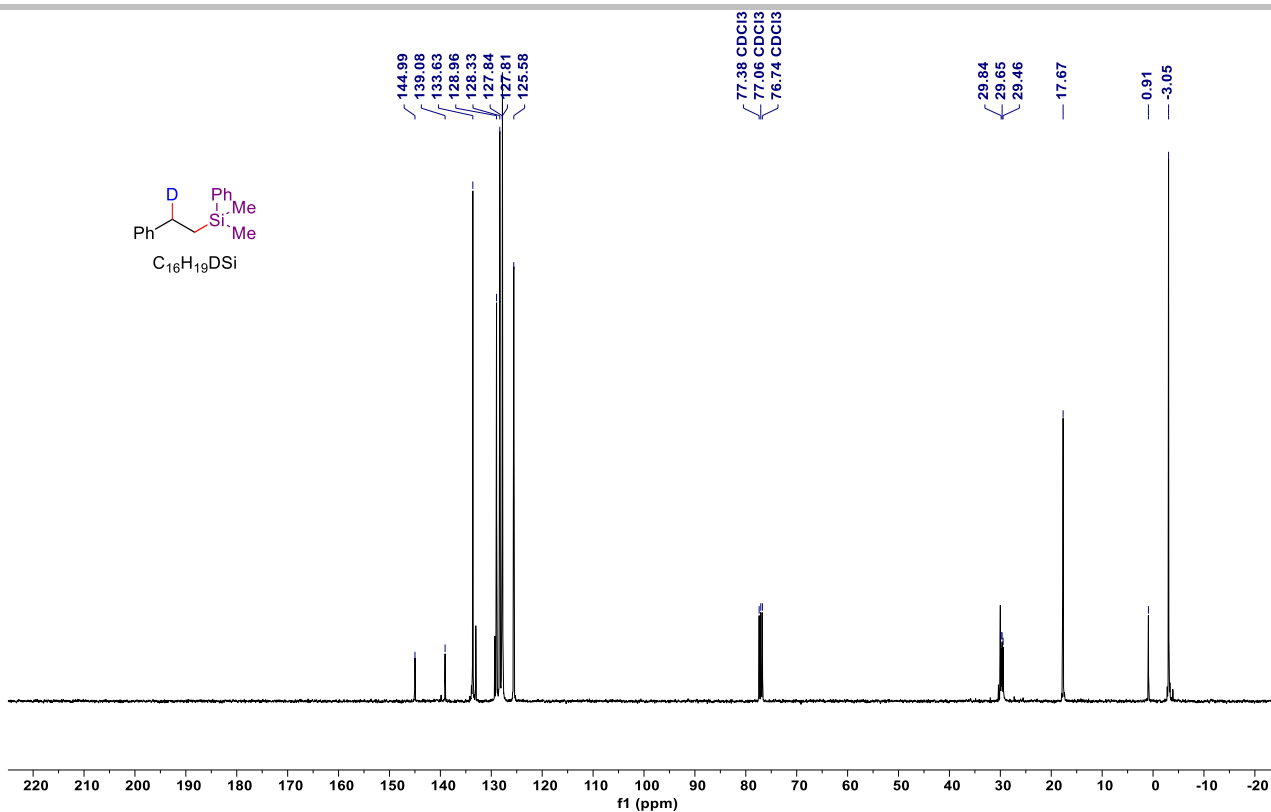

Figure S9.  $^{13}\text{C}\{^1\text{H}\}$  NMR spectrum (100 MHz,  $\text{CDCl}_3$ ) of compound 3a.

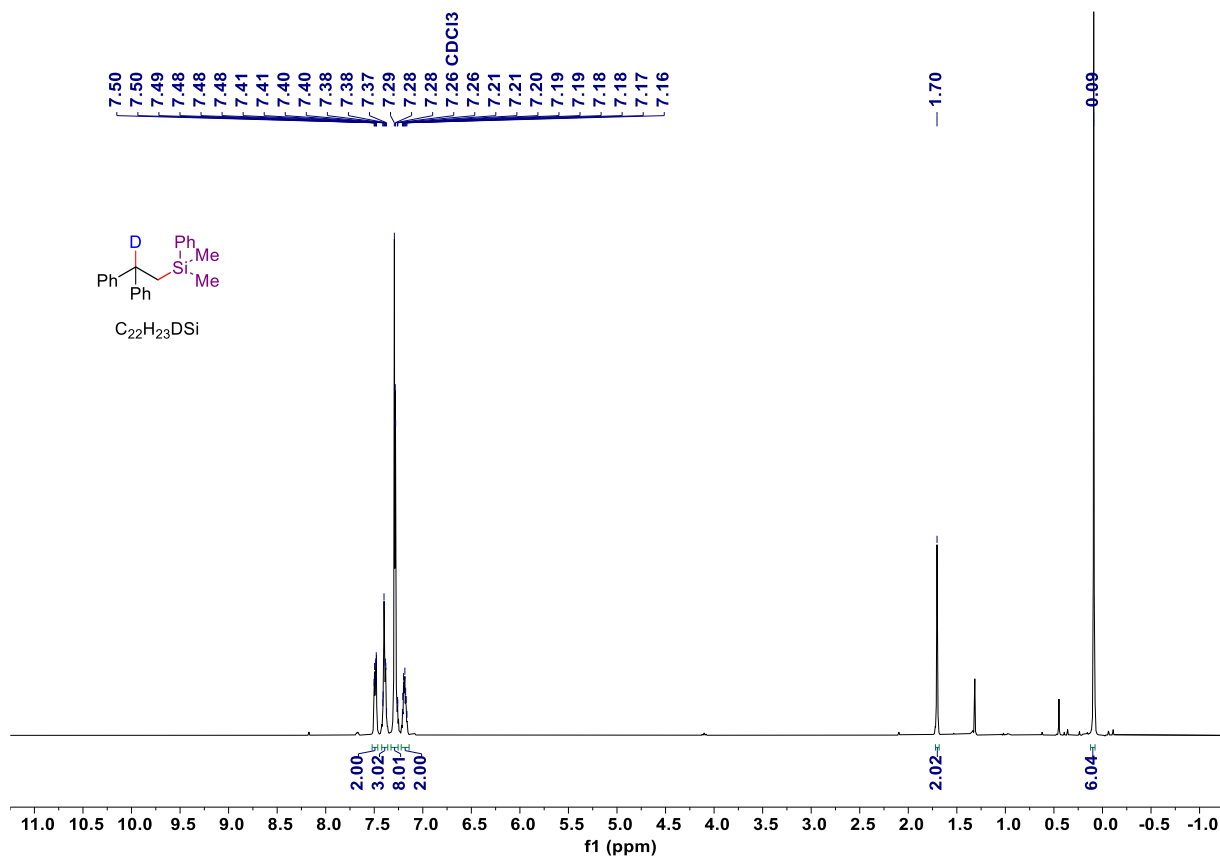

Figure S10.  $^1\text{H}$  NMR spectrum (400 MHz,  $\text{CDCl}_3$ ) of compound 3b.

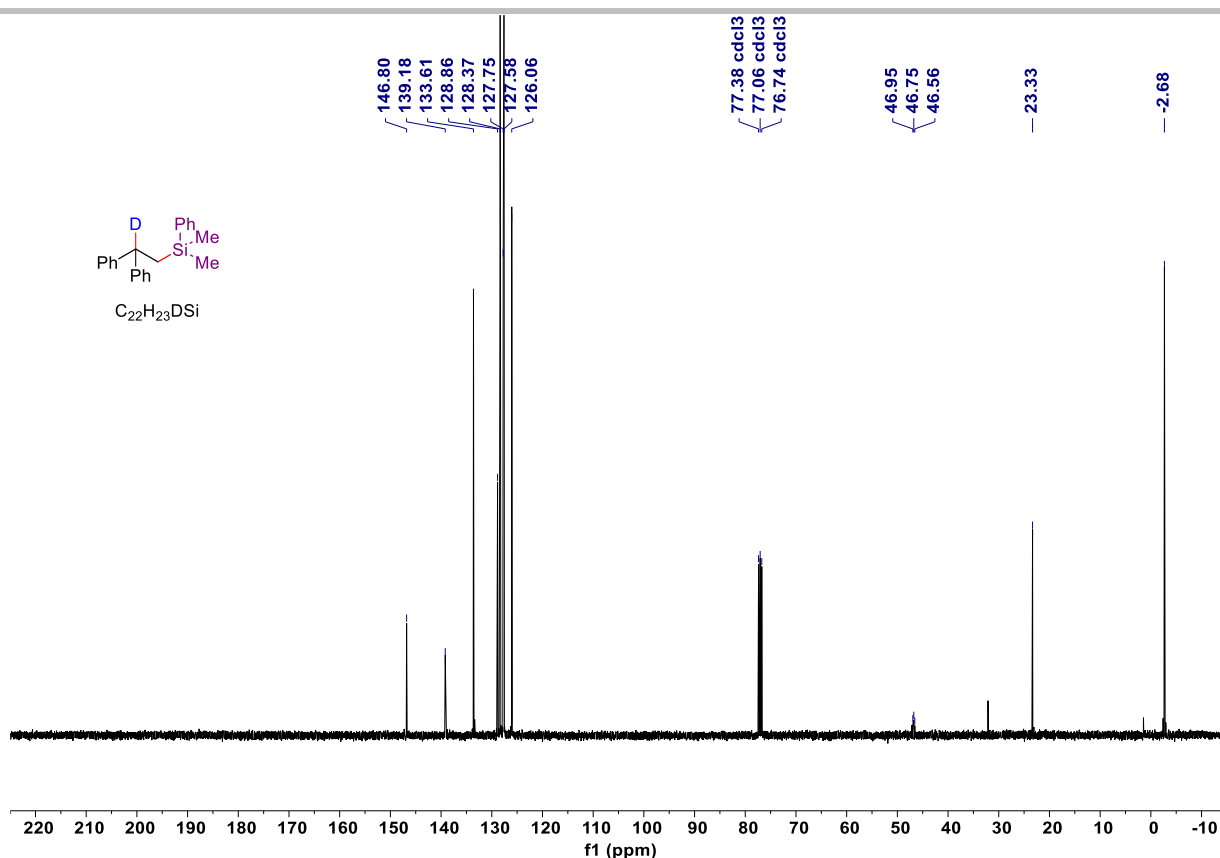

**Figure S11.**  $^{13}\text{C}$  NMR spectrum (100 MHz,  $\text{CDCl}_3$ ) of compound **3b**.

#### 2.4.3 Trapping the carbanion with chlorotrimethylsilane

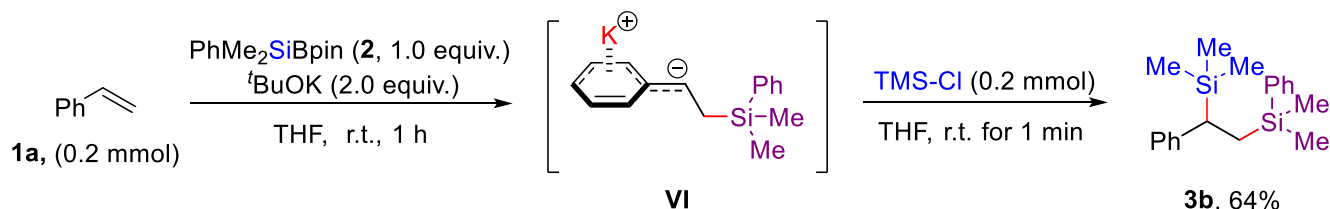

**Experimental procedure:** In an argon-filled glove box, an oven-dried 10 mL Schlenk tube was charged with styrene **1a** (20.8 mg, 0.2 mmol, 1.0 equiv.),  $\text{PhMe}_2\text{SiBpin}$  **2a** (52.4 mg, 0.2 mmol, 1.0 equiv.),  $t\text{BuOK}$  (44.9 mg, 0.40 mmol, 2.0 equiv.), stirred at room temperature for 30 min. Then the reaction mixture was quenched by chlorotrimethylsilane (TMSCl, 0.2 mmol, 1.0 equiv.) and diluted by ethyl acetate (2 mL). The organic phase was separated, and the aqueous layer was extracted with ethyl acetate (3×3 mL). Then, the organic layers were combined, and dried over anhydrous sodium sulfate and filtered. After removal of the solvent under reduced pressure, the crude material was purified by preparative TLC (petroleum ether) to afford the hydrosilylation product **3c** as colorless oil (40.1 mg, 64% yield).  $^1\text{H}$  NMR (400 MHz,  $\text{CDCl}_3$ ):  $\delta$  7.55 – 7.48 (m, 2H), 7.46 – 7.34 (m, 3H), 7.29 – 7.24 (m, 2H), 7.19 – 7.12 (m, 1H), 7.09 – 7.05 (m, 2H), 2.18 – 2.14 (m, 1H), 1.42 – 1.37 (m, 1H), 1.21 (dd,  $J = 15.2, 2.3$  Hz, 1H), 0.16 (s, 3H), 0.07 (s, 3H), 0.00 (s, 9H) ppm.  $^{13}\text{C}\{^1\text{H}\}$  NMR (100 MHz,

CDCl<sub>3</sub>): δ 144.8, 139.9, 133.6, 128.7, 127.9, 127.9, 127.7, 124.3, 31.5, 15.3, -1.9, -3.2, -3.3 ppm.

HRMS (ESI): calculated for C<sub>19</sub>H<sub>29</sub>Si<sub>2</sub><sup>+</sup> [M+H]<sup>+</sup> 313.1802; found 313.1798.

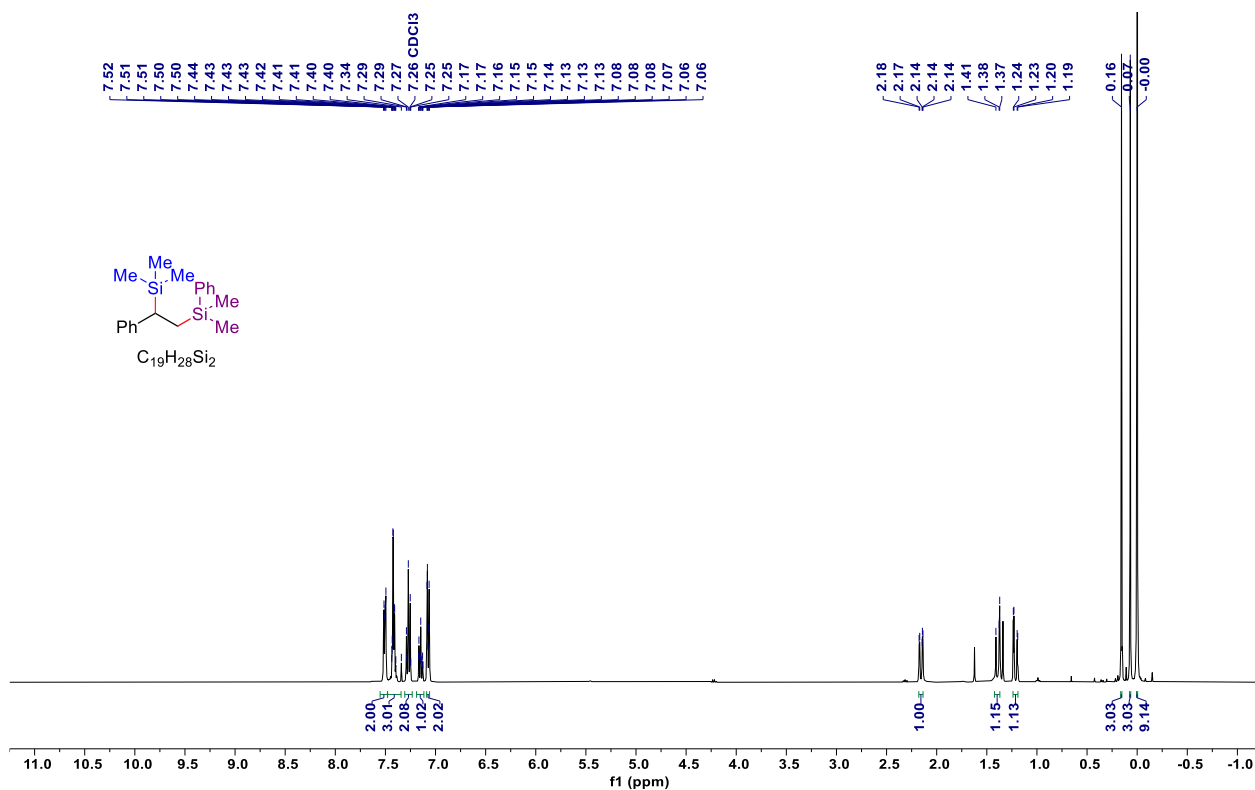

Figure S12. <sup>1</sup>H NMR spectrum (400 MHz, CDCl<sub>3</sub>) of compound 6c.

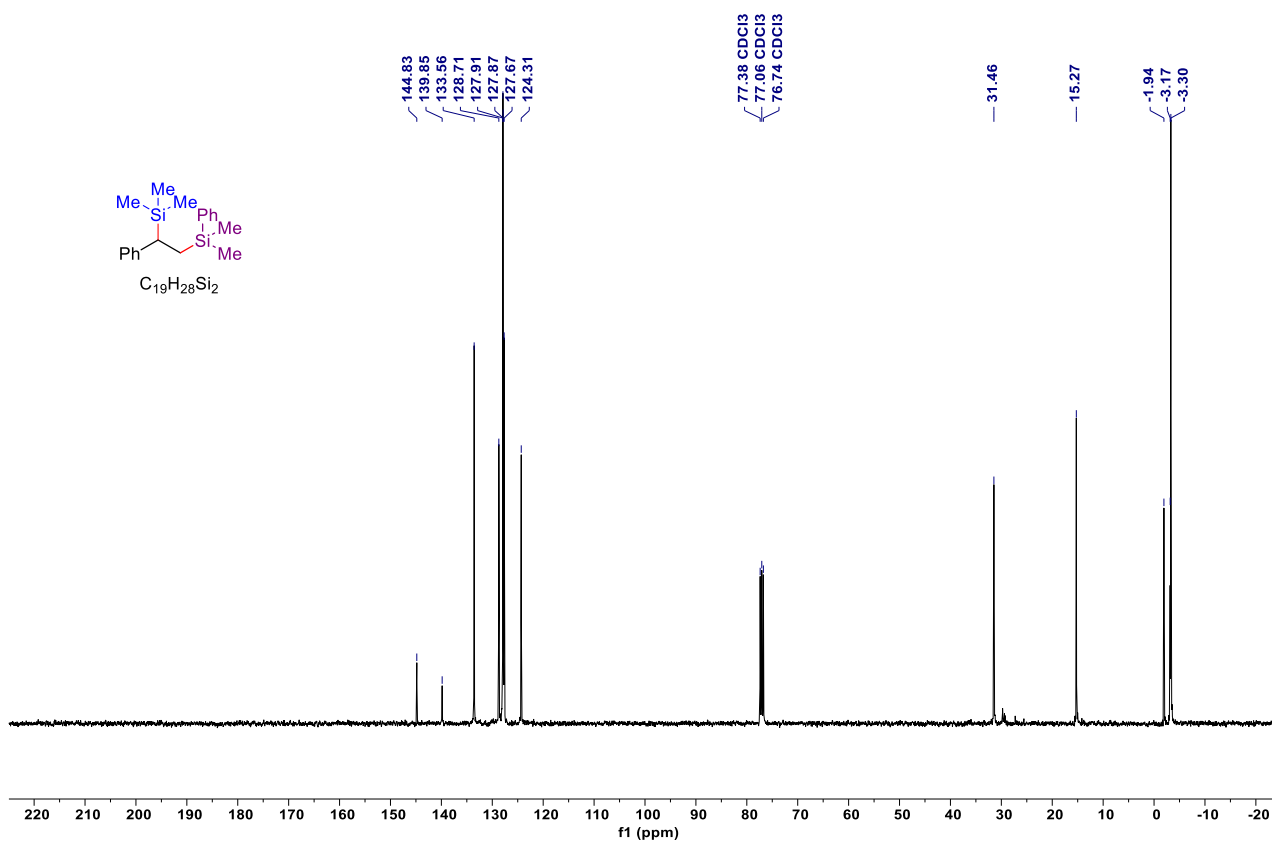

Figure S13. <sup>13</sup>C{<sup>1</sup>H} NMR spectrum (100 MHz, CDCl<sub>3</sub>) of compound 6c.



These results confirm the involvement of the  $\beta$ -silyl carbanion intermediate **V**, which is also consistent with our DFT calculations.

#### 2.4.4 Electron paramagnetic resonance (EPR) experiments

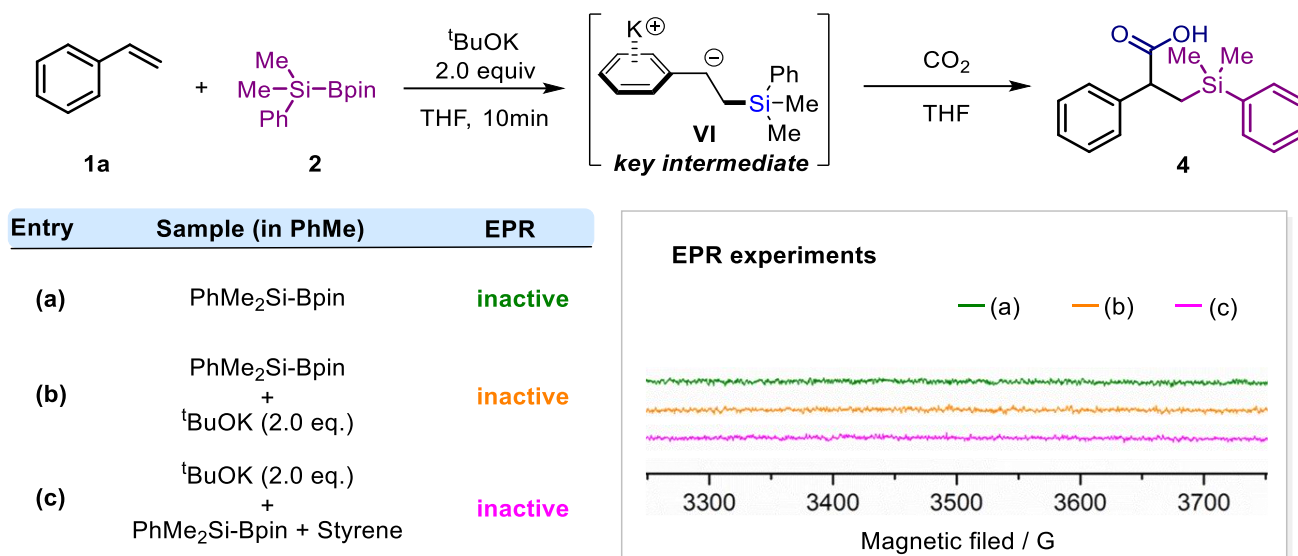

**Figure S14.** EPR experiments.

As shown in Figure S14, the EPR experiments were also conducted to detect the potential silyl or carbon radical. However, the reaction between PhMe<sub>2</sub>SiBpin and <sup>t</sup>BuOK (entry b) or styrene, PhMe<sub>2</sub>SiBpin and <sup>t</sup>BuOK (entry c) does not show any signal of free radicals. Our calculation results indicated that the silyl radical generation from complex **II** or **II** with <sup>t</sup>BuOK are thermodynamically unfavorable processes, and these processes are endergonic by 43.4 kcal/mol and 32.8 kcal/mol, respectively (see Figure S17 for details). These computational results are consistent with the fact that no radical species are detectable by EPR experiments under current reaction conditions. Thus, SET mechanisms for the silyl radical addition pathway can be excluded.

**Effect of additives<sup>a</sup>**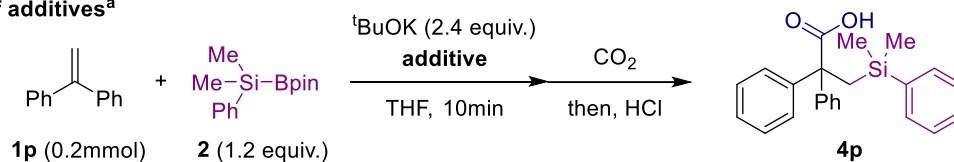

| entry | additive                              | yield of <b>4p</b> <sup>b</sup> |
|-------|---------------------------------------|---------------------------------|
| 1     | none                                  | 82%                             |
| 2     | 10 mol% 1,10-phenanthroline           | 60%                             |
| 3     | 10 mol% <i>N</i> -methylpyrrolidone   | 66%                             |
| 4     | 1.0 equiv <i>N</i> -methylpyrrolidone | n.d.                            |
| 5     | 1.0 equiv <i>N</i> -methylglycine     | n.d.                            |

**Elimination of radical pathway: possible silyl conjugate addition of  $\alpha,\beta$ -unsaturated carbonyl compound**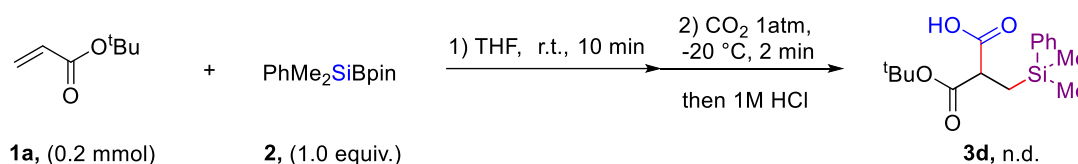**Figure S15.** Control experiment.

To further investigate the reaction mechanism and exclude the possibility of a silyl radical pathway, we designed a series of control experiments. First, we introduced three typical SET promoters into the system: 1,10-phenanthroline, *N*-methylpyrrolidone (NMP), and *N*-methylglycine, which are known to significantly enhance radical reactions mediated by  $\text{tBuOK}$ . Notably, the addition of 10 mol% 1,10-phenanthroline and NMP reduced the reaction yields to 22% and 16%, respectively, while stoichiometric amounts of NMP or *N*-methylglycine completely suppressed the reaction. This observation further negates the possibility of a SET mechanism. Subsequently, tert-butyl acrylate was employed as a potential silyl radical acceptor, as its conjugate addition with silyl radicals has been well-documented in the literature<sup>[4]</sup>. However, the expected target product or silyl addition products were not detected, suggesting that the reaction may not proceed via a radical mechanism. Finally, electron spin resonance (ESR) spectroscopy conducted in the presence of styrene (see Figure S14) detected no radical signals. Collectively, these experimental evidences lead us to conclude that the  $\text{tBuOK}$ -mediated single-electron transfer model is not applicable to this system.

### 3. Spectroscopic Characterization Data

#### 3.2.1 3-(dimethyl(phenyl)silyl)-2-phenylpropanoic acid (**4a**)

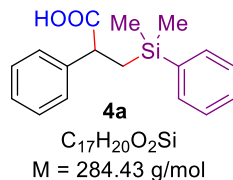

Prepared according to general procedure B from styrene (20.8 mg, 0.20 mmol, 1.0 equiv.),  $PhMe_2SiBpin$  (63.0 mg, 0.24 mmol, 1.2 equiv.),  $tBuOK$  (53.8 mg, 0.48 mmol, 2.4 equiv.), stirred for 30 min. Then, the direct bubbling of dry  $CO_2$  through the reaction mixture, stirred at room temperature for 30 s. After the reaction finished, 1M HCl solution (~0.5 mL) was added to the reaction mixture, and the organic phase was separated. The aqueous layer was extracted with EtOAc (3x5 mL). Then, the organic layers were combined, dried over anhydrous sodium sulfate, and filtered. After the removal of the solvent under reduced pressure, the crude material was purified by preparative TLC (petroleum ether/ethyl acetate = 1:1) to afford **4a** as a colorless oil (43.4 mg, 76% yield).  $^1H$  NMR (400 MHz,  $CDCl_3$ ):  $\delta$  7.46 – 7.40 (m, 2H), 7.34 – 7.28 (m, 3H), 7.29 – 7.24 (m, 5H), 3.61 (t,  $J = 7.8$  Hz, 1H), 1.64 (dd,  $J = 14.8, 7.4$  Hz, 1H), 1.38 (dd,  $J = 14.8, 8.3$  Hz, 1H), 0.14 (s, 3H), 0.14 (s, 3H) ppm.  $^{13}C\{^1H\}$  NMR (100 MHz,  $CDCl_3$ ):  $\delta$  180.8, 140.1, 138.1, 133.6, 129.1, 128.6, 128.1, 127.8, 127.5, 47.2, 20.3, -2.7, -3.1 ppm. IR (film): 3252, 3068, 3028, 2954, 1703, 1550, 1426, 1248, 1113, 865, 836, 729, 698  $cm^{-1}$ . HRMS (ESI): calculated for  $C_{17}H_{19}O_2Si^-$  [M-H] $^-$  283.1160; found 283.1156.

#### 3.2.2 2-([1,1'-biphenyl]-4-yl)-3-(dimethyl(phenyl)silyl)propanoic acid (**4b**)

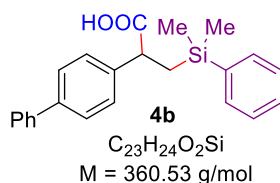

Prepared according to general procedure B from 4-vinyl-1,1'-biphenyl (36.0 mg, 0.20 mmol, 1.0 equiv.),  $PhMe_2SiBpin$  (63.0 mg, 0.24 mmol, 1.2 equiv.),  $tBuOK$  (53.8 mg, 0.48 mmol, 2.4 equiv.), stirred for 30 min. Then, the direct bubbling of dry  $CO_2$  through the reaction mixture, stirred at room temperature for 30 s. After the reaction finished, 1M HCl solution (~0.5 mL) was added to the reaction mixture, and the organic phase was separated. The aqueous layer was extracted with EtOAc (3x5 mL). Then, the organic layers were combined, dried over anhydrous sodium sulfate, and filtered. After the removal of the solvent under reduced pressure, the crude material was purified by preparative TLC (petroleum ether/ethyl acetate = 1:1) to afford **4b** as gum (49.0 mg, 68% yield).  $^1H$  NMR (400 MHz,  $CDCl_3$ ):  $\delta$  7.45

– 7.36 (m, 3H), 7.35 – 7.29 (m, 2H), 7.28 – 7.22 (m, 5H), 7.20 – 7.09 (m, 9H), 3.48 (t,  $J = 7.8$  Hz, 1H), 1.50 (dd,  $J = 14.8, 7.4$  Hz, 1H), 1.24 (dd,  $J = 14.8, 8.4$  Hz, 1H), 0.04 (s, 3H), 0.01 (s, 3H) ppm.  $^{13}\text{C}\{^1\text{H}\}$  NMR (100 MHz,  $\text{CDCl}_3$ ):  $\delta$  180.0, 140.7, 140.4, 139.1, 138.0, 133.6, 129.1, 128.8, 128.4, 127.8, 127.6, 127.3, 127.1, 46.7, 20.3, -2.8, -3.0 ppm. HRMS (ESI): calculated for  $\text{C}_{23}\text{H}_{23}\text{O}_2\text{Si}^-$  [M-H] $^-$  359.1473; found 359.1469.

### 3.2.3 3-(dimethyl(phenyl)silyl)-2-(2-methoxyphenyl)propanoic acid (**4c**)

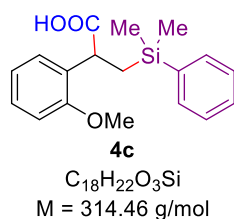

Prepared according to general procedure B from 2-methoxy-styrene (26.8 mg, 0.20 mmol, 1.0 equiv.),  $\text{PhMe}_2\text{SiBpin}$  (63.0 mg, 0.24 mmol, 1.2 equiv.),  $t\text{BuOK}$  (53.8 mg, 0.48 mmol, 2.4 equiv.), stirred for 30 min. Then, the direct bubbling of dry  $\text{CO}_2$  through the reaction mixture, stirred at room temperature for 30 s. After the reaction finished, 1M HCl solution (~0.5 mL) was added to the reaction mixture, and the organic phase was separated. The aqueous layer was extracted with EOAc (3x5 mL). Then, the organic layers were combined, dried over anhydrous sodium sulfate, and filtered. After the removal of the solvent under reduced pressure, the crude material was purified by preparative TLC (petroleum ether/ethyl acetate = 1:1) to afford **4c** as gum (39.2 mg, 62% yield).  $^1\text{H}$  NMR (400 MHz,  $\text{CDCl}_3$ ):  $\delta$  7.50 – 7.40 (m, 2H), 7.34 – 7.28 (m, 3H), 7.24 – 7.17 (m, 2H), 6.89 (td,  $J = 7.5, 1.1$  Hz, 1H), 6.81 (d,  $J = 7.6$  Hz, 1H), 4.12 (dd,  $J = 8.9, 6.6$  Hz, 1H), 3.76 (s, 3H), 1.62 (dd,  $J = 14.8, 6.6$  Hz, 1H), 1.40 (dd,  $J = 14.9, 9.0$  Hz, 1H), 0.15 (s, 3H), 0.13 (s, 3H) ppm.  $^{13}\text{C}\{^1\text{H}\}$  NMR (100 MHz,  $\text{CDCl}_3$ ):  $\delta$  180.9, 156.6, 138.7, 133.6, 128.9, 128.7, 128.4, 127.7, 120.7, 110.8, 55.4, 39.9, 19.0, -2.8, -3.0 ppm. HRMS (ESI): calculated for  $\text{C}_{18}\text{H}_{21}\text{O}_3\text{Si}^-$  [M-H] $^-$  313.1265; found 313.1268.

### 3.2.4 3-(dimethyl(phenyl)silyl)-2-(3-methoxyphenyl)propanoic acid (**4d**)

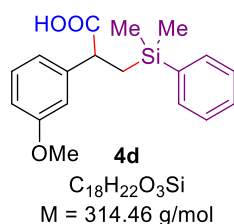

Prepared according to general procedure B from 3-methoxy-styrene (26.8 mg, 0.20 mmol, 1.0 equiv.), PhMe<sub>2</sub>SiBpin (63.0 mg, 0.24 mmol, 1.2 equiv.), <sup>t</sup>BuOK (53.8 mg, 0.48 mmol, 2.4 equiv.), stirred for 30 min. Then, the direct bubbling of dry CO<sub>2</sub> through the reaction mixture, stirred at room temperature for 30 s. After the reaction finished, 1M HCl solution (~0.5 mL) was added to the reaction mixture, and the organic phase was separated. The aqueous layer was extracted with EtOAc (3x5 mL). Then, the organic layers were combined, dried over anhydrous sodium sulfate, and filtered. After the removal of the solvent under reduced pressure, the crude material was purified by preparative TLC (petroleum ether/ethyl acetate = 1:1) to afford **4d** as gum (44.1 mg, 70% yield). <sup>1</sup>H NMR (400 MHz, CDCl<sub>3</sub>): δ 7.46 – 7.40 (m, 2H), 7.35 – 7.29 (m, 3H), 7.19 (td, *J* = 7.6, 1.0 Hz, 1H), 6.85 (d, *J* = 7.7 Hz, 1H), 6.81 – 6.74 (m, 2H), 3.76 (s, 3H), 3.57 (t, *J* = 7.8 Hz, 1H), 1.62 (dd, *J* = 14.8, 7.4 Hz, 1H), 1.36 (dd, *J* = 14.8, 8.3 Hz, 1H), 0.16 (s, 3H), 0.14 (s, 3H) ppm. <sup>13</sup>C{<sup>1</sup>H} NMR (100 MHz, CDCl<sub>3</sub>): δ 180.0, 159.7, 141.6, 138.1, 133.6, 129.6, 129.1, 127.8, 120.5, 113.7, 113.0, 55.2, 47.1, 20.3, -2.7, -3.0 ppm. HRMS (ESI): calculated for C<sub>18</sub>H<sub>21</sub>O<sub>3</sub>Si<sup>-</sup> [M-H]<sup>-</sup> 313.1265; found 313.1268.

### 3.2.5 3-(dimethyl(phenyl)silyl)-2-(4-(4,4,5,5-tetramethyl-1,3,2-dioxaborolan-2-yl)phenyl)propanoic acid (**4e**)

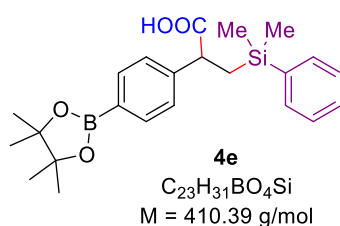

Prepared according to general procedure B from 4,4,5,5-tetramethyl-2-(4-vinylphenyl)-1,3,2-dioxaborolane (46.0 mg, 0.20 mmol, 1.0 equiv.), PhMe<sub>2</sub>SiBpin (52.8 mg, 0.20 mmol, 1.0 equiv.), <sup>t</sup>BuOK (44.9 mg, 0.40 mmol, 2.0 equiv.), stirred for 30 min. Then, the direct bubbling of dry CO<sub>2</sub> through the reaction mixture, stirred at room temperature for 30 s. After the reaction finished, 1M HCl solution (~0.5 mL) was added to the reaction mixture, and the organic phase was separated. The aqueous layer was extracted with EtOAc (3x5 mL). Then, the organic layers were combined, dried over anhydrous sodium sulfate, and filtered. After the removal of the solvent under reduced pressure, the crude material was purified by preparative TLC (petroleum ether/ethyl acetate = 1:1) to afford **4e** as gum (29.6 mg, 36% yield). <sup>1</sup>H NMR (400 MHz, CDCl<sub>3</sub>): δ 7.62 – 7.55 (m, 2H), 7.34 – 7.22 (m, 2H), 7.16 (dd, *J* = 4.9, 1.9 Hz, 2H), 7.15 – 7.08 (m, 3H), 3.46 (t, *J* = 7.8 Hz, 1H), 1.50 (dd, *J* = 14.8, 7.4 Hz, 1H), 1.23 (d, *J* = 8.3 Hz, 1H), 1.19 (s, 12H), -0.01 (s, 3H), -0.03 (s, 3H) ppm. <sup>13</sup>C{<sup>1</sup>H} NMR (100 MHz, CDCl<sub>3</sub>): δ 179.1, 143.4, 138.1, 135.1, 133.6, 129.1, 127.8, 127.5, 83.8, 47.2, 29.8, 24.9, 20.2, -2.6, -3.0 ppm. <sup>11</sup>B{<sup>1</sup>H} NMR (128 MHz, CDCl<sub>3</sub>): δ 30.98. HRMS (ESI): calculated for C<sub>23</sub>H<sub>30</sub>BO<sub>4</sub>Si<sup>-</sup> [M-H]<sup>-</sup> 409.2012; found 409.2010.

### 3.2.6 3-(dimethyl(phenyl)silyl)-2-methyl-2-phenylpropanoic acid (**4f**)

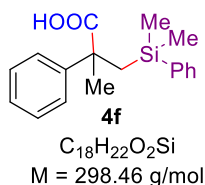

Prepared according to general procedure B from  $\alpha$ -methyl styrene (23.6 mg, 0.20 mmol, 1.0 equiv.), PhMe<sub>2</sub>SiBpin (63.0 mg, 0.24 mmol, 1.2 equiv.), <sup>t</sup>BuOK (53.8 mg, 0.48 mmol, 2.4 equiv.), stirred for 30 min. Then, the direct bubbling of dry CO<sub>2</sub> through the reaction mixture, stirred at room temperature for 30 s. After the reaction finished, 1M HCl solution (~0.5 mL) was added to the reaction mixture, and the organic phase was separated. The aqueous layer was extracted with EtOAc (3×5 mL). Then, the organic layers were combined, dried over anhydrous sodium sulfate, and filtered. After the removal of the solvent under reduced pressure, the crude material was purified by preparative TLC (petroleum ether/ethyl acetate = 1:1) to afford **4f** as colorless oil (44.1 mg, 74% yield). <sup>1</sup>H NMR (400 MHz, CDCl<sub>3</sub>):  $\delta$  7.32 – 7.26 (m, 2H), 7.21 (d, *J* = 7.2 Hz, 2H), 7.15 – 7.09 (m, 5H), 7.07 – 7.02 (m, 1H), 1.59 (d, *J* = 14.7 Hz, 1H), 1.47 (d, *J* = 14.6 Hz, 1H), 1.37 (s, 3H), 0.00 (s, 3H), -0.05 (s, 3H) ppm. <sup>13</sup>C{<sup>1</sup>H} NMR (100 MHz, CDCl<sub>3</sub>):  $\delta$  183.5, 144.6, 139.5, 133.6, 128.9, 128.4, 127.8, 126.9, 126.0, 48.6, 28.0, 25.4, -1.5, -1.6 ppm. IR (film): 3240, 3067, 3028, 2954, 1703, 1550, 1426, 1248, 1113, 865, 836, 729, 698 cm<sup>-1</sup>. HRMS (ESI): calculated for C<sub>18</sub>H<sub>21</sub>O<sub>2</sub>Si<sup>-</sup> [M-H]<sup>-</sup> 297.1316; found 297.1315.

### 3.2.7 3-(dimethyl(phenyl)silyl)-2-(4-methoxyphenyl)-2-methylpropanoic acid (**4g**)

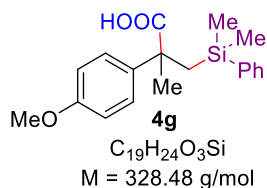

Prepared according to general procedure B from 4-methoxy- $\alpha$ -methyl styrene (29.6 mg, 0.20 mmol, 1.0 equiv.), PhMe<sub>2</sub>SiBpin (63.0 mg, 0.24 mmol, 1.2 equiv.), <sup>t</sup>BuOK (53.8 mg, 0.48 mmol, 2.4 equiv.), stirred for 30 min. Then, the direct bubbling of dry CO<sub>2</sub> through the reaction mixture, stirred at room temperature for 30 s. After the reaction finished, 1M HCl solution (~0.5 mL) was added to the reaction mixture, and the organic phase was separated. The aqueous layer was extracted with EtOAc (3×5 mL). Then, the organic layers were combined, dried over anhydrous sodium sulfate, and filtered. After the removal of the solvent under reduced pressure, the crude material was purified by preparative TLC (petroleum ether/ethyl acetate = 1:1) to afford **4g** as a colorless oil (28.5 mg, 43% yield). <sup>1</sup>H NMR (400 MHz, CDCl<sub>3</sub>):  $\delta$  7.48 – 7.40 (m, 2H), 7.36 – 7.27 (m, 5H), 6.82 (d, *J* = 8.9 Hz, 2H), 3.79 (s, 3H), 1.73 (d, *J* = 14.7 Hz, 1H), 1.64 (d, *J* = 14.7 Hz, 1H), 1.53 (s, 3H), 0.17 (s, 3H), 0.16 (s, 3H) ppm. <sup>13</sup>C{<sup>1</sup>H} NMR

(100 MHz, CDCl<sub>3</sub>): δ 182.0, 158.5, 139.6, 136.7, 133.6, 128.9, 127.7, 127.2, 113.7, 55.3, 47.7, 28.1, 25.4, -1.5, -1.6 ppm. **HRMS** (ESI): calculated for C<sub>19</sub>H<sub>23</sub>O<sub>3</sub>Si<sup>-</sup> [M-H]<sup>-</sup> 327.1422; found 327.1418.

### 3.2.8 3-(dimethyl(phenyl)silyl)-2-methyl-2-(4-(methylthio)phenyl)propanoic acid (**4h**)

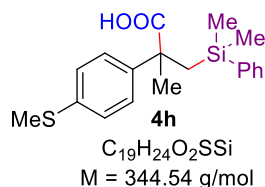

Prepared according to general procedure B from 4-methylthio- $\alpha$ -methyl styrene (32.8 mg, 0.20 mmol, 1.0 equiv.), PhMe<sub>2</sub>SiBpin (63.0 mg, 0.24 mmol, 1.2 equiv.), <sup>t</sup>BuOK (53.8 mg, 0.48 mmol, 2.4 equiv.), stirred for 30 min. Then, the direct bubbling of dry CO<sub>2</sub> through the reaction mixture, stirred at room temperature for 30 s. After the reaction finished, 1M HCl solution (~0.5 mL) was added to the reaction mixture, and the organic phase was separated. The aqueous layer was extracted with EtOAc (3x5 mL). Then, the organic layers were combined, dried over anhydrous sodium sulfate, and filtered. After the removal of the solvent under reduced pressure, the crude material was purified by preparative TLC (petroleum ether/ethyl acetate = 1:1) to afford **4h** as gum (35.2 mg, 51% yield). **<sup>1</sup>H NMR** (400 MHz, CDCl<sub>3</sub>): δ 7.49 – 7.36 (m, 2H), 7.35 – 7.27 (m, 5H), 7.18 (d, *J* = 8.6 Hz, 2H), 2.47 (s, 3H), 1.74 (d, *J* = 14.7 Hz, 1H), 1.63 (d, *J* = 14.7 Hz, 1H), 1.54 (s, 3H), 0.20 (s, 3H), 0.18 (s, 3H) ppm. **<sup>13</sup>C{<sup>1</sup>H} NMR** (100 MHz, CDCl<sub>3</sub>): δ 182.9, 141.4, 139.4, 137.0, 133.5, 128.9, 127.8, 126.6, 126.5, 48.1, 27.9, 25.2, 15.9, -1.5 ppm. **HRMS** (ESI): calculated for C<sub>19</sub>H<sub>23</sub>O<sub>2</sub>SSi<sup>-</sup> [M-H]<sup>-</sup> 343.1194; found 343.1191.

### 3.2.9 3-(dimethyl(phenyl)silyl)-2-methyl-2-(4-morpholinophenyl)propanoic acid (**4i**)

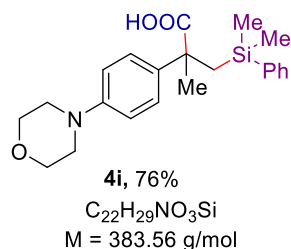

Prepared according to general procedure B from 4-(4-(prop-1-en-2-yl)phenyl)morpholine (40.6 mg, 0.20 mmol, 1.0 equiv.), PhMe<sub>2</sub>SiBpin (63.0 mg, 0.24 mmol, 1.2 equiv.), <sup>t</sup>BuOK (53.8 mg, 0.48 mmol, 2.4 equiv.), stirred for 30 min. The solution was cooled to -20 °C and then the dried CO<sub>2</sub> is added to the reaction mixture through a balloon. The reaction mixture was stirred at -20 °C for 3 min. After the reaction finished, 1M HCl solution (~0.5 mL) was added to the reaction mixture, and the organic phase

was separated. The aqueous layer was extracted with EtOAc (3x5 mL). Then, the organic layers were combined, dried over anhydrous sodium sulfate, and filtered. After the removal of the solvent under reduced pressure, the crude material was purified by preparative TLC (petroleum ether/ethyl acetate = 1:1) to afford **4i** as a colorless oil (58.5 mg, 76% yield). **<sup>1</sup>H NMR** (400 MHz, CDCl<sub>3</sub>): δ 7.51 – 7.39 (m, 2H), 7.36 – 7.26 (m, 5H), 6.83 (d, *J* = 8.7 Hz, 2H), 3.90 – 3.82 (m, 4H), 3.18 – 3.08 (m, 4H), 1.74 (d, *J* = 14.7 Hz, 1H), 1.62 (d, *J* = 14.7 Hz, 1H), 1.53 (s, 3H), 0.19 (s, 3H), 0.18 (s, 3H) ppm. **<sup>13</sup>C{<sup>1</sup>H} NMR** (100 MHz, CDCl<sub>3</sub>): δ 182.7, 149.9, 139.7, 136.1, 133.5, 128.8, 127.7, 126.8, 115.4, 66.9, 49.3, 47.6, 27.8, 25.2, -1.51, -1.52 ppm. **HRMS** (ESI): calculated for C<sub>22</sub>H<sub>28</sub>NO<sub>3</sub>Si<sup>-</sup> [M-H]<sup>-</sup> 382.1844; found 382.1840.

### 3.2.10 3-(dimethyl(phenyl)silyl)-2-methyl-2-(4-(morpholinylsulfonyl)phenyl)propanoic acid (**4j**)

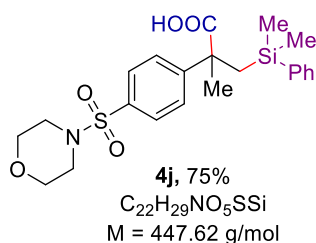

Prepared according to general procedure B from 4-((4-(prop-1-en-2-yl)phenyl)sulfonyl)morpholine (53.4 mg, 0.20 mmol, 1.0 equiv.), PhMe<sub>2</sub>SiBpin (63.0 mg, 0.24 mmol, 1.2 equiv.), <sup>t</sup>BuOK (53.8 mg, 0.48 mmol, 2.4 equiv.), stirred for 30 min. The solution was cooled to -20 °C and then the dried CO<sub>2</sub> is added to the reaction mixture through a balloon. The reaction mixture was stirred at -20 °C for 3 min. After the reaction finished, 1M HCl solution (~0.5 mL) was added to the reaction mixture, and the organic phase was separated. The aqueous layer was extracted with EtOAc (3x5 mL). Then, the organic layers were combined, dried over anhydrous sodium sulfate, and filtered. After the removal of the solvent under reduced pressure, the crude material was purified by preparative TLC (petroleum ether/ethyl acetate = 1:1) to afford **4j** as gum (67.1 mg, 75% yield). **<sup>1</sup>H NMR** (400 MHz, CDCl<sub>3</sub>): δ 7.69 – 7.62 (m, 2H), 7.59 – 7.50 (m, 2H), 7.46 – 7.38 (m, 2H), 7.36 – 7.27 (m, 3H), 5.30 (s, 1H), 3.80 – 3.70 (m, 4H), 3.05 – 2.94 (m, 4H), 1.77 (d, *J* = 14.7 Hz, 1H), 1.65 (d, *J* = 14.7 Hz, 1H), 1.57 (s, 3H), 0.19 (s, 3H), 0.16 (s, 3H) ppm. **<sup>13</sup>C{<sup>1</sup>H} NMR** (100 MHz, CDCl<sub>3</sub>): δ 181.4, 150.1, 138.7, 133.6, 133.5, 129.2, 127.9, 127.9, 127.0, 66.1, 48.9, 46.0, 28.2, 25.2, -1.5 ppm. **HRMS** (ESI): calculated for C<sub>22</sub>H<sub>28</sub>NO<sub>5</sub>SSi<sup>-</sup> [M-H]<sup>-</sup> 446.1463; found 446.1456.

### 3.2.11 3-(dimethyl(phenyl)silyl)-2-methyl-2-(naphthalen-2-yl)propanoic acid (**4k**)



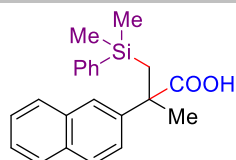

**4k**

$C_{22}H_{24}O_2Si$   
M = 348.52 g/mol

Prepared according to general procedure B from 2-(prop-1-en-2-yl)naphthalene (33.6 mg, 0.20 mmol, 1.0 equiv.),  $PhMe_2SiBpin$  (63.0 mg, 0.24 mmol, 1.2 equiv.),  $tBuOK$  (53.8 mg, 0.48 mmol, 2.4 equiv.), stirred for 30 min. Then, the direct bubbling of dry  $CO_2$  through the reaction mixture, stirred at  $-20\text{ }^\circ C$  for 2 min. After the reaction finished, 1M HCl solution ( $\sim 0.5$  mL) was added to the reaction mixture, and the organic phase was separated. The aqueous layer was extracted with EtOAc ( $3 \times 5$  mL). Then, the organic layers were combined, dried over anhydrous sodium sulfate, and filtered. After the removal of the solvent under reduced pressure, the crude material was purified by preparative TLC (petroleum ether/ethyl acetate = 1:1) to afford **4k** as gum (47.4 mg, 68% yield).  $^1H$  NMR (400 MHz,  $CDCl_3$ ):  $\delta$  7.85 – 7.76 (m, 4H), 7.58 – 7.51 (m, 1H), 7.51 – 7.41 (m, 4H), 7.34 – 7.27 (m, 3H), 1.89 (d,  $J = 14.7$  Hz, 1H), 1.78 (d,  $J = 14.7$  Hz, 1H), 1.68 (s, 3H), 0.22 (s, 3H), 0.19 (s, 3H) ppm.  $^{13}C\{^1H\}$  NMR (100 MHz,  $CDCl_3$ ):  $\delta$  183.3, 142.0, 139.4, 133.6, 133.2, 132.3, 128.9, 128.2, 128.0, 127.7, 127.4, 126.1, 125.9, 124.8, 124.4, 48.8, 27.8, 25.4, -1.50, -1.53 ppm. HRMS (ESI): calculated for  $C_{22}H_{23}O_2Si^-$  [M-H] $^-$  347.1473; found 347.1466.

### 3.2.12 2-((dimethyl(phenyl)silyl)methyl)-2-phenylhexanoic acid (**4l**)

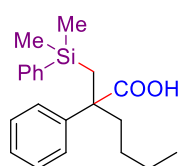

**4l**

$C_{21}H_{28}O_2Si$   
M = 340.54 g/mol

Prepared according to general procedure B from hex-1-en-2-ylbenzene (32.0 mg, 0.20 mmol, 1.0 equiv.),  $PhMe_2SiBpin$  (63.0 mg, 0.24 mmol, 1.2 equiv.),  $tBuOK$  (53.8 mg, 0.48 mmol, 2.4 equiv.), stirred for 30 min. Then, the direct bubbling of dry  $CO_2$  through the reaction mixture, stirred at  $-20\text{ }^\circ C$  for 2 min. After the reaction finished, 1M HCl solution ( $\sim 0.5$  mL) was added to the reaction mixture, and the organic phase was separated. The aqueous layer was extracted with EtOAc ( $3 \times 5$  mL). Then, the organic layers were combined, dried over anhydrous sodium sulfate, and filtered. After the removal of the solvent under reduced pressure, the crude material was purified by preparative TLC (petroleum ether/ethyl acetate = 1:1) to afford **4l** as a colorless oil (47.7 mg, 70% yield).  $^1H$  NMR (400 MHz,

CDCl<sub>3</sub>): δ 7.56 – 7.46 (m, 2H), 7.42 – 7.32 (m, 7H), 7.31 – 7.27 (m, 1H), 2.04 – 1.90 (m, 2H), 1.81 – 1.68 (m, 2H), 1.13 – 1.03 (m, 2H), 1.02 – 0.94 (m, 2H), 0.77 (t, *J* = 7.1 Hz, 3H), 0.22 (s, 3H), 0.12 (s, 3H) ppm. <sup>13</sup>C{<sup>1</sup>H} NMR (100 MHz, CDCl<sub>3</sub>): δ 183.0, 143.8, 139.6, 133.6, 128.9, 128.3, 127.7, 126.9, 126.4, 52.4, 37.1, 26.6, 23.5, 22.9, 14.0, -1.9, -2.1 ppm. HRMS (ESI): calculated for C<sub>21</sub>H<sub>27</sub>O<sub>2</sub>Si<sup>-</sup> [M-H]<sup>-</sup> 339.1786; found 339.1782.

### 3.2.13 2-((dimethyl(phenyl)silyl)methyl)-3-methyl-2-phenylbutanoic acid (**4m**)

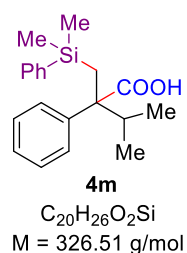

Prepared according to general procedure B from (3-methylbut-1-en-2-yl)benzene (29.2 mg, 0.20 mmol, 1.0 equiv.), PhMe<sub>2</sub>SiBpin (63.0 mg, 0.24 mmol, 1.2 equiv.), <sup>t</sup>BuOK (53.8 mg, 0.48 mmol, 2.4 equiv.), stirred for 30 min. Then, the direct bubbling of dry CO<sub>2</sub> through the reaction mixture, stirred at -20 °C for 2 min. After the reaction finished, 1M HCl solution (~0.5 mL) was added to the reaction mixture, and the organic phase was separated. The aqueous layer was extracted with EtOAc (3x5 mL). Then, the organic layers were combined, dried over anhydrous sodium sulfate, and filtered. After the removal of the solvent under reduced pressure, the crude material was purified by preparative TLC (petroleum ether/ethyl acetate = 1:1) to afford **4m** as a colorless oil (47.0 mg, 72% yield). <sup>1</sup>H NMR (400 MHz, CDCl<sub>3</sub>): δ 7.54 – 7.45 (m, 2H), 7.39 – 7.32 (m, 5H), 7.31 – 7.22 (m, 3H), 2.48 – 7.34 (m, 1H), 1.78 (d, *J* = 14.7 Hz, 1H), 1.55 (d, *J* = 14.8 Hz, 1H), 0.88 (d, *J* = 6.7 Hz, 3H), 0.83 (d, *J* = 6.7 Hz, 3H), 0.22 (s, 3H), 0.03 (s, 3H) ppm. <sup>13</sup>C{<sup>1</sup>H} NMR (100 MHz, CDCl<sub>3</sub>): δ 182.0, 140.8, 140.6, 133.5, 128.6, 128.2, 127.6, 127.5, 126.6, 57.7, 37.4, 24.1, 18.7, 18.4, -1.4, -1.9 ppm. HRMS (ESI): calculated for C<sub>20</sub>H<sub>25</sub>O<sub>2</sub>Si<sup>-</sup> [M-H]<sup>-</sup> 325.1629; found 325.1624.

### 3.2.14 2-cyclohexyl-3-(dimethyl(phenyl)silyl)-2-phenylpropanoic acid (**4n**)

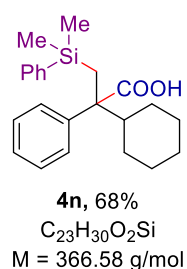

Prepared according to general procedure B from (1-cyclohexylvinyl)benzene (37.2 mg, 0.20 mmol, 1.0 equiv.), PhMe<sub>2</sub>SiBpin (63.0 mg, 0.24 mmol, 1.2 equiv.), <sup>t</sup>BuOK (53.8 mg, 0.48 mmol, 2.4 equiv.), stirred for 30 min. The solution was cooled to -20 °C and then the dried CO<sub>2</sub> is added to the reaction mixture through a balloon. The reaction mixture was stirred at -20 °C for 3 min. After the reaction finished, 1M HCl solution (~0.5 mL) was added to the reaction mixture, and the organic phase was separated. The aqueous layer was extracted with EtOAc (3x5 mL). Then, the organic layers were combined, dried over anhydrous sodium sulfate, and filtered. After the removal of the solvent under reduced pressure, the crude material was purified by preparative TLC (petroleum ether/ethyl acetate = 1:1) to afford **4n** as gum (50.1 mg, 68% yield). <sup>1</sup>H NMR (400 MHz, CDCl<sub>3</sub>): δ 7.55 – 7.45 (m, 2H), 7.36 – 7.22 (m, 8H), 2.01 – 1.91 (m, 1H), 1.88 – 1.76 (m, 2H), 1.74 – 1.54 (m, 5H), 1.20 – 0.94 (m, 3H), 0.92 – 0.75 (m, 2H), 0.22 (s, 3H), 0.01 (s, 3H) ppm. <sup>13</sup>C{<sup>1</sup>H} NMR (100 MHz, CDCl<sub>3</sub>): δ 182.2, 141.0, 140.5, 133.6, 128.7, 128.3, 127.7, 127.5, 126.6, 57.6, 47.6, 29.0, 28.3, 27.0, 26.8, 26.4, 24.4, -1.5, -1.9 ppm. HRMS (ESI): calculated for C<sub>23</sub>H<sub>29</sub>O<sub>2</sub>Si [M-H]<sup>-</sup> 365.1942; found 365.1938.

### 3.2.15 4-((dimethyl(phenyl)silyl)methyl)chromane-4-carboxylic acid (**4o**)

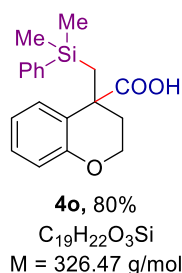

Prepared according to general procedure B from 4-methylenechromane (29.2 mg, 0.20 mmol, 1.0 equiv.), PhMe<sub>2</sub>SiBpin (63.0 mg, 0.24 mmol, 1.2 equiv.), <sup>t</sup>BuOK (53.8 mg, 0.48 mmol, 2.4 equiv.), stirred for 30 min. The solution was cooled to -20 °C and then the dried CO<sub>2</sub> is added to the reaction mixture through a balloon. The reaction mixture was stirred at -20 °C for 3 min. After the reaction finished, 1M HCl solution (~0.5 mL) was added to the reaction mixture, and the organic phase was separated. The aqueous layer was extracted with EtOAc (3x5 mL). Then, the organic layers were combined, dried over anhydrous sodium sulfate, and filtered. After the removal of the solvent under reduced pressure, the crude material was purified by preparative TLC (petroleum ether/ethyl acetate = 1:1) to afford **4o** as gum (52.4 mg, 80% yield). <sup>1</sup>H NMR (400 MHz, CDCl<sub>3</sub>): δ 7.54 (d, *J* = 8.2 Hz, 1H), 7.49 – 7.38 (m, 2H), 7.29 – 7.21 (m, 3H), 7.14 (t, *J* = 7.7 Hz, 1H), 6.90 (t, *J* = 7.4 Hz, 1H), 6.80 (d, *J* = 8.2 Hz, 1H), 4.24 – 4.01 (m, 2H), 2.44 – 2.32 (m, 1H), 1.95 – 1.88 (m, 1H), 1.87 – 1.77 (m, 1H), 1.62 – 1.50 (m, 1H), 0.23 (s, 3H), 0.21 (s, 3H) ppm. <sup>13</sup>C{<sup>1</sup>H} NMR (100 MHz, CDCl<sub>3</sub>): δ 182.1, 154.3, 138.8, 133.5, 129.7, 129.1, 128.6, 127.8, 124.5, 120.5, 117.3, 63.9, 43.9, 32.4, 29.0, -1.5, -1.6 ppm. HRMS (ESI): calculated for C<sub>19</sub>H<sub>21</sub>O<sub>3</sub>Si [M-H]<sup>-</sup> 325.1265; found 325.1258.

### 3.2.16 3-(dimethyl(phenyl)silyl)-2,2-diphenylpropanoic acid (**4p**)

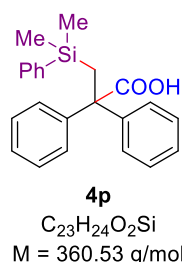

Prepared according to general procedure B from 1,1-diphenylethylene (36.0 mg, 0.20 mmol, 1.0 equiv.),  $PhMe_2SiBpin$  (63.0 mg, 0.24 mmol, 1.2 equiv.),  $tBuOK$  (53.8 mg, 0.48 mmol, 2.4 equiv.), stirred for 30 min. Then, the direct bubbling of dry  $CO_2$  through the reaction mixture, stirred at room temperature for 30 s. After the reaction finished, 1M HCl solution (~0.5 mL) was added to the reaction mixture, and the organic phase was separated. The aqueous layer was extracted with EtOAc (3x5 mL). Then, the organic layers were combined, dried over anhydrous sodium sulfate, and filtered. After the removal of the solvent under reduced pressure, the crude material was purified by preparative TLC (petroleum ether/ethyl acetate = 1:1) to afford **4p** as a colorless oil (59.2 mg, 82% yield).  $^1H$  NMR (400 MHz,  $CDCl_3$ ):  $\delta$  7.49 – 7.44 (m, 2H), 7.44 – 7.36 (m, 4H), 7.35 – 7.31 (m, 5H), 7.31 – 7.26 (m, 4H), 2.14 (s, 2H), 0.00 (s, 6H) ppm.  $^{13}C\{^1H\}$  NMR (100 MHz,  $CDCl_3$ ):  $\delta$  181.0, 144.6, 139.9, 133.7, 128.8, 128.7, 127.9, 127.6, 126.9, 58.3, 28.4, -2.1 ppm. IR (film): 3208, 3069, 3022, 2952, 1705, 1548, 1428, 1242, 1111, 737, 700  $cm^{-1}$ . HRMS (ESI): calculated for  $C_{23}H_{23}O_2Si$   $[M-H]^-$  359.1473; found 359.1470.

### 3.2.17 3-(methyl(diphenyl)silyl)-2,2-diphenylpropanoic acid (**4pa**)

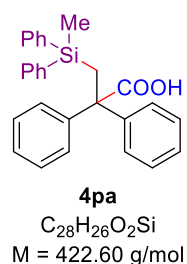

Prepared according to general procedure D from 1,1-diphenylethylene (36.0 mg, 0.20 mmol, 1.0 equiv.),  $Ph_2MeSiLi$  (1.5 equiv.), stirred at room temperature for 30 min. Then, the direct bubbling of dry  $CO_2$  through the reaction mixture, stirred at -20 °C for 2 min. After the reaction finished, 1M HCl solution (~0.5 mL) was added to the reaction mixture, and the organic phase was separated. The aqueous layer was extracted with EtOAc (3x5 mL). Then, the organic layers were combined, dried over anhydrous sodium sulfate, and filtered. After the removal of the solvent under reduced pressure, the

crude material was purified by preparative TLC (petroleum ether/ethyl acetate = 1:1) to afford **4pa** as gum (69.5 mg, 82% yield). **<sup>1</sup>H NMR** (400 MHz, CDCl<sub>3</sub>): δ 7.42 – 7.36 (m, 4H), 7.34 – 7.28 (m, 4H), 7.26 – 7.12 (m, 12H), 2.47 (s, 2H), 0.12 (s, 3H) ppm. **<sup>13</sup>C{<sup>1</sup>H} NMR** (100 MHz, CDCl<sub>3</sub>): δ 180.5, 144.3, 137.4, 134.7, 128.9, 128.8, 127.9, 127.5, 126.9, 58.1, 26.8, -3.8 ppm. **HRMS** (ESI): calculated for C<sub>28</sub>H<sub>25</sub>O<sub>2</sub>Si<sup>-</sup> [M-H]<sup>-</sup> 421.1629; found 421.1625.

### 3.2.18 2,2-diphenyl-3-(triphenylsilyl)propanoic acid (**4pb**)

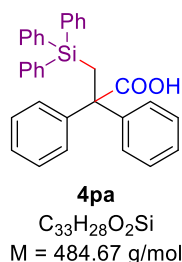

Prepared according to general procedure D from 1,1-diphenylethylene (36.0 mg, 0.20 mmol, 1.0 equiv.), Ph<sub>3</sub>SiLi (1.5 equiv.), stirred at room temperature for 30 min. Then, the direct bubbling of dry CO<sub>2</sub> through the reaction mixture, stirred at -20 °C for 2 min. After the reaction finished, 1M HCl solution (~0.5 mL) was added to the reaction mixture, and the organic phase was separated. The aqueous layer was extracted with EtOAc (3×5 mL). Then, the organic layers were combined, dried over anhydrous sodium sulfate, and filtered. After the removal of the solvent under reduced pressure, the crude material was purified by preparative TLC (petroleum ether/ethyl acetate = 1:1) to afford **4pb** as gum (68.0 mg, 70% yield). **<sup>1</sup>H NMR** (400 MHz, CDCl<sub>3</sub>): δ 7.35 – 7.27 (m, 12H), 7.25 – 7.21 (m, 7H), 7.21 – 7.14 (m, 6H), 2.82 (s, 2H) ppm. **<sup>13</sup>C{<sup>1</sup>H} NMR** (100 MHz, CDCl<sub>3</sub>): δ 179.4, 144.3, 136.1, 135.0, 129.1, 128.9, 127.9, 127.4, 126.9, 58.2, 25.9 ppm. **HRMS** (ESI): calculated for C<sub>33</sub>H<sub>27</sub>O<sub>2</sub>Si<sup>-</sup> [M-H]<sup>-</sup> 483.1786; found 483.1781.

### 3.2.19 2-([1,1'-biphenyl]-4-yl)-3-(dimethyl(phenyl)silyl)-2-phenylpropanoic acid (**4q**)

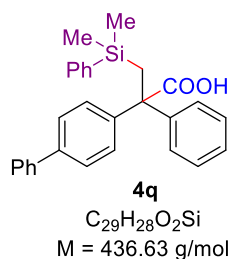

Prepared according to general procedure B from 4-(1-phenylvinyl)-1,1'-biphenyl (51.2 mg, 0.20 mmol, 1.0 equiv.), PhMe<sub>2</sub>SiBpin (63.0 mg, 0.24 mmol, 1.2 equiv.), <sup>t</sup>BuOK (53.8 mg, 0.48 mmol, 2.4 equiv.), stirred for 30 min. Then, the direct bubbling of dry CO<sub>2</sub> through the reaction mixture, stirred at room

temperature for 30 s. After the reaction finished, 1M HCl solution (~0.5 mL) was added to the reaction mixture, and the organic phase was separated. The aqueous layer was extracted with EtOAc (3×5 mL). Then, the organic layers were combined, dried over anhydrous sodium sulfate, and filtered. After the removal of the solvent under reduced pressure, the crude material was purified by preparative TLC (petroleum ether/ethyl acetate = 1:1) to afford **4q** as gum (70.9 mg, 81% yield). **<sup>1</sup>H NMR** (400 MHz, CDCl<sub>3</sub>): δ 7.69 – 7.62 (m, 2H), 7.60 – 7.52 (m, 2H), 7.53 – 7.44 (m, 8H), 7.44 – 7.39 (m, 1H), 7.39 – 7.28 (m, 6H), 2.20 (s, 2H), 0.08 (s, 3H), 0.05 (s, 3H) ppm. **<sup>13</sup>C{<sup>1</sup>H} NMR** (100 MHz, CDCl<sub>3</sub>): δ 181.0, 144.4, 143.6, 140.6, 139.7, 139.6, 133.7, 129.2, 128.8, 128.7, 128.0, 127.5, 127.3, 127.1, 127.0, 126.5, 58.1, 28.4, -1.9, -2.0 ppm. **HRMS** (ESI): calculated for C<sub>29</sub>H<sub>27</sub>O<sub>2</sub>Si [M-H]<sup>-</sup> 435.1786; found 435.1780.

### 3.2.20 3-(dimethyl(phenyl)silyl)-2-(3,4-dimethylphenyl)-2-phenylpropanoic acid (**4r**)

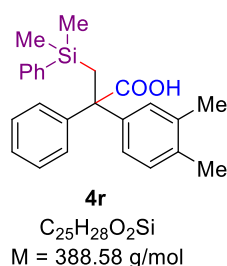

Prepared according to general procedure B from 1,2-dimethyl-4-(1-phenylvinyl)benzene (41.6 mg, 0.20 mmol, 1.0 equiv.), PhMe<sub>2</sub>SiBpin (63.0 mg, 0.24 mmol, 1.2 equiv.), <sup>t</sup>BuOK (53.8 mg, 0.48 mmol, 2.4 equiv.), stirred for 30 min. Then, the direct bubbling of dry CO<sub>2</sub> through the reaction mixture, stirred at room temperature for 30 s. After the reaction finished, 1M HCl solution (~0.5 mL) was added to the reaction mixture, and the organic phase was separated. The aqueous layer was extracted with EtOAc (3×5 mL). Then, the organic layers were combined, dried over anhydrous sodium sulfate, and filtered. After the removal of the solvent under reduced pressure, the crude material was purified by preparative TLC (petroleum ether/ethyl acetate = 1:1) to afford **4r** as gum (59.3 mg, 76% yield). **<sup>1</sup>H NMR** (400 MHz, CDCl<sub>3</sub>): δ 7.46 – 7.42 (m, 2H), 7.40 (d, *J* = 7.0 Hz, 2H), 7.34 – 7.24 (m, 6H), 7.12 (d, *J* = 7.9 Hz, 2H), 7.07 (d, *J* = 7.8 Hz, 1H), 2.28 (s, 3H), 2.23 (s, 3H), 2.18 – 2.06 (m, 2H), 0.05 (s, 3H), -0.01 (s, 3H) ppm. **<sup>13</sup>C{<sup>1</sup>H} NMR** (100 MHz, CDCl<sub>3</sub>): δ 181.0, 144.6, 141.8, 140.0, 136.0, 135.2, 133.6, 129.9, 129.2, 128.8, 128.6, 127.9, 127.5, 126.8, 126.1, 57.9, 28.5, 19.9, 19.3, -1.9, -2.0 ppm. **HRMS** (ESI): calculated for C<sub>25</sub>H<sub>27</sub>O<sub>2</sub>Si [M-H]<sup>-</sup> 387.1786; found 387.1782.

### 3.2.21 3-(dimethyl(phenyl)silyl)-2-(4-methoxyphenyl)-2-phenylpropanoic acid (**4s**)

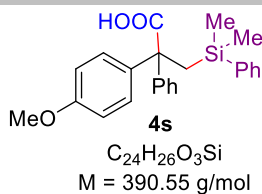

Prepared according to general procedure B from 1-methoxy-4-(1-phenylvinyl)benzene (42.0 mg, 0.20 mmol, 1.0 equiv.),  $PhMe_2SiBpin$  (63.0 mg, 0.24 mmol, 1.2 equiv.),  $tBuOK$  (53.8 mg, 0.48 mmol, 2.4 equiv.), stirred for 30 min. Then, the direct bubbling of dry  $CO_2$  through the reaction mixture, stirred at room temperature for 30 s. After the reaction finished, 1M HCl solution (~0.5 mL) was added to the reaction mixture, and the organic phase was separated. The aqueous layer was extracted with EtOAc (3x5 mL). Then, the organic layers were combined, dried over anhydrous sodium sulfate, and filtered. After the removal of the solvent under reduced pressure, the crude material was purified by preparative TLC (petroleum ether/ethyl acetate = 1:1) to afford **4s** as gum (60.2 mg, 77% yield).  $^1H \text{ NMR}$  (400 MHz,  $CDCl_3$ ):  $\delta$  7.51 – 7.44 (m, 2H), 7.42 – 7.36 (m, 2H), 7.35 – 7.20 (m, 8H), 6.85 (dd,  $J = 9.0, 2.4 \text{ Hz}$ , 2H), 3.84 (s, 3H), 2.19 – 2.05 (m, 2H), 0.03 (s, 3H), 0.00 (s, 3H) ppm.  $^{13}C\{^1H\} \text{ NMR}$  (100 MHz,  $CDCl_3$ ):  $\delta$  181.0, 158.4, 144.7, 139.9, 136.5, 133.7, 129.9, 128.7, 127.9, 127.7, 127.5, 126.9, 113.2, 57.6, 55.2, 28.5, -1.9, -2.0 ppm. **HRMS** (ESI): calculated for  $C_{24}H_{25}O_3Si^- [M-H]^-$  389.1578; found 389.1576.

### 3.2.22 3-(dimethyl(phenyl)silyl)-2-(naphthalen-2-yl)-2-phenylpropanoic acid (**4t**)

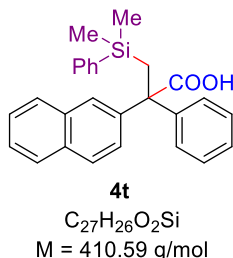

Prepared according to general procedure B from 2-(1-phenylvinyl)naphthalene (46.0 mg, 0.20 mmol, 1.0 equiv.),  $PhMe_2SiBpin$  (63.0 mg, 0.24 mmol, 1.2 equiv.),  $tBuOK$  (53.8 mg, 0.48 mmol, 2.4 equiv.), stirred for 30 min. Then, the direct bubbling of dry  $CO_2$  through the reaction mixture, stirred at room temperature for 30 s. After the reaction finished, 1M HCl solution (~0.5 mL) was added to the reaction mixture, and the organic phase was separated. The aqueous layer was extracted with EtOAc (3x5 mL). Then, the organic layers were combined, dried over anhydrous sodium sulfate, and filtered. After the removal of the solvent under reduced pressure, the crude material was purified by preparative TLC (petroleum ether/ethyl acetate = 1:1) to afford **4t** as gum (64.2 mg, 78% yield).  $^1H \text{ NMR}$  (400 MHz,  $CDCl_3$ ):  $\delta$  7.94 (d,  $J = 2.0 \text{ Hz}$ , 1H), 7.86 – 7.74 (m, 2H), 7.69 (d,  $J = 8.7 \text{ Hz}$ , 1H), 7.54 – 7.44 (m, 2H), 7.43 – 7.36 (m, 4H), 7.34 – 7.27 (m, 4H), 7.26 – 7.16 (m, 3H), 2.27 – 2.16 (m, 2H), -0.01 (s, 3H), -0.05 (s, 3H) ppm.  $^{13}C\{^1H\} \text{ NMR}$  (100 MHz,  $CDCl_3$ ):  $\delta$  180.3, 144.4, 141.6, 139.6, 133.7, 133.6, 132.8, 132.2,

128.8, 128.6, 128.3, 128.0, 127.5, 127.5, 127.5, 127.4, 127.0, 126.1, 126.1, 58.3, 28.3, -2.00, -2.02 ppm. **HRMS** (ESI): calculated for  $C_{27}H_{25}O_2Si^-$   $[M-H]^-$  409.1629; found 409.1623.

### 3.2.23 3-(dimethyl(phenyl)silyl)-2,2-bis(4-methoxyphenyl)propanoic acid (**4u**)

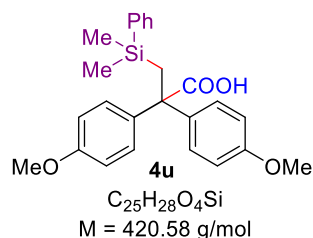

Prepared according to general procedure B from 4,4'-(ethene-1,1-diyl)bis(methoxybenzene) (48.0 mg, 0.20 mmol, 1.0 equiv.),  $PhMe_2SiBpin$  (63.0 mg, 0.24 mmol, 1.2 equiv.),  $tBuOK$  (53.8 mg, 0.48 mmol, 2.4 equiv.), stirred for 30 min. Then, the direct bubbling of dry  $CO_2$  through the reaction mixture, stirred at room temperature for 30 s. After the reaction finished, 1M HCl solution (~0.5 mL) was added to the reaction mixture, and the organic phase was separated. The aqueous layer was extracted with EtOAc (3x5 mL). Then, the organic layers were combined, dried over anhydrous sodium sulfate, and filtered. After the removal of the solvent under reduced pressure, the crude material was purified by preparative TLC (petroleum ether/ethyl acetate = 1:1) to afford **4u** as gum (67.1 mg, 80% yield).  $^1H$  NMR (400 MHz,  $CDCl_3$ ):  $\delta$  7.39 – 7.31 (m, 2H), 7.28 – 7.15 (m, 7H), 6.86 – 6.64 (m, 4H), 3.75 (s, 6H), 2.00 (s, 2H), -0.06 (s, 6H) ppm.  $^{13}C\{^1H\}$  NMR (100 MHz,  $CDCl_3$ ):  $\delta$  181.1, 158.3, 139.9, 136.8, 133.6, 129.8, 128.6, 127.5, 113.2, 56.9, 55.2, 28.6, -1.9 ppm. **HRMS** (ESI): calculated for  $C_{25}H_{27}O_4Si^-$   $[M-H]^-$  419.1684; found 419.1678.

### 3.2.24 2,2-bis(4-(diethylamino)phenyl)-3-(dimethyl(phenyl)silyl)propanoic acid (**4v**)

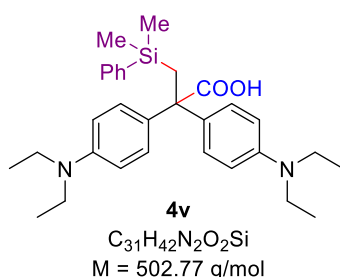

Prepared according to general procedure B from 4,4'-(ethene-1,1-diyl)bis(*N,N*-diethylaniline) (64.5 mg, 0.20 mmol, 1.0 equiv.),  $PhMe_2SiBpin$  (63.0 mg, 0.24 mmol, 1.2 equiv.),  $tBuOK$  (53.8 mg, 0.48 mmol, 2.4 equiv.), stirred for 30 min. Then, the direct bubbling of dry  $CO_2$  through the reaction mixture, stirred at room temperature for 30 s. After the reaction finished, 1M HCl solution (~0.5 mL) was added to the



reaction mixture, and the organic phase was separated. The aqueous layer was extracted with EtOAc (3x5 mL). Then, the organic layers were combined, dried over anhydrous sodium sulfate, and filtered. After the removal of the solvent under reduced pressure, the crude material was purified by preparative TLC (petroleum ether/ethyl acetate = 1:1) to afford **4v** as gum (88.6 mg, 88% yield). **<sup>1</sup>H NMR** (400 MHz, CDCl<sub>3</sub>): δ 7.45 – 7.38 (2, 2H), 7.32 – 7.24 (m, 3H), 7.21 – 7.13 (m, 4H), 6.62 – 6.52 (m, 4H), 3.33 (q, *J* = 7.1 Hz, 8H), 2.01 (s, 2H), 1.15 (t, *J* = 7.1 Hz, 12H), 0.00 (s, 6H) ppm. **<sup>13</sup>C{<sup>1</sup>H} NMR** (100 MHz, CDCl<sub>3</sub>): δ 181.6, 146.4, 140.8, 133.7, 131.9, 129.6, 128.3, 127.4, 111.3, 56.5, 44.4, 28.6, 12.6, -1.8 ppm. **HRMS** (ESI): calculated for C<sub>31</sub>H<sub>41</sub>N<sub>2</sub>O<sub>2</sub>Si<sup>-</sup> [M-H]<sup>-</sup> 501.2943; found 501.2939.

### 3.2.25 9-((dimethyl(phenyl)silyl)methyl)-10,10-dimethyl-9,10-dihydroanthracene-9-carboxylic acid (**4w**)

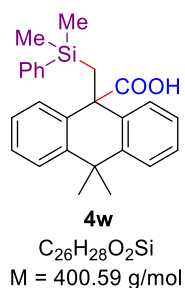

Prepared according to general procedure B from 9,9-dimethyl-10-methylene-9,10-dihydroanthracene (44.0 mg, 0.20 mmol, 1.0 equiv.), PhMe<sub>2</sub>SiBpin (63.0 mg, 0.24 mmol, 1.2 equiv.), <sup>t</sup>BuOK (53.8 mg, 0.48 mmol, 2.4 equiv.), stirred for 30 min. Then, the direct bubbling of dry CO<sub>2</sub> through the reaction mixture, stirred at room temperature for 30 s. After the reaction finished, 1M HCl solution (~0.5 mL) was added to the reaction mixture, and the organic phase was separated. The aqueous layer was extracted with EtOAc (3x5 mL). Then, the organic layers were combined, dried over anhydrous sodium sulfate, and filtered. After the removal of the solvent under reduced pressure, the crude material was purified by preparative TLC (petroleum ether/ethyl acetate = 1:1) to afford **4w** as gum (66.8 mg, 83% yield). **<sup>1</sup>H NMR** (400 MHz, CDCl<sub>3</sub>): δ 7.54 (dd, *J* = 8.3, 1.4 Hz, 2H), 7.34 – 7.29 (m, 4H), 7.25 – 7.21 (m, 1H), 7.20 – 7.11 (m, 6H), 2.14 (s, 2H), 1.81 (s, 3H), 1.61 (s, 3H), -0.52 (s, 6H) ppm. **<sup>13</sup>C{<sup>1</sup>H} NMR** (100 MHz, CDCl<sub>3</sub>): δ 181.39, 142.33, 139.71, 134.31, 133.20, 128.52, 127.90, 127.52, 127.35, 127.28, 126.40, 51.02, 37.38, 36.96, 31.84, 30.27, 24.85, -2.91 ppm. **HRMS** (ESI): calculated for C<sub>26</sub>H<sub>27</sub>O<sub>2</sub>Si<sup>-</sup> [M-H]<sup>-</sup> 399.1786; found 399.1782.

### 3.2.26 9-((dimethyl(phenyl)silyl)methyl)-2,4-diethyl-9H-thioxanthene-9-carboxylic acid (**4x**)

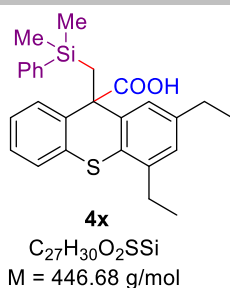

Prepared according to general procedure B from 2,4-diethyl-9-methylene-9*H*-thioxanthene (53.2 mg, 0.20 mmol, 1.0 equiv.), PhMe<sub>2</sub>SiBpin (63.0 mg, 0.24 mmol, 1.2 equiv.), <sup>t</sup>BuOK (53.8 mg, 0.48 mmol, 2.4 equiv.), stirred for 30 min. Then, the direct bubbling of dry CO<sub>2</sub> through the reaction mixture, stirred at room temperature for 30 s. After the reaction finished, 1M HCl solution (~0.5 mL) was added to the reaction mixture, and the organic phase was separated. The aqueous layer was extracted with EtOAc (3×5 mL). Then, the organic layers were combined, dried over anhydrous sodium sulfate, and filtered. After the removal of the solvent under reduced pressure, the crude material was purified by preparative TLC (petroleum ether/ethyl acetate = 1:1) to afford **4x** as gum (57.4 mg, 64% yield). <sup>1</sup>H NMR (400 MHz, CDCl<sub>3</sub>): δ 7.46 – 7.35 (m, 5H), 7.34 – 7.30 (m, 2H), 7.29 – 7.26 (m, 2H), 7.07 (s, 1H), 7.02 (s, 1H), 2.83 (q, *J* = 7.5 Hz, 2H), 2.69 (q, *J* = 7.6 Hz, 2H), 2.04 (s, 2H), 1.39 (t, *J* = 7.5 Hz, 3H), 1.33 (t, *J* = 7.6 Hz, 3H), 0.02 (s, 3H), 0.01 (s, 3H) ppm. <sup>13</sup>C{<sup>1</sup>H} NMR (100 MHz, CDCl<sub>3</sub>): δ 180.4, 141.8, 139.9, 139.3, 135.7, 134.9, 133.4, 130.6, 128.5, 127.8, 127.4, 127.3, 126.9, 126.5, 126.2, 126.0, 125.2, 56.0, 28.7, 28.6, 26.9, 15.7, 14.0, -2.4, -2.5 ppm. HRMS (ESI): calculated for C<sub>27</sub>H<sub>29</sub>O<sub>2</sub>SSi<sup>-</sup> [M-H]<sup>-</sup> 445.1663; found 445.1660.

### 3.2.27 9-((dimethyl(phenyl)silyl)methyl)-9*H*-fluorene-9-carboxylic acid (**4y**)

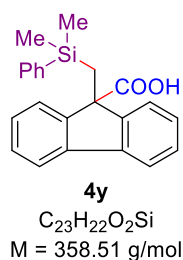

Prepared according to general procedure B from 9-methylene-9*H*-fluorene (35.6 mg, 0.20 mmol, 1.0 equiv.), PhMe<sub>2</sub>SiBpin (63.0 mg, 0.24 mmol, 1.2 equiv.), <sup>t</sup>BuOK (53.8 mg, 0.48 mmol, 2.4 equiv.), stirred for 30 min. The solution was cooled to -20 °C and then the dried CO<sub>2</sub> was added to the reaction mixture through a balloon. The reaction mixture was stirred at -20 °C for 3 min. After the reaction finished, 1M HCl solution (~0.5 mL) was added to the reaction mixture, and the organic phase was separated. The aqueous layer was extracted with EtOAc (3×5 mL). Then, the organic layers were combined, dried over anhydrous sodium sulfate, and filtered. After the removal of the solvent under

reduced pressure, the crude material was purified by preparative TLC (petroleum ether/ethyl acetate = 1:1) to afford **4y** as gum (48.7 mg, 68% yield).  $^1\text{H NMR}$  (400 MHz,  $\text{CDCl}_3$ ):  $\delta$  7.67 (d,  $J = 7.5$  Hz, 2H), 7.46 (d,  $J = 7.7$  Hz, 2H), 7.35 (td,  $J = 7.5, 1.1$  Hz, 2H), 7.21 (dd,  $J = 7.5, 1.1$  Hz, 2H), 7.19 – 7.17 (m, 1H), 7.16 – 7.14 (m, 1H), 7.12 – 7.06 (m, 2H), 2.11 (s, 2H), -0.50 (s, 6H) ppm.  $^{13}\text{C}\{^1\text{H}\}$  NMR (100 MHz,  $\text{CDCl}_3$ ):  $\delta$  179.9, 145.6, 140.8, 139.1, 133.1, 128.6, 128.4, 127.5, 127.6, 125.4, 120.0, 58.6, 25.0, -2.9 ppm. HRMS (ESI): calculated for  $\text{C}_{23}\text{H}_{21}\text{O}_2\text{Si}^-$  [M-H] $^-$  357.1316; found 357.1310.

### 3.2.28 3-(dimethyl(phenyl)silyl)-2-phenylbutanoic acid (**4za**)

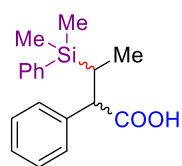

**4za**

$\text{C}_{18}\text{H}_{22}\text{O}_2\text{Si}$   
M = 298.46 g/mol

Prepared according to general procedure B from  $\beta$ -methylstyrene (23.6 mg, 0.20 mmol, 1.0 equiv.),  $\text{PhMe}_2\text{SiBpin}$  (63.0 mg, 0.24 mmol, 1.2 equiv.),  $t\text{BuOK}$  (53.8 mg, 0.48 mmol, 2.4 equiv.), stirred at  $-20$   $^\circ\text{C}$  for 2 min. Then, the direct bubbling of dry  $\text{CO}_2$  through the reaction mixture, stirred at room temperature for 30 s. After the reaction finished, 1M HCl solution ( $\sim 0.5$  mL) was added to the reaction mixture, and the organic phase was separated. The aqueous layer was extracted with EtOAc (3 $\times$ 5 mL). Then, the organic layers were combined, dried over anhydrous sodium sulfate, and filtered. After the removal of the solvent under reduced pressure, the crude material was purified by preparative TLC (petroleum ether/ethyl acetate = 1:1) to afford **4za** as gum (33.4 mg, 56% yield, d.r.=1:1).  $^1\text{H NMR}$  (400 MHz,  $\text{CDCl}_3$ ):  $\delta$  7.41 – 7.38 (m, 2H), 7.37 – 7.31 (m, 5H), 7.30 – 7.27 (m, 3H), 3.45 (d,  $J = 11.8$  Hz, 1H), 1.86 (dq,  $J = 11.7, 7.3$  Hz, 1H), 1.11 (d,  $J = 7.3$  Hz, 3H), 0.03 (s, 3H), -0.05 (s, 3H) ppm.  $^{13}\text{C}\{^1\text{H}\}$  NMR (100 MHz,  $\text{CDCl}_3$ ):  $\delta$  180.3, 138.0, 137.8, 133.9, 129.1, 128.9, 128.5, 127.8, 127.6, 55.4, 24.3, 14.7, -3.1, -4.7 ppm. HRMS (ESI): calculated for  $\text{C}_{18}\text{H}_{21}\text{O}_2\text{Si}^-$  [M-H] $^-$  297.1316; found 297.1315.

### 3.2.29 3-(dimethyl(phenyl)silyl)-2-phenylpentanoic acid (**4zb**)

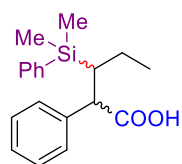

**4zb**

$\text{C}_{19}\text{H}_{24}\text{O}_2\text{Si}$   
M = 312.48 g/mol

Prepared according to general procedure B from  $\beta$ -ethylstyrene (26.4 mg, 0.20 mmol, 1.0 equiv.),  $\text{PhMe}_2\text{SiBpin}$  (63.0 mg, 0.24 mmol, 1.2 equiv.),  $t\text{BuOK}$  (53.8 mg, 0.48 mmol, 2.4 equiv.), stirred for 30 min. Then, the direct bubbling of dry  $\text{CO}_2$  through the reaction mixture, stirred at  $-20\text{ }^\circ\text{C}$  for 2 min. After the reaction finished, 1M HCl solution ( $\sim 0.5\text{ mL}$ ) was added to the reaction mixture, and the organic phase was separated. The aqueous layer was extracted with EtOAc ( $3\times 5\text{ mL}$ ). Then, the organic layers were combined, dried over anhydrous sodium sulfate, and filtered. After the removal of the solvent under reduced pressure, the crude material was purified by preparative TLC (petroleum ether/ethyl acetate = 1:1) to afford **4zb** as a colorless oil (34.6 mg, 55% yield, d.r.=1:1).  $^1\text{H NMR}$  (400 MHz,  $\text{CDCl}_3$ ):  $\delta$  7.50 – 7.44 (m, 2H), 7.34 – 7.26 (m, 5H), 7.22 – 7.15 (m, 2H), 7.14 – 7.06 (m, 1H), 3.57 (d,  $J = 11.3\text{ Hz}$ , 1H), 1.74 (dt,  $J = 11.0, 5.4\text{ Hz}$ , 1H), 1.35 – 1.17 (m, 2H), 0.63 (t,  $J = 7.4\text{ Hz}$ , 3H), 0.33 (s, 3H), 0.31 (s, 3H) ppm.  $^{13}\text{C}\{^1\text{H}\}\text{ NMR}$  (100 MHz,  $\text{CDCl}_3$ ):  $\delta$  180.7, 138.8, 137.6, 133.7, 129.4, 128.6, 128.3, 127.7, 127.6, 53.4, 31.3, 22.8, 13.2, -2.3, -3.2 ppm. **HRMS** (ESI): calculated for  $\text{C}_{19}\text{H}_{23}\text{O}_2\text{Si}^-$  [ $\text{M}-\text{H}$ ] $^-$  311.1473; found 311.1469.

### 3.2.30 2-(dimethyl(phenyl)silyl)-1,2,3,4-tetrahydronaphthalene-1-carboxylic acid (**4zc**)

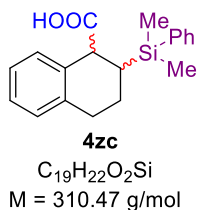

Prepared according to general procedure B from 1,2-dihydronaphthalene (26.0 mg, 0.20 mmol, 1.0 equiv.),  $\text{PhMe}_2\text{SiBpin}$  (63.0 mg, 0.24 mmol, 1.2 equiv.),  $t\text{BuOK}$  (53.8 mg, 0.48 mmol, 2.4 equiv.), stirred for 30 min. Then, the direct bubbling of dry  $\text{CO}_2$  through the reaction mixture, stirred at room temperature for 30 s. After the reaction finished, 1M HCl solution ( $\sim 0.5\text{ mL}$ ) was added to the reaction mixture, and the organic phase was separated. The aqueous layer was extracted with EtOAc ( $3\times 5\text{ mL}$ ). Then, the organic layers were combined, dried over anhydrous sodium sulfate, and filtered. After the removal of the solvent under reduced pressure, the crude material was purified by preparative TLC (petroleum ether/ethyl acetate = 1:1) to afford **4zc** as a colorless oil (37.8 mg, 61% yield).  $^1\text{H NMR}$  (400 MHz,  $\text{CDCl}_3$ ):  $\delta$  10.1 (s, 1H), 7.70 – 7.62 (m, 2H), 7.50 – 7.40 (m, 3H), 7.39 – 7.34 (m, 1H), 7.30 – 7.24 (m, 2H), 7.21 – 7.15 (m, 1H), 3.93 (d,  $J = 7.8\text{ Hz}$ , 1H), 2.96 – 2.80 (m, 2H), 2.22 – 2.12 (m, 1H), 1.98 – 1.90 (m, 1H), 1.68 – 1.58 (m, 1H), 0.42 (s, 3H), 0.41 (s, 3H) ppm.  $^{13}\text{C}\{^1\text{H}\}\text{ NMR}$  (100 MHz,  $\text{CDCl}_3$ ):  $\delta$  181.8, 137.9, 137.1, 134.1, 133.1, 129.4, 129.2, 128.6, 127.8, 127.0, 126.1, 46.2, 29.7, 24.4, 22.5, -4.2, -4.6 ppm. **HRMS** (ESI): calculated for  $\text{C}_{19}\text{H}_{21}\text{O}_2\text{Si}^-$  [ $\text{M}-\text{H}$ ] $^-$  309.1316; found 309.1319.

### 3.2.31 3-(dimethyl(phenyl)silyl)-2,3-diphenylpropanoic acid (**4zd**)

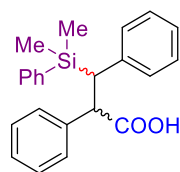

**4zd**

$C_{23}H_{24}O_2Si$   
M = 360.53 g/mol

Prepared according to general procedure B from (*E*)-1,2-diphenylethene (36.0 mg, 0.20 mmol, 1.0 equiv.),  $PhMe_2SiBpin$  (63.0 mg, 0.24 mmol, 1.2 equiv.),  $tBuOK$  (53.8 mg, 0.48 mmol, 2.4 equiv.), stirred for 30 min. The solution was cooled to  $-20\text{ }^\circ C$  and then the dried  $CO_2$  was added to the reaction mixture through a balloon. The reaction mixture was stirred at  $-20\text{ }^\circ C$  for 3 min. After the reaction finished, 1M HCl solution ( $\sim 0.5\text{ mL}$ ) was added to the reaction mixture, and the organic phase was separated. The aqueous layer was extracted with EtOAc ( $3 \times 5\text{ mL}$ ). Then, the organic layers were combined, dried over anhydrous sodium sulfate, and filtered. After the removal of the solvent under reduced pressure, the crude material was purified by preparative TLC (petroleum ether/ethyl acetate = 1:1) to afford **4zd** as gum (37.7 mg, 52% yield).  $^1H\text{ NMR}$  (400 MHz,  $CDCl_3$ ):  $\delta$  7.38 – 7.33 (m, 2H), 7.22 – 7.18 (m, 2H), 7.14 – 7.09 (m, 2H), 7.09 – 7.02 (m, 3H), 7.02 – 6.83 (m, 4H), 6.72 (d,  $J = 7.0\text{ Hz}$ , 2H), 4.06 (d,  $J = 12.7\text{ Hz}$ , 1H), 3.26 (d,  $J = 12.7\text{ Hz}$ , 1H), 0.26 (s, 3H), 0.20 (s, 3H) ppm.  $^{13}C\{^1H\}\text{ NMR}$  (100 MHz,  $CDCl_3$ ):  $\delta$  179.1, 139.8, 137.9, 136.3, 134.4, 129.3, 129.1, 129.0, 128.1, 127.7, 127.4, 127.1, 124.6, 52.1, 38.6, -2.9, -4.6 ppm. **HRMS** (ESI): calculated for  $C_{23}H_{23}O_2Si^-$  [M-H] $^-$  359.1473; found 359.1469.

### 3.2.32 3-(dimethyl(phenyl)silyl)-3-methyl-2-phenylbutanoic acid (**4ze**)

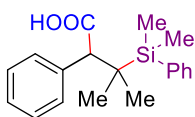

**4ze**

$C_{19}H_{24}O_2Si$   
M = 312.48 g/mol

Prepared according to general procedure B from  $\beta$ -dimethylstyrene (26.4 mg, 0.20 mmol, 1.0 equiv.),  $PhMe_2SiBpin$  (63.4 mg, 0.24 mmol, 1.2 equiv.),  $tBuOK$  (53.8 mg, 0.48 mmol, 2.4 equiv.), stirred for 30 min. Then, the direct bubbling of dry  $CO_2$  through the reaction mixture, stirred at  $-20\text{ }^\circ C$  for 2 min. After the reaction finished, 1M HCl solution ( $\sim 0.5\text{ mL}$ ) was added to the reaction mixture, and the organic phase was separated. The aqueous layer was extracted with EtOAc ( $3 \times 5\text{ mL}$ ). Then, the organic layers were combined, dried over anhydrous sodium sulfate, and filtered. After the removal of the solvent under reduced pressure, the crude material was purified by preparative TLC (petroleum ether/ethyl

acetate = 1:1) to afford **4ze** as gum (28.3 mg, 45% yield).  $^1\text{H NMR}$  (400 MHz,  $\text{CDCl}_3$ ):  $\delta$  7.55 – 7.46 (m, 2H), 7.40 – 7.34 (m, 2H), 7.32 – 7.27 (m, 6H), 3.59 (s, 1H), 1.17 (s, 3H), 0.94 (s, 3H), 0.27 (s, 3H), 0.20 (s, 3H) ppm.  $^{13}\text{C}\{^1\text{H}\}$  NMR (100 MHz,  $\text{CDCl}_3$ ):  $\delta$  179.2, 137.1, 135.3, 134.8, 130.6, 129.1, 127.9, 127.5, 127.5, 56.9, 24.6, 21.8, 21.0, -4.6, -5.0 ppm. HRMS (ESI): calculated for  $\text{C}_{19}\text{H}_{23}\text{O}_2\text{Si}^-$  [M-H] $^-$  311.1473; found 311.1468.

### 3.2.33 2-(dimethyl(phenyl)silyl)-1-phenylcyclohexane-1-carboxylic acid (**4zf**)

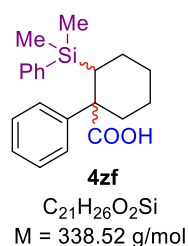

Prepared according to general procedure B from (*E*)-1,2-diphenylethene (36.0 mg, 0.20 mmol, 1.0 equiv.),  $\text{PhMe}_2\text{SiBpin}$  (63.0 mg, 0.24 mmol, 1.2 equiv.),  $t\text{BuOK}$  (53.8 mg, 0.48 mmol, 2.4 equiv.), stirred for 30 min. Then, the direct bubbling of dry  $\text{CO}_2$  through the reaction mixture, stirred at  $-20\text{ }^\circ\text{C}$  for 2 min. After the reaction finished, 1M HCl solution ( $\sim$ 0.5 mL) was added to the reaction mixture, and the organic phase was separated. The aqueous layer was extracted with EtOAc (3x5 mL). Then, the organic layers were combined, dried over anhydrous sodium sulfate, and filtered. After the removal of the solvent under reduced pressure, the crude material was purified by preparative TLC (petroleum ether/ethyl acetate = 1:1) to afford **4zf** as a colorless oil (28.7 mg, 42% yield).  $^1\text{H NMR}$  (400 MHz,  $\text{CDCl}_3$ ):  $\delta$  7.48 – 7.41 (m, 2H), 7.41 – 7.32 (m, 2H), 7.32 – 7.30 (m, 3H), 7.30 – 7.25 (m, 3H), 2.59 (dd,  $J = 12.6, 3.1$  Hz, 1H), 2.53 (d,  $J = 3.3$  Hz, 1H), 2.04 (td,  $J = 12.8, 3.8$  Hz, 1H), 1.96 (dt,  $J = 13.1, 3.3$  Hz, 1H), 1.87 (dt,  $J = 7.7, 2.9$  Hz, 2H), 1.61 (dd,  $J = 9.8, 6.3$  Hz, 1H), 1.53 (d,  $J = 13.2$  Hz, 1H), 1.37 (s, 1H), 0.22 (s, 3H) ppm.  $^{13}\text{C}\{^1\text{H}\}$  NMR (100 MHz,  $\text{CDCl}_3$ ):  $\delta$  180.9, 141.8, 140.0, 133.6, 128.4, 128.3, 127.5, 126.9, 126.2, 53.5, 32.6, 29.8, 27.0, 24.1, 23.4, -0.38, -0.74 ppm. HRMS (ESI): calculated for  $\text{C}_{21}\text{H}_{25}\text{O}_2\text{Si}^-$  [M-H] $^-$  337.1629; found 337.1632.

### 3.2.34 3-(dimethyl(phenyl)silyl)-2-(4-isobutylphenyl)propanoic acid (**5a**)

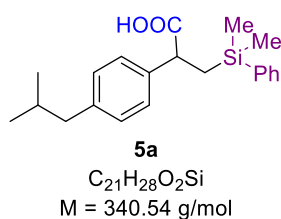

Prepared according to general procedure B from 1-isobutyl-4-vinylbenzene (32.5 mg, 0.20 mmol, 1.0 equiv.), PhMe<sub>2</sub>SiBpin (52.8 mg, 0.20 mmol, 1.0 equiv.), <sup>t</sup>BuOK (44.9 mg, 0.40 mmol, 2.0 equiv.), stirred for 30 min. The solution was cooled to -20 °C and then the dried CO<sub>2</sub> was added to the reaction mixture through a balloon. The reaction mixture was stirred at -20 °C for 3 min. After the reaction finished (The reaction solution gradually fades), 1M HCl solution (~0.5 mL) was added to the reaction mixture, and the organic phase was separated. The aqueous layer was extracted with EtOAc (3×5 mL). Then, the organic layers were combined, dried over anhydrous sodium sulfate, and filtered. After the removal of the solvent under reduced pressure, the crude material was purified by preparative TLC (petroleum ether/ethyl acetate = 1:1) to afford **5a** as gum (49.0 mg, 72% yield). <sup>1</sup>H NMR (400 MHz, CDCl<sub>3</sub>): δ 7.47 – 7.35 (m, 2H), 7.33 – 7.27 (m, 3H), 7.19 – 7.12 (m, 2H), 7.08 – 7.01 (m, 2H), 3.60 – 3.52 (m, 1H), 2.43 (d, *J* = 7.2 Hz, 2H), 1.89 – 1.76 (m, 1H), 1.61 (dd, *J* = 14.8, 7.2 Hz, 1H), 1.37 (dd, *J* = 14.8, 8.6 Hz, 1H), 0.88 (d, *J* = 6.6 Hz, 6H), 0.11 (d, *J* = 2.0 Hz, 6H) ppm. <sup>13</sup>C{<sup>1</sup>H} NMR (100 MHz, CDCl<sub>3</sub>): δ 180.2, 141.0, 138.3, 137.3, 133.6, 129.3, 129.1, 127.8, 127.8, 46.7, 45.1, 30.2, 22.4, 22.4, 20.4, -2.7, -3.1 ppm. HRMS (ESI): calculated for C<sub>21</sub>H<sub>27</sub>O<sub>2</sub>Si<sup>-</sup> [M-H]<sup>-</sup> 339.1786; found 339.1780.

### 3.2.35 3-(dimethyl(phenyl)silyl)-2-(4-isobutylphenyl)-2-methylpropanoic acid (**5b**)

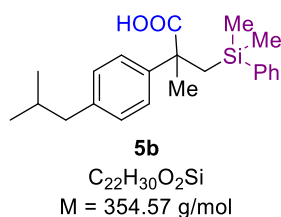

Prepared according to general procedure B from 2-methoxy-6-(prop-1-en-2-yl)naphthalene (34.9 mg, 0.20 mmol, 1.0 equiv.), PhMe<sub>2</sub>SiBpin (63.0 mg, 0.24 mmol, 1.2 equiv.), <sup>t</sup>BuOK (53.8 mg, 0.48 mmol, 2.4 equiv.), stirred for 30 min. The solution was cooled to -20 °C and then the dried CO<sub>2</sub> was added to the reaction mixture through a balloon. The reaction mixture was stirred at -20 °C for 3 min. After the reaction finished (The reaction solution gradually fades), 1M HCl solution (~0.5 mL) was added to the reaction mixture, and the organic phase was separated. The aqueous layer was extracted with EtOAc (3×5 mL). Then, the organic layers were combined, dried over anhydrous sodium sulfate, and filtered. After the removal of the solvent under reduced pressure, the crude material was purified by preparative TLC (petroleum ether/ethyl acetate = 1:1) to afford **5b** as gum (65.5 mg, 92% yield). <sup>1</sup>H NMR (400 MHz, CDCl<sub>3</sub>): δ 7.55 – 7.45 (m, 2H), 7.40 – 7.26 (m, 5H), 7.16 – 7.02 (m, 2H), 2.48 (d, *J* = 6.6 Hz, 2H), 1.96 – 1.84 (m, 1H), 1.82 – 1.72 (m, 1H), 1.72 – 1.62 (m, 1H), 1.56 (s, 3H), 0.99 – 0.87 (m, 6H), 0.25 – 0.02 (m, 6H) ppm. <sup>13</sup>C{<sup>1</sup>H} NMR (100 MHz, CDCl<sub>3</sub>): δ 183.5, 141.9, 140.3, 139.7, 133.6, 129.1, 128.9, 127.7, 125.8, 48.2, 45.0, 30.2, 28.1, 25.3, 22.4, -1.5, -1.6 ppm. HRMS (ESI): calculated for C<sub>22</sub>H<sub>29</sub>O<sub>2</sub>Si<sup>-</sup> [M-H]<sup>-</sup> 353.1942; found 353.1935.

### 3.2.36 3-(dimethyl(phenyl)silyl)-2-(6-methoxynaphthalen-2-yl)-2-methylpropanoic acid (**5c**)

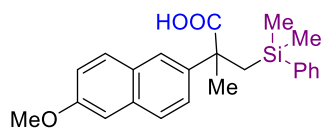

**5c**

$C_{23}H_{26}O_3Si$   
M = 378.54 g/mol

Prepared according to general procedure B from 2-methoxy-6-(prop-1-en-2-yl)naphthalene (40.0 mg, 0.20 mmol, 1.0 equiv.),  $PhMe_2SiBpin$  (63.0 mg, 0.24 mmol, 1.2 equiv.),  $tBuOK$  (53.8 mg, 0.48 mmol, 2.4 equiv.), stirred for 30 min. The solution was cooled to  $-20\text{ }^\circ\text{C}$  and then the dried  $CO_2$  was added to the reaction mixture through a balloon. The reaction mixture was stirred at  $-20\text{ }^\circ\text{C}$  for 3 min. After the reaction finished, 1M HCl solution ( $\sim 0.5\text{ mL}$ ) was added to the reaction mixture, and the organic phase was separated. The aqueous layer was extracted with EtOAc ( $3 \times 5\text{ mL}$ ). Then, the organic layers were combined, dried over anhydrous sodium sulfate, and filtered. After the removal of the solvent under reduced pressure, the crude material was purified by preparative TLC (petroleum ether/ethyl acetate = 1:1) to afford **5c** as gum (49.2 mg, 65% yield).  $^1H\text{ NMR}$  (400 MHz,  $CDCl_3$ ):  $\delta$  7.78 – 7.73 (m, 1H), 7.72 – 7.64 (m, 2H), 7.54 – 7.49 (m, 1H), 7.48 – 7.40 (m, 2H), 7.34 – 7.27 (m, 3H), 7.34 – 7.27 (m, 3H), 7.34 – 7.27 (m, 3H), 7.17 (dd,  $J = 8.9, 2.5\text{ Hz}$ , 1H), 7.12 (d,  $J = 2.5\text{ Hz}$ , 1H), 3.94 (s, 3H), 1.88 (d,  $J = 14.7\text{ Hz}$ , 1H), 1.77 (d,  $J = 14.7\text{ Hz}$ , 1H), 1.66 (s, 3H), 0.21 (s, 3H), 0.18 (s, 3H) ppm.  $^{13}C\{^1H\}\text{ NMR}$  (100 MHz,  $CDCl_3$ ):  $\delta$  182.8, 157.8, 139.7, 139.5, 133.6, 133.4, 129.7, 128.9, 128.7, 127.7, 126.9, 125.3, 124.3, 118.9, 105.5, 55.3, 48.5, 27.9, 25.4, -1.5, -1.6 ppm. **HRMS** (ESI): calculated for  $C_{23}H_{25}O_3Si^-$  [M-H] $^-$  377.1578; found 377.1572.



---

## 4. Computational Investigations

### 4.1 Computational Details

All calculations were performed with the Gaussian 16 package<sup>[5]</sup>. The 3D structures of the optimized species were generated using CYLview<sup>[6]</sup>. Geometry optimizations were performed at M06-2X<sup>[7]</sup>/6-31G(d,p) (def2-TZVP for K atoms) level of theory in conjugation with the polarizable continuum model (PCM)<sup>[8]</sup> solvation model for tetrahydrofuran. Vibrational frequencies were calculated for all the geometries to provide thermal corrections to the Gibbs free energies at 298.15 K and 1.0 atm, and to confirm whether the optimized geometry corresponds to a minimum or a transition state (TS). Intrinsic reaction coordinate (IRC) calculations were performed to verify whether a TS connects the correct minimum structures. To get more accurate energies, single-point energy calculations were done with the same functional and solvation model using the cc-pVTZ basis set (def2-QZVP for K atom). Free energy barriers here are defined as the free energy difference between the transition state and the lowest-energy stationary point before it along the reaction pathways.

NOTE: The crystallographic evidence from reported benzyl potassium-THF complexes reveals that the potassium ion in benzyl potassium adopts a distinctive sandwich-like acoordinate geometry, interacting simultaneously with the aromatic ring and THF molecules.<sup>[9-10]</sup> Guided by this structural insight, we employed THF as the coordination solvent for potassium ions (as shown in Figure S18-S19) and recalculated the complete potential energy surface for the <sup>t</sup>BuOK-mediated selective 1,2-silacarboxylation of arylalkenes. Notably, the additional computational results are in excellent agreement with those obtained from the simplified model. To facilitate reader reference, we have incorporated both sets of computational results into the revised ESI (see Figures S16-S19 for details).

## 4.2 DFT Calculations on the <sup>t</sup>BuOK-Mediated 1,2-Silylcarboxylation of Arylalkenes

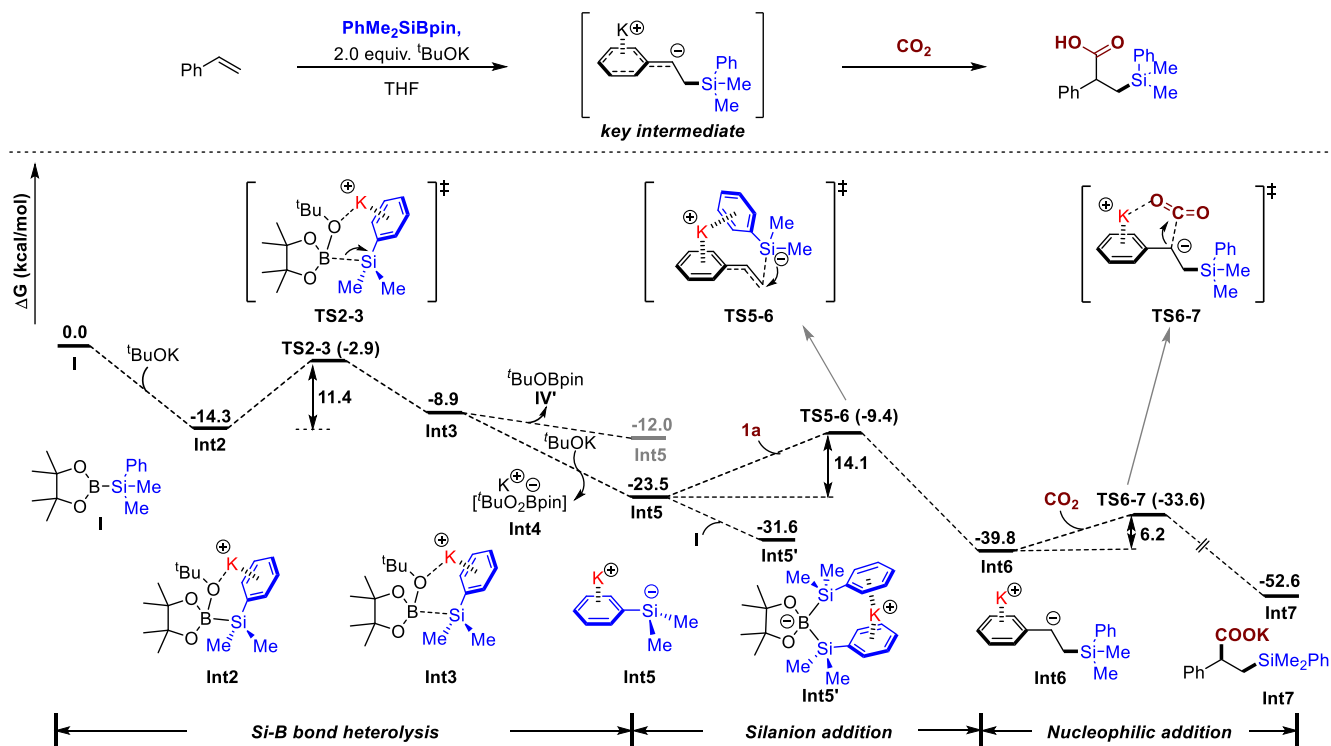

**Figure S16.** Gibbs free energy profile for the <sup>t</sup>BuOK-mediated selective 1,2-silylcarboxylation reaction of styrene.

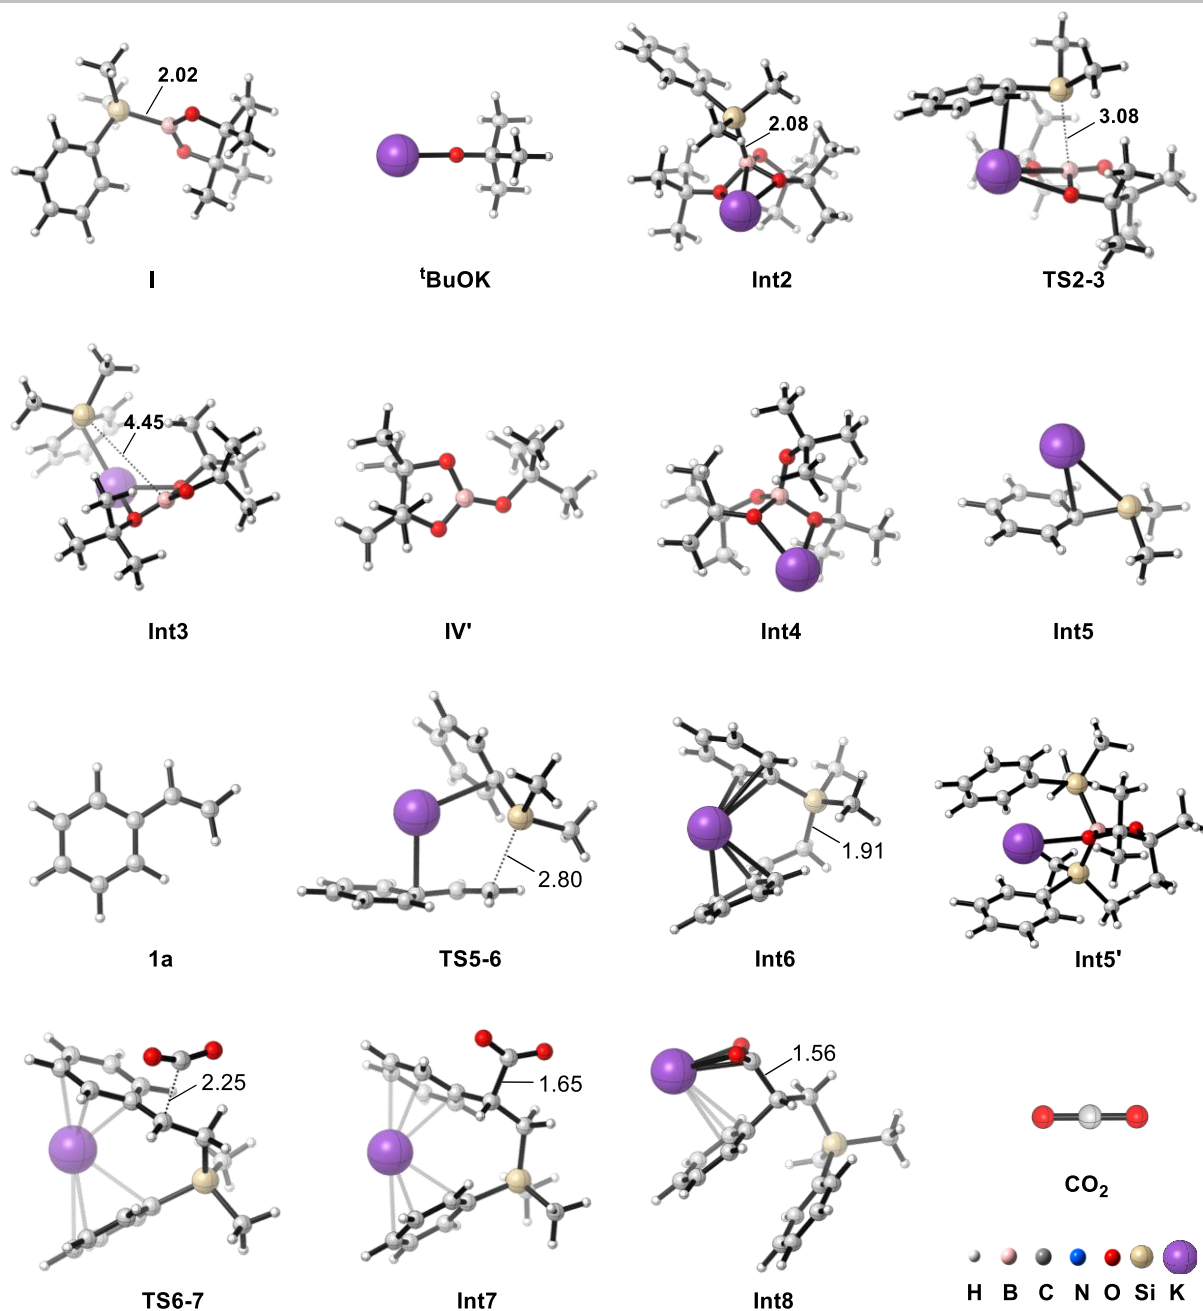

**Figure S17.** 3D structures of the species involved in the <sup>t</sup>BuOK-mediated selective 1,2-silylcarboxylation reaction of styrene. Selected distances were shown in Å.

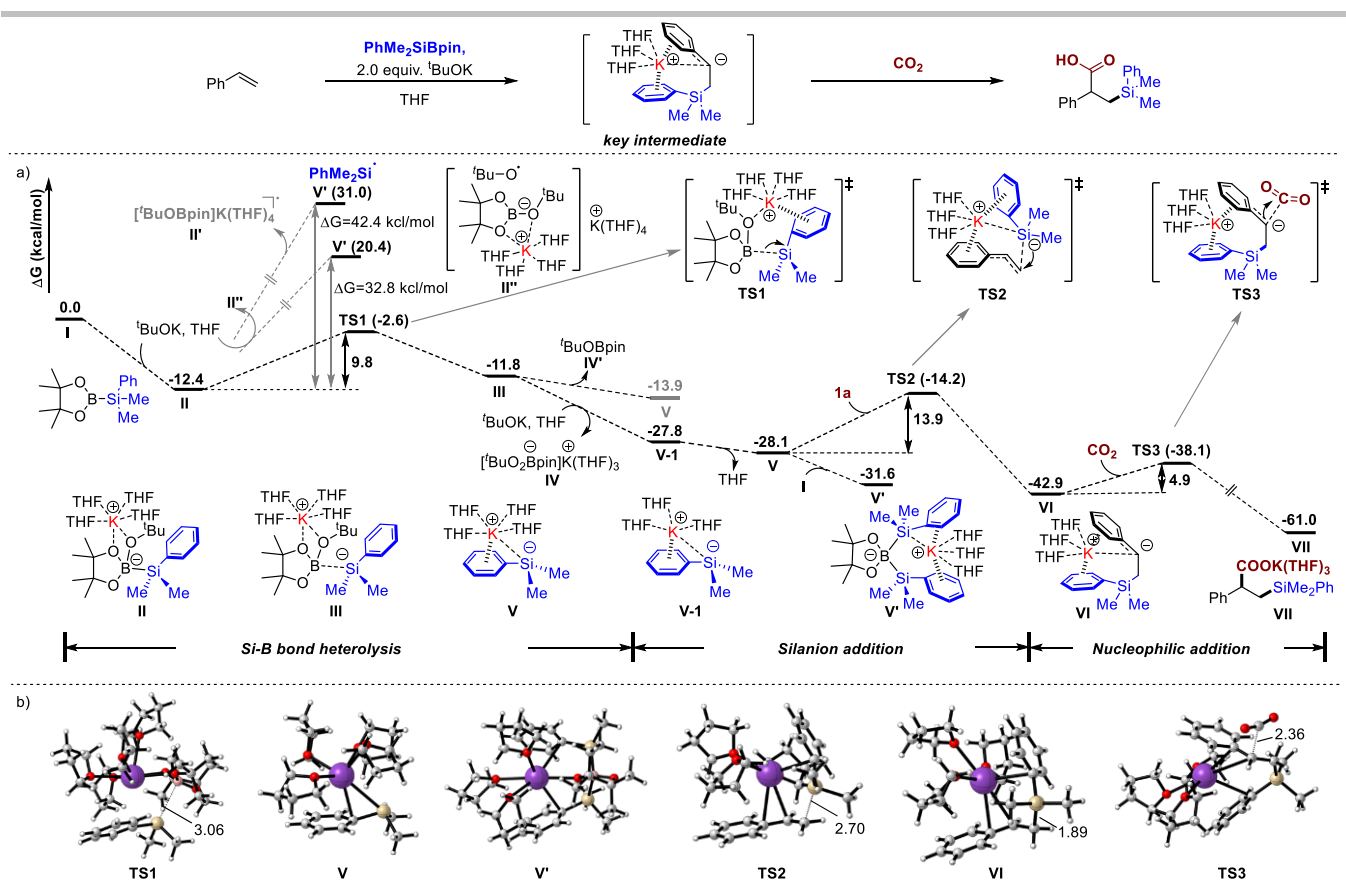

**Figure S18.** Gibbs free energy profile for the  $t\text{BuOK}$ -mediated selective 1,2-silylcarboxylation reaction of styrene (with THF).

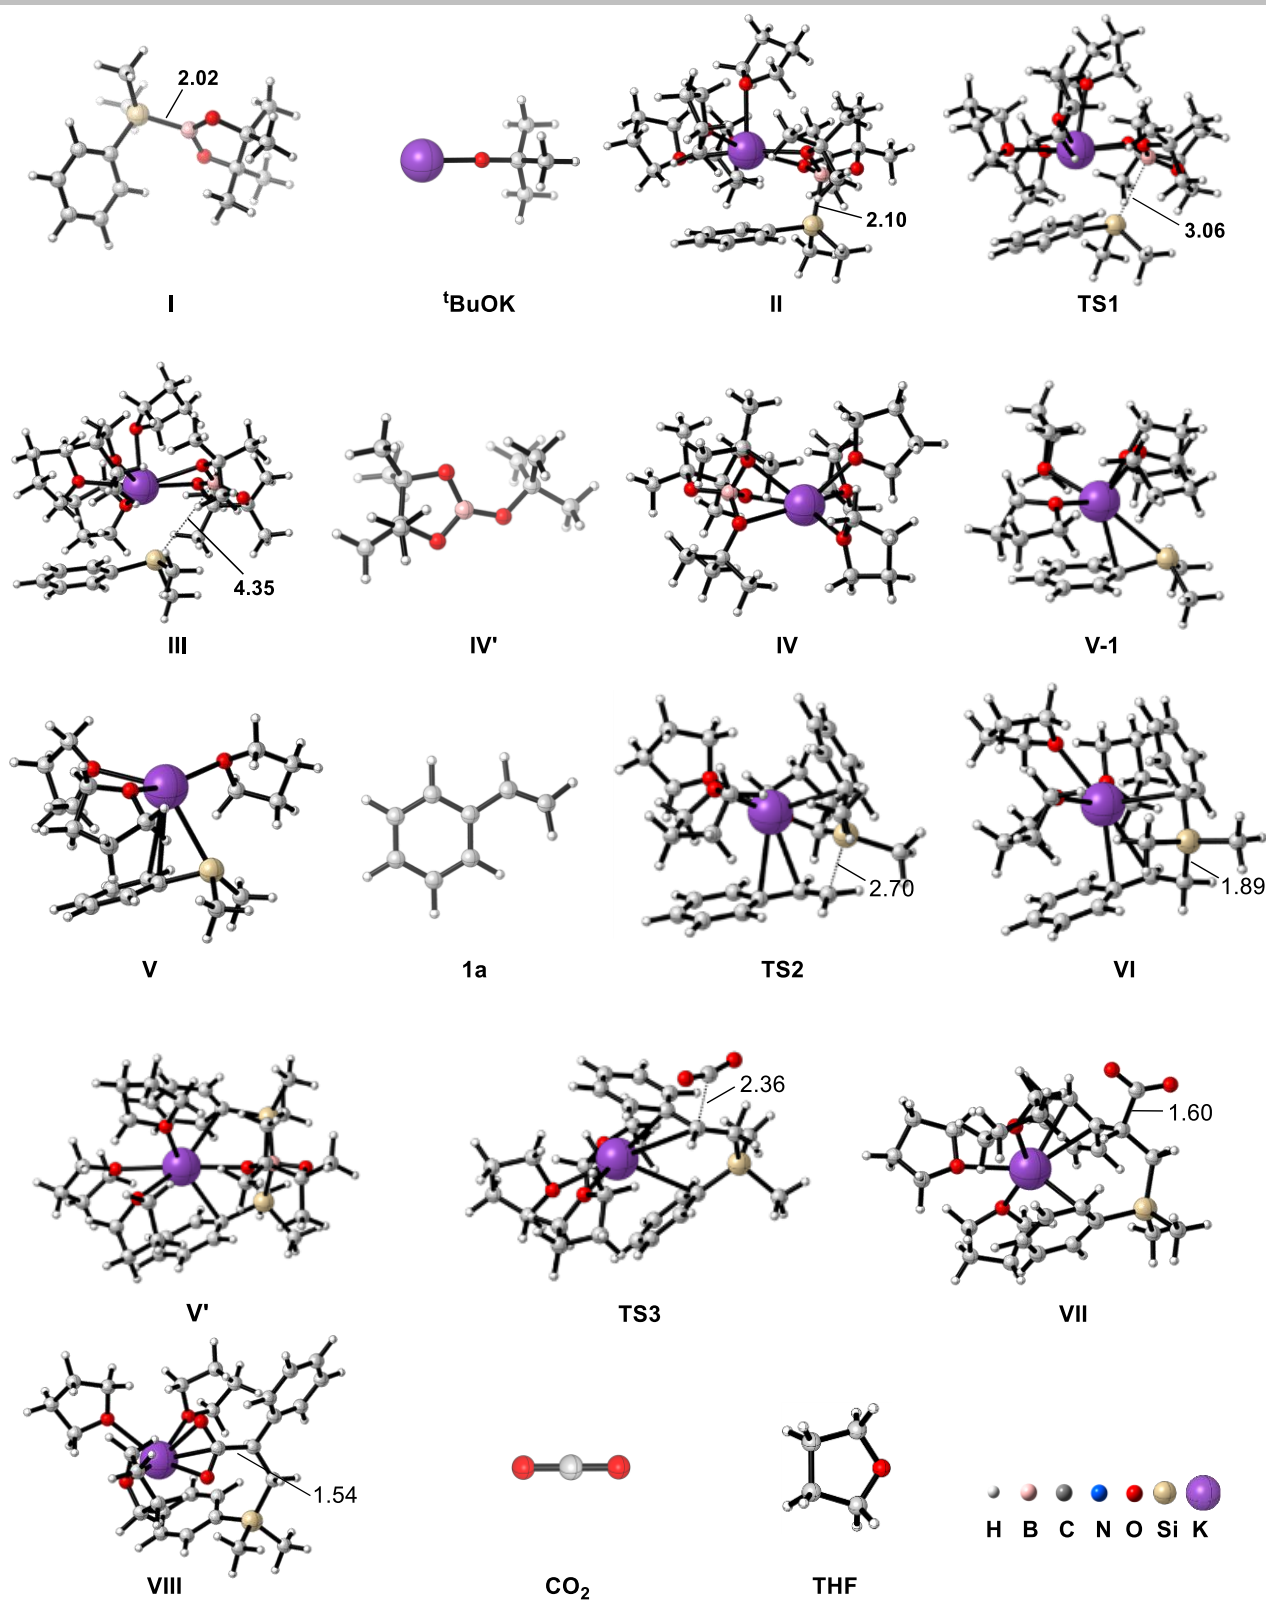

**Figure S19.** 3D structures of the species involved in the <sup>t</sup>BuOK-mediated selective 1,2-silylcarboxylation reaction of styrene (with THF). Selected distances were shown in Å.

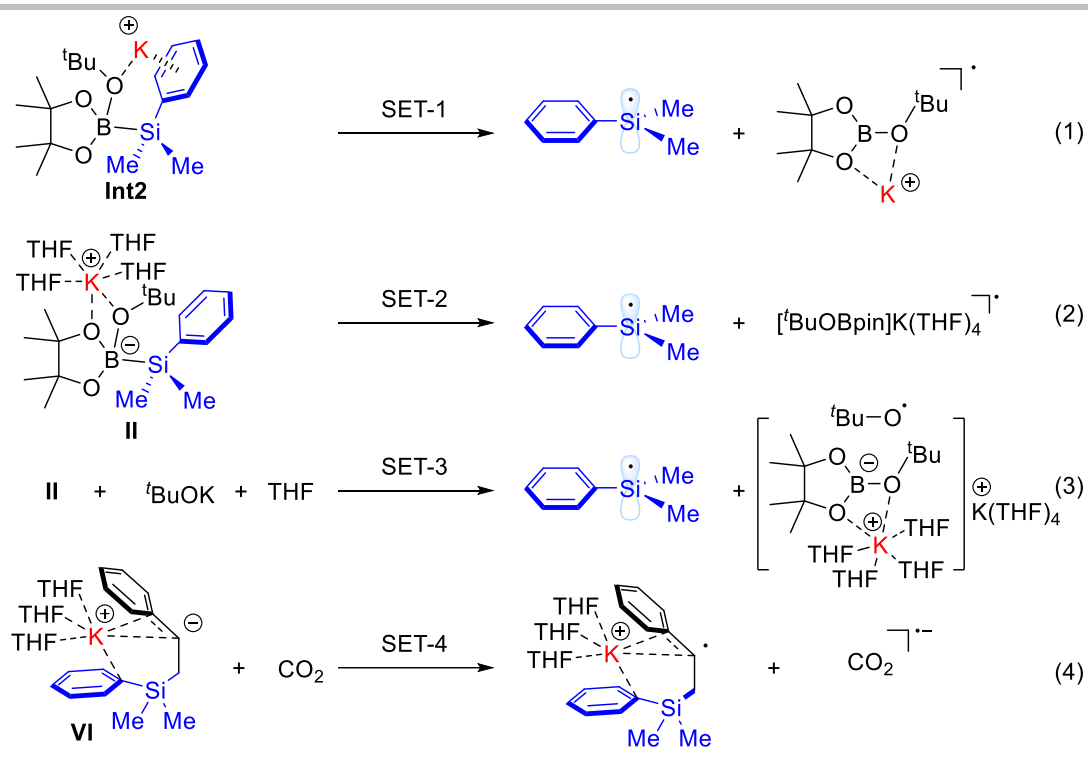

| Reaction  | $\Delta G$ (kcal/mol) |
|-----------|-----------------------|
| (1) SET-1 | 42.5                  |
| (2) SET-2 | 43.4                  |
| (3) SET-3 | 32.8                  |
| (4) SET-4 | 86.5                  |

**Figure S20.** Computed reaction energies for the generation of silyl radical via the SET processes between  $\text{tBuOK}$  and  $\text{PhMe}_2\text{SiBpin}$ .

As shown in Figure S17, the direct generation of silyl radical via the single electron transfer (SET) from intermediate **II** (with or without THF) or intermediate **II** with  $\text{tBuOK}$  are endergonic by 42.5, 43.4, and 32.8 kcal/mol, respectively. And the SET processes between carbanion **VI** and  $\text{CO}_2$  is also thermodynamically unfavorable (being endergonic by 86.5 kcal/mol). Thus, SET mechanisms could be excluded.

## 5. NMR Spectra

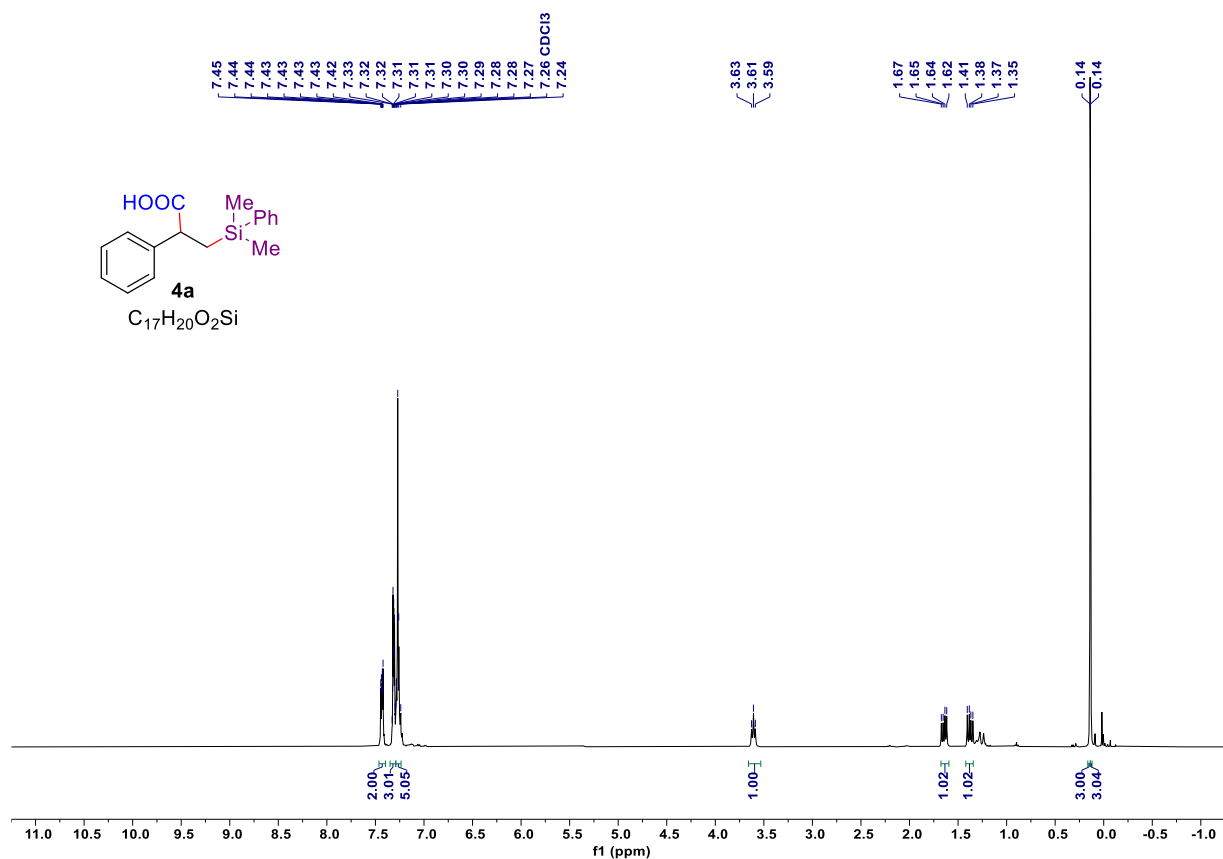

$^1H$  NMR spectrum (400 MHz,  $CDCl_3$ ) of compound **4a**.

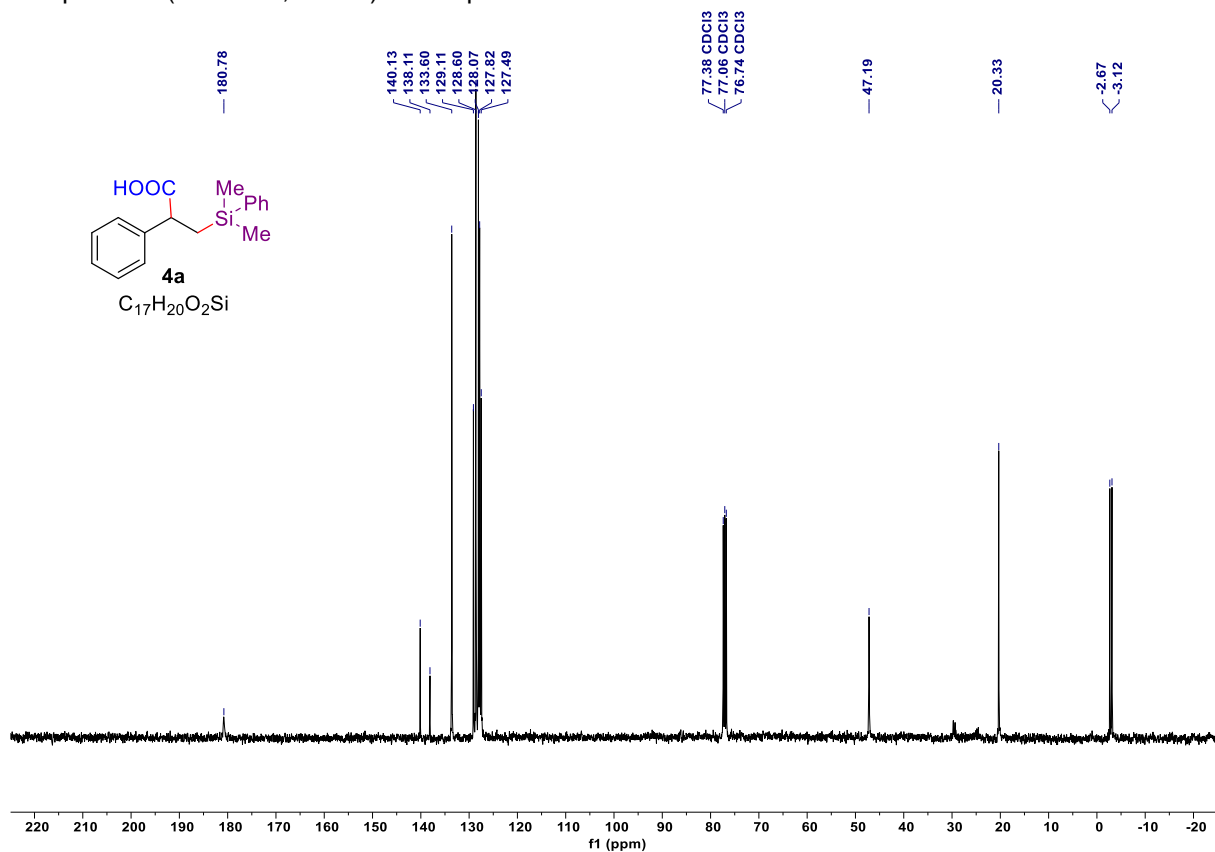

$^{13}C$  NMR spectrum (100 MHz,  $CDCl_3$ ) of compound **4a**.

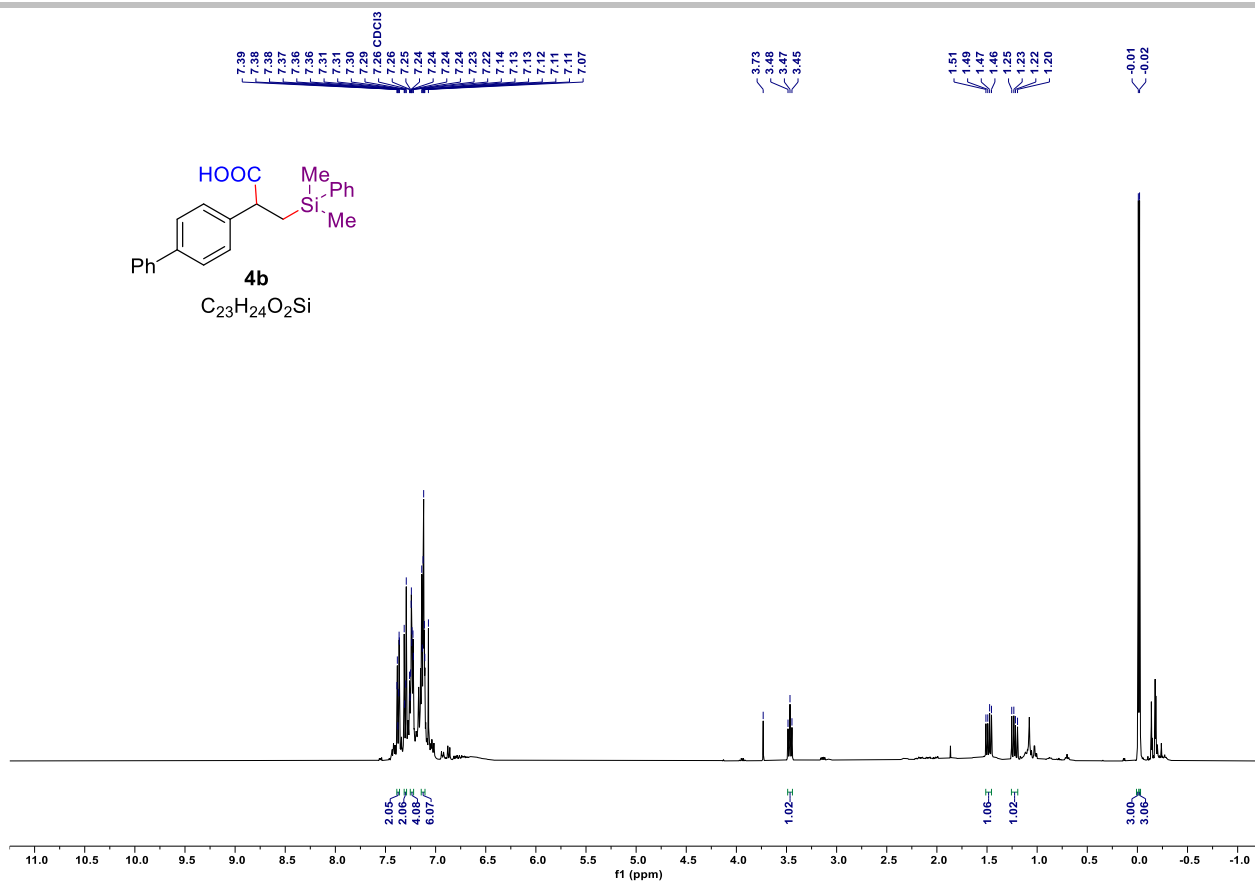

**<sup>1</sup>H NMR spectrum (400 MHz, CDCl<sub>3</sub>) of compound 4b.**

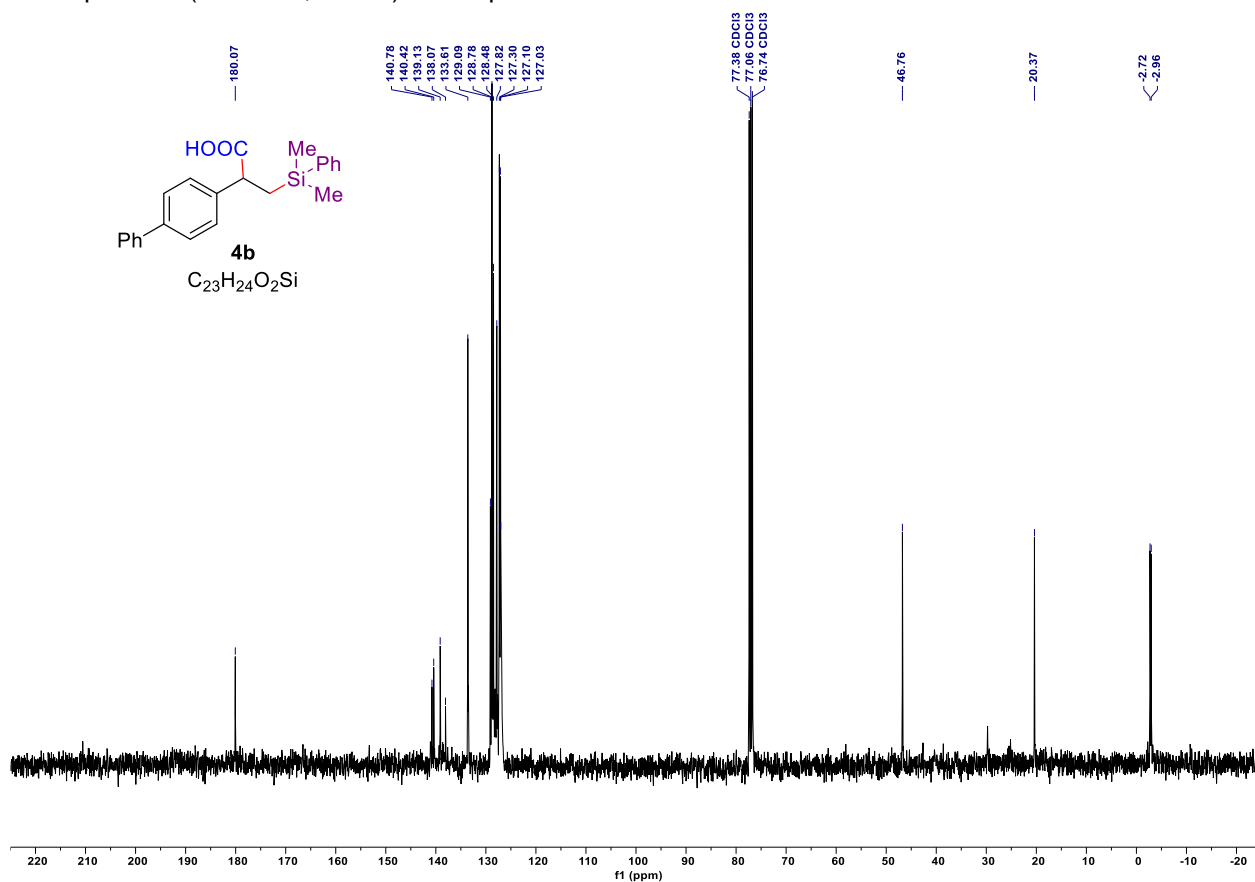

**<sup>13</sup>C{<sup>1</sup>H} NMR spectrum (100 MHz, CDCl<sub>3</sub>) of compound 4b.**



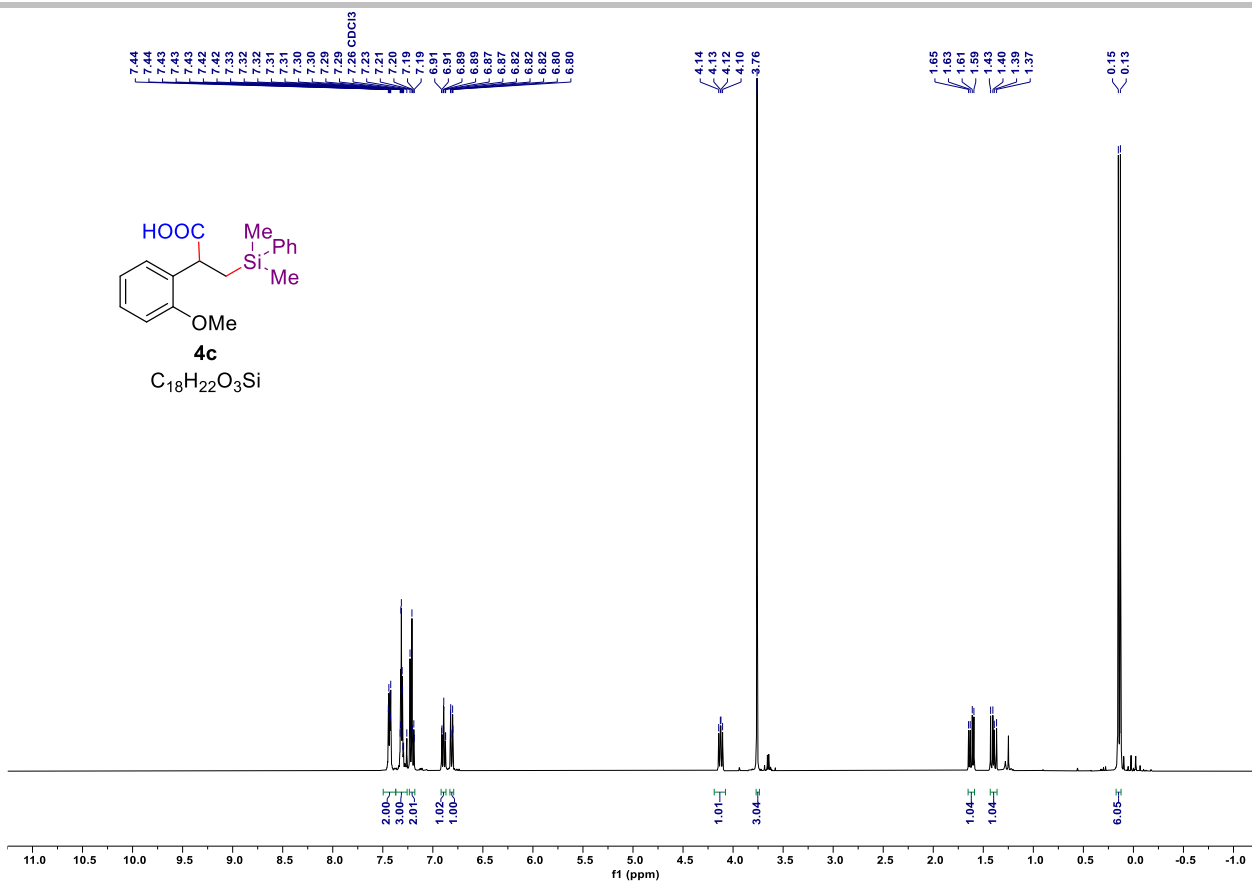

**<sup>1</sup>H NMR spectrum (400 MHz, CDCl<sub>3</sub>) of compound **4c**.**

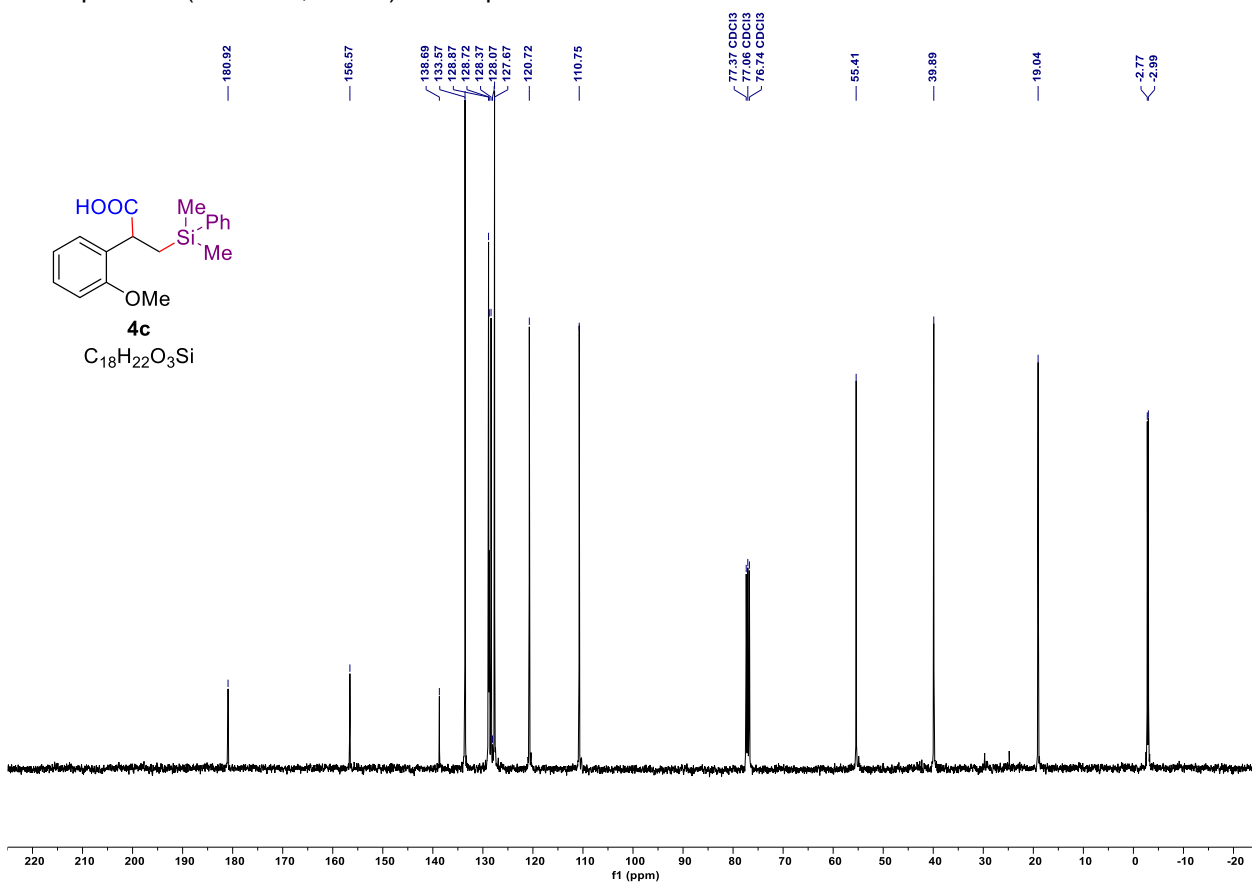

**<sup>13</sup>C{<sup>1</sup>H} NMR spectrum (100 MHz, CDCl<sub>3</sub>) of compound **4c**.**

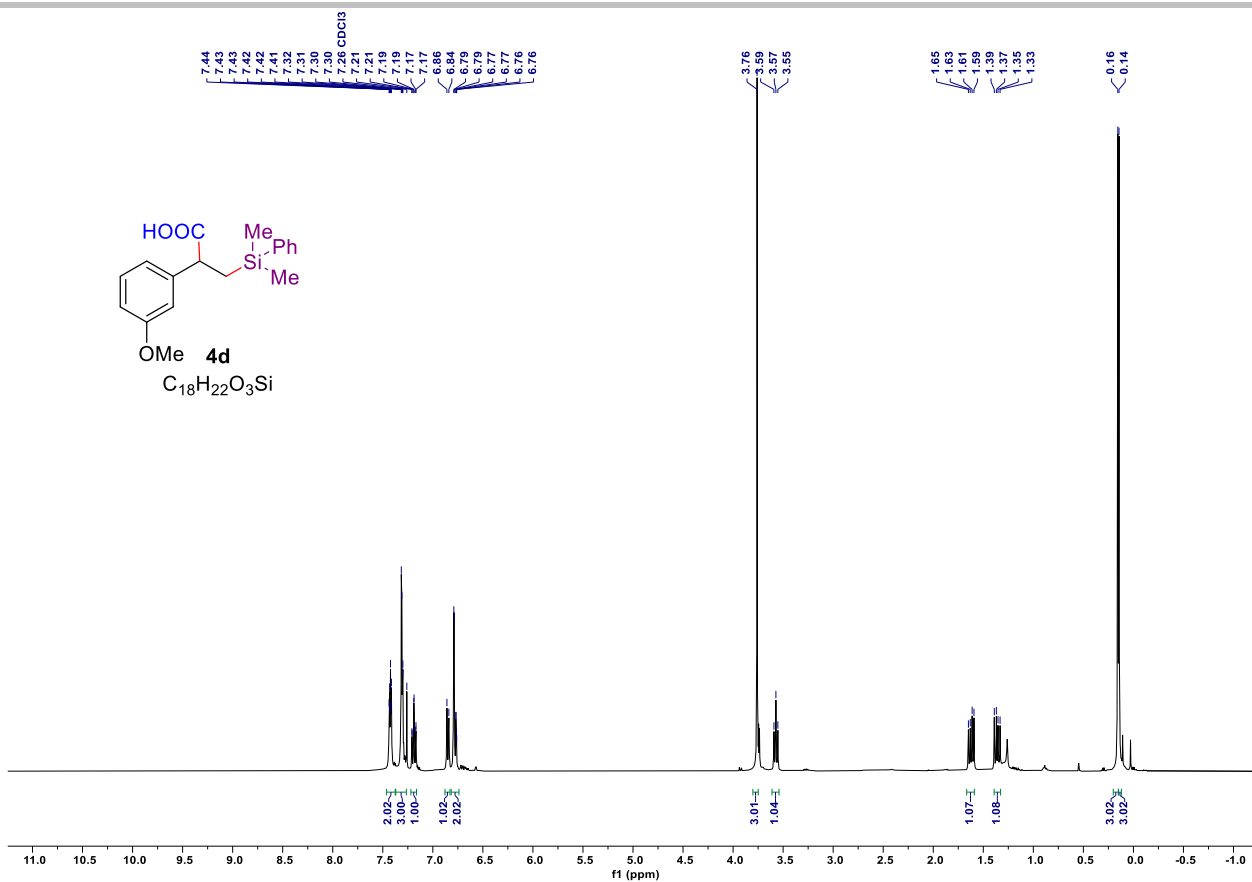

**<sup>1</sup>H NMR spectrum (400 MHz, CDCl<sub>3</sub>) of compound 4d.**

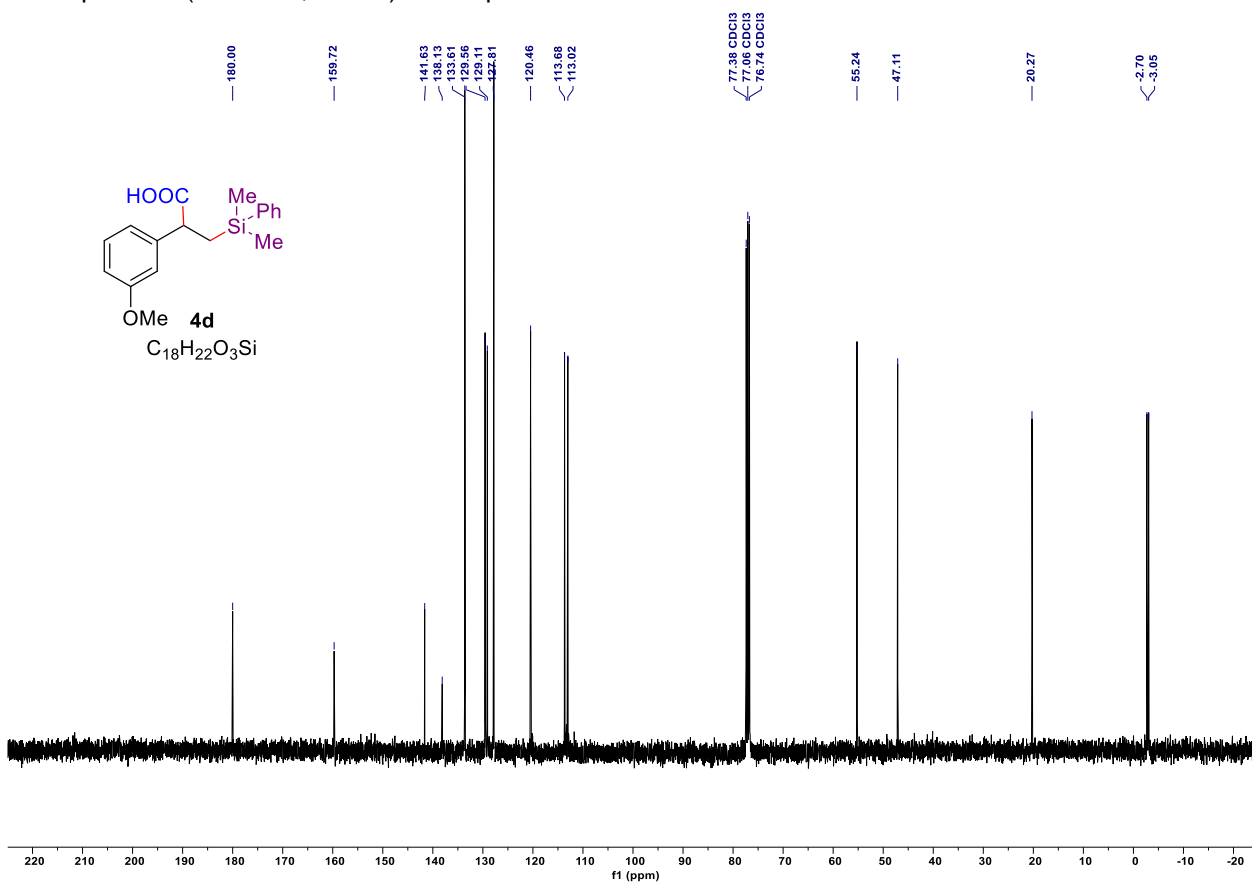

**<sup>13</sup>C{<sup>1</sup>H} NMR spectrum (100 MHz, CDCl<sub>3</sub>) of compound 4d.**

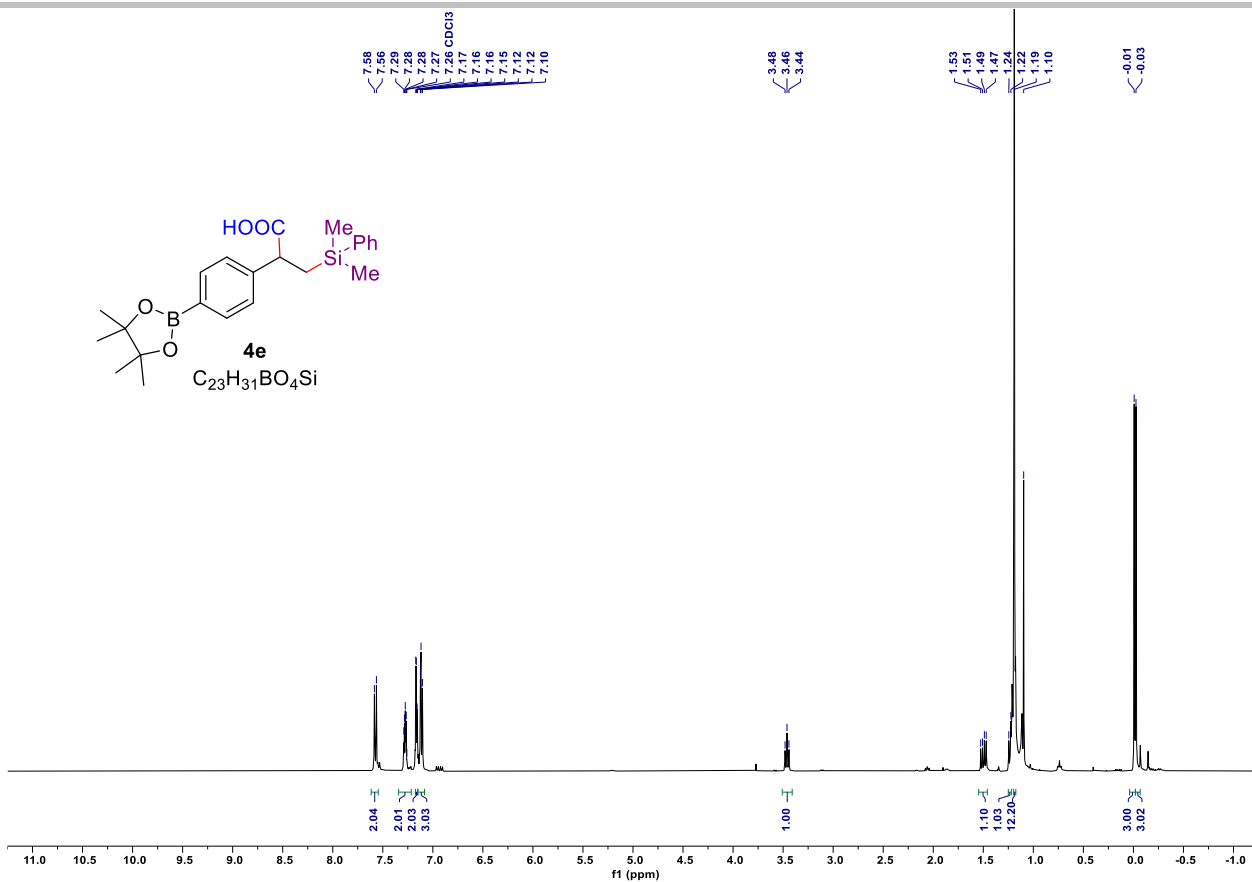

$^1H$  NMR spectrum (400 MHz,  $CDCl_3$ ) of compound 4e.

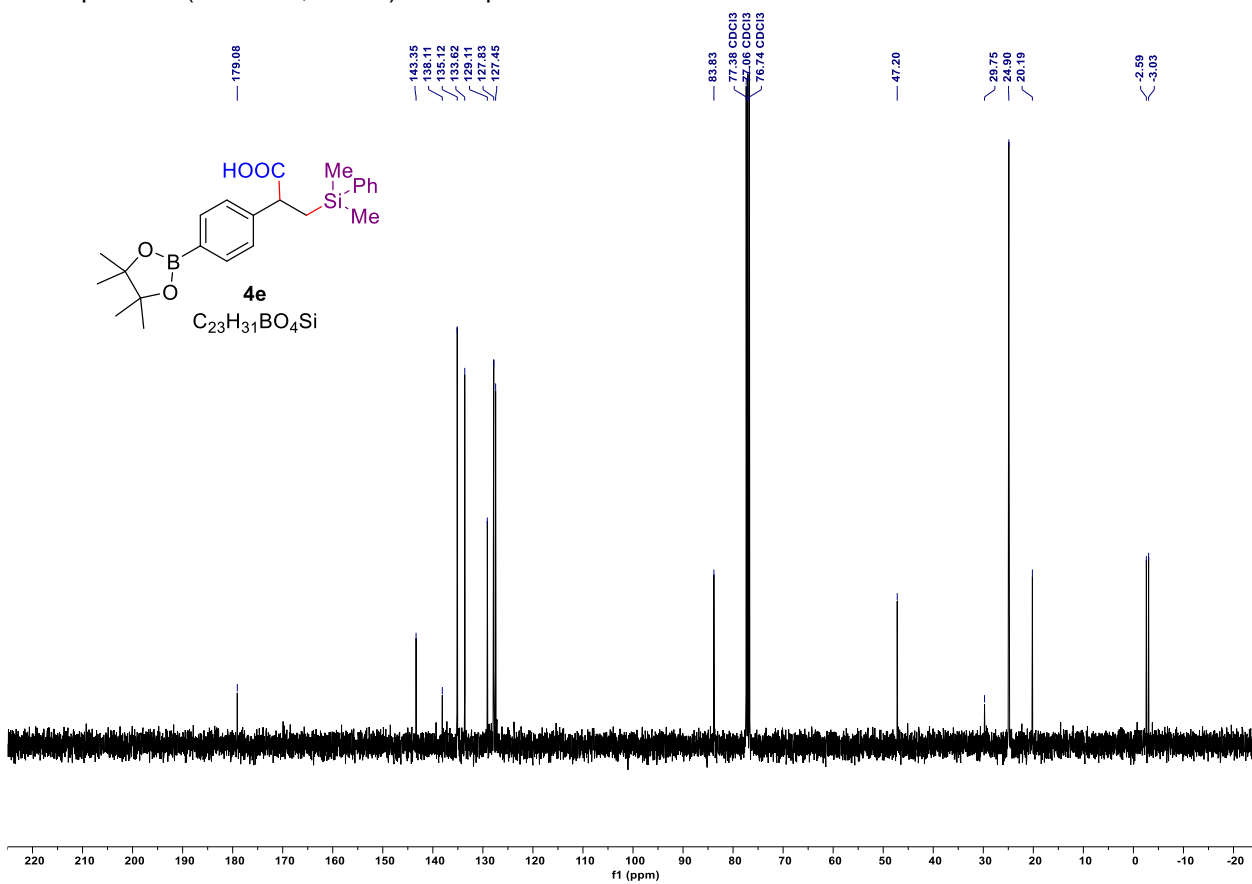

$^{13}C$  NMR spectrum (100 MHz,  $CDCl_3$ ) of compound 4e.

— 30.98

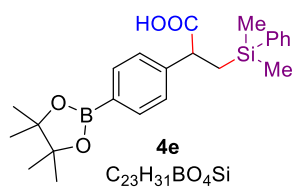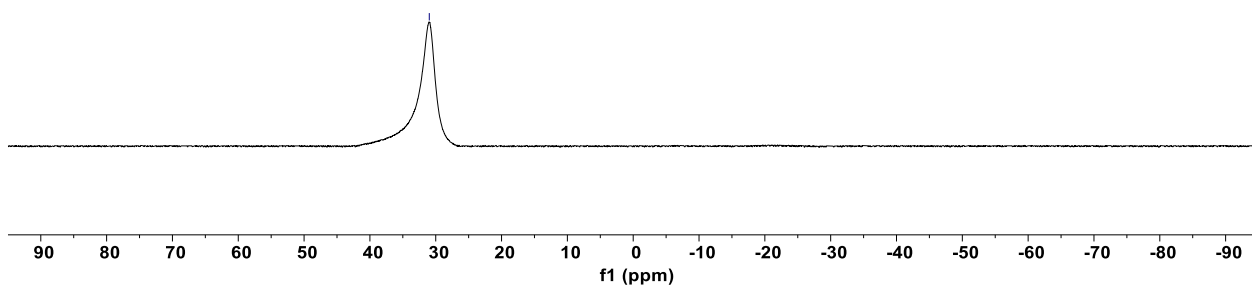

$^{11}B\{^1H\}$  NMR spectrum (128 MHz,  $CDCl_3$ ) of compound **4e**.

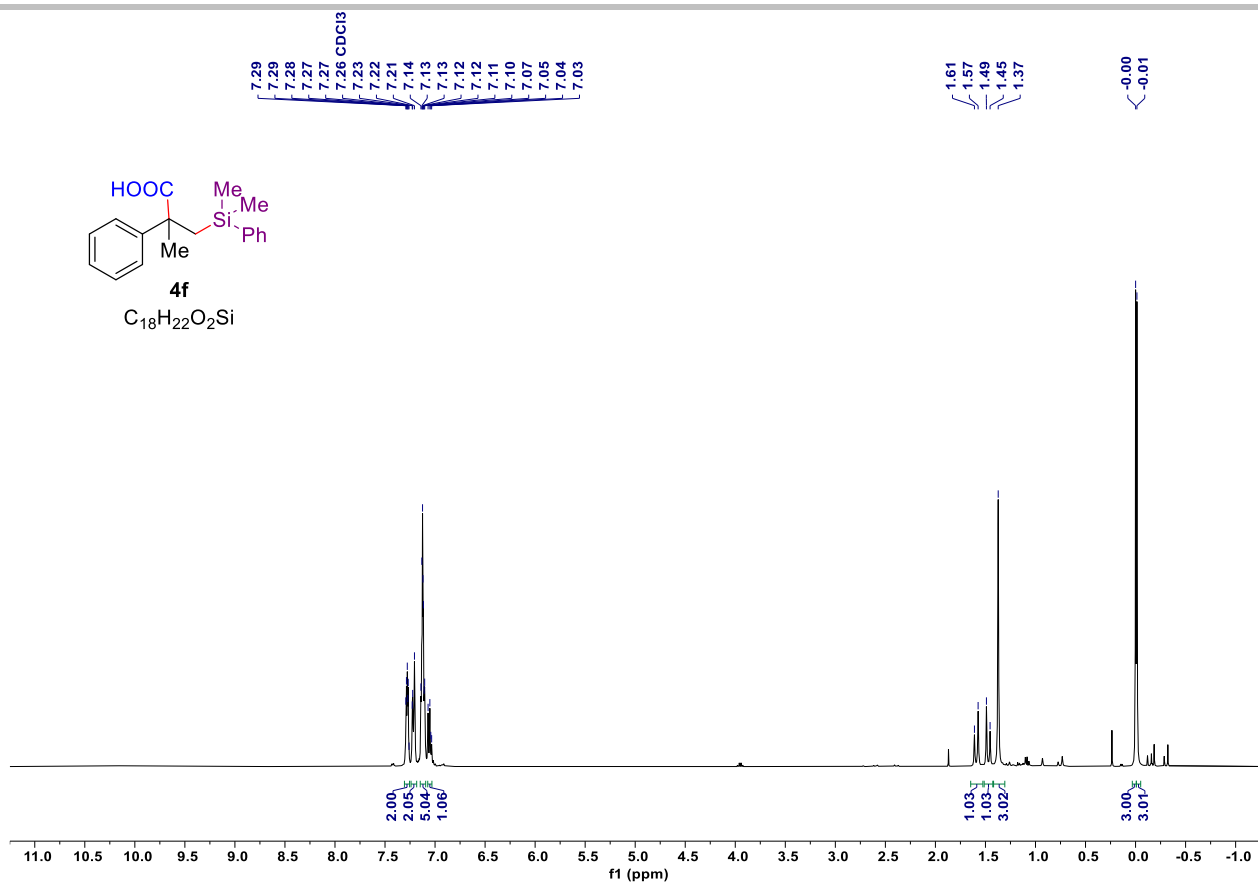

$^1H$  NMR spectrum (400 MHz,  $CDCl_3$ ) of compound **4f**.

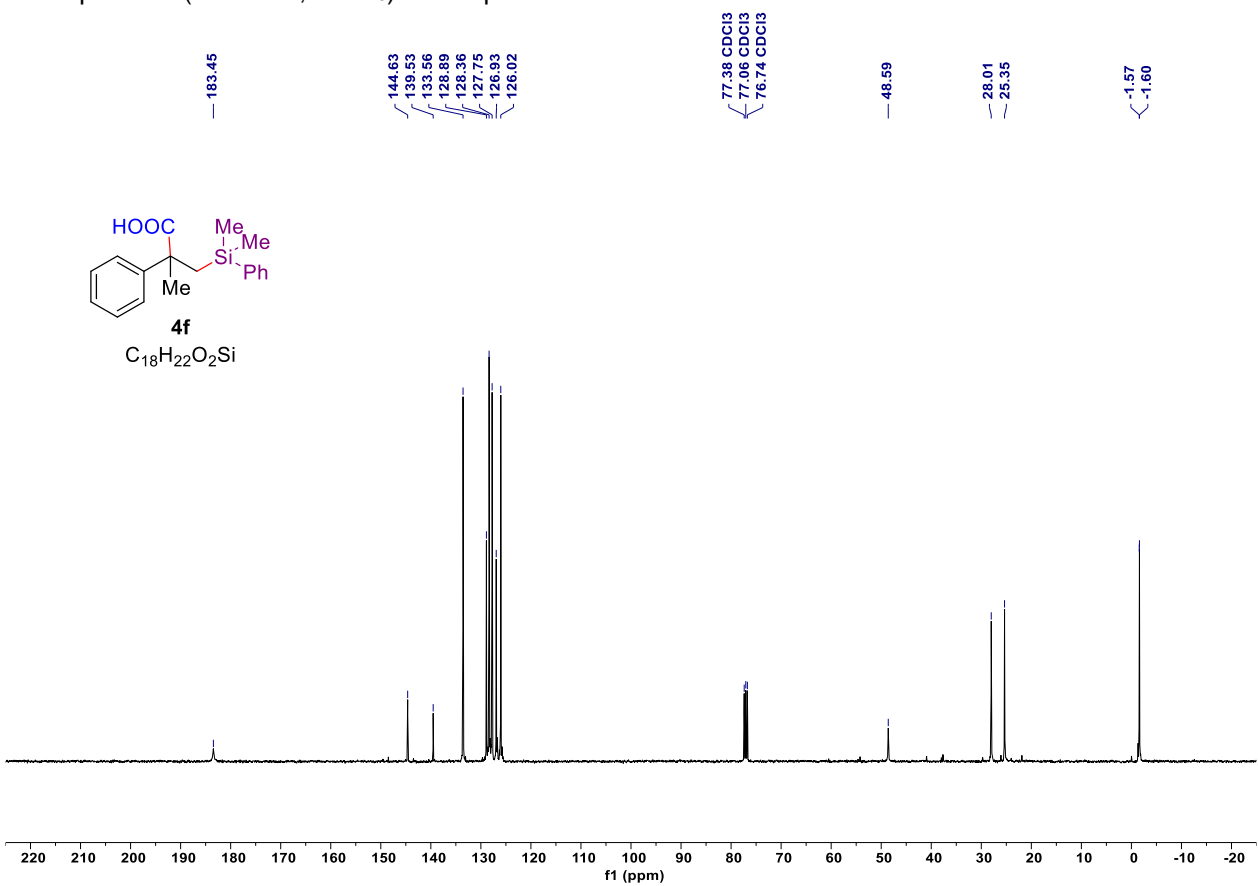

$^{13}C\{^1H\}$  NMR spectrum (100 MHz,  $CDCl_3$ ) of compound **4f**.

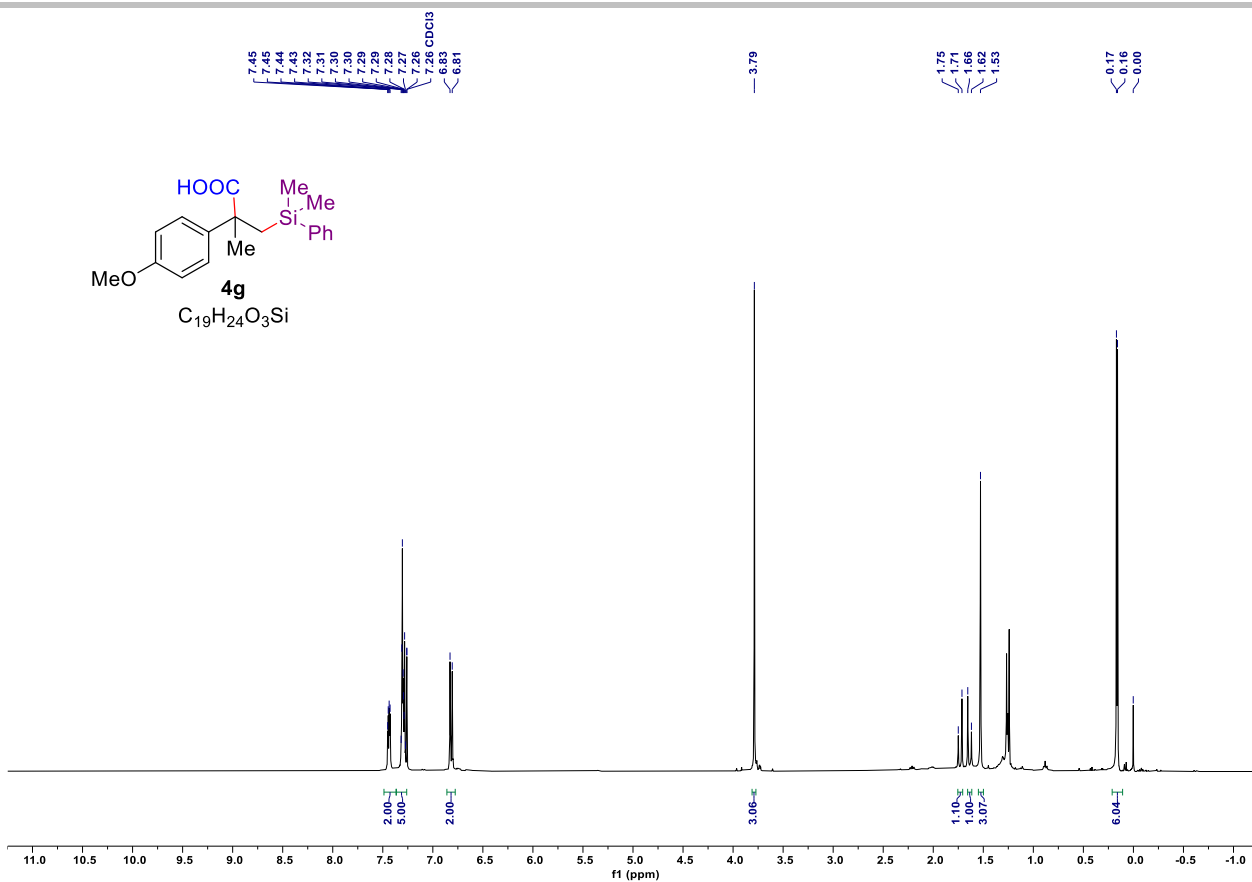

$^1H$  NMR spectrum (400 MHz,  $CDCl_3$ ) of compound **4g**.

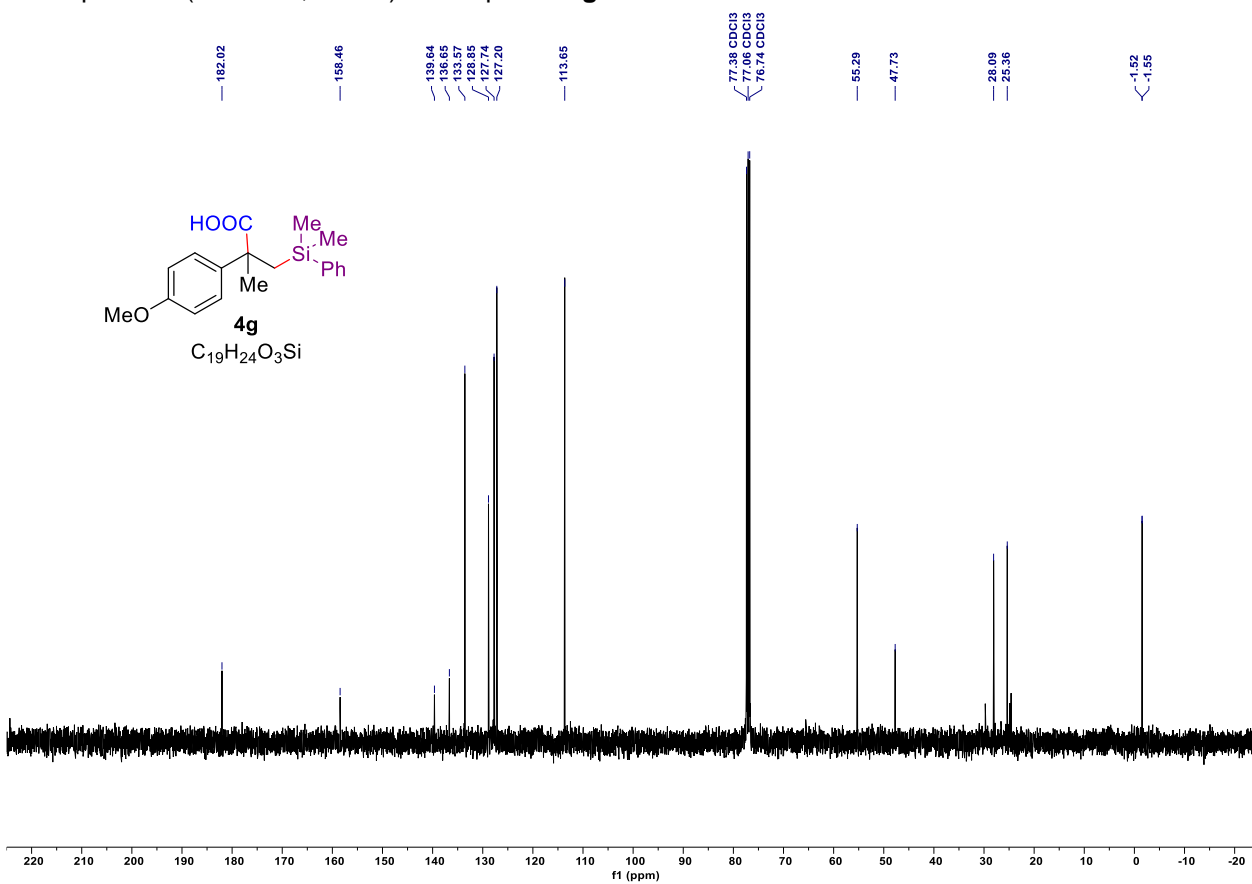

$^{13}C$  NMR spectrum (100 MHz,  $CDCl_3$ ) of compound **4g**.

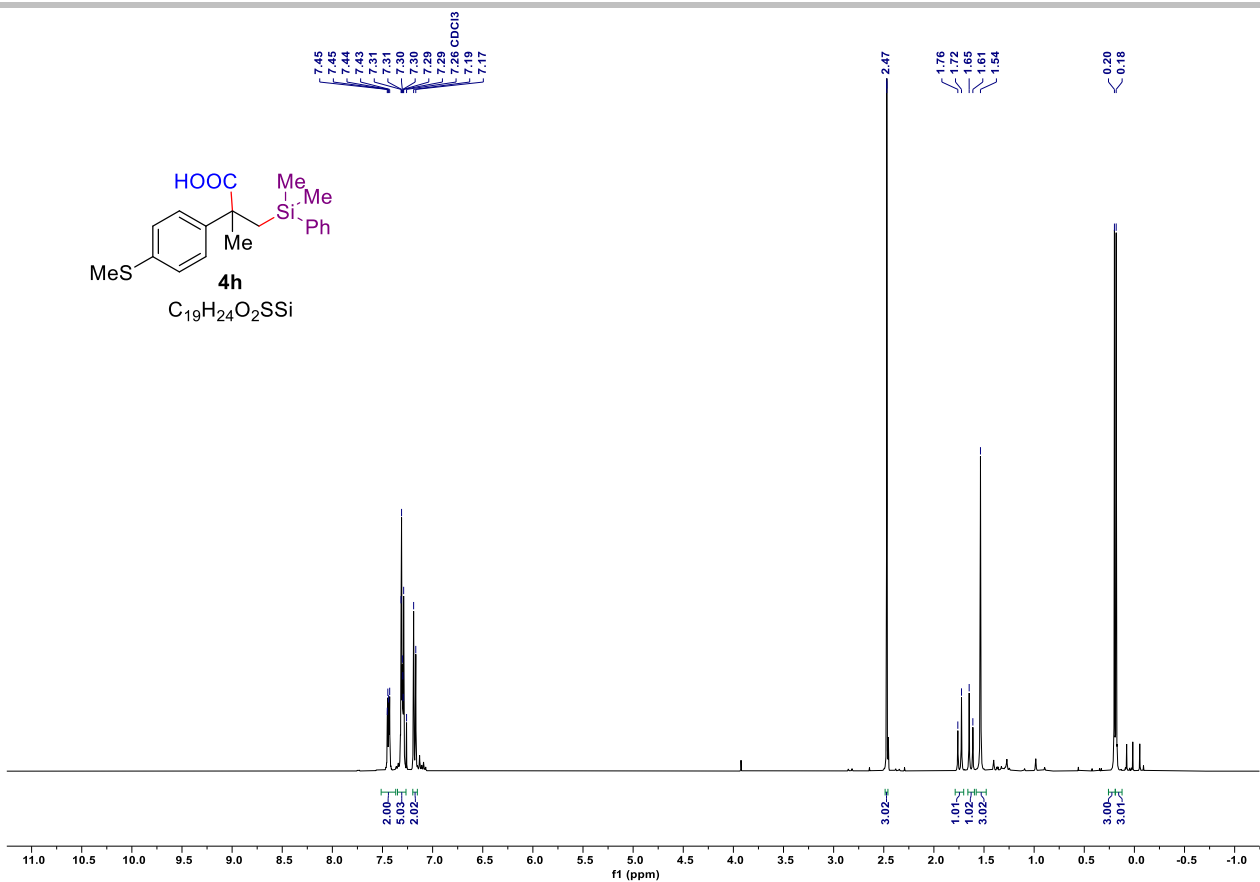

$^1H$  NMR spectrum (400 MHz,  $CDCl_3$ ) of compound **4h**.

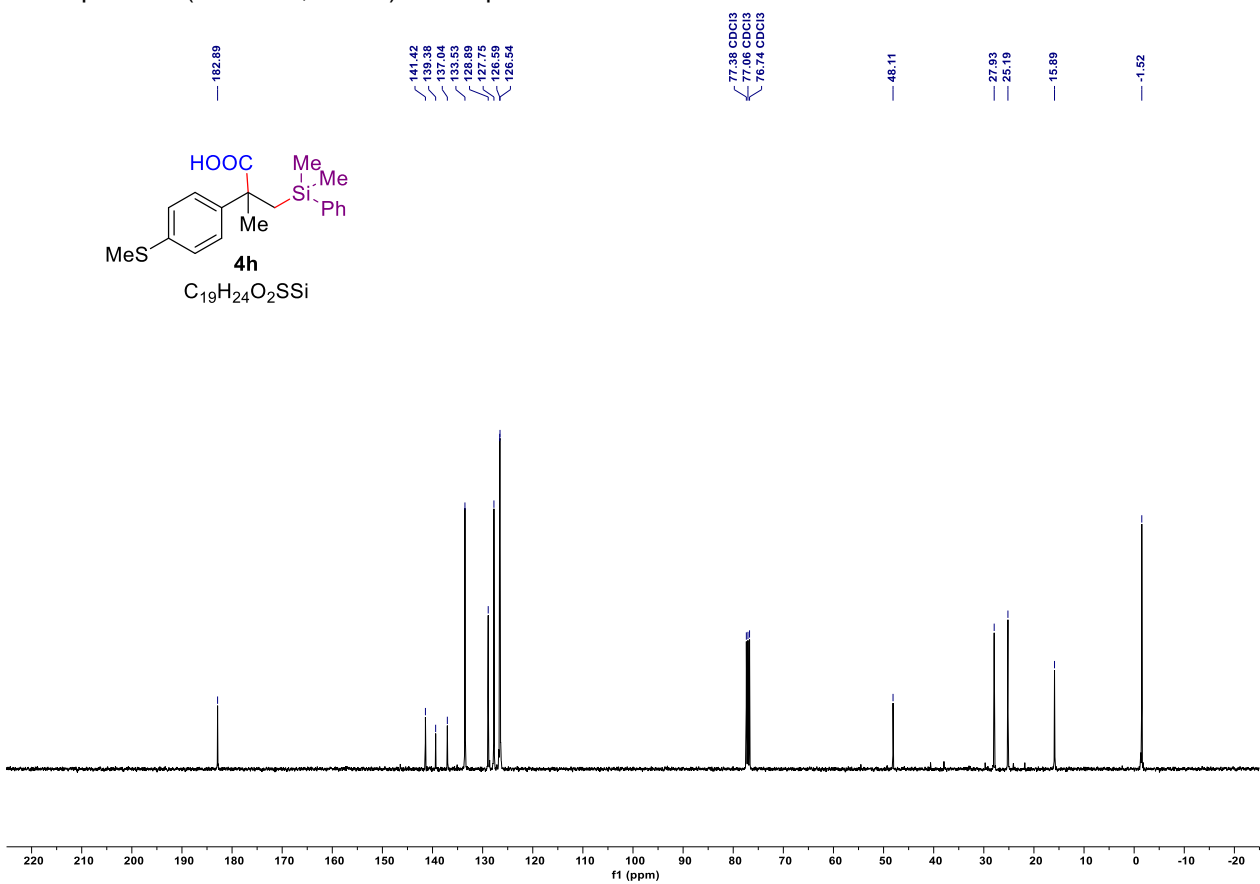

$^{13}C$  NMR spectrum (100 MHz,  $CDCl_3$ ) of compound **4h**.

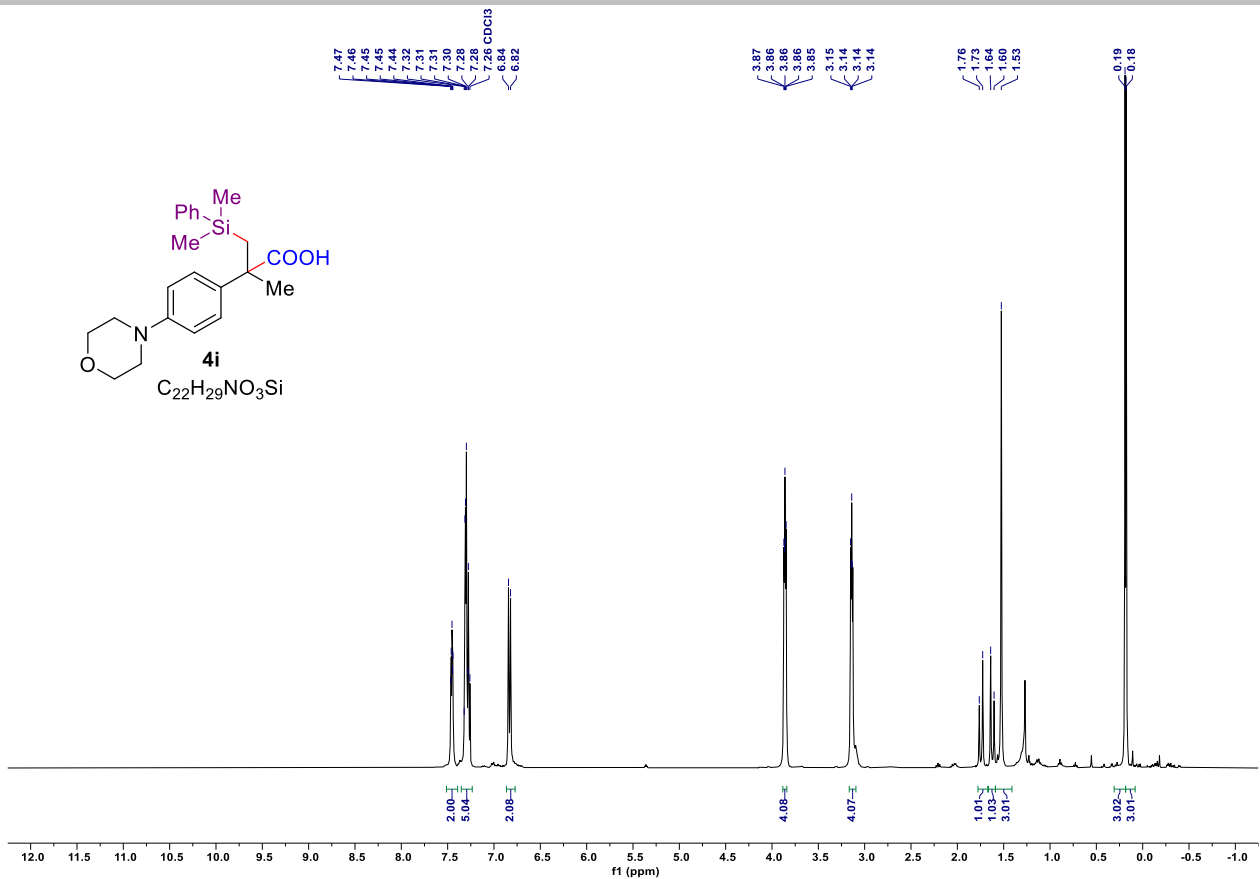

**<sup>1</sup>H NMR spectrum (400 MHz, CDCl<sub>3</sub>) of compound 4i.**

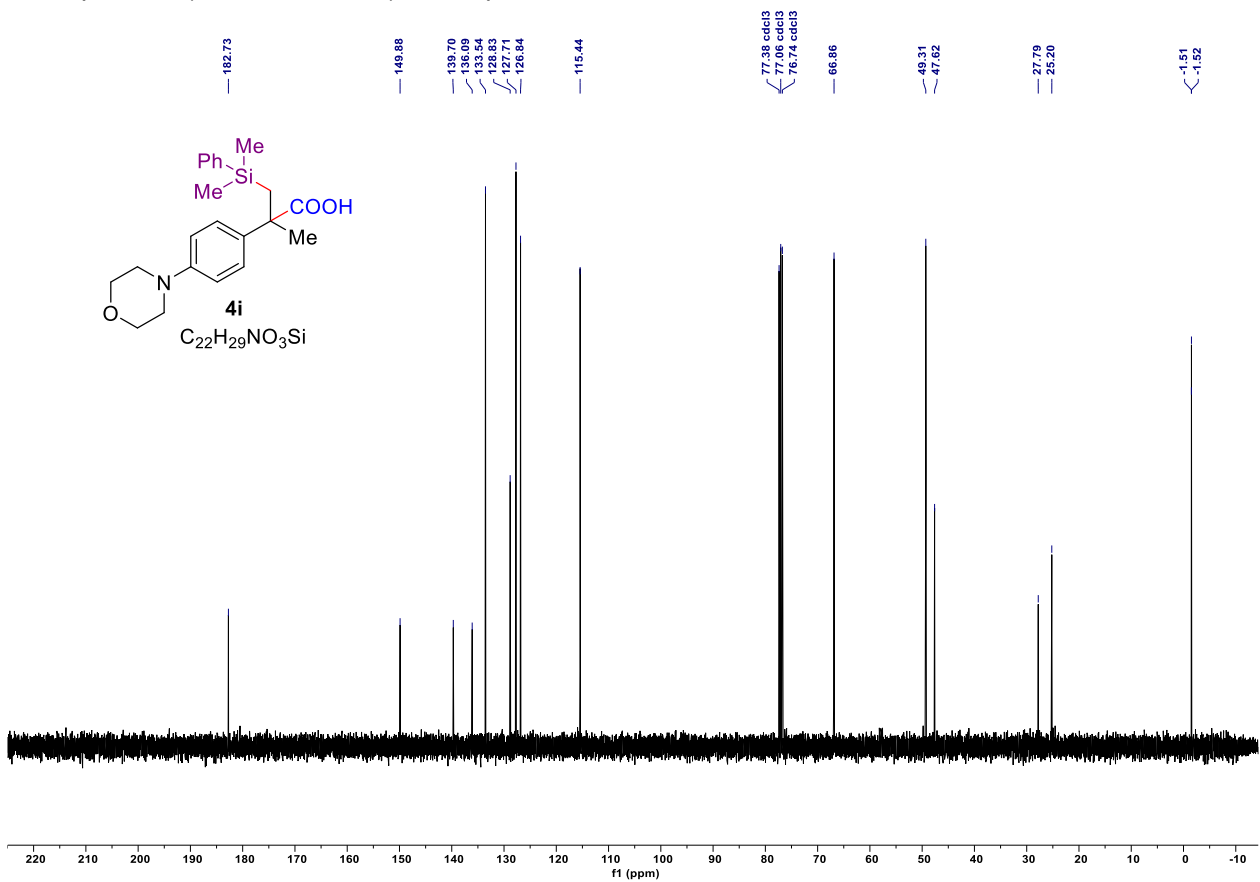

**<sup>13</sup>C NMR spectrum (100 MHz, CDCl<sub>3</sub>) of compound 4i. gao-27-81 或 82chR.**



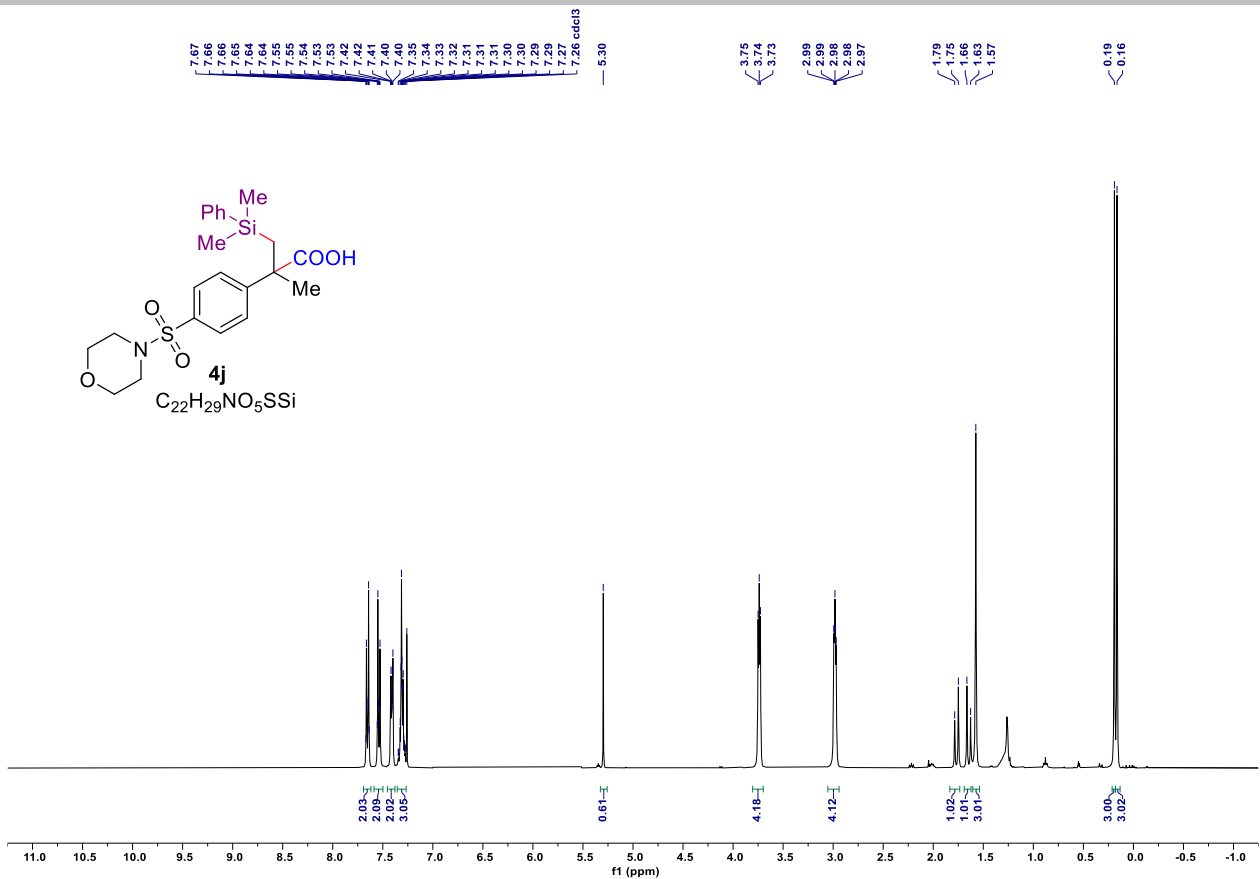

**<sup>1</sup>H NMR spectrum (400 MHz, CDCl<sub>3</sub>) of compound 4j.**

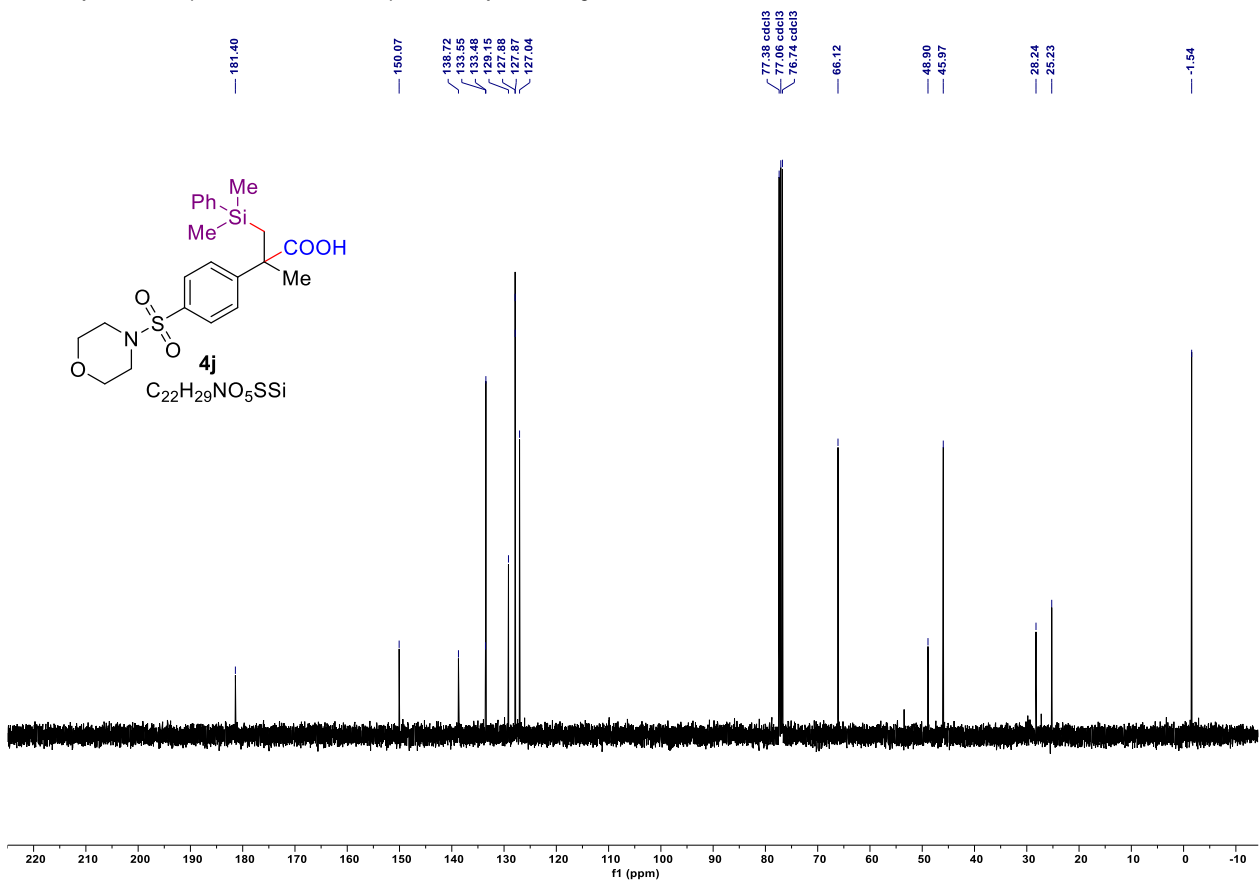

**<sup>13</sup>C{<sup>1</sup>H} NMR spectrum (100 MHz, CDCl<sub>3</sub>) of compound 4j. gao-27-114ch.**

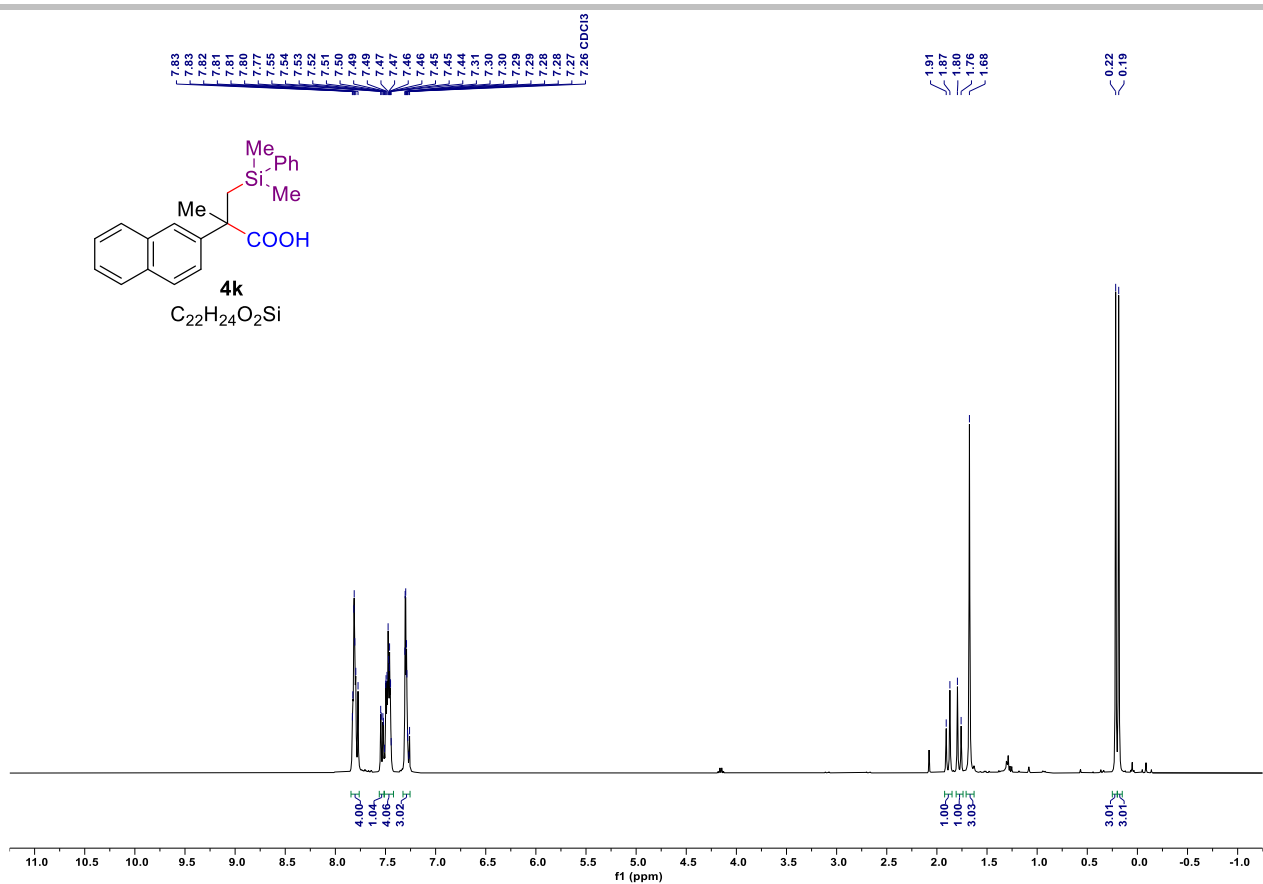

**<sup>1</sup>H NMR spectrum (400 MHz, CDCl<sub>3</sub>) of compound 4k.**

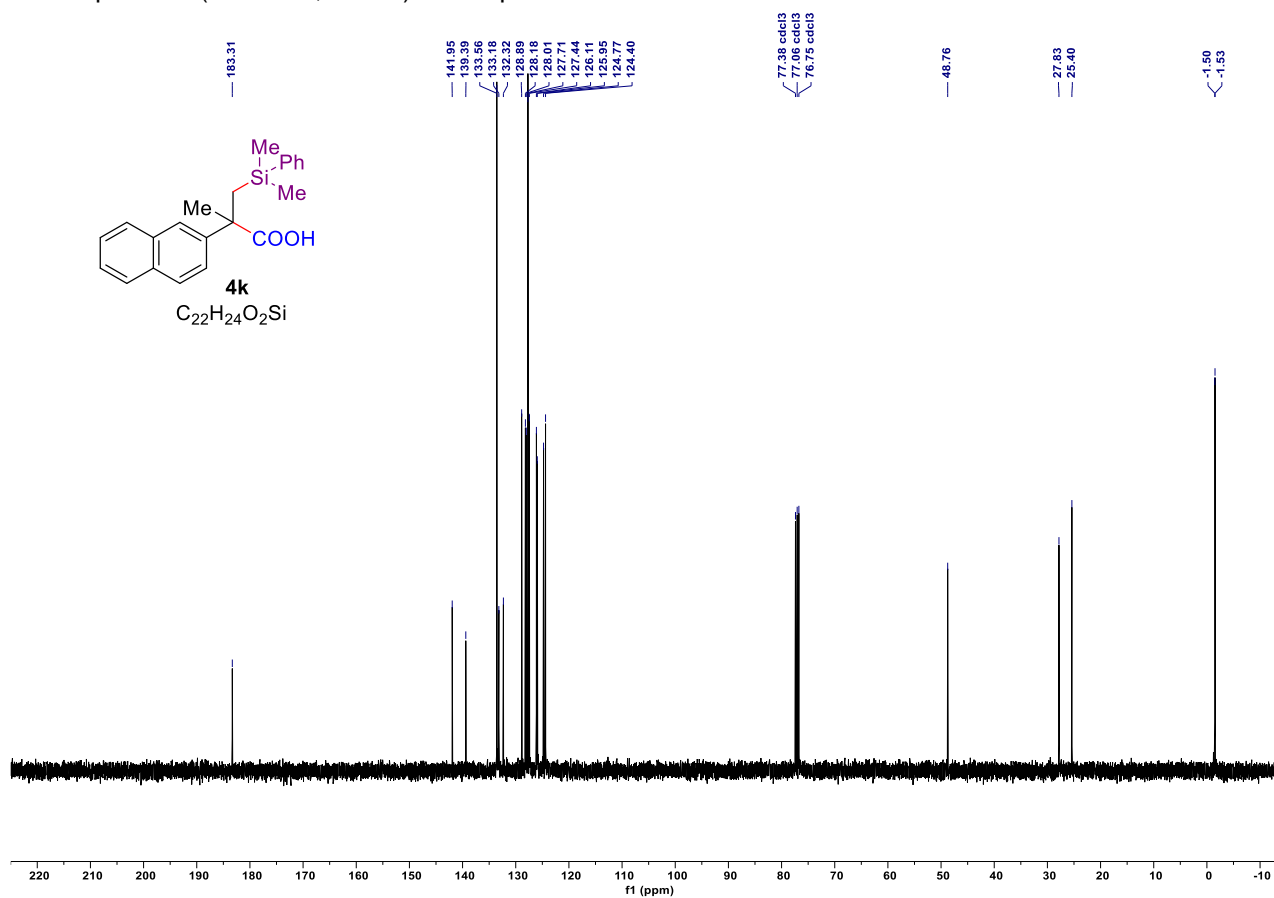

**<sup>13</sup>C{<sup>1</sup>H} NMR spectrum (100 MHz, CDCl<sub>3</sub>) of compound 4k. gao-27-109ch.**

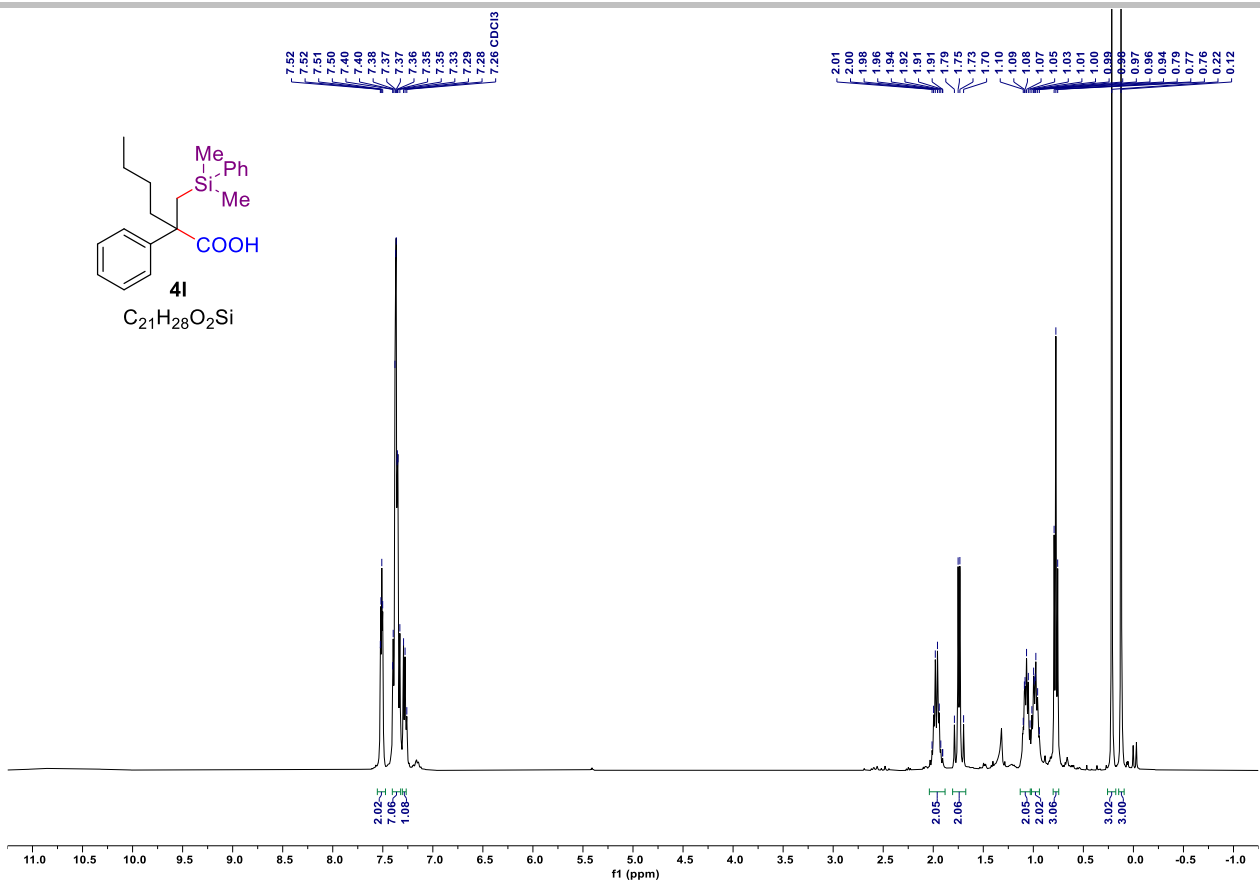

$^1H$  NMR spectrum (400 MHz,  $CDCl_3$ ) of compound 4I.

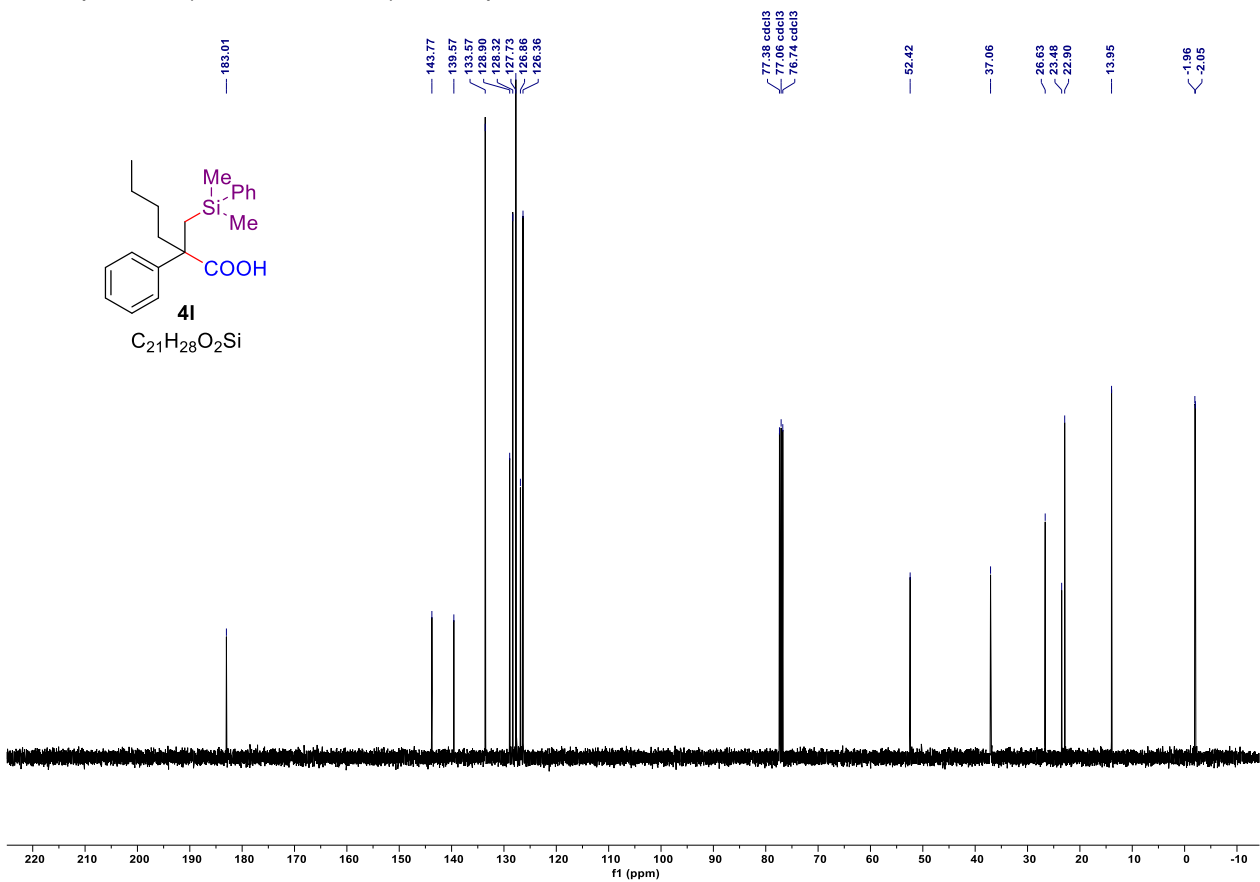

$^{13}C$  NMR spectrum (100 MHz,  $CDCl_3$ ) of compound 4I. gao-27-110ch.

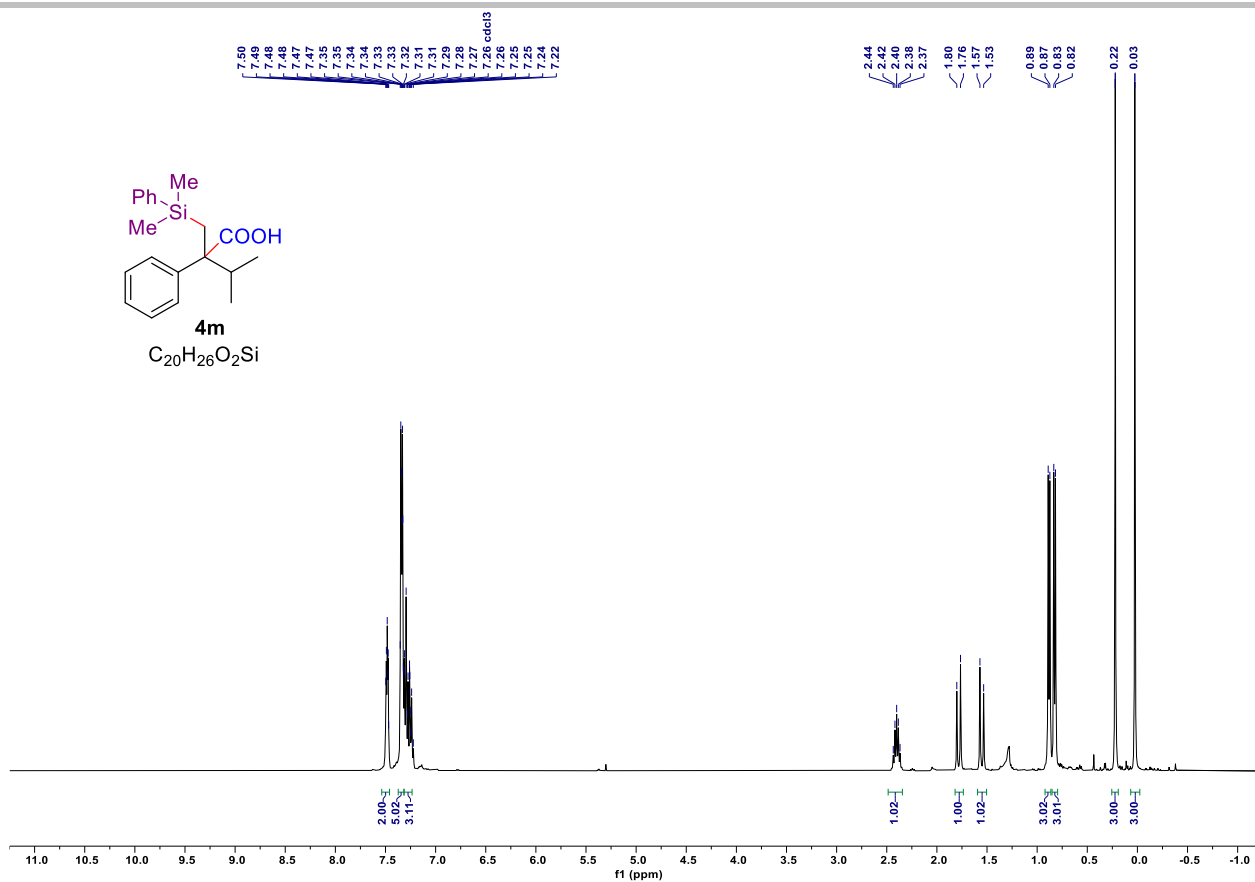

$^1H$  NMR spectrum (400 MHz,  $CDCl_3$ ) of compound **4m**.

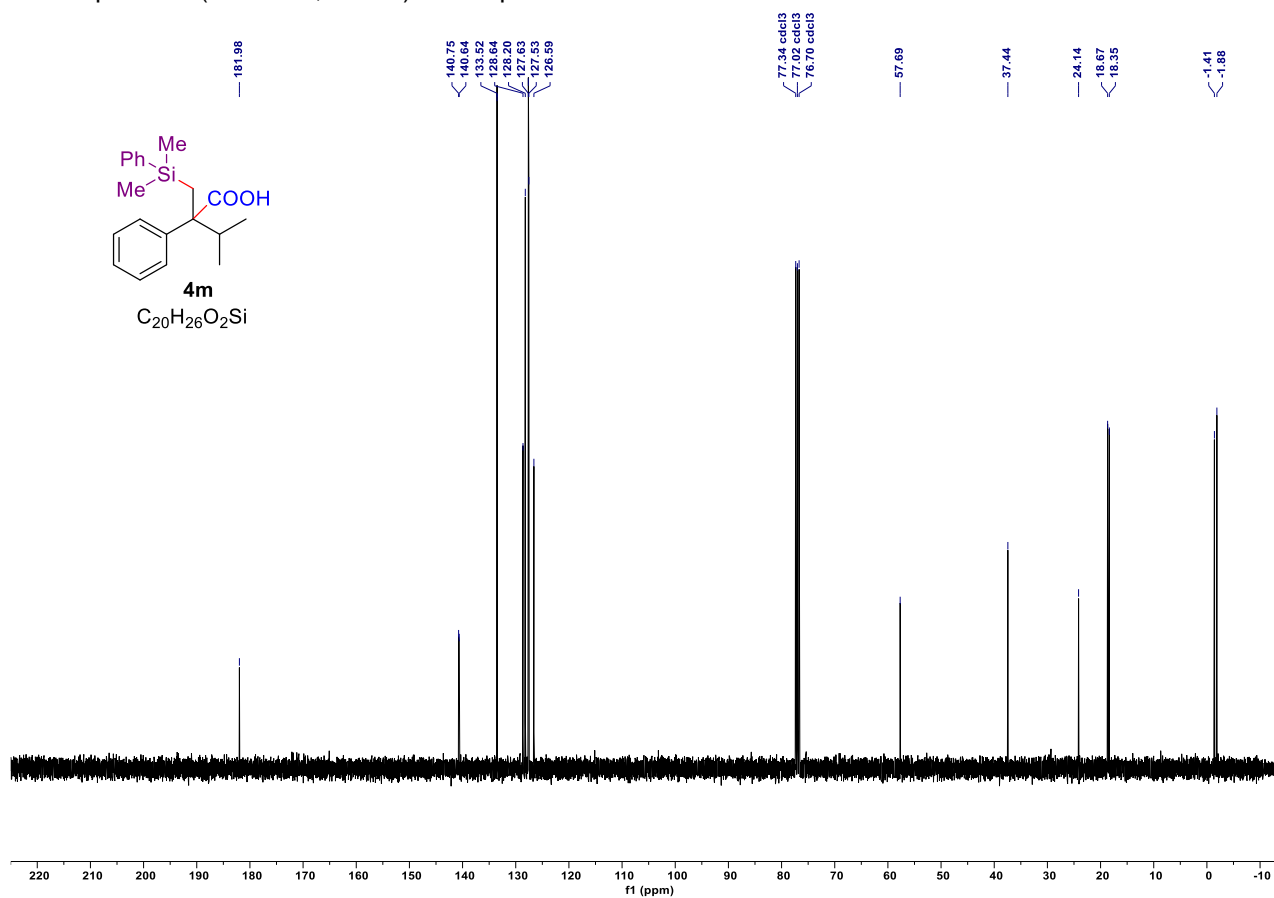

$^{13}C$  NMR spectrum (100 MHz,  $CDCl_3$ ) of compound **4m**. gao-27-107ch.

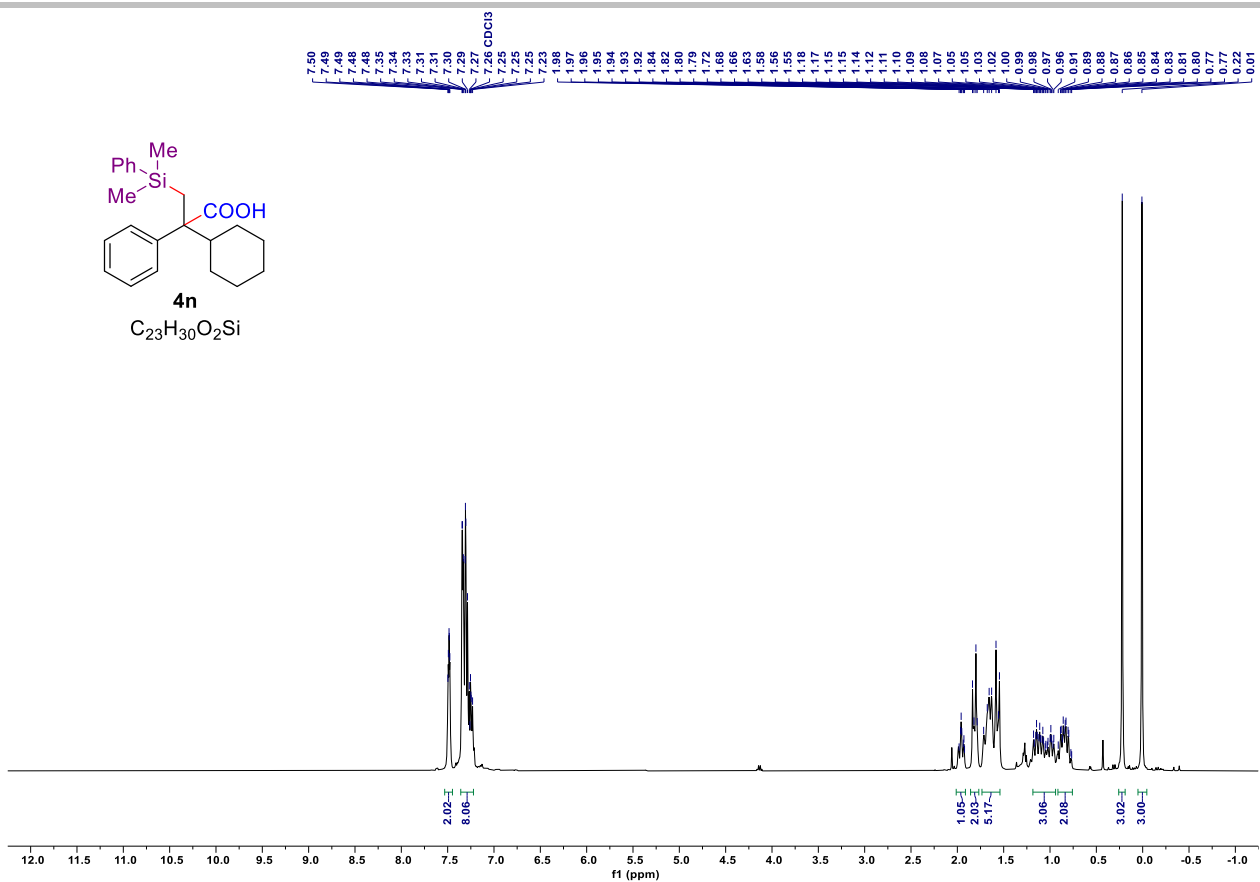

$^1H$  NMR spectrum (400 MHz,  $CDCl_3$ ) of compound 4n.

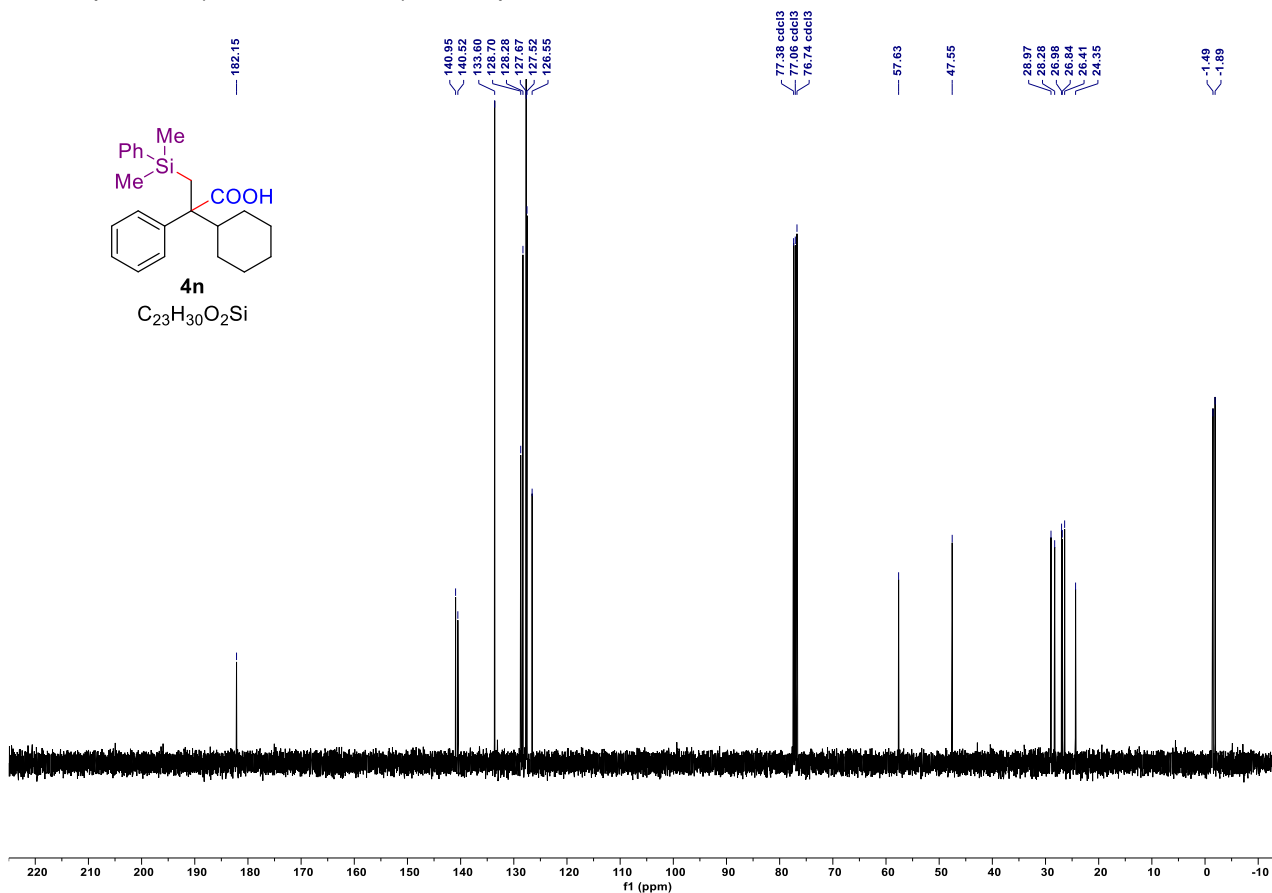

$^{13}C$  NMR spectrum (100 MHz,  $CDCl_3$ ) of compound 4n. gao-27-106ch.

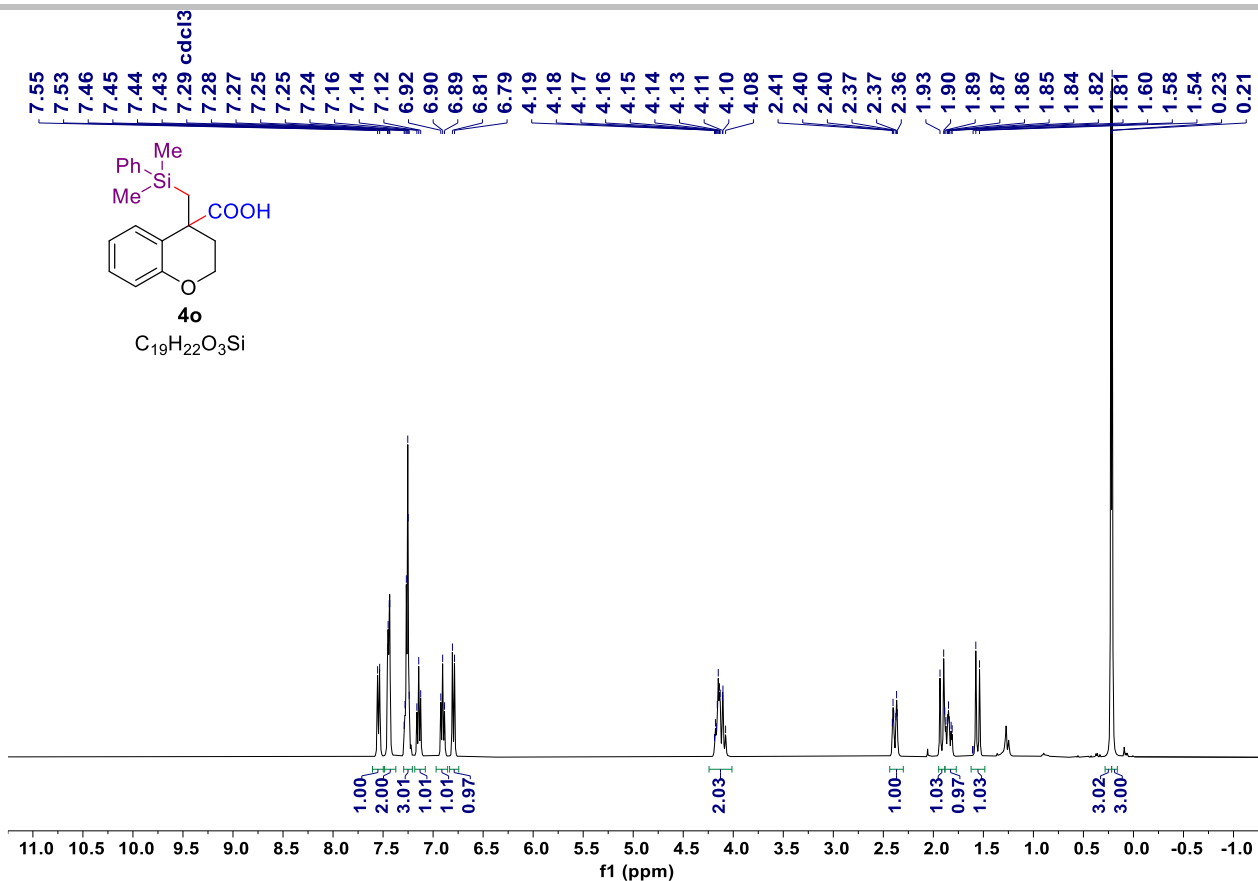

$^1\text{H}$  NMR spectrum (400 MHz,  $\text{CDCl}_3$ ) of compound **4o**.

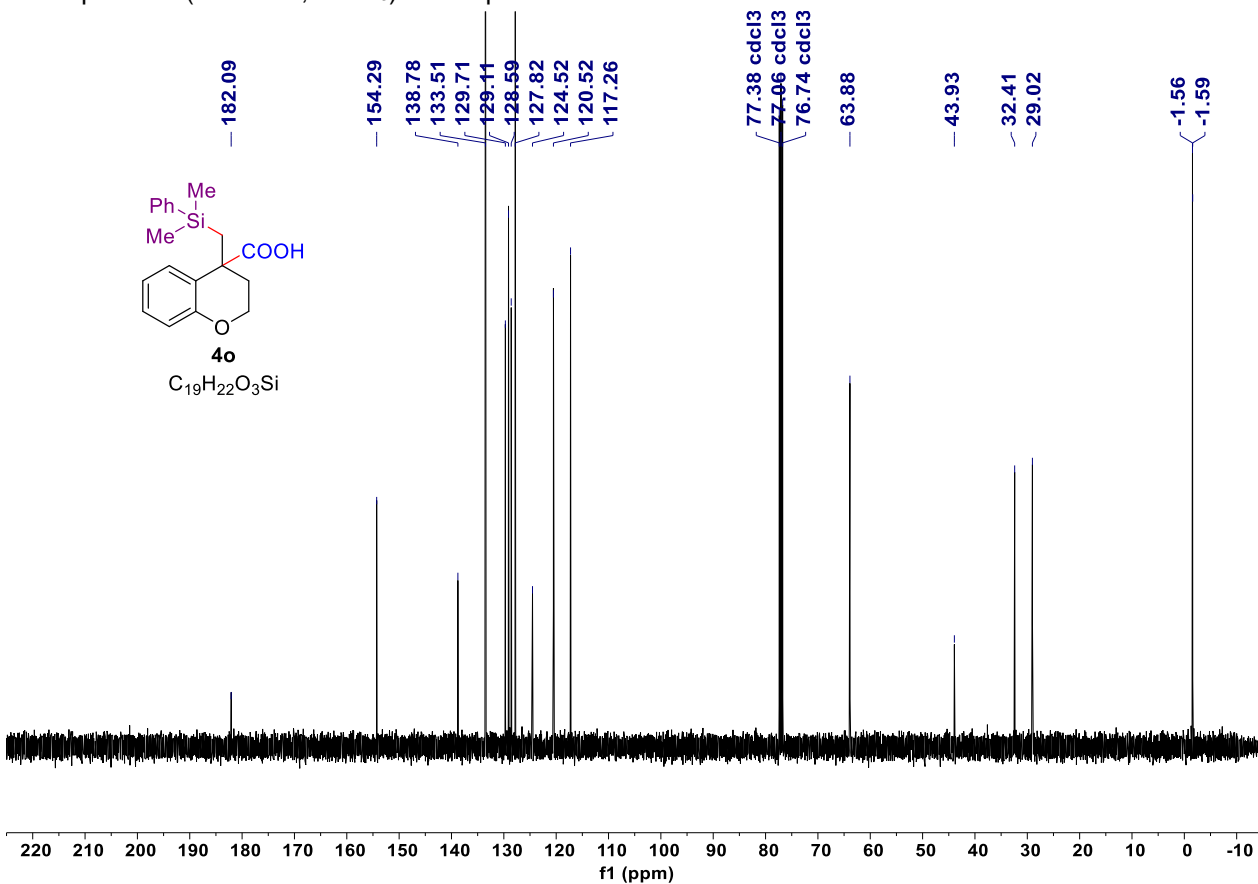

$^{13}\text{C}\{^1\text{H}\}$  NMR spectrum (100 MHz,  $\text{CDCl}_3$ ) of compound **4o**. gao-27-83ch.

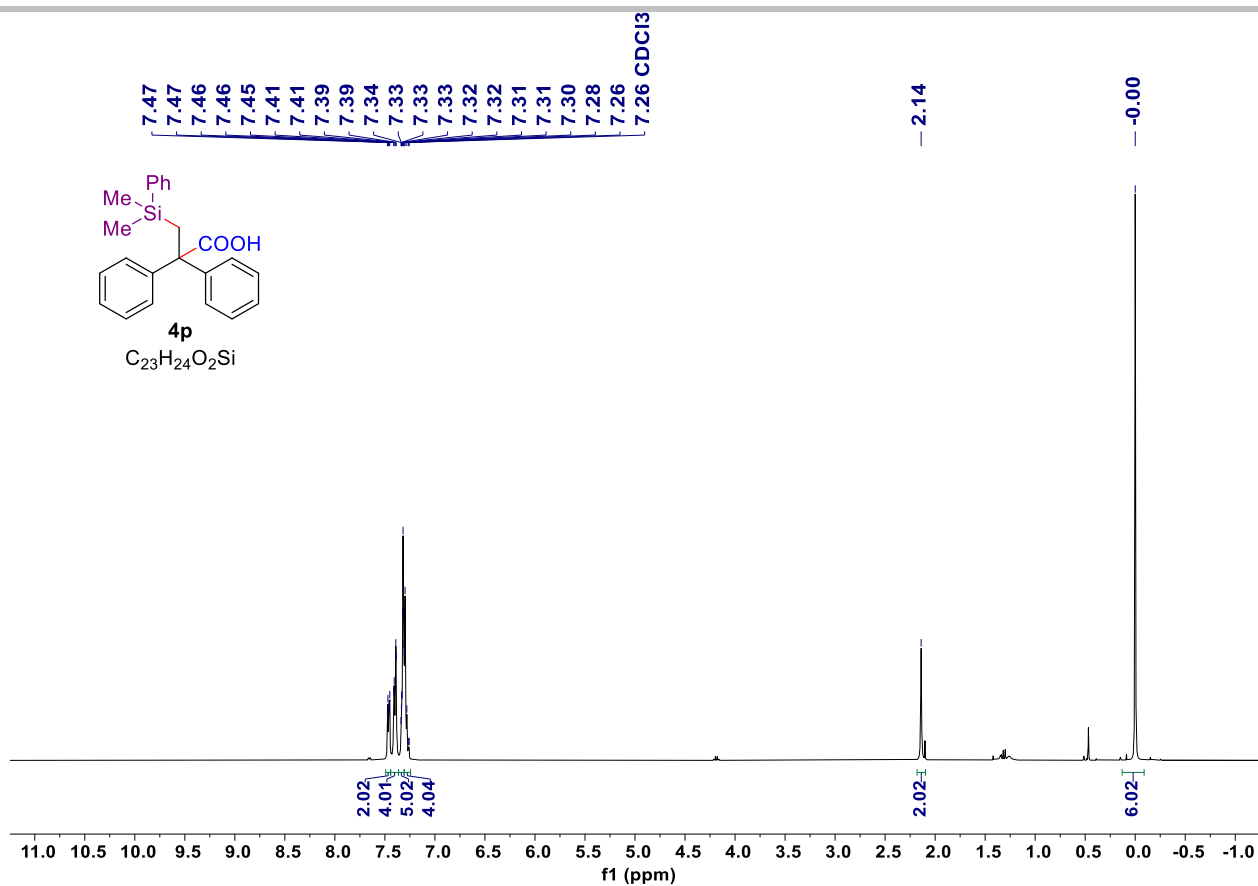

$^1H$  NMR spectrum (400 MHz,  $CDCl_3$ ) of compound **4p**.

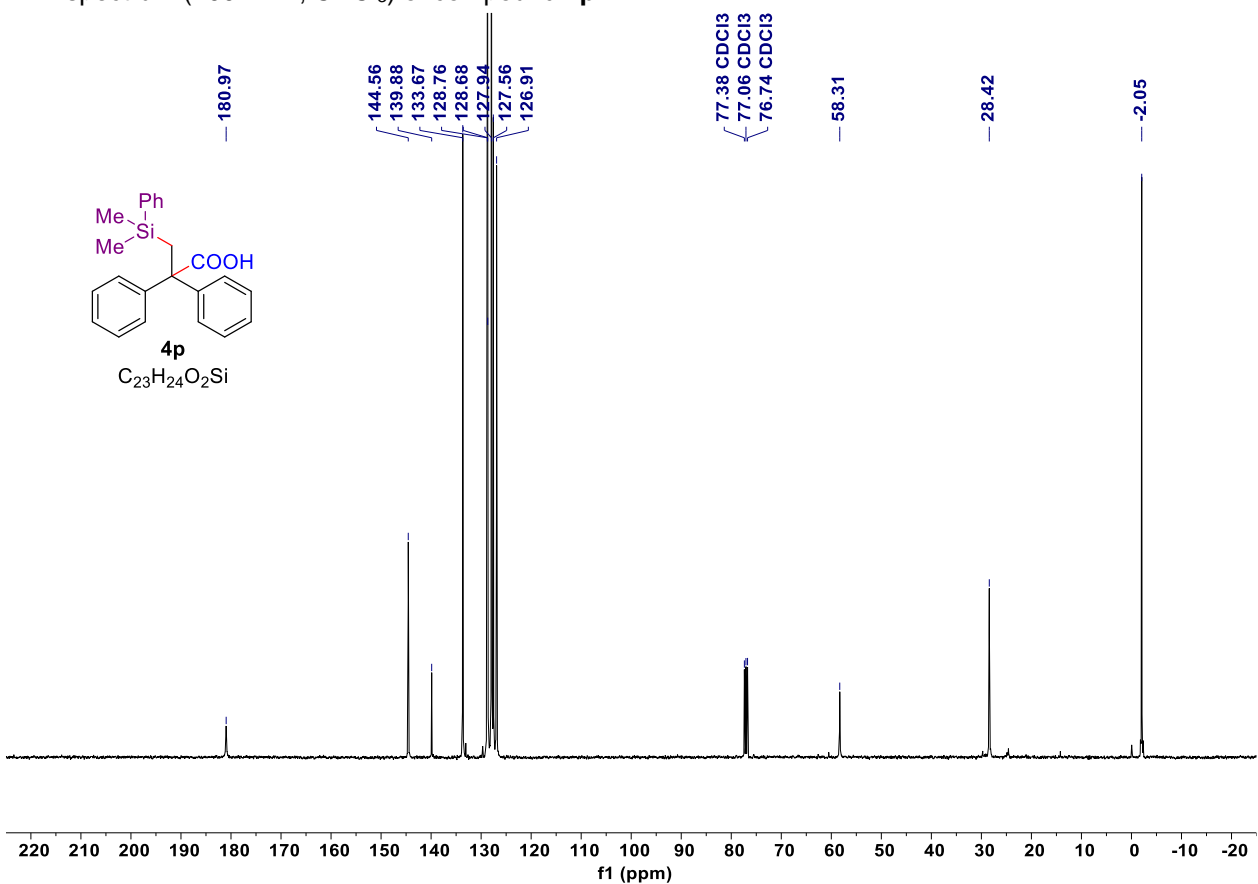

$^{13}C$  NMR spectrum (100 MHz,  $CDCl_3$ ) of compound **4p**. gao-22-127chr.

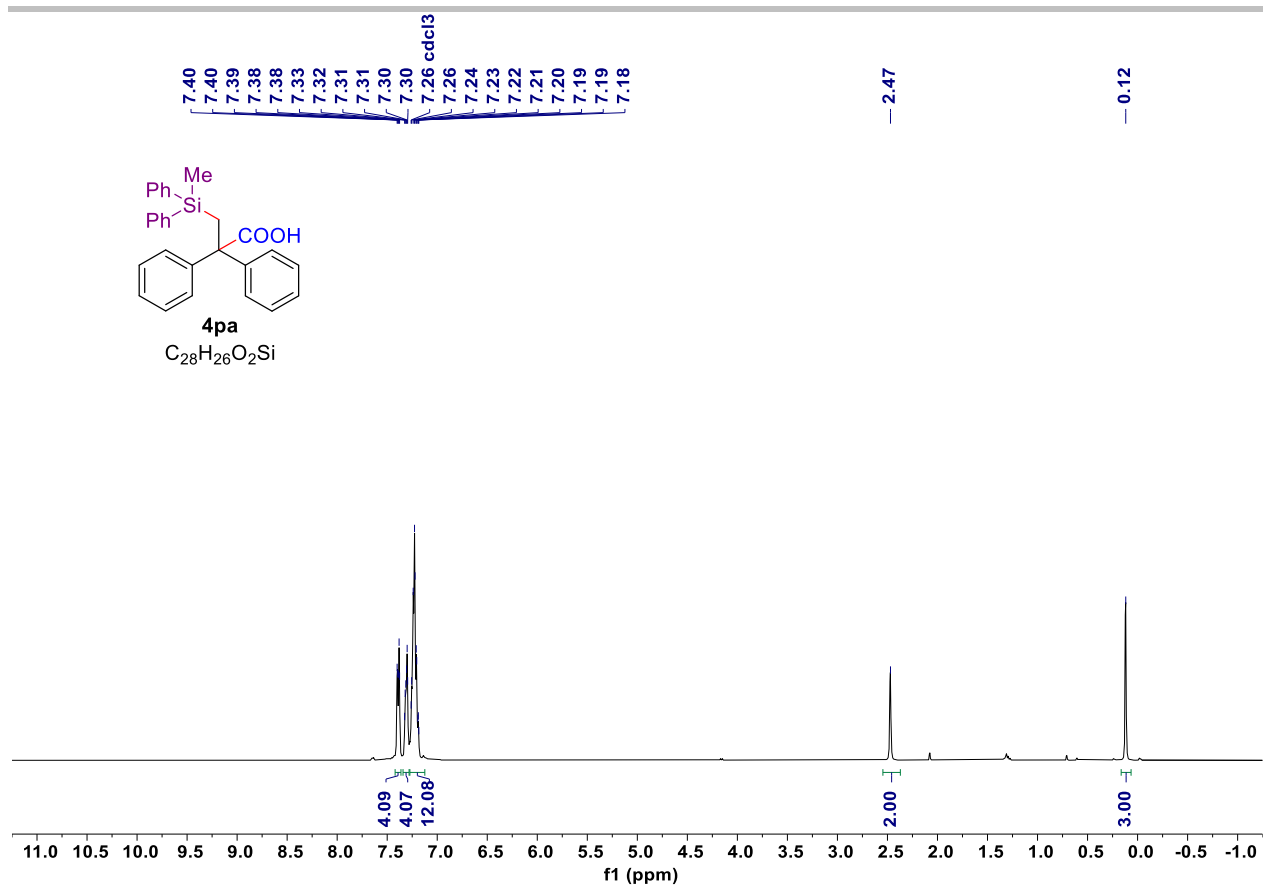

$^1H$  NMR spectrum (400 MHz,  $CDCl_3$ ) of compound **4pa**.

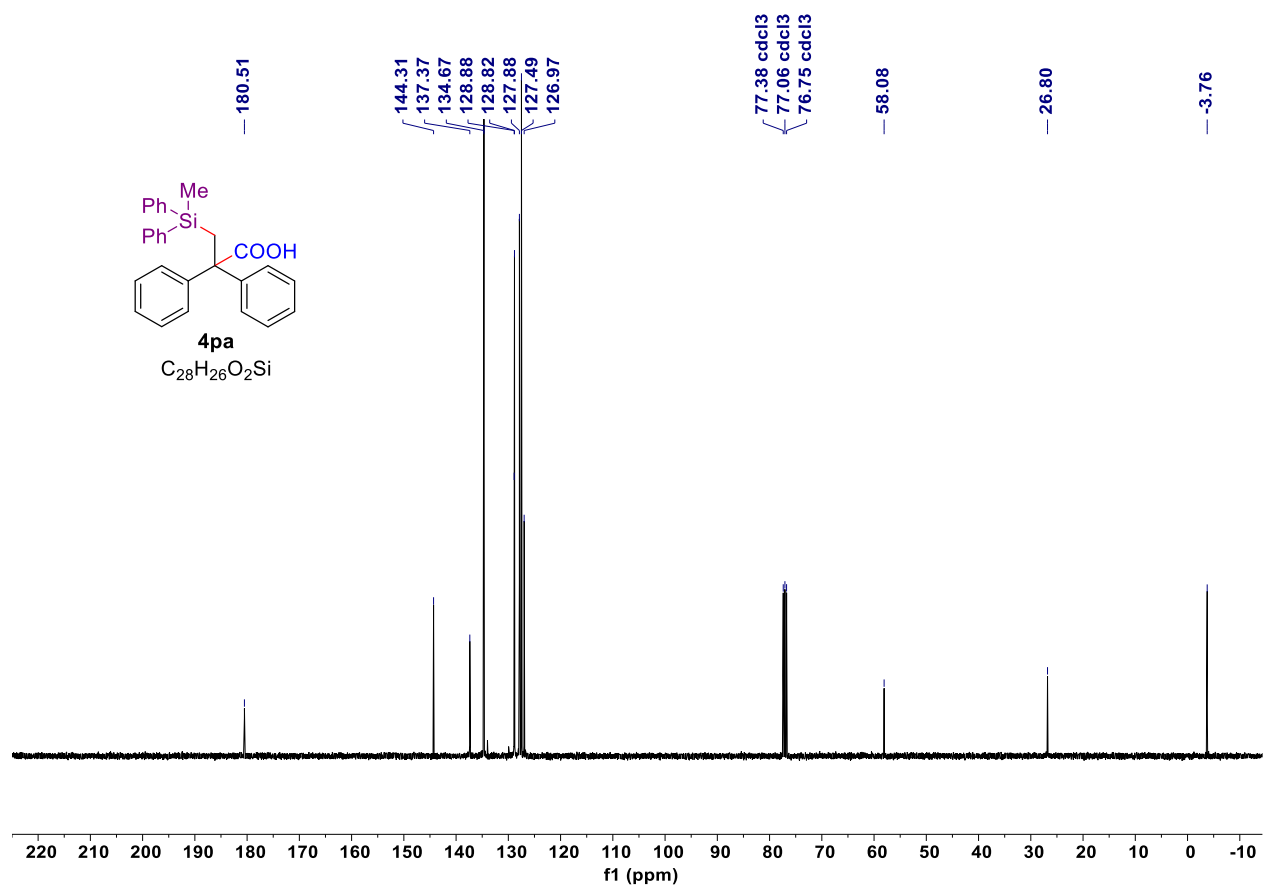

$^{13}C$  NMR spectrum (100 MHz,  $CDCl_3$ ) of compound **4pa**. gao-241120.



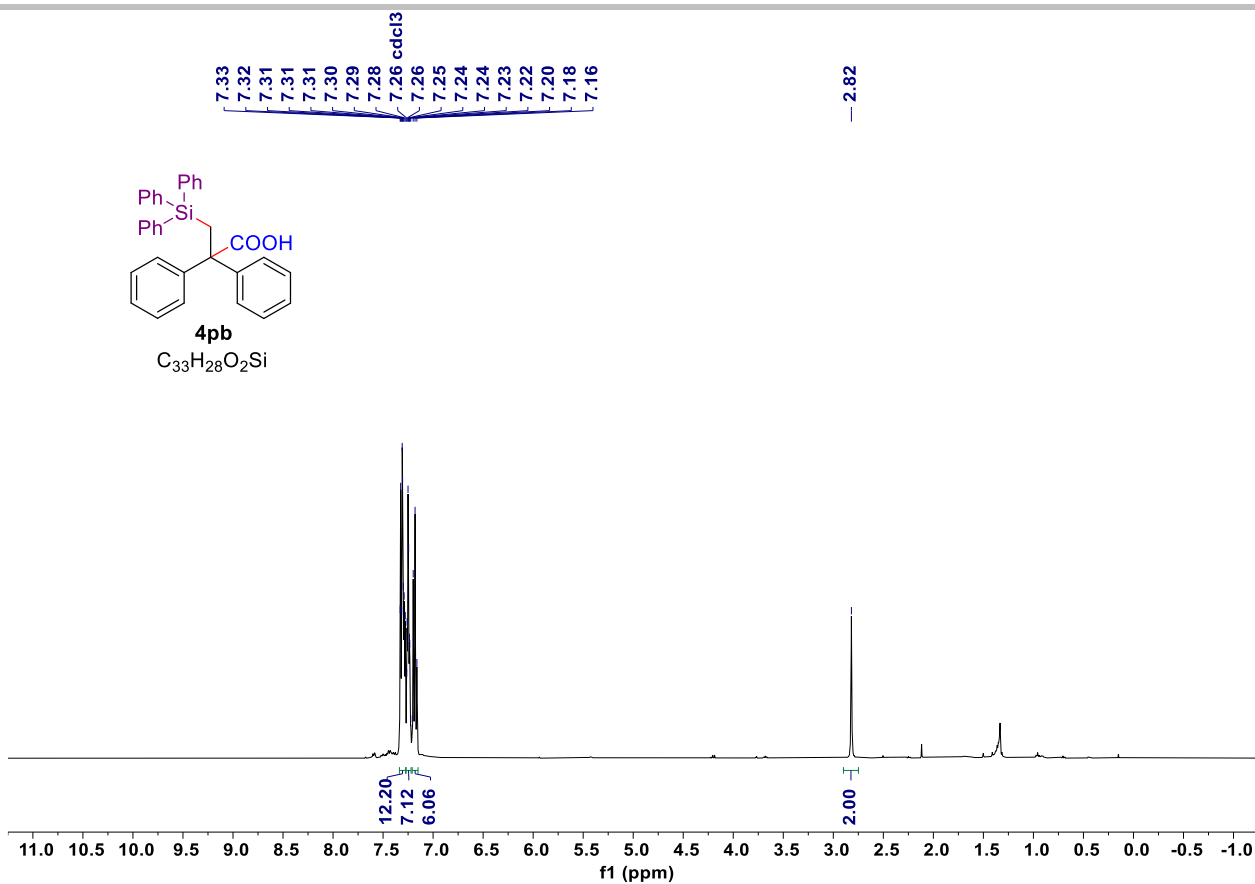

$^1H$  NMR spectrum (400 MHz,  $CDCl_3$ ) of compound **4pb**.

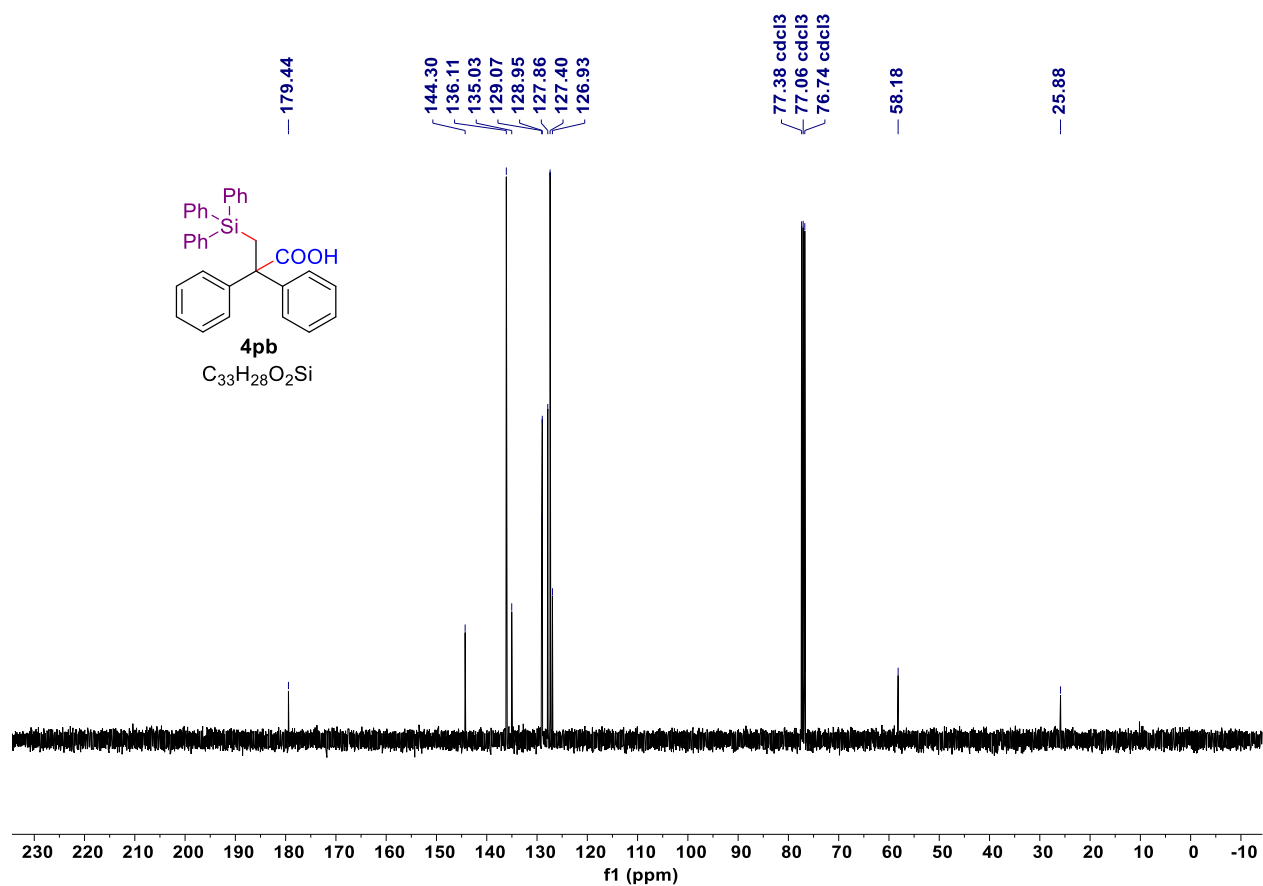

$^{13}C$  NMR spectrum (100 MHz,  $CDCl_3$ ) of compound **4pb**. gao-241121.

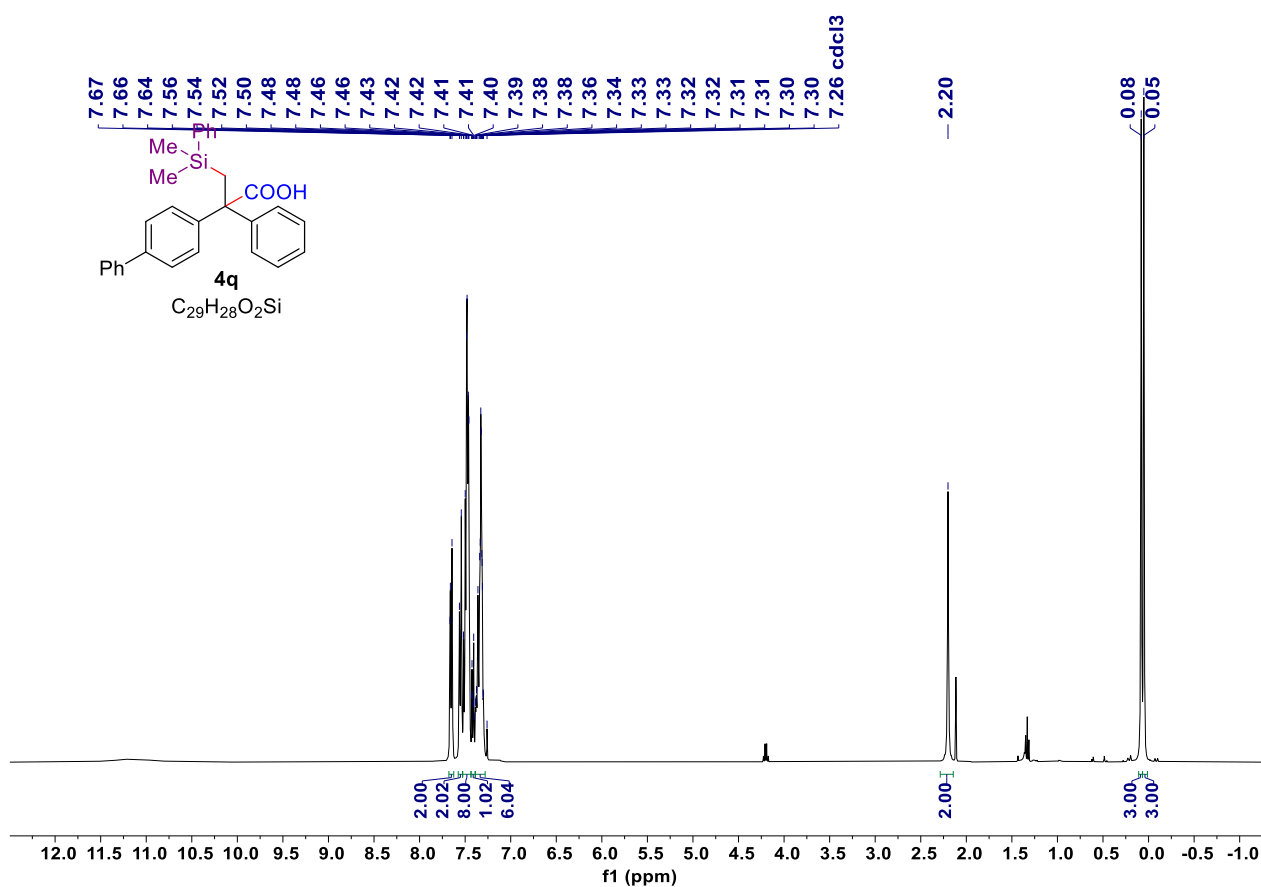

**<sup>1</sup>H NMR spectrum (400 MHz, CDCl<sub>3</sub>) of compound 4q.**

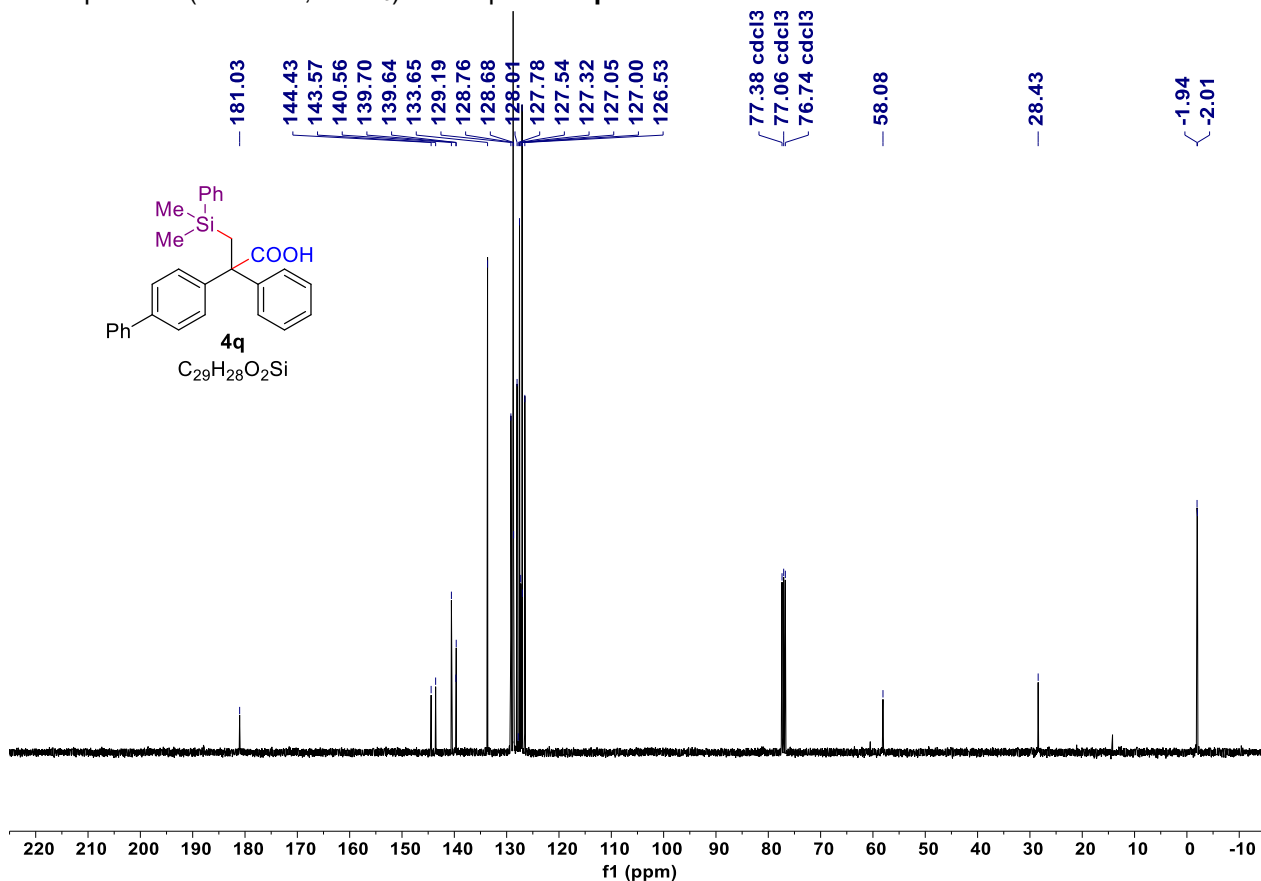

**<sup>13</sup>C NMR spectrum (100 MHz, CDCl<sub>3</sub>) of compound 4q. gao-27-119ch.**

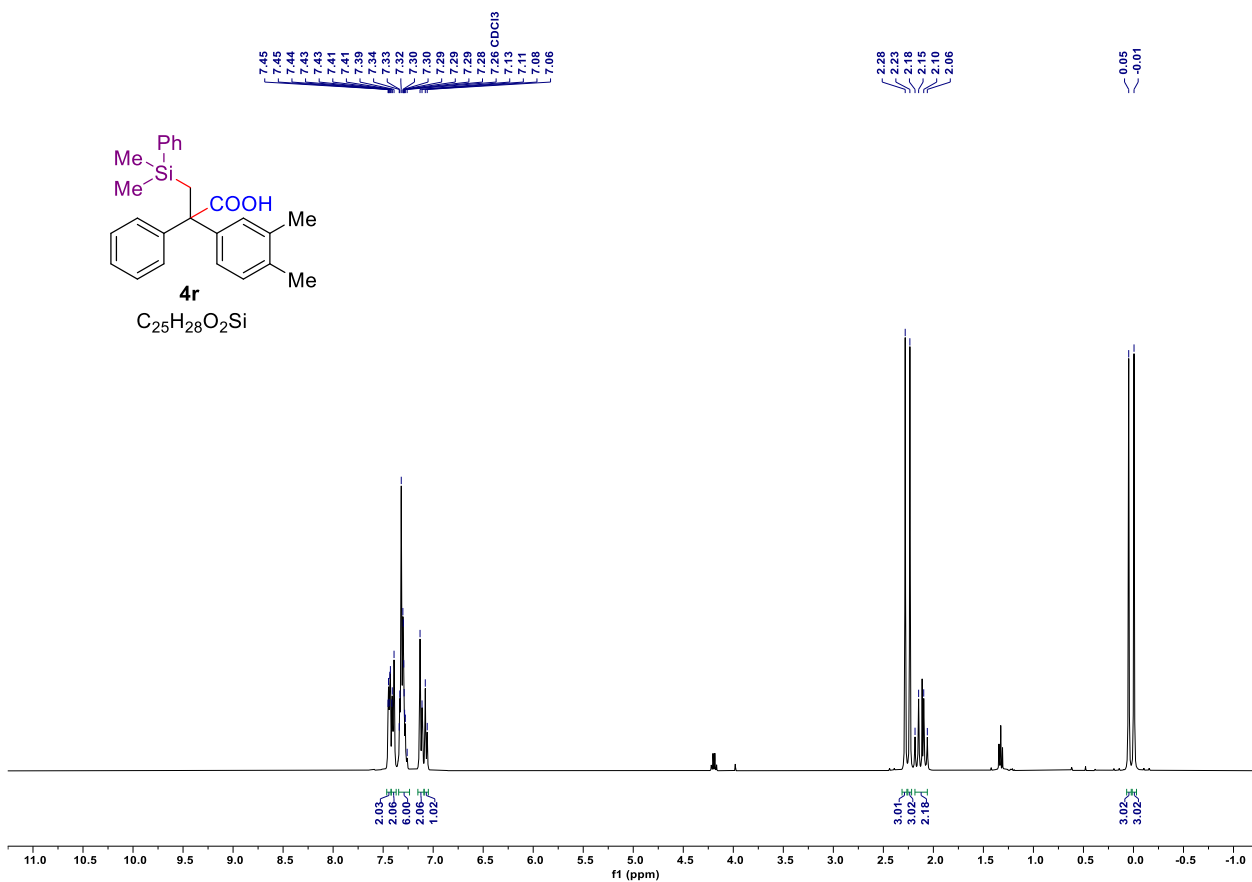

$^1H$  NMR spectrum (400 MHz,  $CDCl_3$ ) of compound **4r**.

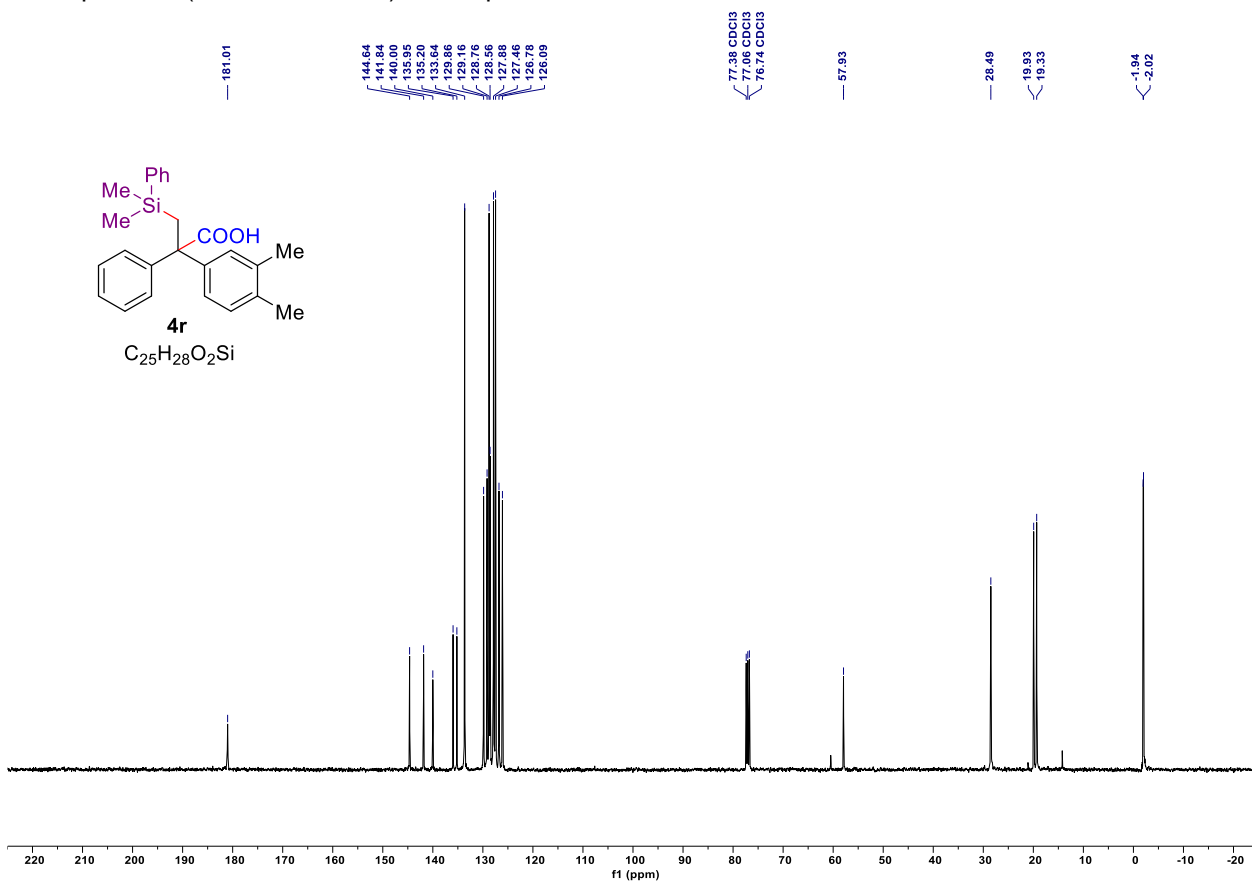

$^{13}C$  NMR spectrum (100 MHz,  $CDCl_3$ ) of compound **4r**. gao-27-43ch.

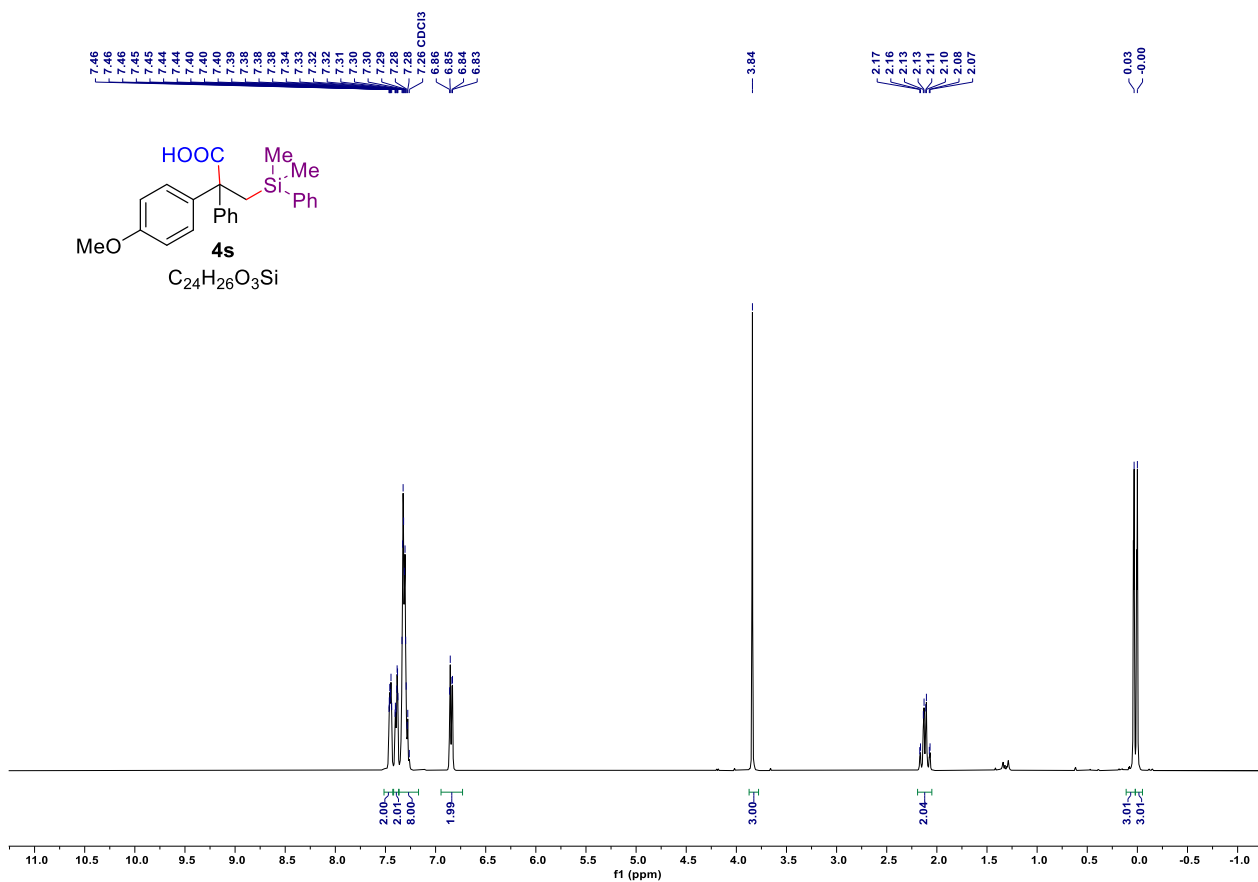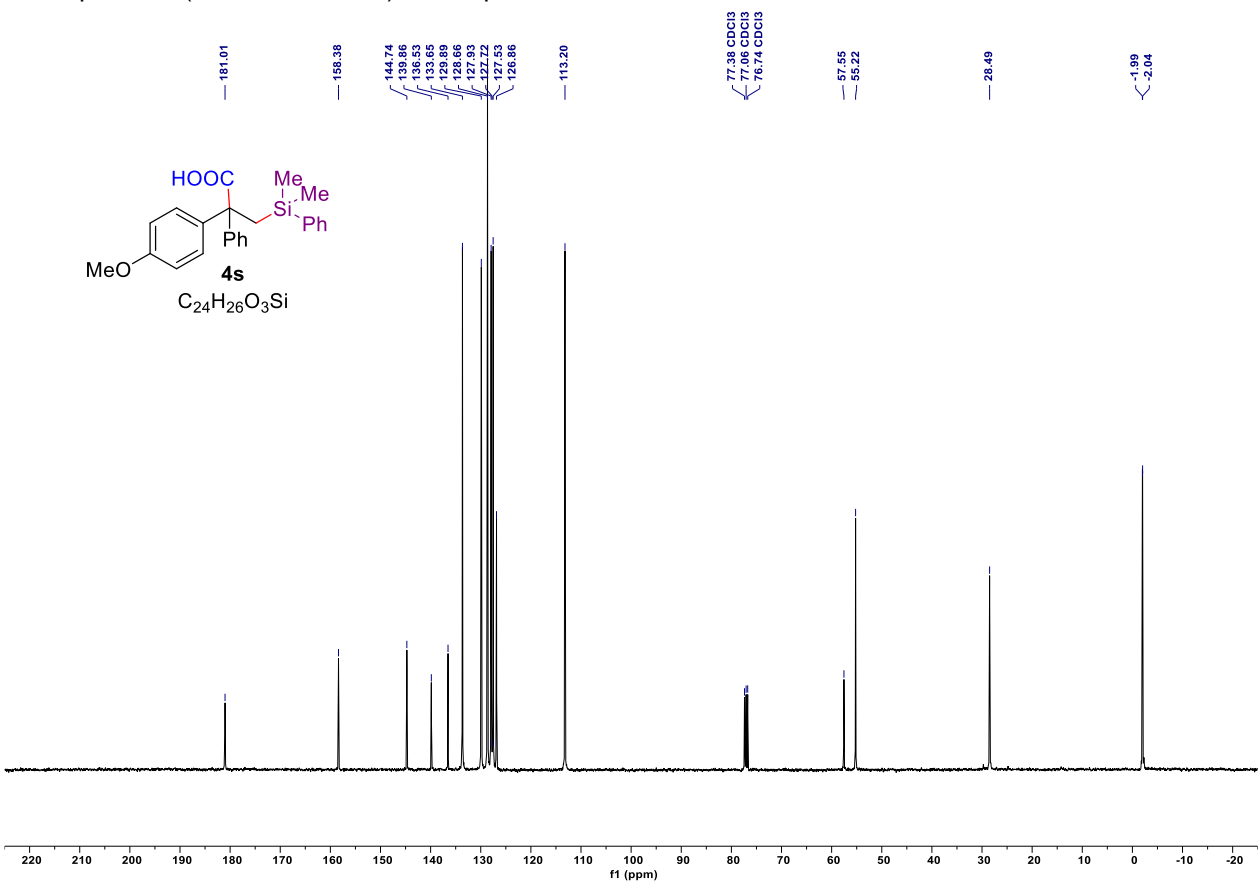

$^{13}C$  NMR spectrum (100 MHz,  $CDCl_3$ ) of compound **4s**. gao-27-3ch.

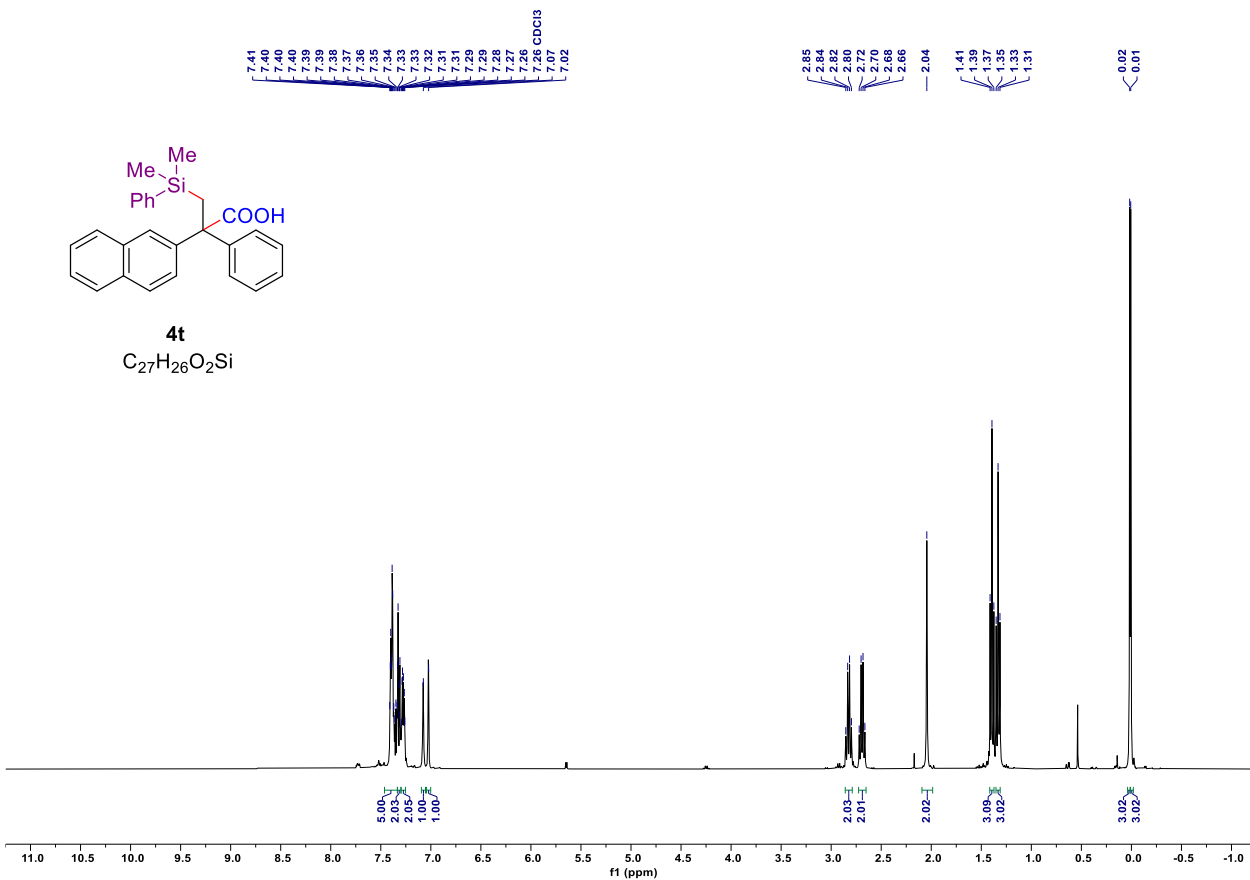

$^1H$  NMR spectrum (400 MHz,  $CDCl_3$ ) of compound **4t**.

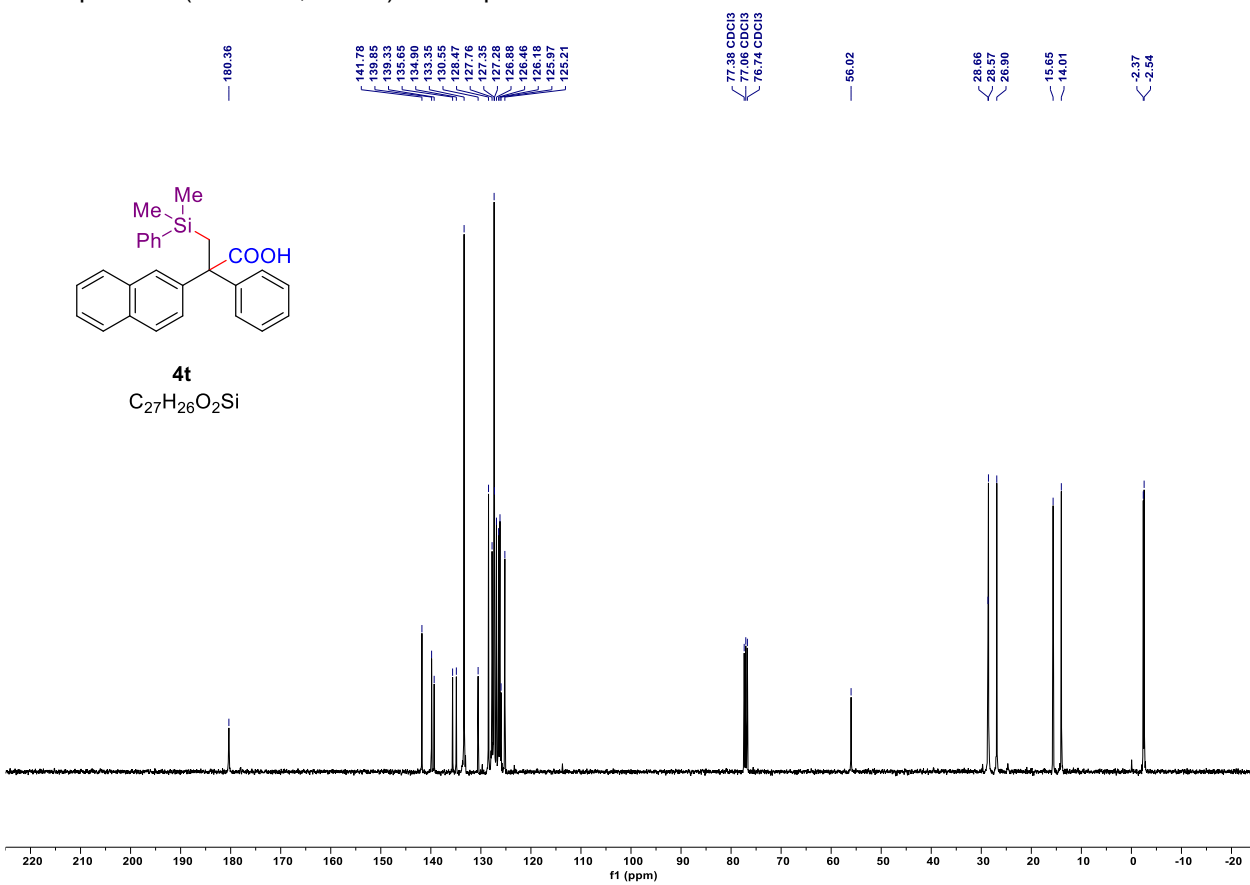

$^{13}\text{C}\{^1\text{H}\}$  NMR spectrum (100 MHz,  $\text{CDCl}_3$ ) of compound **4t**. gao-27-118ch

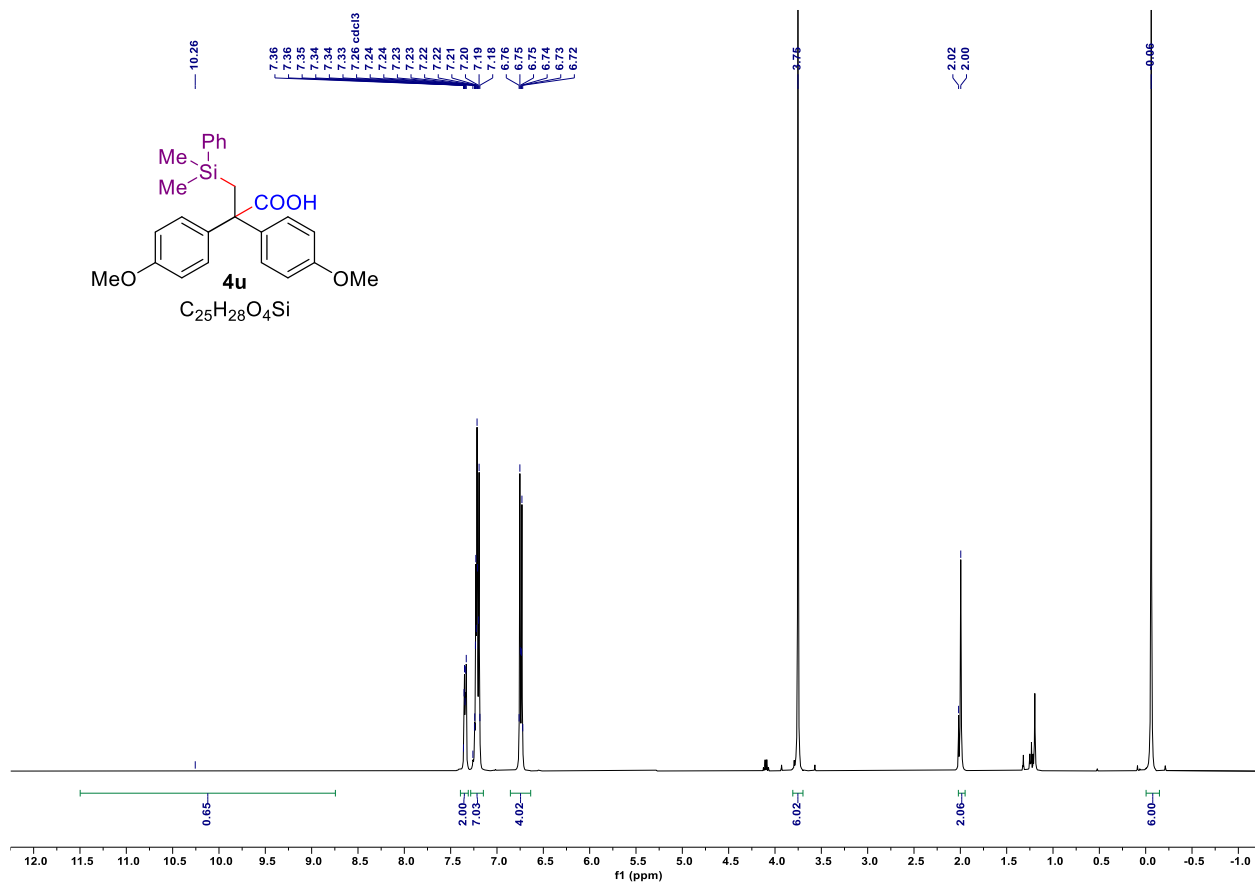

$^1\text{H}$  NMR spectrum (400 MHz,  $\text{CDCl}_3$ ) of compound **4u**.

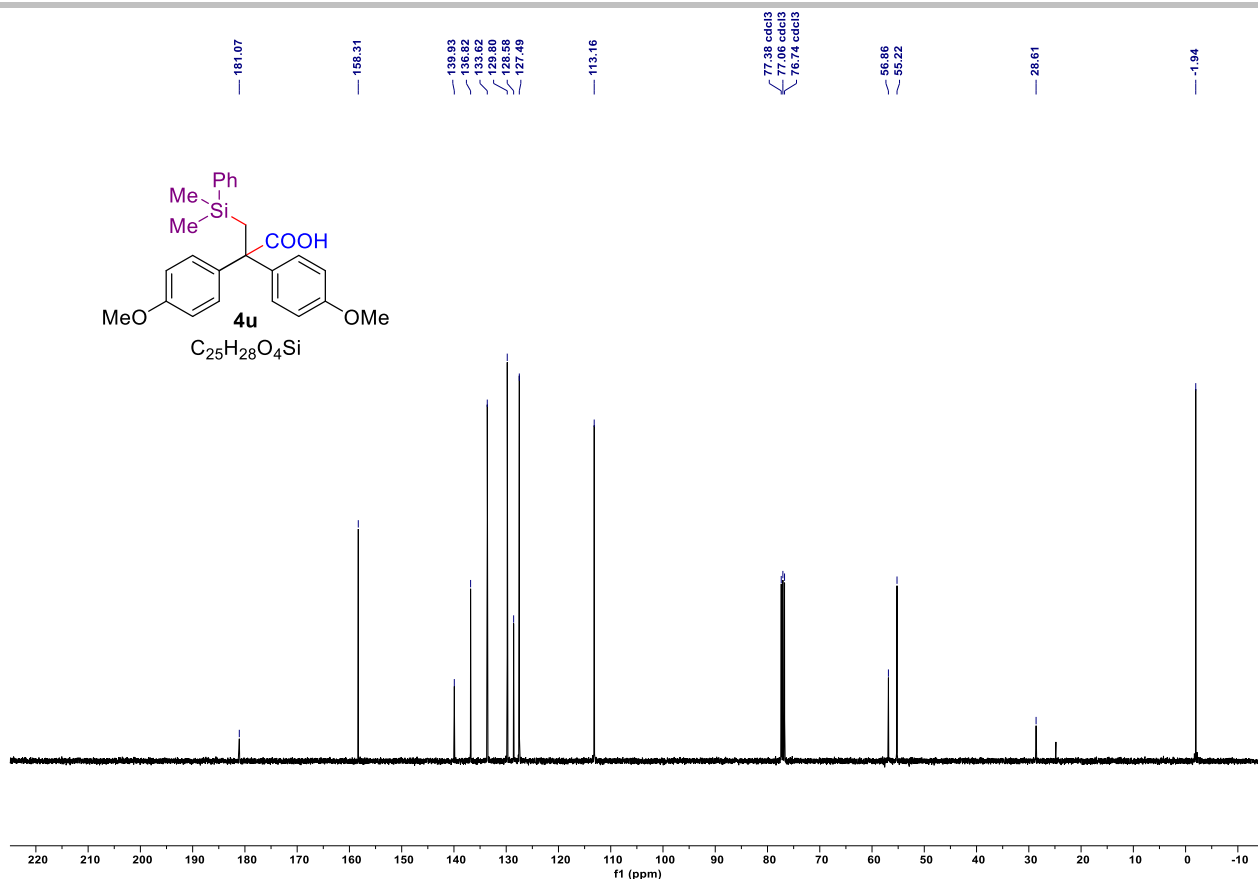

$^{13}C$ { $^1H$ } NMR spectrum (100 MHz,  $CDCl_3$ ) of compound **4u**.

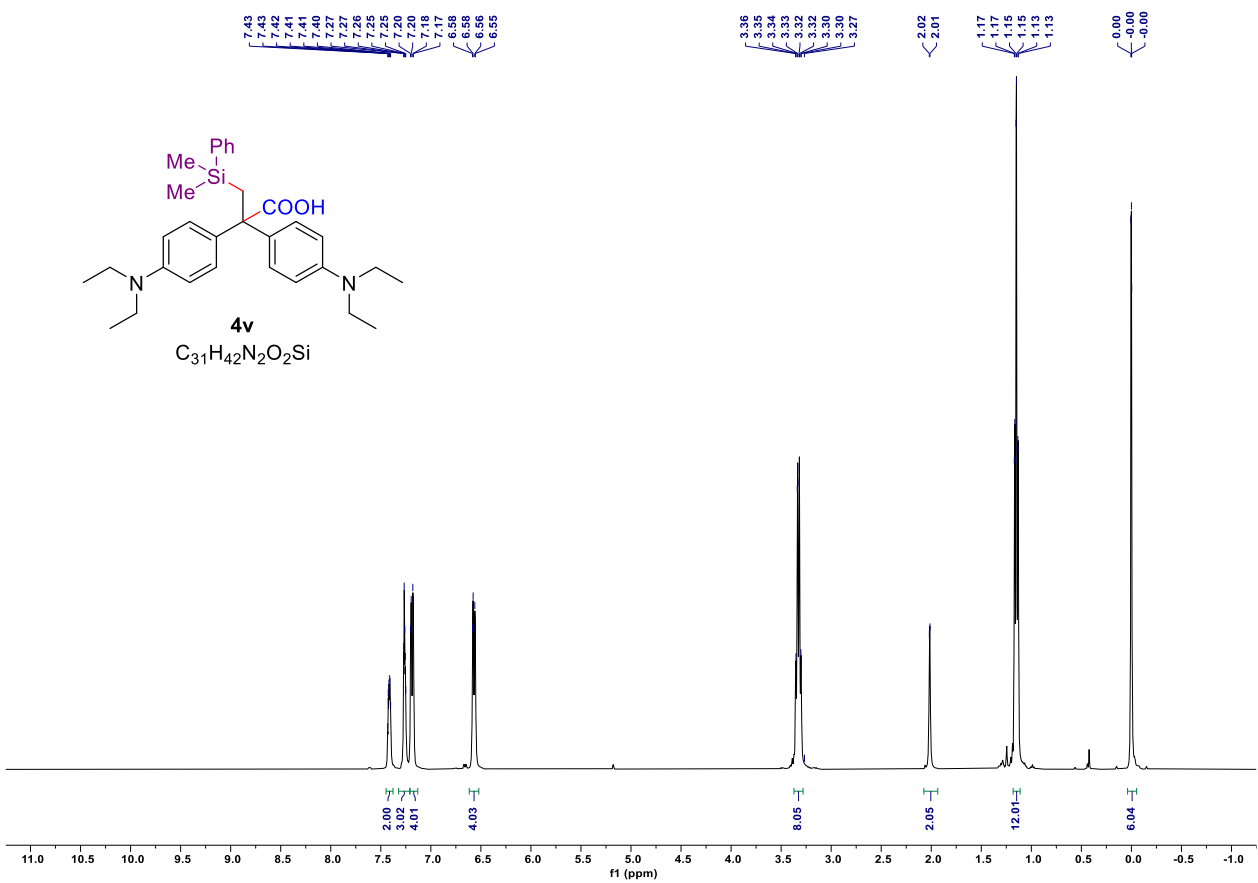

<sup>1</sup>H NMR spectrum (400 MHz, CDCl<sub>3</sub>) of compound **4v**.

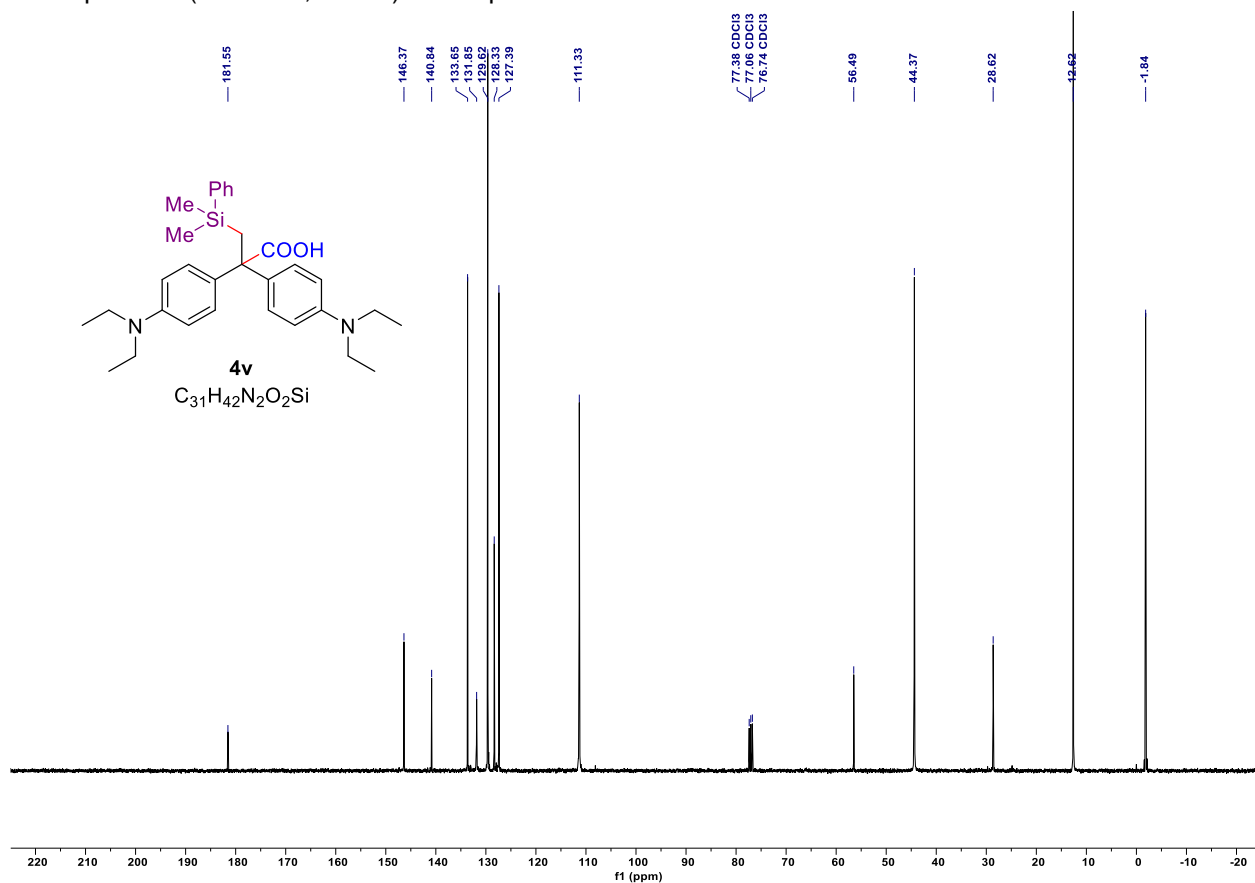

<sup>13</sup>C{<sup>1</sup>H} NMR spectrum (100 MHz, CDCl<sub>3</sub>) of compound **4v**.



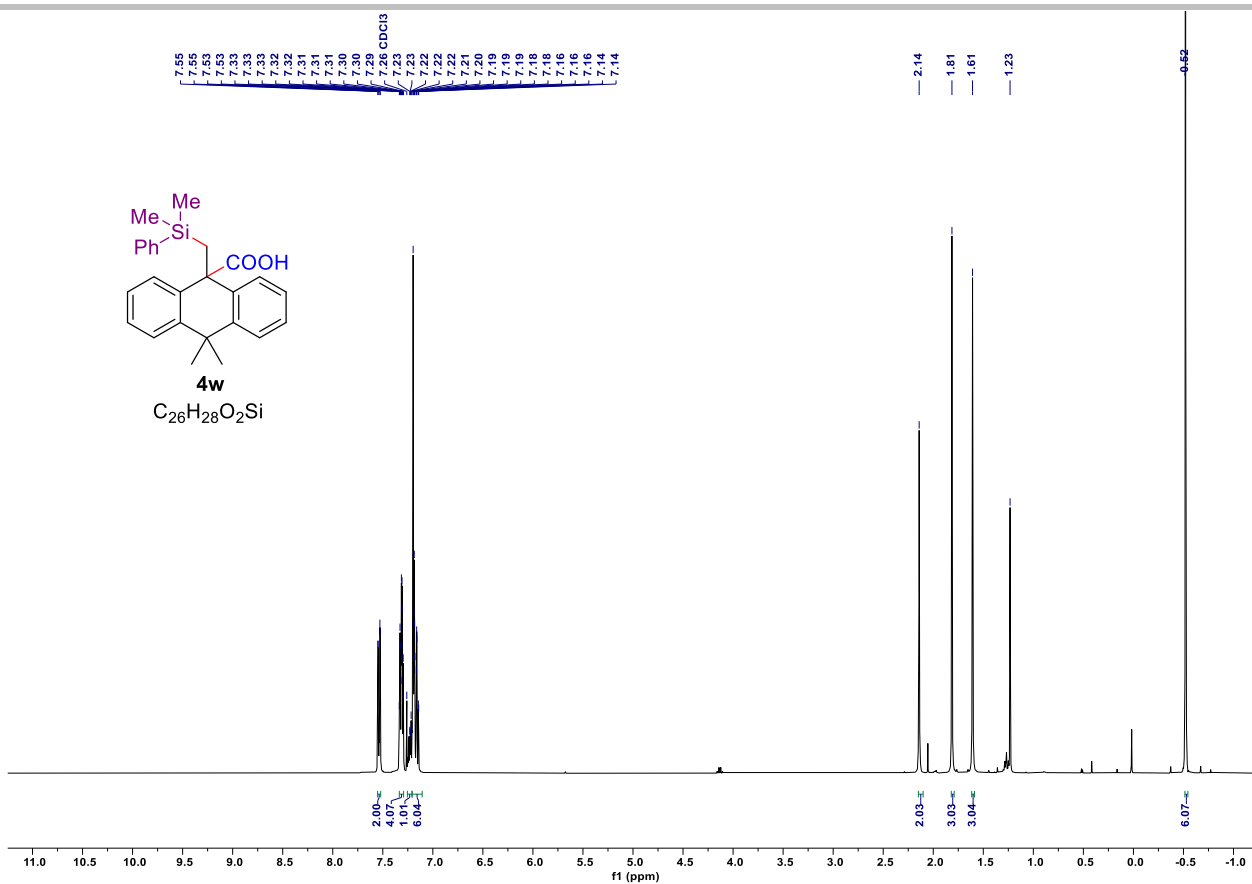

**<sup>1</sup>H NMR spectrum (400 MHz, CDCl<sub>3</sub>) of compound 4w.**

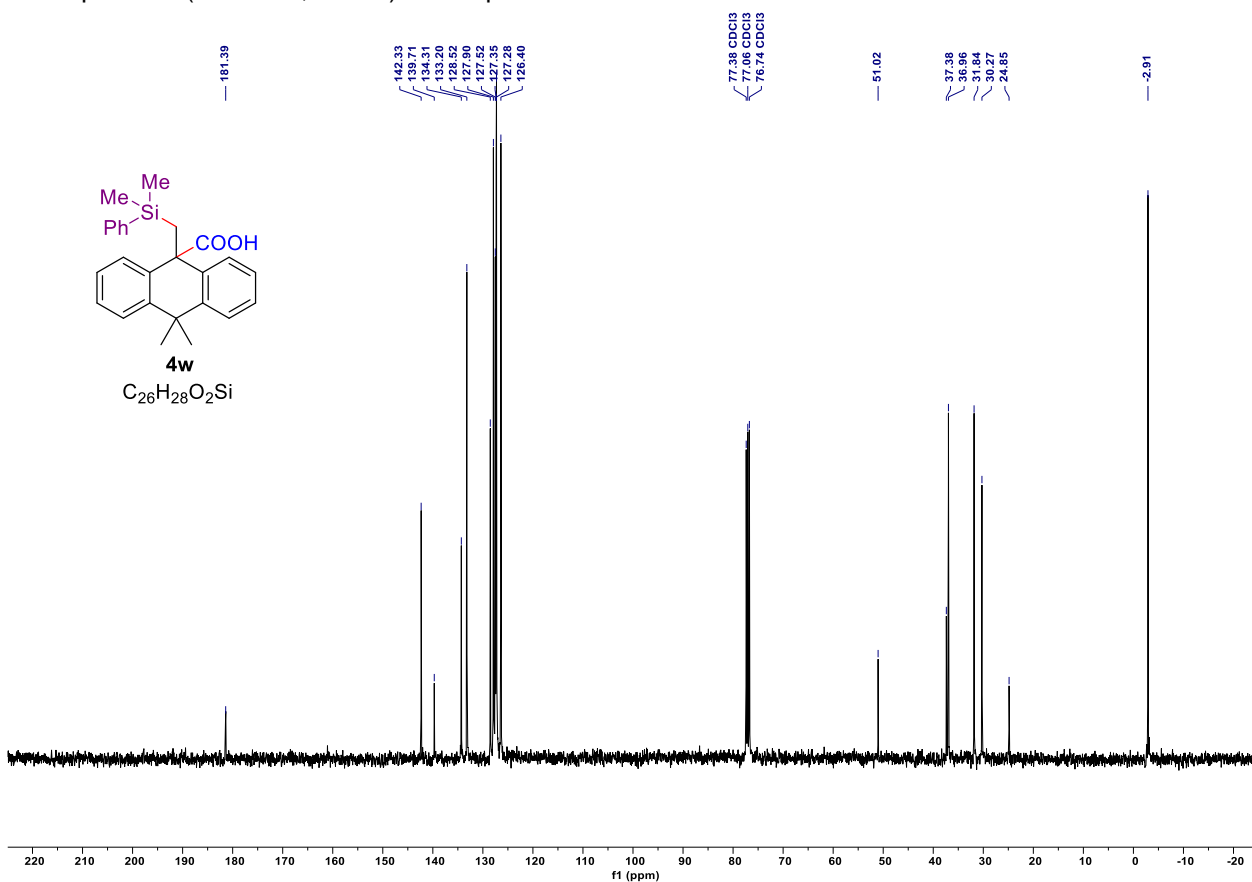

**<sup>13</sup>C NMR spectrum (100 MHz, CDCl<sub>3</sub>) of compound 4w. gao-27-5ch**

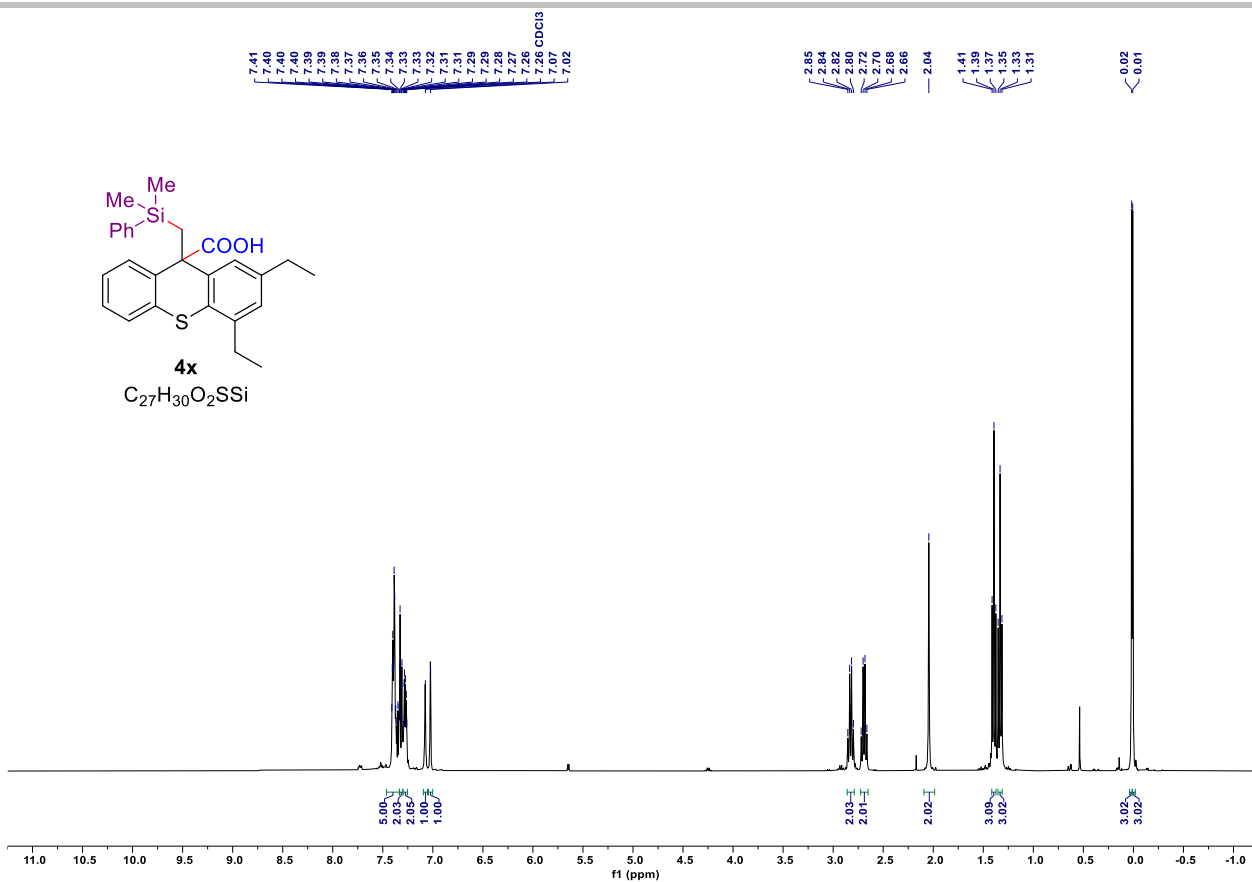

**<sup>1</sup>H NMR spectrum (400 MHz, CDCl<sub>3</sub>) of compound 4x.**

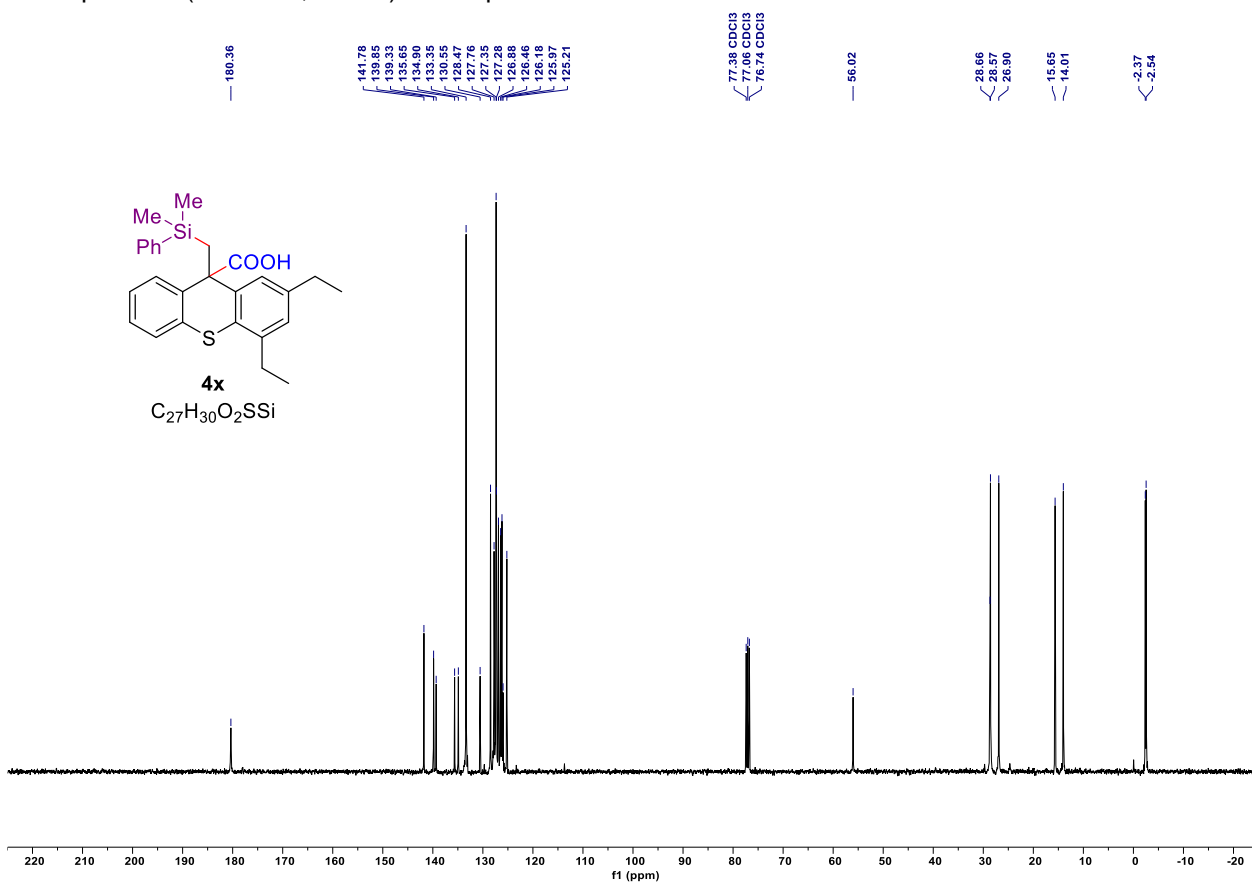

**<sup>13</sup>C{<sup>1</sup>H} NMR spectrum (100 MHz, CDCl<sub>3</sub>) of compound 4x. gao-27-4ch**

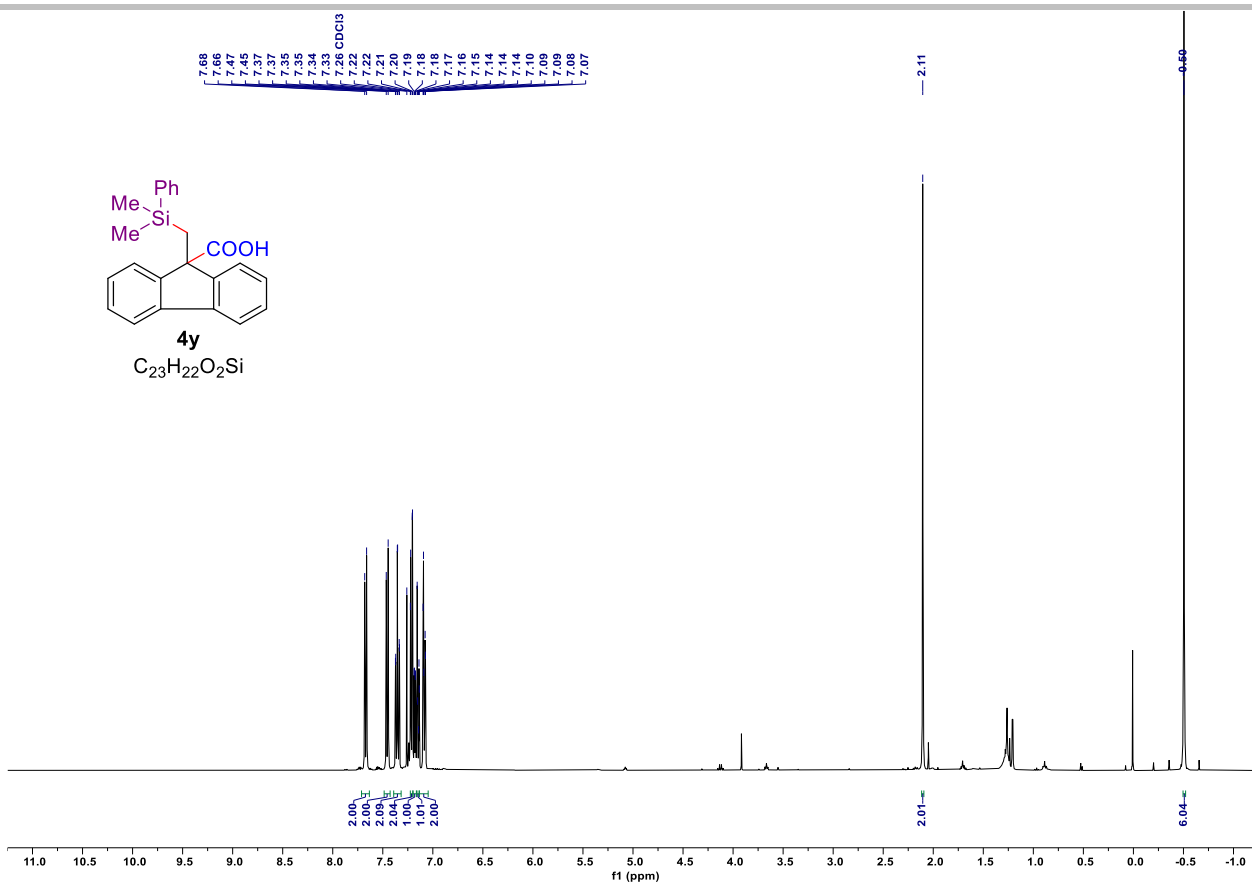

$^1H$  NMR spectrum (400 MHz,  $CDCl_3$ ) of compound **4y**.

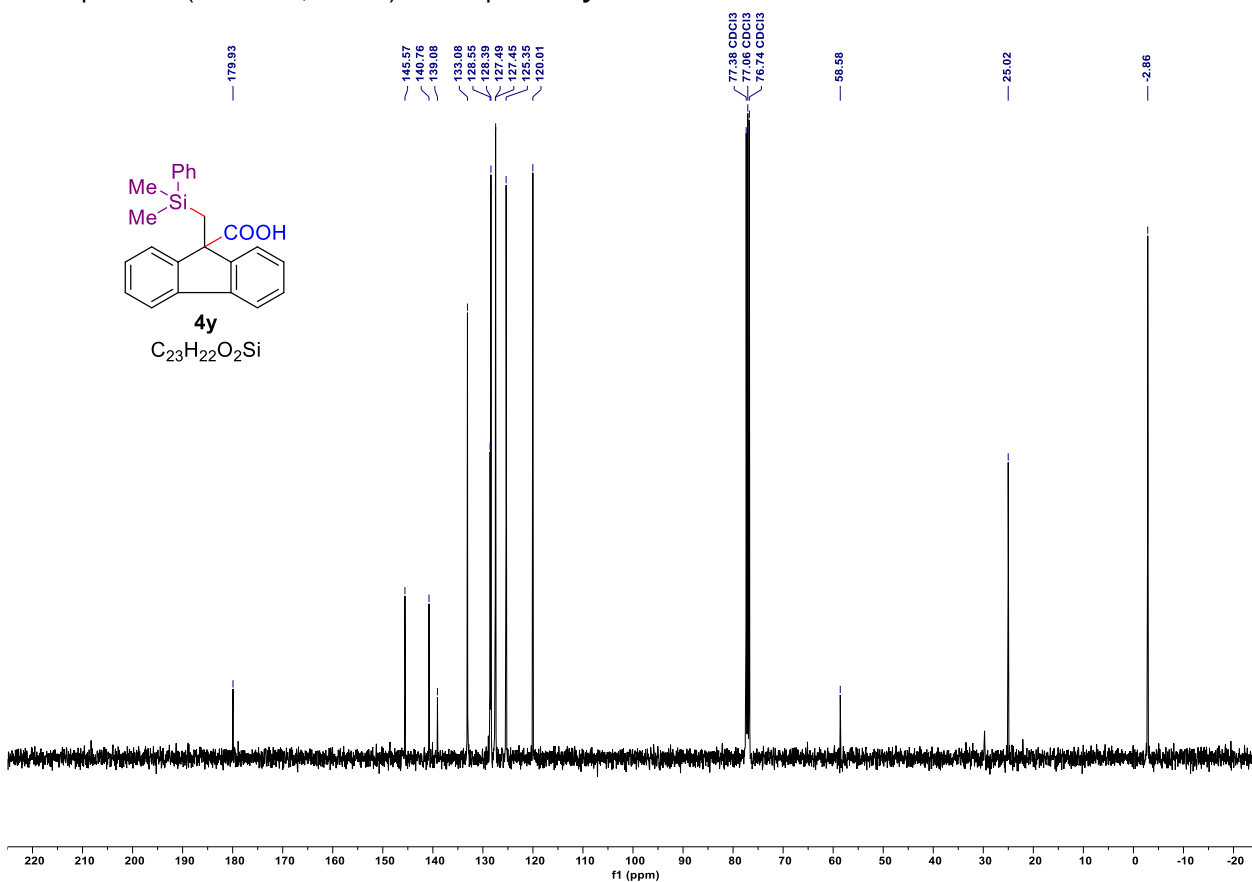

$^{13}C\{^1H\}$  NMR spectrum (100 MHz,  $CDCl_3$ ) of compound **4y**. gao-27-7ch2.

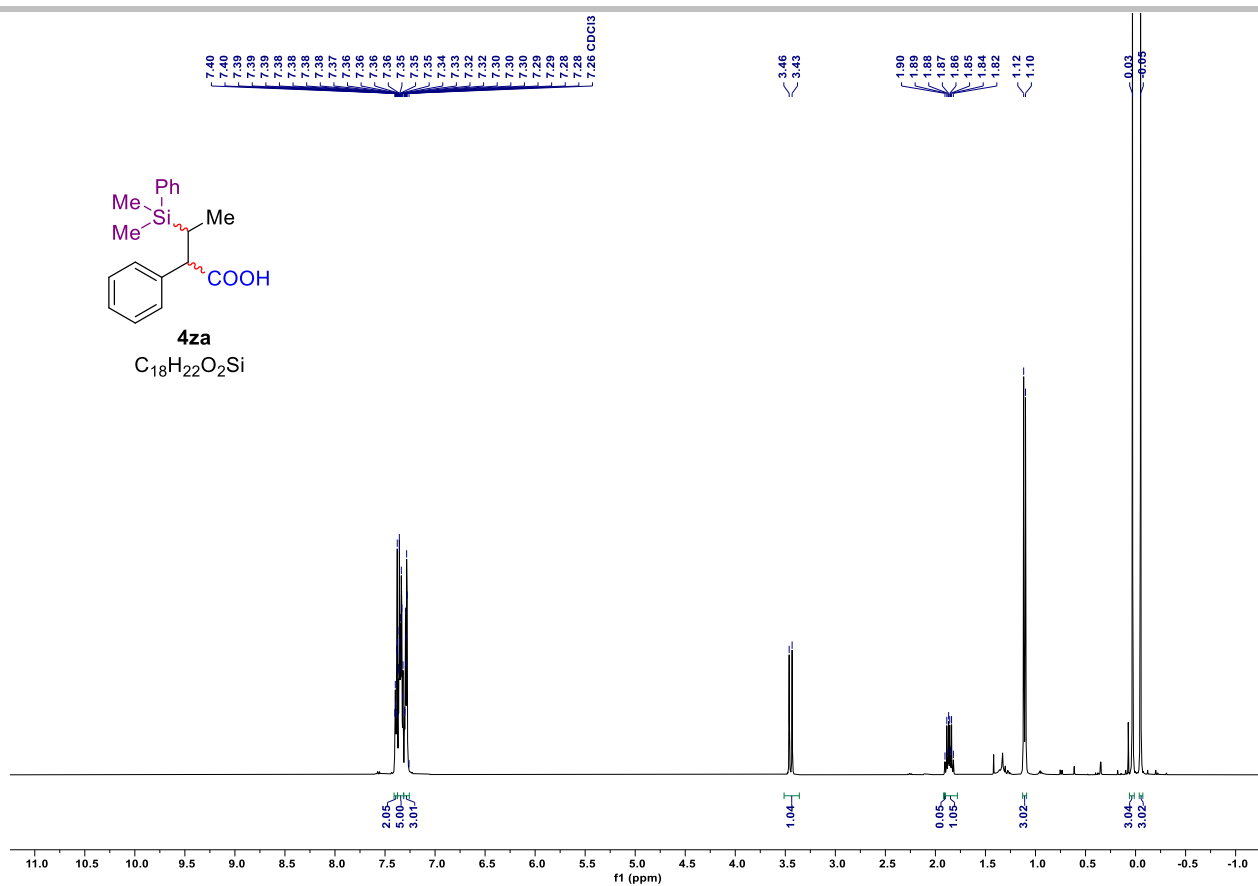

$^1H$  NMR spectrum (400 MHz,  $CDCl_3$ ) of compound **4za**.

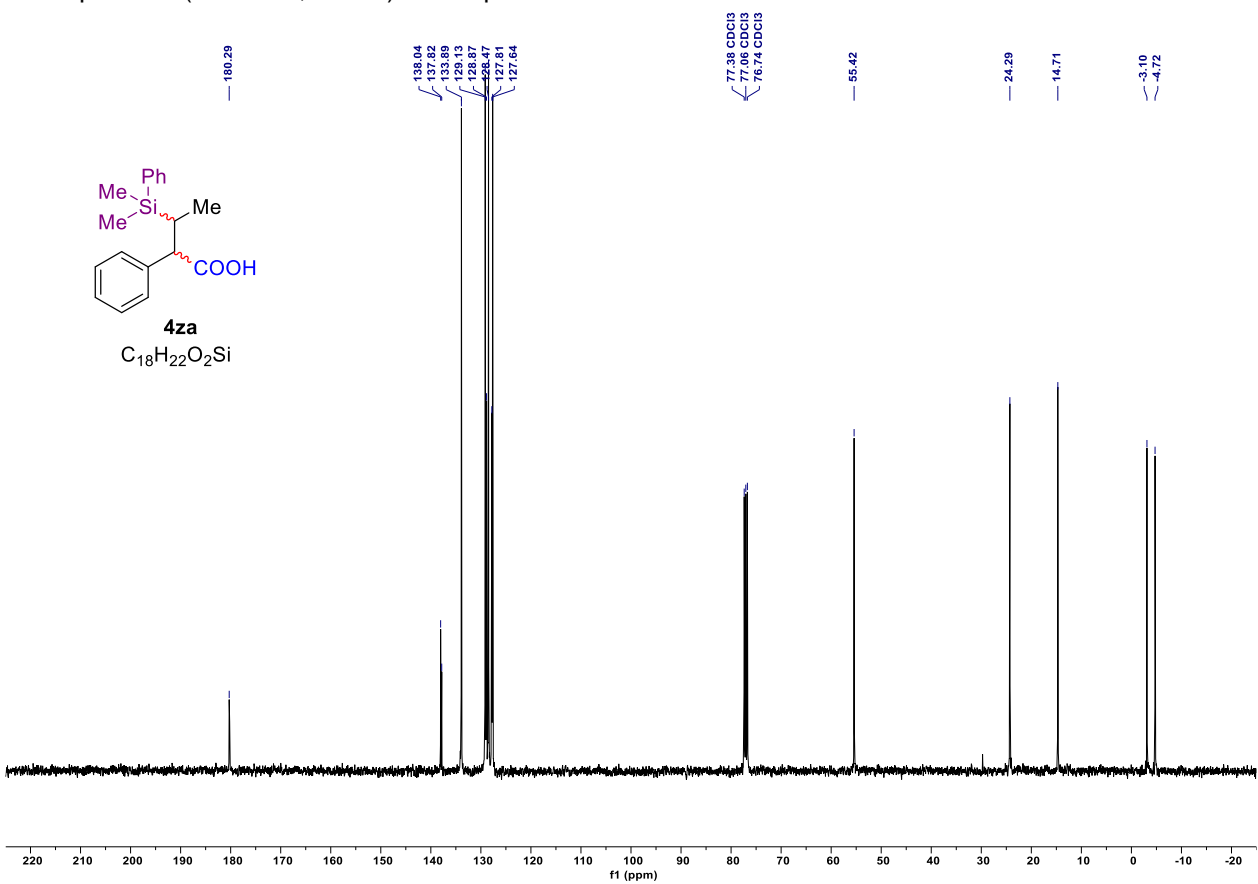

$^{13}C\{^1H\}$  NMR spectrum (100 MHz,  $CDCl_3$ ) of compound **4za**. gao-27-8ch2.

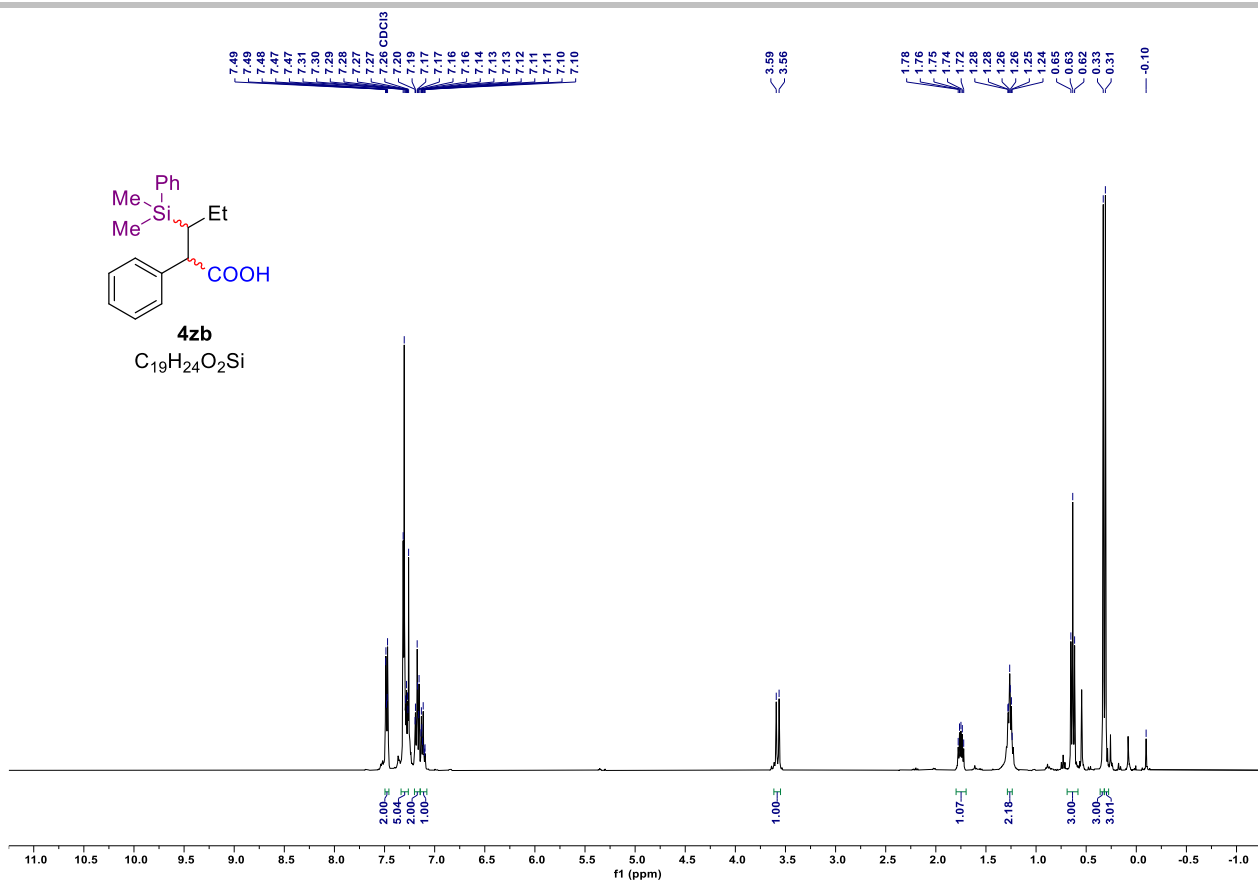

<sup>1</sup>H NMR spectrum (400 MHz, CDCl<sub>3</sub>) of compound **4zb**.

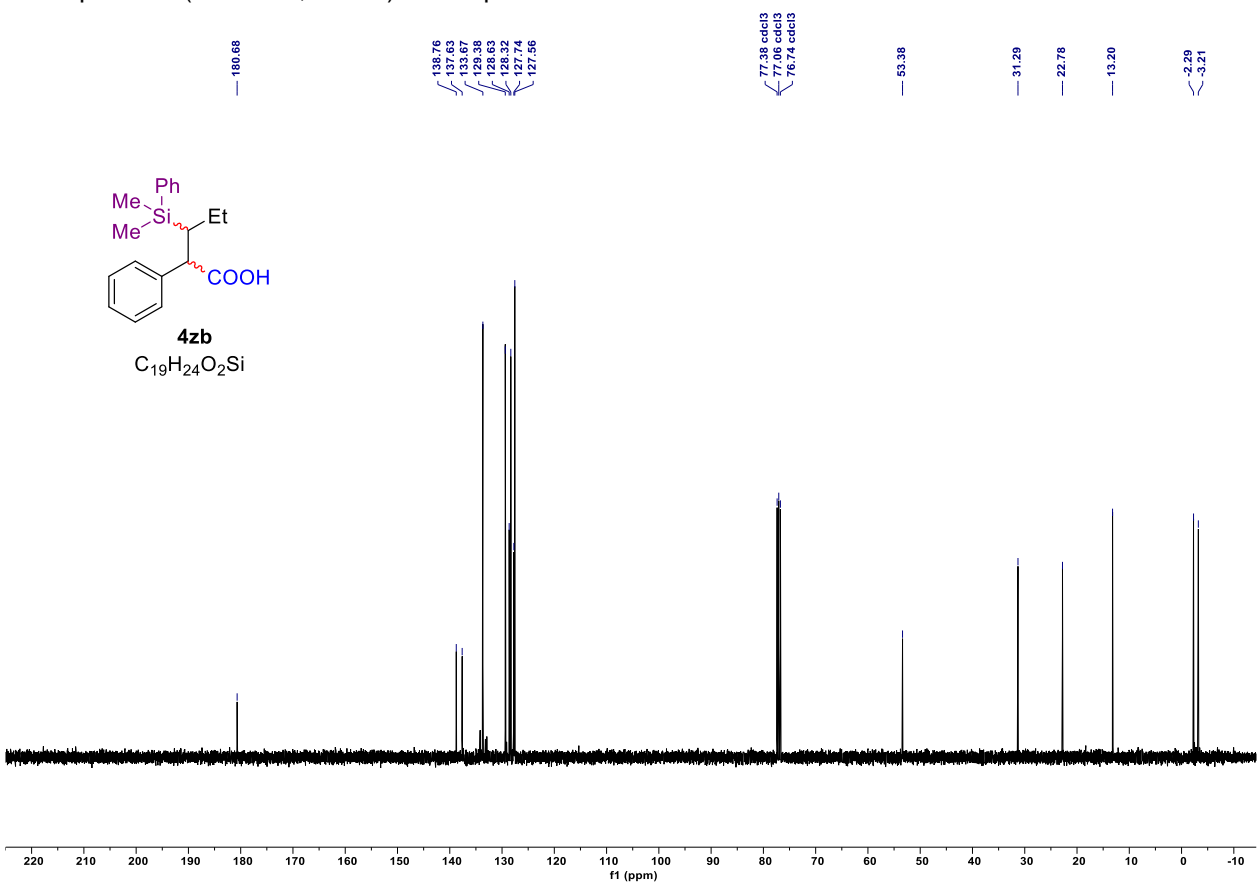

<sup>13</sup>C NMR spectrum (100 MHz, CDCl<sub>3</sub>) of compound **4zb**. gao-27-103ch2.

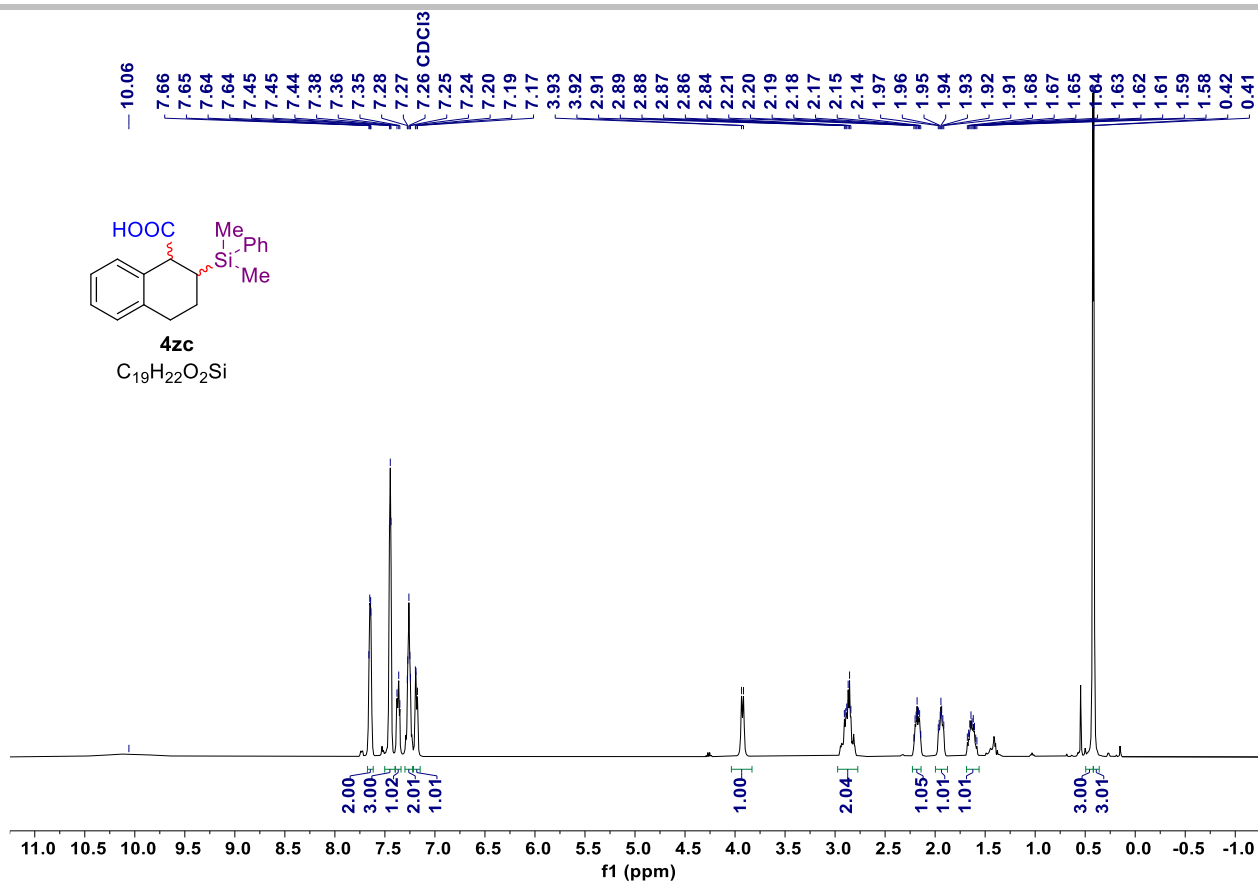

**$^1H$  NMR spectrum (400 MHz,  $CDCl_3$ ) of compound 4zc.**

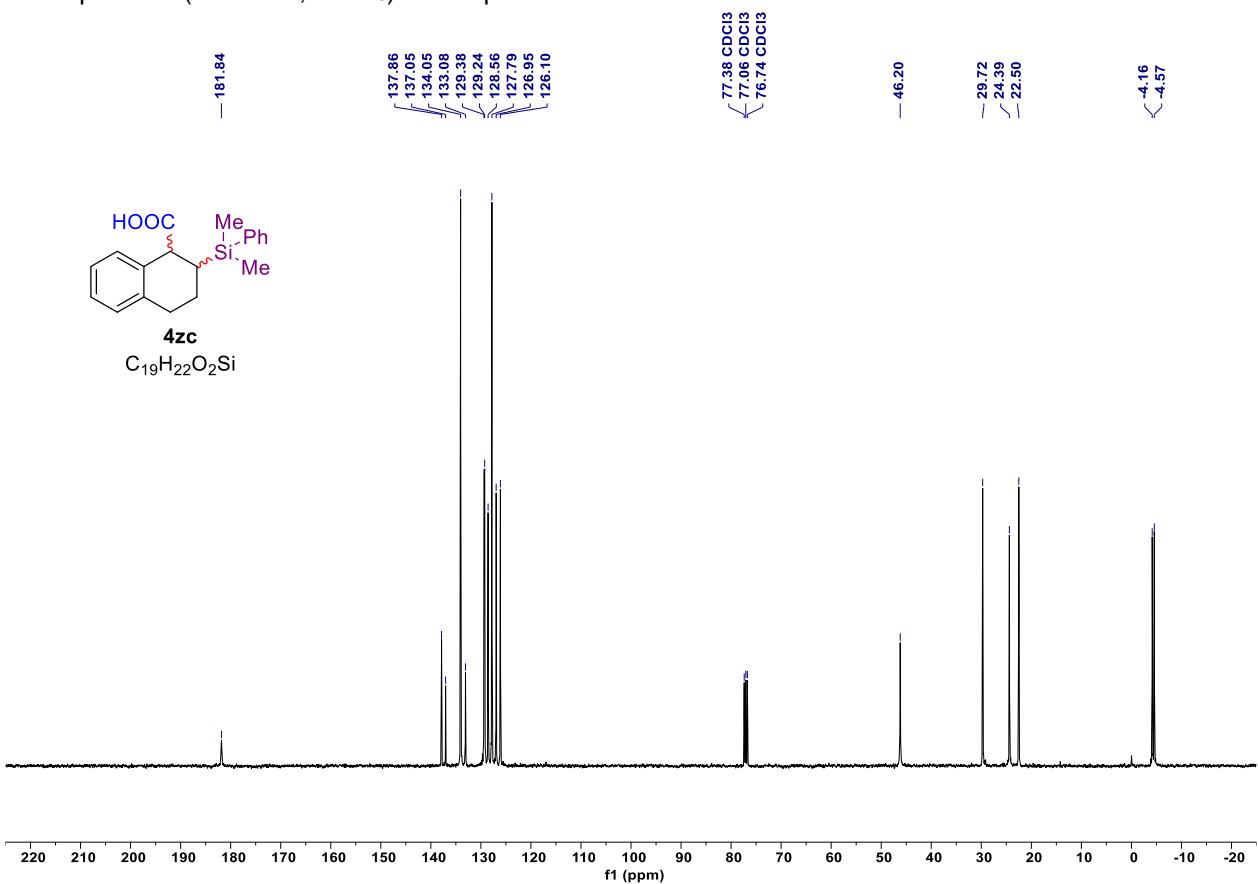

**$^{13}C\{^1H\}$  NMR spectrum (100 MHz,  $CDCl_3$ ) of compound 4zc. gao-23-4ch.**

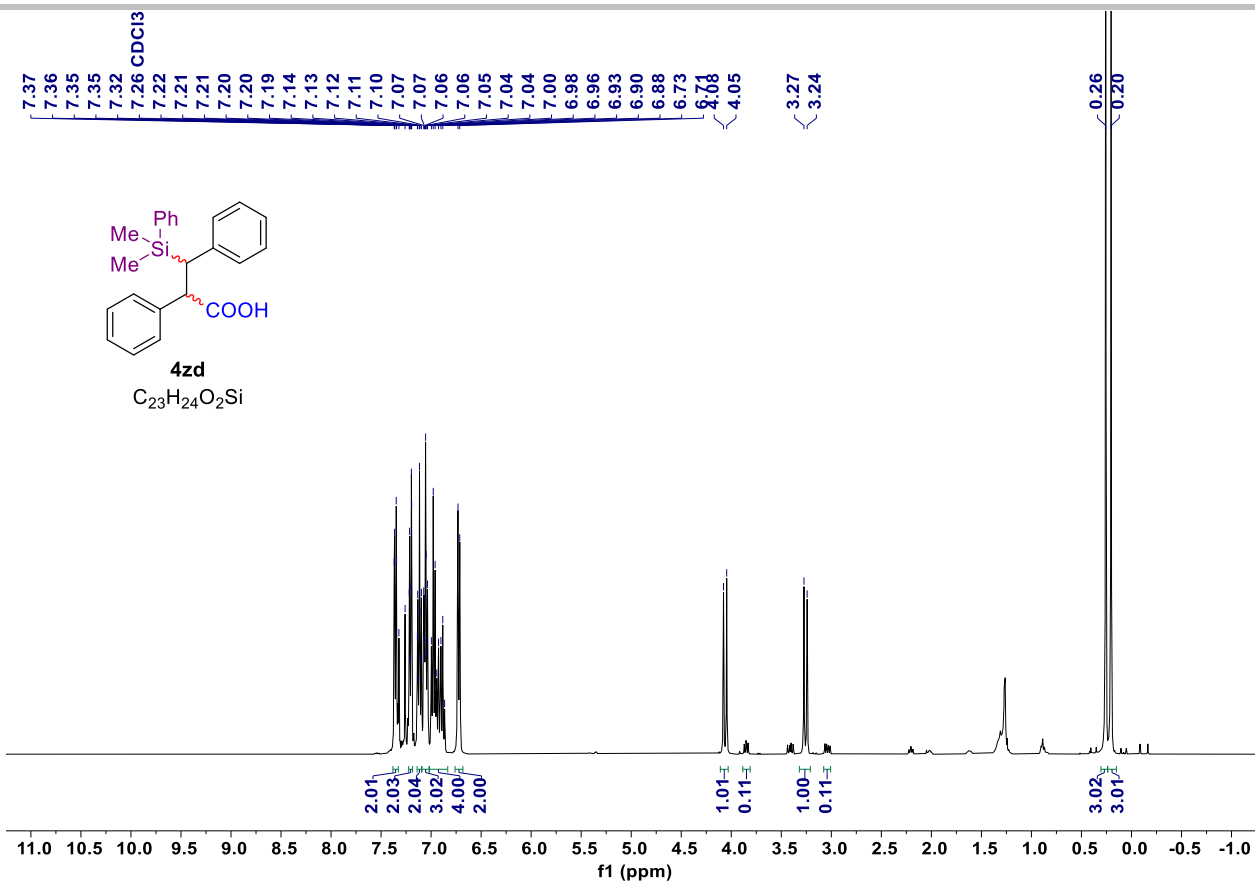

<sup>1</sup>H NMR spectrum (400 MHz, CDCl<sub>3</sub>) of compound **4zd**.

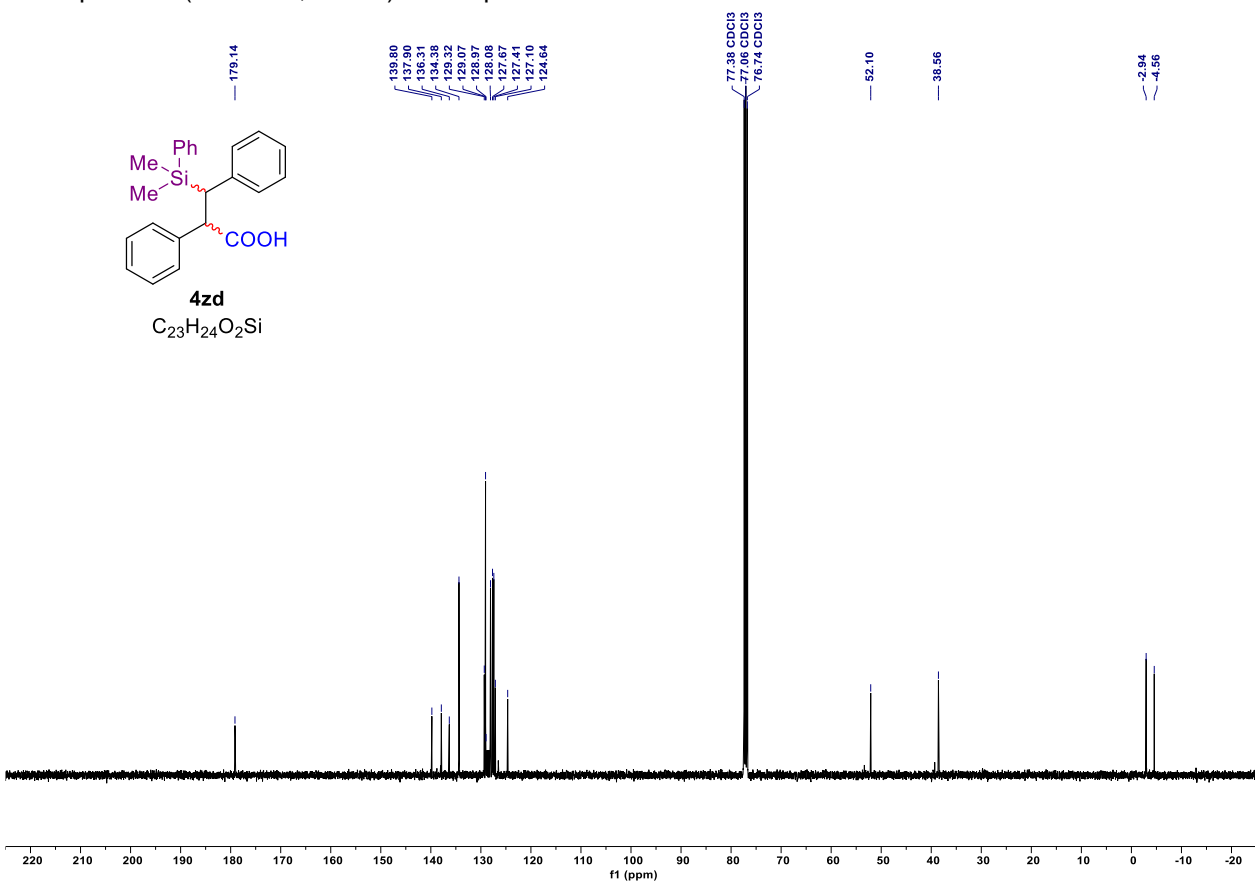

<sup>13</sup>C{<sup>1</sup>H} NMR spectrum (100 MHz, CDCl<sub>3</sub>) of compound **4zd**. gao-27-50chd

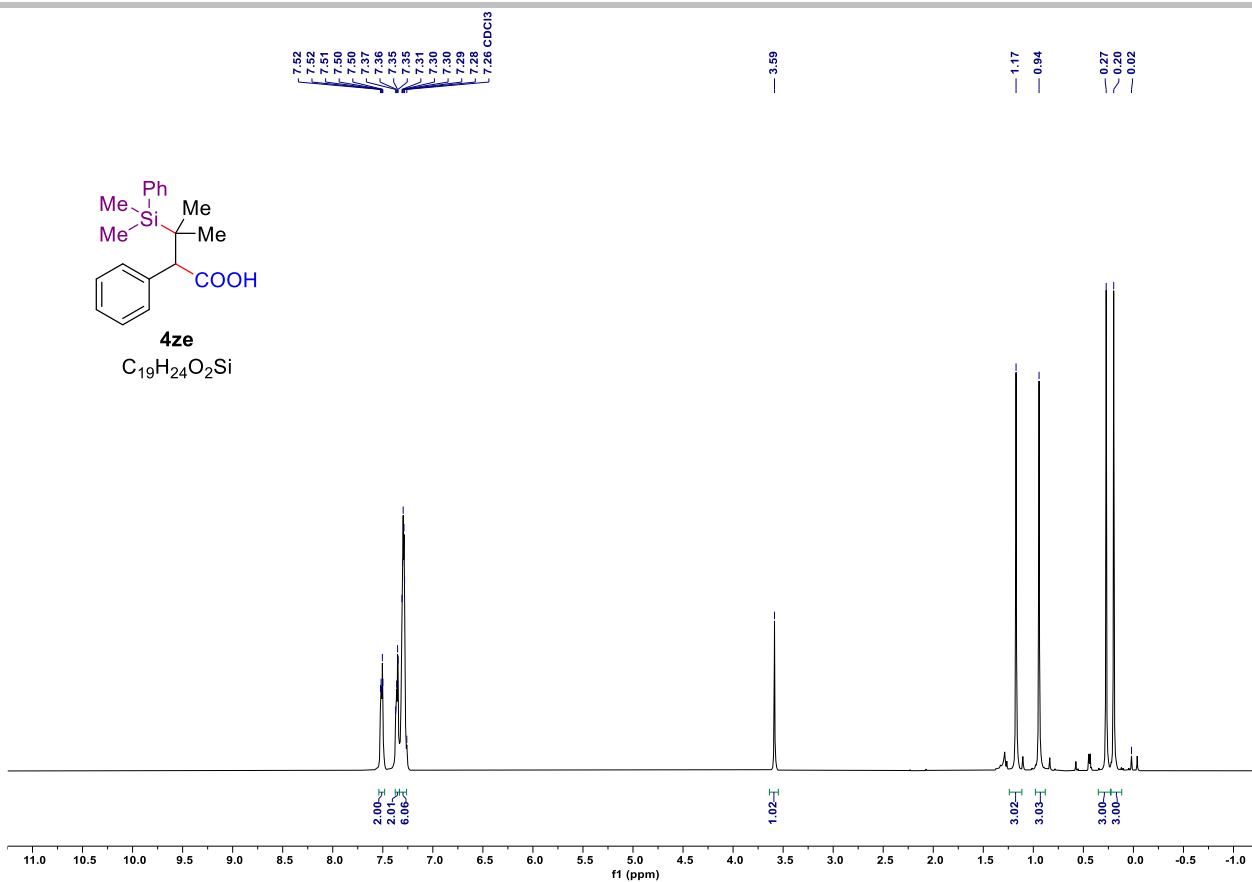

$^1H$  NMR spectrum (400 MHz,  $CDCl_3$ ) of compound **4ze**.

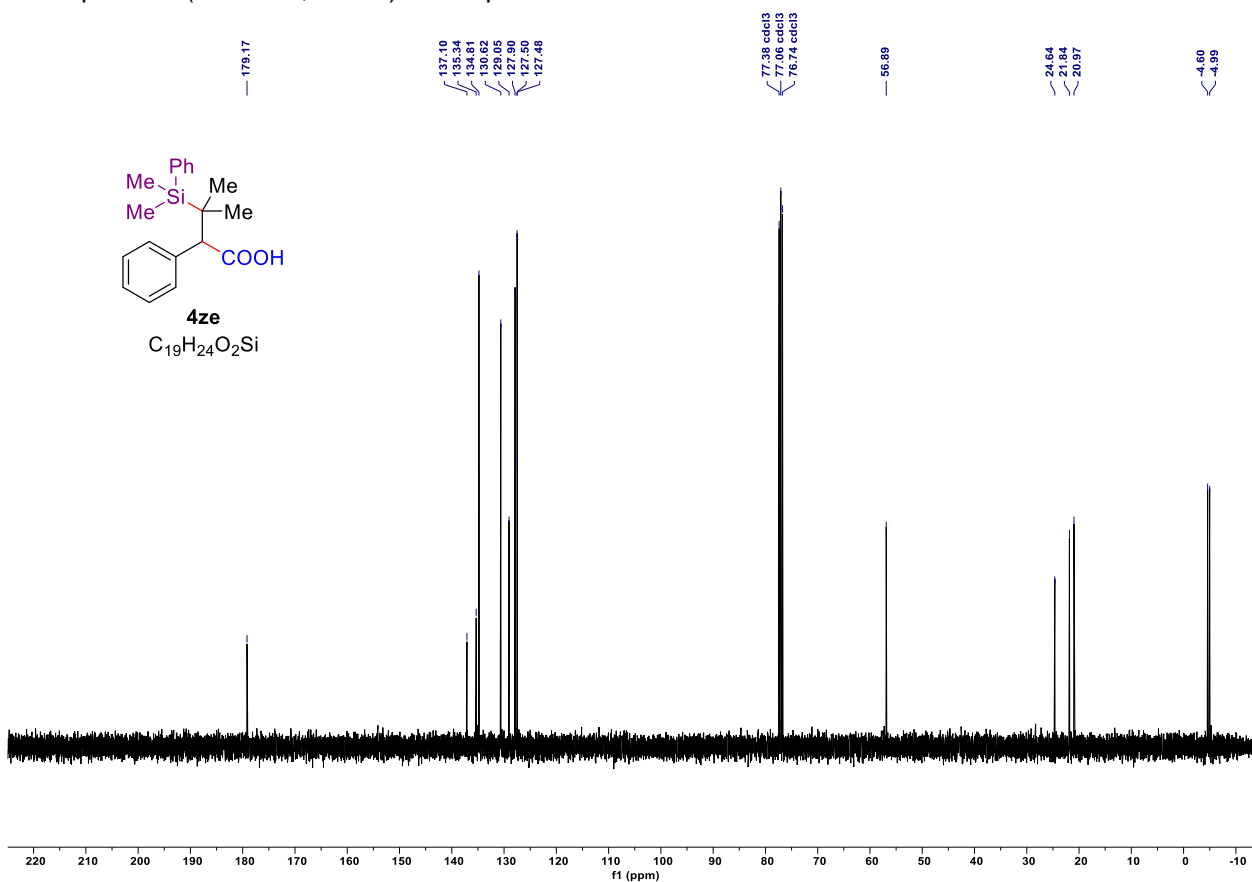

$^{13}C$  NMR spectrum (100 MHz,  $CDCl_3$ ) of compound **4ze**. gao-27-92chu.



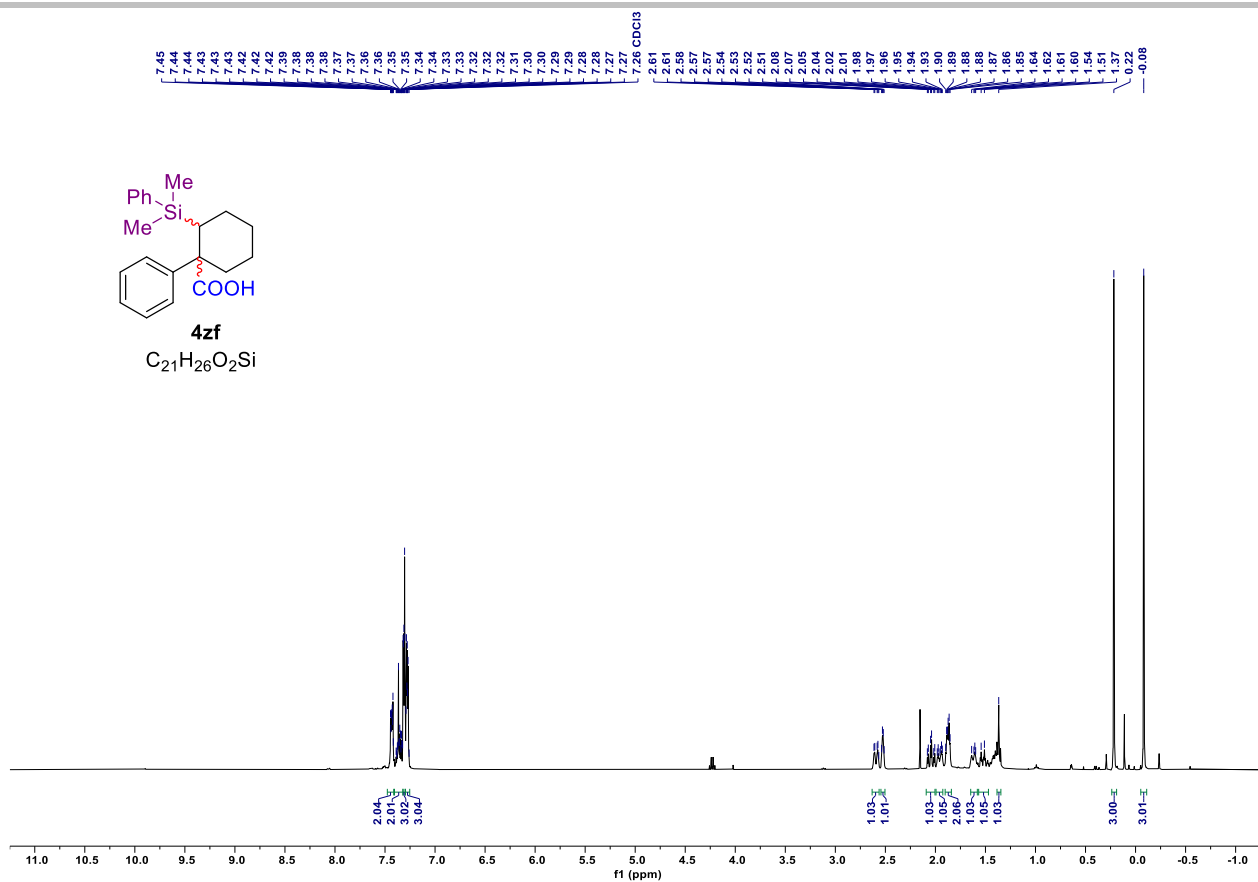

**1H NMR spectrum (400 MHz, CDCl<sub>3</sub>) of compound 4zf.**

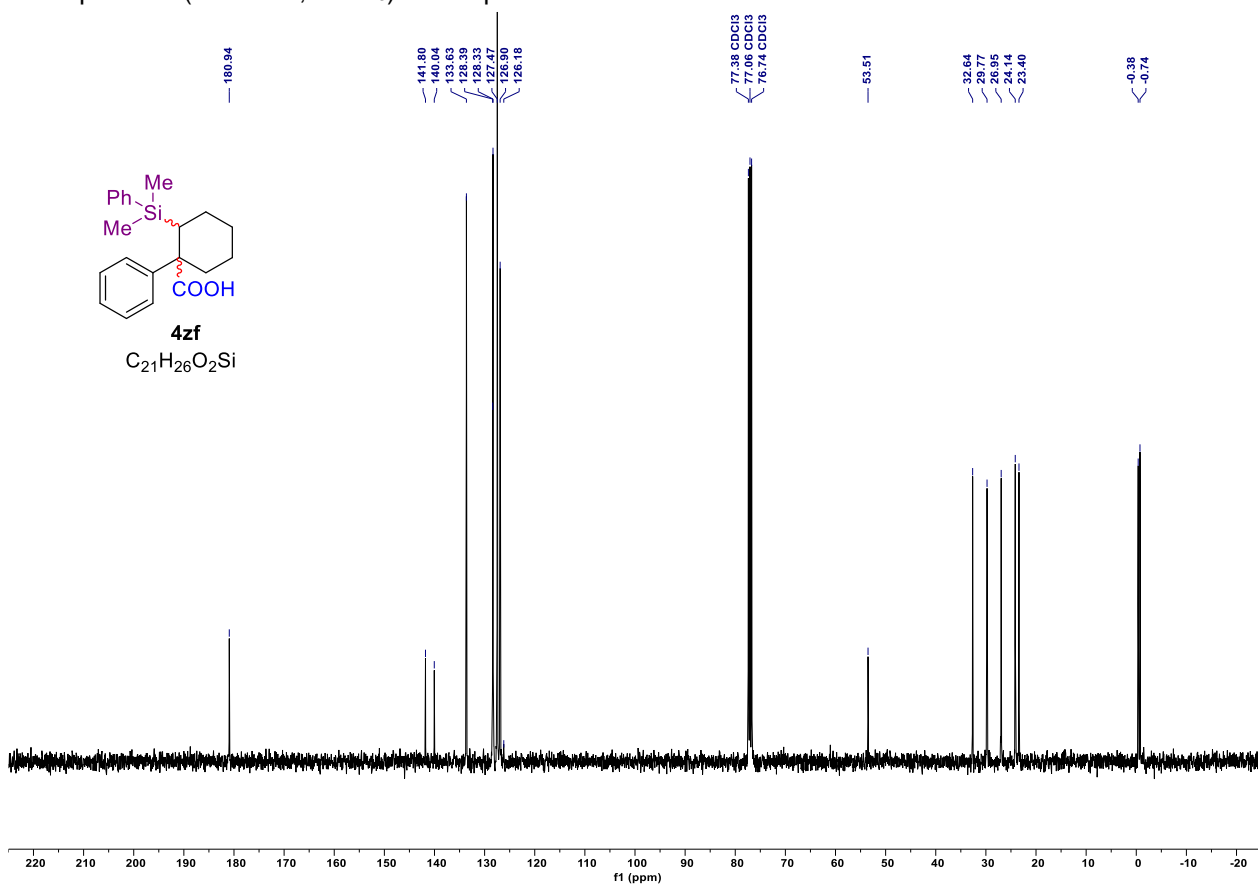

**13C NMR spectrum (100 MHz, CDCl<sub>3</sub>) of compound 4zf. gao-27-16ch**

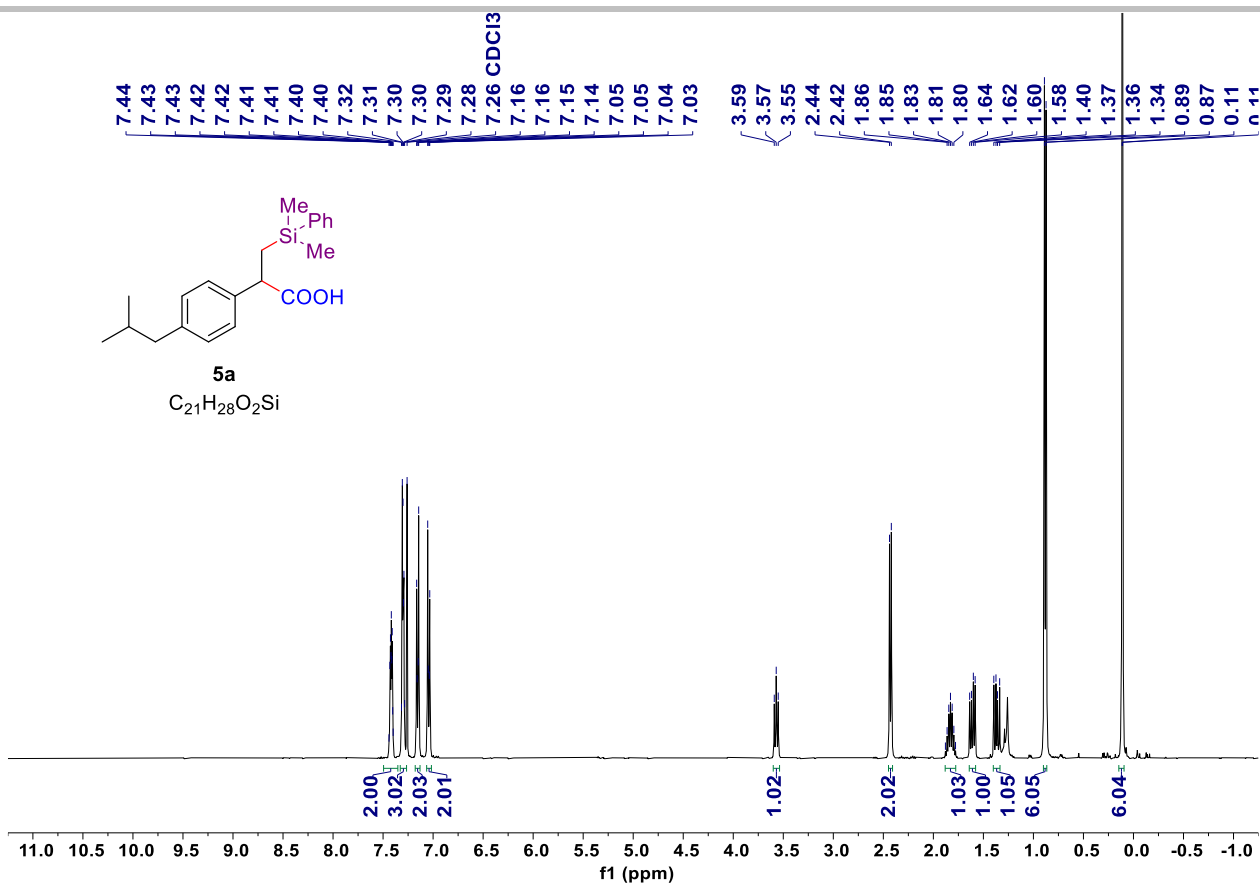

<sup>1</sup>H NMR spectrum (400 MHz, CDCl<sub>3</sub>) of compound **5a**.

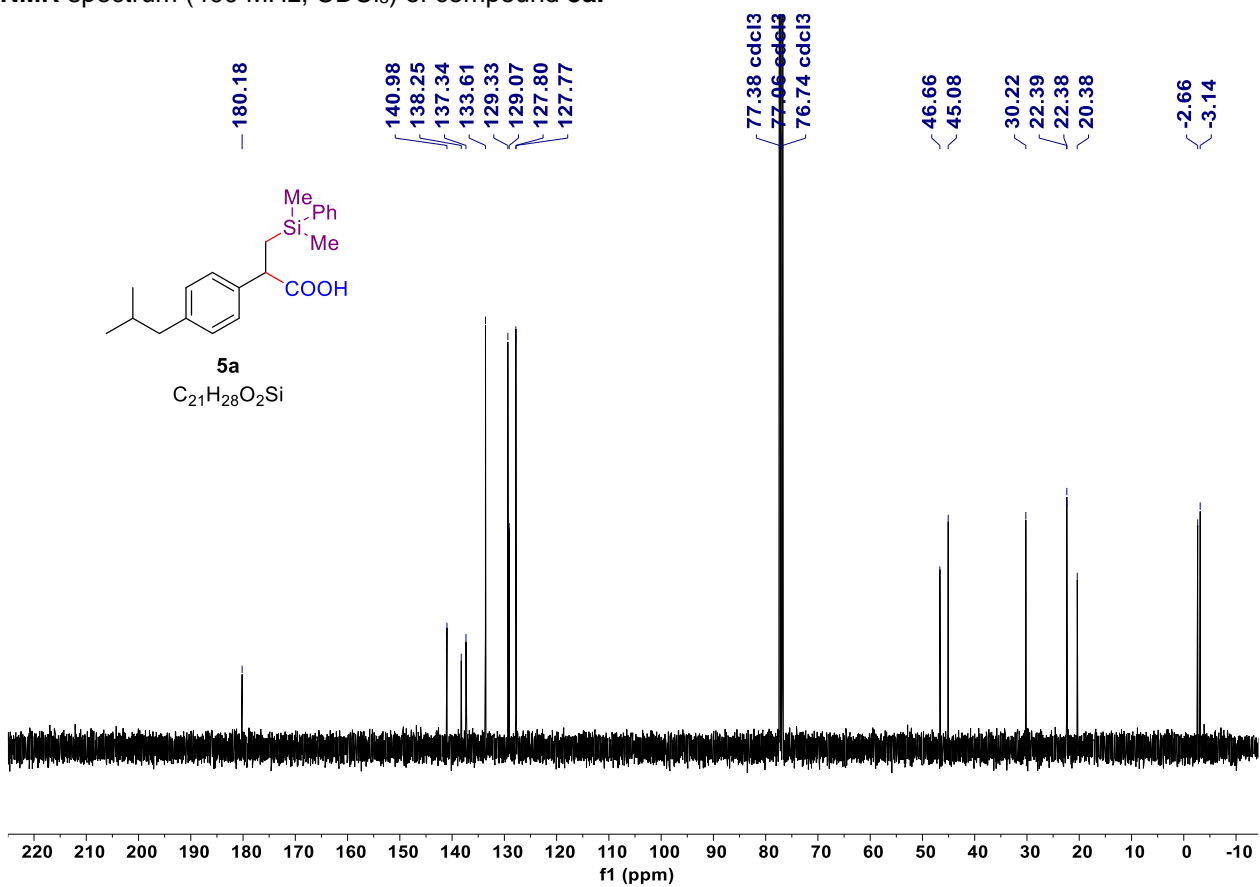

<sup>13</sup>C{<sup>1</sup>H} NMR spectrum (100 MHz, CDCl<sub>3</sub>) of compound **5a**. gao-9-2d-ch.

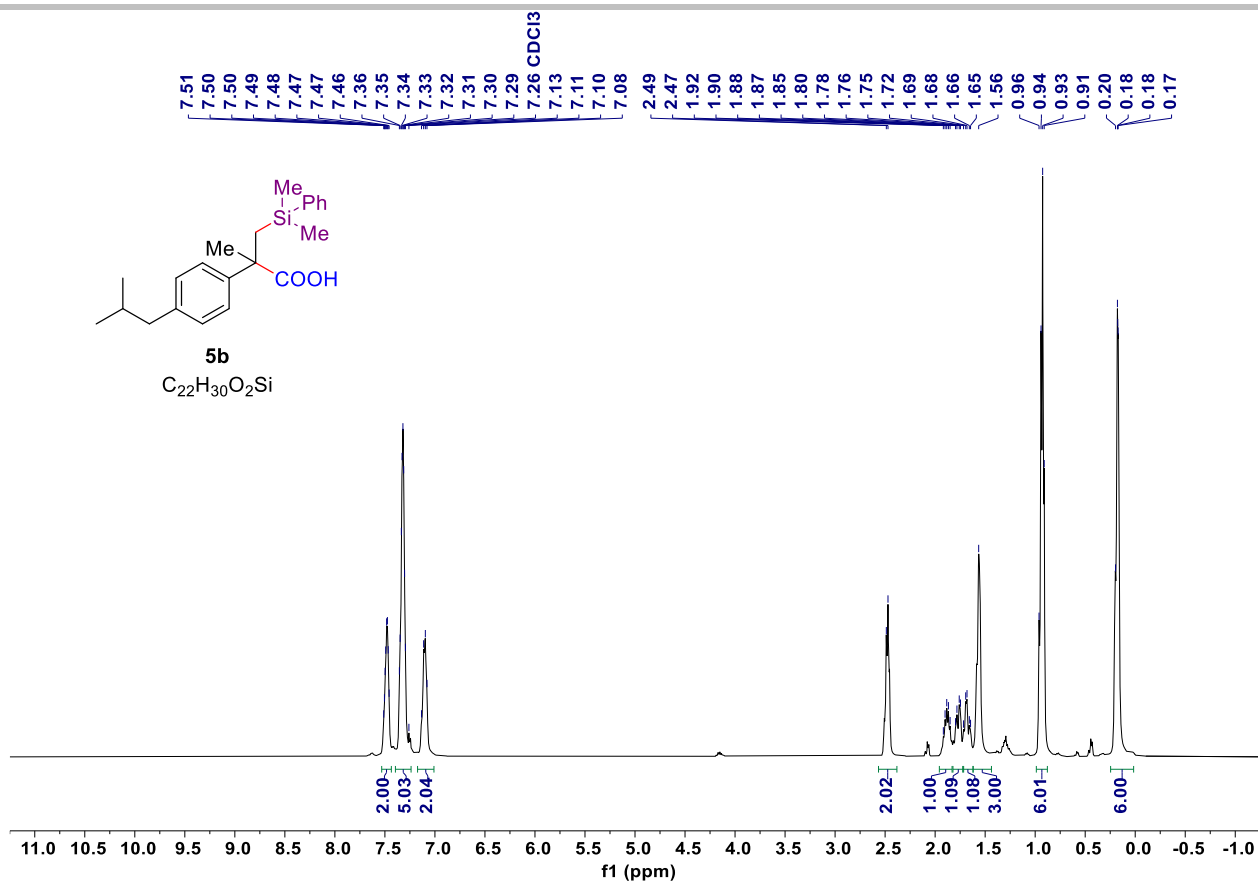

$^1H$  NMR spectrum (400 MHz,  $CDCl_3$ ) of compound **5b**.

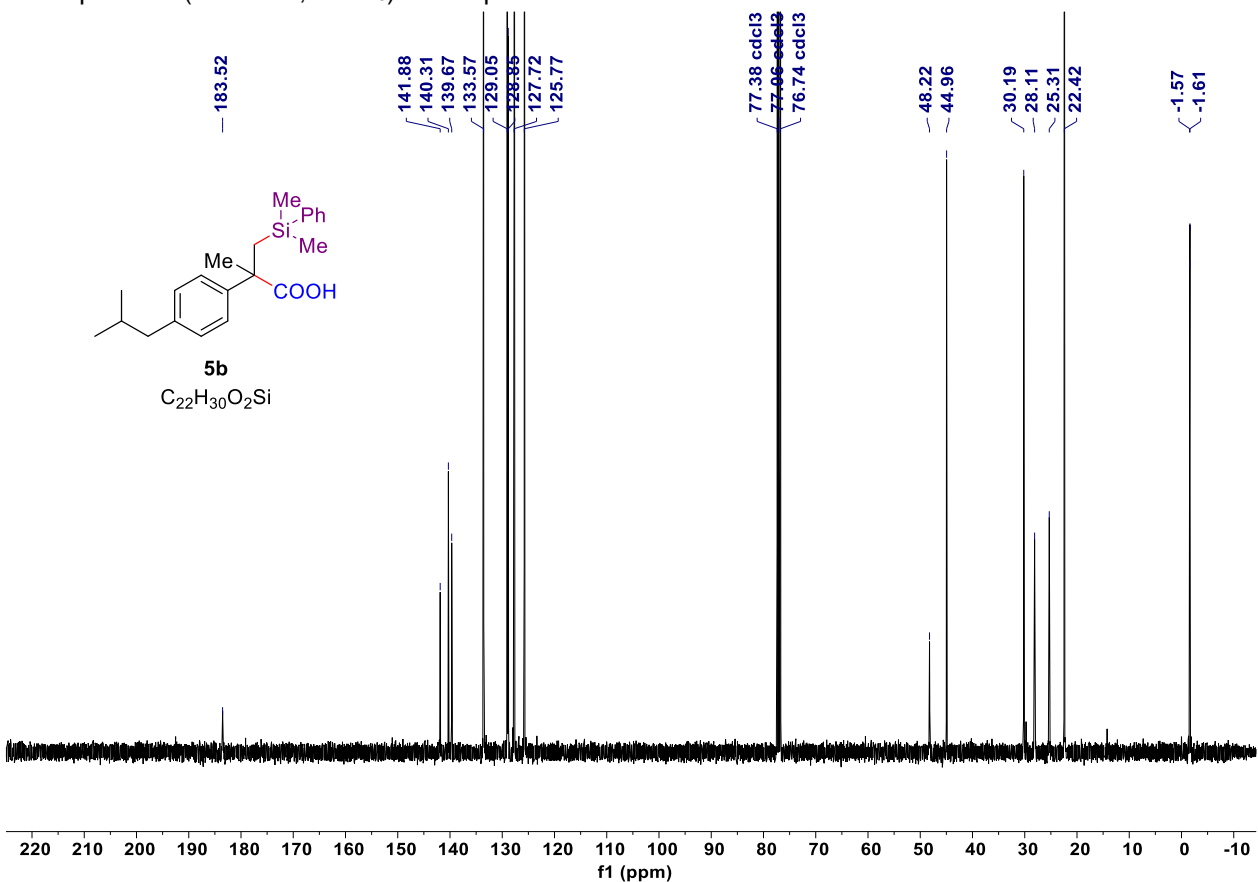

$^{13}C$  NMR spectrum (100 MHz,  $CDCl_3$ ) of compound **5b**. gao-9-2B-ch.

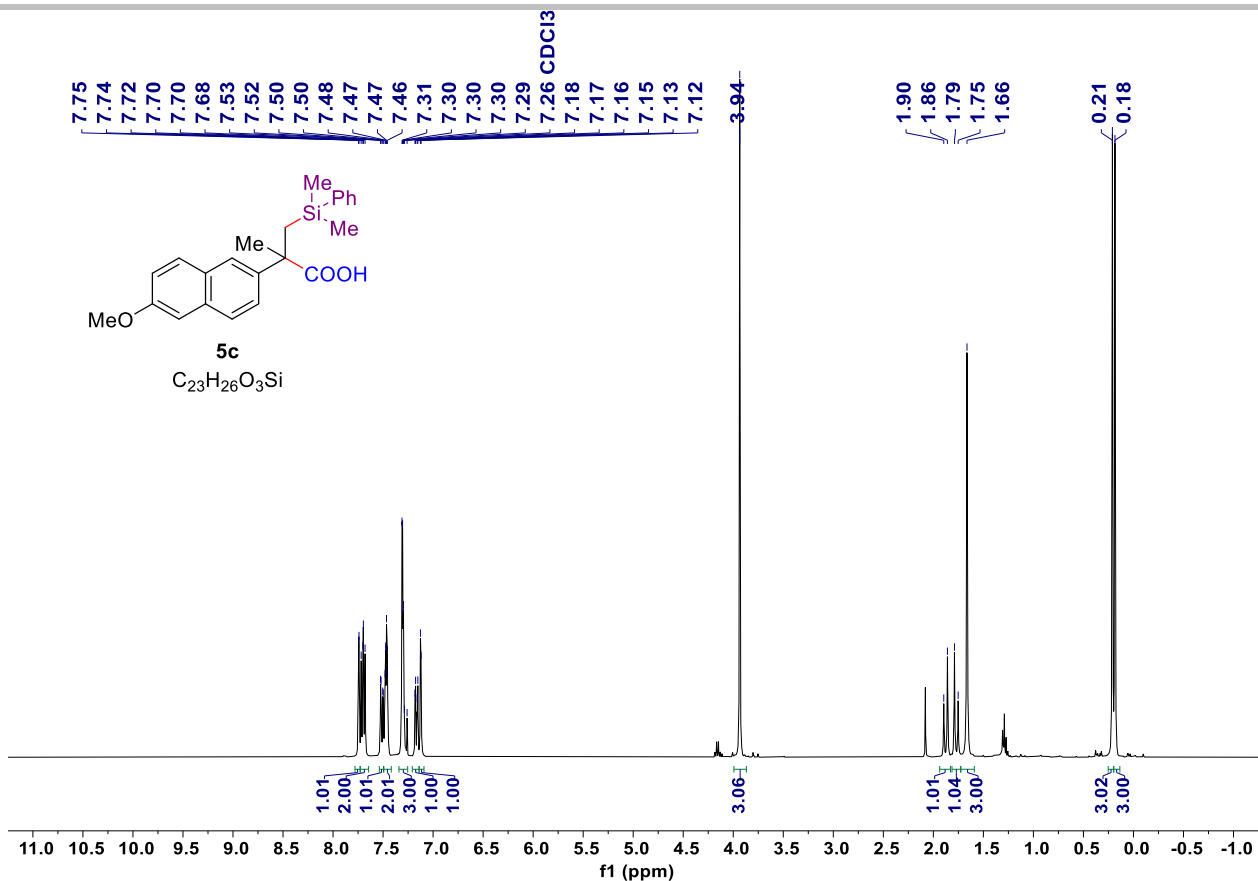

$^1H$  NMR spectrum (400 MHz,  $CDCl_3$ ) of compound **5c**.

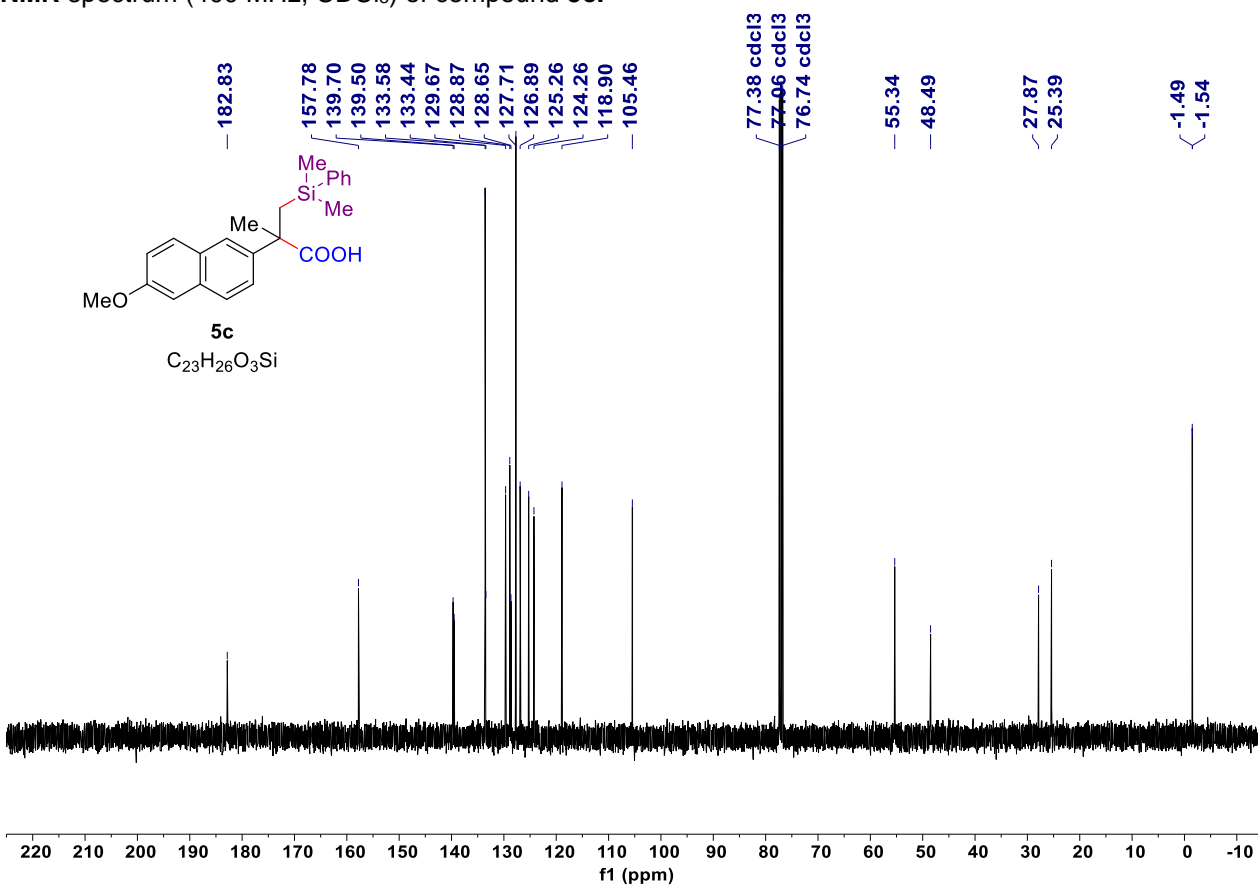

$^{13}C$  NMR spectrum (100 MHz,  $CDCl_3$ ) of compound **5c**. gao-27-97ch.

---

## 6. Energies and Cartesian Coordinates of the Optimized Structures

Geometry optimizations and characters of all the stationary points were calculated by using the M06-2X/6-31G(d,p) (using def2-TZVP for K atoms) method. Single point energies (Esol, a.u.) are computed by using the M06-2X/cc-pVTZ (using def2-QZVP for K atom) method in solvent (tetrahydrofuran). The solvent effect was treated with the PCM model.

### I—PhMe<sub>2</sub>SiBpin

M06-2X/6-31G(d,p) Electronic E: -1011.924854 a.u.

M06-2X/6-31G(d,p) Gibbs free E: -1011.623459 a.u.

M06-2X/cc-pVTZ Electronic E: -1012.217360 a.u.

|    |               |               |               |
|----|---------------|---------------|---------------|
| B  | -0.7127613735 | 0.0205657299  | 1.1472679182  |
| O  | -1.7942388726 | 0.4131044384  | 0.4018661771  |
| O  | -0.7130296168 | -1.3330943579 | 1.3964332419  |
| C  | -2.6854042195 | -0.7215100787 | 0.2961305100  |
| C  | -1.7209148070 | -1.9233892658 | 0.5428299099  |
| C  | -3.3461035315 | -0.7026258587 | -1.0724986491 |
| H  | -3.9575932479 | -1.5994487677 | -1.2150135127 |
| H  | -3.9964081387 | 0.1718226697  | -1.1519718721 |
| H  | -2.6041330306 | -0.6500401235 | -1.8703747643 |
| C  | -3.7320172549 | -0.5640099302 | 1.3972025465  |
| H  | -4.2236278968 | 0.4041523271  | 1.2779403755  |
| H  | -4.4898298755 | -1.3506004402 | 1.3451408132  |
| H  | -3.2635441838 | -0.5918542299 | 2.3850623219  |
| C  | -2.3460452124 | -3.1092928324 | 1.2584121631  |
| H  | -3.1714878934 | -3.5202768332 | 0.6682748171  |
| H  | -1.5962207768 | -3.8929668208 | 1.3907195729  |
| H  | -2.7221558210 | -2.8267901503 | 2.2425791248  |
| C  | -1.0038835145 | -2.3797796862 | -0.7265773652 |
| H  | -0.2096743043 | -3.0775687803 | -0.4497086013 |
| H  | -1.6873646803 | -2.8841971365 | -1.4150897344 |
| H  | -0.5456170768 | -1.5298694948 | -1.2411348904 |
| Si | 0.8105165493  | 1.2189250402  | 1.7119435883  |
| C  | 1.2849128408  | 0.8914439923  | 3.5094134632  |
| H  | 1.5113587462  | -0.1682586360 | 3.6574711799  |
| H  | 2.1716993308  | 1.4694151272  | 3.7854480367  |
| H  | 0.4742930351  | 1.1630738953  | 4.1920048243  |
| C  | 0.4144153849  | 3.0447881716  | 1.4686868701  |
| H  | 1.2521312682  | 3.6805591571  | 1.7717258182  |

---

|   |               |               |               |
|---|---------------|---------------|---------------|
| H | 0.1816642910  | 3.2595593326  | 0.4220546385  |
| H | -0.4537038177 | 3.3312510922  | 2.0690536712  |
| C | 2.2531977901  | 0.7280623462  | 0.5946784538  |
| C | 3.1112660781  | 1.6730131114  | 0.0172093299  |
| C | 2.4931601370  | -0.6286531280 | 0.3248676772  |
| C | 4.1761559260  | 1.2818975725  | -0.7917099420 |
| H | 2.9463026067  | 2.7329964197  | 0.1968937239  |
| C | 3.5569852248  | -1.0261078853 | -0.4803477689 |
| H | 1.8308956271  | -1.3824049504 | 0.7477701778  |
| C | 4.4010943786  | -0.0694454481 | -1.0400755239 |
| H | 4.8290190988  | 2.0307686701  | -1.2297591658 |
| H | 3.7262659820  | -2.0807310755 | -0.6758519613 |
| H | 5.2296848509  | -0.3763461834 | -1.6708191935 |

### **<sup>t</sup>BuOK**

M06-2X/6-31G(d,p) Electronic E: -832.902319 a.u.

M06-2X/6-31G(d,p) Gibbs free E: -832.810525 a.u.

M06-2X/cc-pVTZ Electronic E: -833.034178 a.u.

|   |               |               |              |
|---|---------------|---------------|--------------|
| C | 0.1163704779  | 0.9514402943  | 3.1178919267 |
| O | 0.1464595237  | 0.0955884766  | 2.0458121775 |
| C | -0.6461270245 | 2.2402065154  | 2.7547489902 |
| H | -1.6684266072 | 1.9856823403  | 2.4553151772 |
| H | -0.6941268259 | 2.9543814798  | 3.5856020993 |
| H | -0.1542106019 | 2.7268323326  | 1.9057316880 |
| C | -0.5881142234 | 0.2842474907  | 4.3151796338 |
| H | -0.6337527408 | 0.9328746015  | 5.1982616475 |
| H | -1.6099920730 | 0.0123896598  | 4.0297949113 |
| H | -0.0547550934 | -0.6336142888 | 4.5849742643 |
| C | 1.5492294432  | 1.3305884105  | 3.5399617317 |
| H | 2.1021911243  | 0.4225053255  | 3.8032935842 |
| H | 2.0613073430  | 1.8088616619  | 2.6981334740 |
| H | 1.5742480810  | 2.0143671646  | 4.3969648030 |
| K | 0.2285891971  | -1.3078604645 | 0.3202428913 |

### **Int2—<sup>t</sup>BuOK-B-Si**

M06-2X/6-31G(d,p) Electronic E: -1844.900554 a.u.

M06-2X/6-31G(d,p) Gibbs free E: -1844.478668 a.u.

M06-2X/cc-pVTZ Electronic E: -1845.302959 a.u.

|   |               |               |               |
|---|---------------|---------------|---------------|
| B | -0.6575945042 | 0.0817110023  | -0.3697472715 |
| O | -2.0475565980 | 0.4692290337  | 0.0909770929  |
| O | -0.5986155078 | -1.3518285310 | -0.1670482270 |

---

|    |               |               |               |
|----|---------------|---------------|---------------|
| C  | -2.7213200321 | -0.7025601880 | 0.5413986142  |
| C  | -1.9256996051 | -1.8537813765 | -0.1577022577 |
| C  | -4.1904537689 | -0.6180549175 | 0.1405340602  |
| H  | -4.7189316142 | -1.5461156764 | 0.3833150241  |
| H  | -4.6770076823 | 0.1962023849  | 0.6880811122  |
| H  | -4.2965311195 | -0.4316671503 | -0.9310194213 |
| C  | -2.6092128232 | -0.7770096274 | 2.0642128421  |
| H  | -2.9752671107 | 0.1603499674  | 2.4942950374  |
| H  | -3.2003948114 | -1.6013048341 | 2.4749069526  |
| H  | -1.5664101624 | -0.9075698469 | 2.3604033744  |
| C  | -1.9403928262 | -3.1752448048 | 0.6018640369  |
| H  | -2.9636646303 | -3.5419257193 | 0.7389263717  |
| H  | -1.3822093228 | -3.9244640581 | 0.0339507377  |
| H  | -1.4664143458 | -3.0697981338 | 1.5789998208  |
| C  | -2.4033025852 | -2.0922360686 | -1.5964204183 |
| H  | -1.6914706346 | -2.7591832918 | -2.0917460161 |
| H  | -3.3907126163 | -2.5649975651 | -1.6237065121 |
| H  | -2.4324502224 | -1.1528101942 | -2.1530947461 |
| Si | 0.6979437793  | 1.1169059345  | 0.8219925030  |
| C  | 0.3929641331  | 0.9242883938  | 2.6878848058  |
| H  | 0.5448977271  | -0.1124975639 | 3.0041224400  |
| H  | 1.0928322812  | 1.5488027482  | 3.2525816955  |
| H  | -0.6266391811 | 1.2124965851  | 2.9613732941  |
| C  | 0.5479500516  | 3.0189815999  | 0.5561611950  |
| H  | 1.2896207145  | 3.5643264099  | 1.1487128804  |
| H  | 0.6830450268  | 3.3289505552  | -0.4886126636 |
| H  | -0.4309976236 | 3.3652919367  | 0.9191753571  |
| C  | 2.5339100093  | 0.6789547818  | 0.6095216356  |
| C  | 3.5440765061  | 1.6147828464  | 0.3523621551  |
| C  | 2.9162554481  | -0.6667766756 | 0.7426561780  |
| C  | 4.8794933359  | 1.2314282753  | 0.2334479314  |
| H  | 3.2883602677  | 2.6664848120  | 0.2372677631  |
| C  | 4.2472105610  | -1.0580437955 | 0.6295816862  |
| H  | 2.1500756828  | -1.4215292465 | 0.9173292293  |
| C  | 5.2337375628  | -0.1069302166 | 0.3746566731  |
| H  | 5.6429439506  | 1.9771047923  | 0.0314195294  |
| H  | 4.5165153339  | -2.1048308009 | 0.7346854056  |
| H  | 6.2725560512  | -0.4090625128 | 0.2832168476  |
| C  | 0.3609676002  | 0.3245725469  | -2.7664947629 |
| O  | -0.6644503563 | 0.5350478197  | -1.8080840952 |
| K  | -2.0020882165 | 2.5717944701  | -1.2328790640 |

---

|   |               |               |               |
|---|---------------|---------------|---------------|
| C | -0.3497447346 | 0.2278337016  | -4.1192621673 |
| H | 0.3656873970  | 0.1003926574  | -4.9372571551 |
| H | -1.0380254554 | -0.6218419195 | -4.1178566188 |
| H | -0.9285543175 | 1.1398596054  | -4.3119091612 |
| C | 1.3128626076  | 1.5267007175  | -2.7776880934 |
| H | 0.7502026620  | 2.4555156758  | -2.9476864476 |
| H | 1.8533828640  | 1.6089590324  | -1.8309934367 |
| H | 2.0525492981  | 1.4359573844  | -3.5792552669 |
| C | 1.1523499634  | -0.9600054196 | -2.5172694196 |
| H | 0.4821953977  | -1.8206382540 | -2.4822776890 |
| H | 1.8827120652  | -1.1012910527 | -3.3205985934 |
| H | 1.6888231301  | -0.9148982297 | -1.5672137774 |

### TS2-3—<sup>t</sup>BuOK-B-Si-iso1-Scan-ts

M06-2X/6-31G(d,p) Electronic E: -1844.888550 a.u.

M06-2X/6-31G(d,p) Gibbs free E: -1844.467677 a.u.

M06-2X/cc-pVTZ Electronic E: -1845.283773 a.u.

|    |               |               |               |
|----|---------------|---------------|---------------|
| B  | -1.8182779437 | 0.1740027818  | -1.0366071488 |
| O  | -2.4470526715 | 1.3852716001  | -1.3856863209 |
| O  | -2.6011413480 | -0.5838346794 | -0.1859660134 |
| C  | -3.5863439412 | 1.5339853436  | -0.5169708682 |
| C  | -3.8925836716 | 0.0462049589  | -0.1218170042 |
| C  | -4.7009764200 | 2.2152923911  | -1.2981021034 |
| H  | -5.6230805696 | 2.2375541094  | -0.7086305653 |
| H  | -4.4160181613 | 3.2485498396  | -1.5155936233 |
| H  | -4.8978135172 | 1.7049697652  | -2.2423416207 |
| C  | -3.1869159553 | 2.3943280816  | 0.6780903998  |
| H  | -2.7766696618 | 3.3404052229  | 0.3106955058  |
| H  | -4.0534380968 | 2.6149946731  | 1.3085965646  |
| H  | -2.4144252245 | 1.9055542483  | 1.2730344783  |
| C  | -4.4567285924 | -0.1293953204 | 1.2788564583  |
| H  | -5.4056563029 | 0.4067590010  | 1.3827655294  |
| H  | -4.6401353938 | -1.1903058322 | 1.4661705254  |
| H  | -3.7568863860 | 0.2351337410  | 2.0317263377  |
| C  | -4.7818513717 | -0.6606414727 | -1.1455727109 |
| H  | -4.8083977620 | -1.7273660018 | -0.9087798553 |
| H  | -5.8055998412 | -0.2762590602 | -1.1291177906 |
| H  | -4.3769011650 | -0.5445347040 | -2.1557014289 |
| Si | 0.3585071887  | 1.2498949325  | 0.8544279787  |
| C  | 1.4841573827  | -0.0088171641 | 1.7941098907  |
| H  | 2.1836696517  | -0.5240774616 | 1.1265199731  |



---

|   |               |               |               |
|---|---------------|---------------|---------------|
| H | 2.0814141338  | 0.4917365349  | 2.5642408649  |
| H | 0.8842268010  | -0.7838057990 | 2.2828764700  |
| C | 0.0048026120  | 2.5511990993  | 2.2393364678  |
| H | 0.9249720650  | 2.9342661698  | 2.6960355563  |
| H | -0.5782435375 | 3.4075752364  | 1.8812438092  |
| H | -0.5870145189 | 2.0853394179  | 3.0365006941  |
| C | 1.6391282531  | 2.1853319317  | -0.2428708853 |
| C | 1.5673166946  | 3.5811112348  | -0.4520360969 |
| C | 2.4669412169  | 1.4765032040  | -1.1437510243 |
| C | 2.2041572592  | 4.2112441176  | -1.5231624054 |
| H | 0.9762123988  | 4.1856693376  | 0.2338163847  |
| C | 3.1112235830  | 2.0923886166  | -2.2153465157 |
| H | 2.5820548362  | 0.4004015438  | -1.0148576178 |
| C | 2.9630979003  | 3.4672308876  | -2.4308921545 |
| H | 2.1183934659  | 5.2879874704  | -1.6470297638 |
| H | 3.7340552595  | 1.5044050958  | -2.8849060054 |
| H | 3.4632256958  | 3.9530573702  | -3.2624716608 |
| C | -0.4752896941 | -1.6682650810 | -2.0459242471 |
| O | -0.9066859829 | -0.2980357074 | -1.9658927053 |
| K | -0.1589380707 | 2.1621604162  | -2.4787610729 |
| C | 0.6070759010  | -1.6738985050 | -3.1208810193 |
| H | 1.0144882768  | -2.6794732664 | -3.2545608774 |
| H | 0.1952117427  | -1.3380830247 | -4.0781663246 |
| H | 1.4245803723  | -1.0047812557 | -2.8318550941 |
| C | 0.0957903797  | -2.1344142676 | -0.7105107683 |
| H | 0.9522858118  | -1.5192485211 | -0.4269943121 |
| H | -0.6538543117 | -2.0568046167 | 0.0807901983  |
| H | 0.4195727225  | -3.1766488809 | -0.7931550118 |
| C | -1.6580122573 | -2.5369913737 | -2.4722006431 |
| H | -2.0917807622 | -2.1531744692 | -3.4007861654 |
| H | -1.3284788905 | -3.5662274269 | -2.6420372994 |
| H | -2.4255065820 | -2.5378974832 | -1.6956153624 |

### Int3—<sup>t</sup>BuOK-B-Si-iso-modSiB-int1

M06-2X/6-31G(d,p) Electronic E: -1844.893370 a.u.

M06-2X/6-31G(d,p) Gibbs free E: -1844.475995 a.u.

M06-2X/cc-pVTZ Electronic E: -1845.289937 a.u.

|   |               |               |               |
|---|---------------|---------------|---------------|
| B | -1.8794677410 | -0.1877349522 | -1.1299788970 |
| O | -2.0992887144 | 1.1550436559  | -1.4020769483 |
| O | -2.8096968117 | -0.7273700695 | -0.2853918750 |
| C | -3.0761566208 | 1.6043371049  | -0.4284889796 |

---

|    |               |               |               |
|----|---------------|---------------|---------------|
| C  | -3.8367346596 | 0.2747264325  | -0.1016429055 |
| C  | -3.9372430927 | 2.6859604550  | -1.0574645140 |
| H  | -4.7493183054 | 2.9657096066  | -0.3792979233 |
| H  | -3.3304615297 | 3.5760543930  | -1.2429463133 |
| H  | -4.3662075088 | 2.3560025904  | -2.0048888973 |
| C  | -2.2996553572 | 2.1508255804  | 0.7653136406  |
| H  | -1.6479698315 | 2.9614090277  | 0.4234006362  |
| H  | -2.9720117014 | 2.5497586362  | 1.5299555044  |
| H  | -1.6562394372 | 1.3838446144  | 1.2086475166  |
| C  | -4.3587595854 | 0.1815412026  | 1.3216503368  |
| H  | -5.0681781698 | 0.9905387906  | 1.5218267514  |
| H  | -4.8770947536 | -0.7704810625 | 1.4590547132  |
| H  | -3.5434712539 | 0.2376609999  | 2.0438698023  |
| C  | -4.9429911402 | -0.0367666453 | -1.1064227782 |
| H  | -5.2850304918 | -1.0617048435 | -0.9454496569 |
| H  | -5.7943608272 | 0.6381824574  | -0.9856674685 |
| H  | -4.5730911294 | 0.0457280262  | -2.1327276362 |
| Si | 1.5968292193  | 1.3924429786  | 1.1645697901  |
| C  | 3.2625888399  | 0.7308575173  | 1.8808661136  |
| H  | 3.8615670879  | 0.2159780249  | 1.1219536479  |
| H  | 3.8776651603  | 1.5246851676  | 2.3200487411  |
| H  | 3.0570813335  | -0.0057009481 | 2.6652503853  |
| C  | 0.9256216926  | 2.4389299664  | 2.6447288654  |
| H  | 1.6632338743  | 3.1616276222  | 3.0131620459  |
| H  | 0.0105241928  | 2.9890578186  | 2.3966979474  |
| H  | 0.6708425545  | 1.7714921061  | 3.4756353562  |
| C  | 2.1948372521  | 2.7672487025  | -0.0529744138 |
| C  | 1.4185609883  | 3.9216452632  | -0.3004379815 |
| C  | 3.2136714281  | 2.5074134097  | -0.9978305620 |
| C  | 1.5822880996  | 4.7052691202  | -1.4433457415 |
| H  | 0.6456348155  | 4.1982229387  | 0.4156560137  |
| C  | 3.3924090501  | 3.2840450968  | -2.1417387402 |
| H  | 3.8649148813  | 1.6475910409  | -0.8435858702 |
| C  | 2.5558740293  | 4.3770728762  | -2.3905927769 |
| H  | 0.9551236786  | 5.5803258434  | -1.5951372067 |
| H  | 4.1876663874  | 3.0423605005  | -2.8425766708 |
| H  | 2.6880475453  | 4.9832395065  | -3.2809230091 |
| C  | -0.4088270757 | -2.1597302634 | -1.4494117646 |
| O  | -0.8259125700 | -0.7971754642 | -1.7271890833 |
| K  | 0.5085017121  | 1.5316291925  | -1.9936611447 |
| C  | 0.9512868623  | -2.2858293009 | -2.1248123555 |

---

|   |               |               |               |
|---|---------------|---------------|---------------|
| H | 1.3379149696  | -3.3023524700 | -2.0175371629 |
| H | 0.8714191265  | -2.0568027519 | -3.1923039958 |
| H | 1.6633972249  | -1.5979801707 | -1.6553718009 |
| C | -0.2743412844 | -2.3707602694 | 0.0556978176  |
| H | 0.3489824525  | -1.5784033651 | 0.4843304266  |
| H | -1.2509401917 | -2.3556576349 | 0.5435628088  |
| H | 0.1949162468  | -3.3405438154 | 0.2452296162  |
| C | -1.4320058529 | -3.1043991710 | -2.0702520869 |
| H | -1.5130399365 | -2.9273834603 | -3.1467106818 |
| H | -1.1310629771 | -4.1432238404 | -1.9096173710 |
| H | -2.4117471547 | -2.9528847676 | -1.6091872637 |

#### Int4'—'BuOBpin

M06-2X/6-31G(d,p) Electronic E: -644.138280 a.u.

M06-2X/6-31G(d,p) Gibbs free E: -643.867313 a.u.

M06-2X/cc-pVTZ Electronic E: -644.375645 a.u.

|   |               |               |               |
|---|---------------|---------------|---------------|
| B | 0.0160731023  | 3.1641124245  | -1.3051748019 |
| O | 0.6093882360  | 2.7976106775  | -2.5011278281 |
| O | -1.2812244529 | 2.7161284532  | -1.1985621167 |
| C | -0.2695757976 | 1.8327970677  | -3.1120380713 |
| C | -1.6536358185 | 2.2174612222  | -2.4940746655 |
| C | 0.2059089083  | 0.4502160548  | -2.6693842274 |
| H | -0.3749113872 | -0.3457269072 | -3.1432662775 |
| H | 1.2552106897  | 0.3318940647  | -2.9509360896 |
| H | 0.1261153577  | 0.3431257962  | -1.5834494124 |
| C | -0.1823161088 | 1.9688675173  | -4.6229456908 |
| H | 0.8155015688  | 1.6776793019  | -4.9605971484 |
| H | -0.9129294554 | 1.3147348096  | -5.1091995018 |
| H | -0.3635920585 | 2.9972053144  | -4.9388021079 |
| C | -2.3293894028 | 3.3638992289  | -3.2446209242 |
| H | -2.7079842250 | 3.0407979998  | -4.2182695891 |
| H | -3.1667279428 | 3.7284362906  | -2.6453825745 |
| H | -1.6305912439 | 4.1917731662  | -3.3969379608 |
| C | -2.6170571319 | 1.0547093717  | -2.3197114644 |
| H | -3.5535545468 | 1.4183466865  | -1.8899489285 |
| H | -2.8396025552 | 0.5908432275  | -3.2859858137 |
| H | -2.2059836794 | 0.2984210466  | -1.6495031679 |
| C | 1.9726164266  | 4.2881464980  | -0.3203551015 |
| O | 0.5948096738  | 3.8781082022  | -0.3163039102 |
| C | 2.2277597135  | 5.2244733403  | -1.5001375735 |
| H | 1.5372747300  | 6.0716556909  | -1.4572374696 |

---

|   |              |              |               |
|---|--------------|--------------|---------------|
| H | 3.2505003310 | 5.6102046080 | -1.4603772759 |
| H | 2.0878688416 | 4.6997127421 | -2.4475741969 |
| C | 2.1621874756 | 5.0266613132 | 1.0001227851  |
| H | 1.4841946636 | 5.8823857858 | 1.0515567325  |
| H | 1.9403832726 | 4.3603621406 | 1.8376486400  |
| H | 3.1908775105 | 5.3844298144 | 1.0956471130  |
| C | 2.8763136857 | 3.0575021243 | -0.3804637435 |
| H | 2.6409792754 | 2.3830823752 | 0.4480123125  |
| H | 2.7387592429 | 2.5242377738 | -1.3236771352 |
| H | 3.9253131011 | 3.3554007765 | -0.2962088143 |

#### Int4—K<sup>+</sup>[<sup>t</sup>Bu<sub>2</sub>O<sub>2</sub>pin]<sup>-</sup>

M06-2X/6-31G(d,p) Electronic E: -1477.104563 a.u.

M06-2X/6-31G(d,p) Gibbs free E: -1476.715338 a.u.

M06-2X/cc-pVTZ Electronic E: -1477.454668 a.u.

|   |               |               |               |
|---|---------------|---------------|---------------|
| B | -0.1538988672 | 3.6811063256  | -1.5510228844 |
| O | 0.5232486550  | 3.0977289699  | -2.7070499439 |
| O | -1.2833404841 | 2.7048970931  | -1.2795135703 |
| C | -0.1358278976 | 1.9263290673  | -3.1359407362 |
| C | -1.5639474630 | 2.0667193444  | -2.5148572645 |
| C | 0.6023354815  | 0.6991168728  | -2.5848890640 |
| H | 0.1620070090  | -0.2413984897 | -2.9310587224 |
| H | 1.6435697252  | 0.7326633700  | -2.9160866491 |
| H | 0.6027966932  | 0.7084013522  | -1.4883395345 |
| C | -0.1230362848 | 1.8724512333  | -4.6606729151 |
| H | 0.9062180182  | 1.7585726285  | -5.0120892463 |
| H | -0.7097202150 | 1.0262886642  | -5.0360118574 |
| H | -0.5215408851 | 2.7974446474  | -5.0794594557 |
| C | -2.4714961567 | 2.9689082226  | -3.3575470147 |
| H | -2.7882484367 | 2.4724286278  | -4.2800916494 |
| H | -3.3641209965 | 3.2102795730  | -2.7705805590 |
| H | -1.9575738031 | 3.9015796443  | -3.5986844753 |
| C | -2.2755593623 | 0.7460450308  | -2.2410272950 |
| H | -3.2670827416 | 0.9427409873  | -1.8204136280 |
| H | -2.4089032732 | 0.1691012832  | -3.1619652695 |
| H | -1.7135301184 | 0.1272569277  | -1.5338981542 |
| C | 2.0530311953  | 3.9322028482  | -0.2809210262 |
| O | 0.6554219461  | 3.6696969511  | -0.2891432312 |
| C | 2.4565881594  | 5.0111333606  | -1.2902622442 |
| H | 1.9649959314  | 5.9587362690  | -1.0675662350 |
| H | 3.5405755299  | 5.1610584842  | -1.2492779739 |

---

|   |               |              |               |
|---|---------------|--------------|---------------|
| H | 2.1765030794  | 4.7071175818 | -2.3004275978 |
| C | 2.3896699024  | 4.3925265483 | 1.1390839842  |
| H | 1.8315087407  | 5.2991126540 | 1.3896205280  |
| H | 2.1254222371  | 3.6122979552 | 1.8660686777  |
| H | 3.4583761112  | 4.5993294081 | 1.2474128043  |
| C | 2.8156966273  | 2.6407751681 | -0.5945575110 |
| H | 2.5082585645  | 1.8397670966 | 0.0918823552  |
| H | 2.5947644989  | 2.3301663841 | -1.6159868144 |
| H | 3.8956179183  | 2.7830915127 | -0.4843579233 |
| C | -1.3659782524 | 5.8747494914 | -1.0918462812 |
| O | -0.6122695250 | 5.0055668028 | -1.9037856766 |
| C | -2.3462606285 | 6.5859950540 | -2.0302421705 |
| H | -3.0386751720 | 5.8599659270 | -2.4664588718 |
| H | -2.9239719665 | 7.3536606220 | -1.5051438216 |
| H | -1.7884259888 | 7.0565068037 | -2.8441939258 |
| C | -2.1657013697 | 5.1722205667 | 0.0174885640  |
| H | -2.7780972333 | 5.9045327382 | 0.5532199484  |
| H | -2.8092854886 | 4.3956452459 | -0.4003138000 |
| H | -1.4722779363 | 4.7247012564 | 0.7402497665  |
| C | -0.4397275040 | 6.9085482542 | -0.4428575020 |
| H | 0.2484746555  | 6.4080800871 | 0.2443705928  |
| H | 0.1460841664  | 7.4156935148 | -1.2148015962 |
| H | -1.0092076315 | 7.6591349068 | 0.1157789369  |
| K | -0.7338271636 | 2.0996091312 | 1.0431009334  |

### 1a—styrene

M06-2X/6-31G(d,p) Electronic E: -309.505959 a.u.

M06-2X/6-31G(d,p) Gibbs free E: -309.402619 a.u.

M06-2X/cc-pVTZ Electronic E: -309.616905 a.u.

|   |               |               |               |
|---|---------------|---------------|---------------|
| C | -0.3234079035 | 0.1663991970  | 0.6833949312  |
| H | 0.1318371020  | 0.1308067083  | -0.2996875977 |
| C | -0.2591434771 | -0.8800550639 | 1.5068190829  |
| H | 0.2465913139  | -1.7820327130 | 1.1652489781  |
| C | -0.8306874072 | -0.9638605711 | 2.8631710483  |
| C | -1.2821097963 | 0.1630997952  | 3.5628476455  |
| C | -0.9262967852 | -2.2138051708 | 3.4847616866  |
| C | -1.8274851010 | 0.0374958759  | 4.8337390680  |
| H | -1.1906280098 | 1.1473766544  | 3.1143168612  |
| C | -1.4726018184 | -2.3423061592 | 4.7577781035  |
| H | -0.5717659864 | -3.0948956883 | 2.9564397748  |
| C | -1.9277399384 | -1.2160984655 | 5.4362753357  |

---

|   |               |               |              |
|---|---------------|---------------|--------------|
| H | -2.1694776837 | 0.9219187735  | 5.3618441744 |
| H | -1.5407070960 | -3.3219286943 | 5.2198882545 |
| H | -2.3514064200 | -1.3109814805 | 6.4307152979 |
| H | -0.8362049931 | 1.0852220022  | 0.9504323552 |

#### Int5—Si-K-ion

M06-2X/6-31G(d,p) Electronic E: -1200.719248 a.u.

M06-2X/6-31G(d,p) Gibbs free E: -1200.592954 a.u.

M06-2X/cc-pVTZ Electronic E: -1200.899095 a.u.

|    |               |               |               |
|----|---------------|---------------|---------------|
| Si | 2.4881224403  | -0.6641257656 | 0.8004877396  |
| C  | 3.6641511771  | -2.0095697861 | 1.5133136495  |
| H  | 3.1233919142  | -2.7850276442 | 2.0656187257  |
| H  | 4.2603973626  | -2.4959152040 | 0.7329195828  |
| H  | 4.3571320301  | -1.5476634358 | 2.2242443499  |
| C  | 3.6680572216  | 0.3942319444  | -0.2902349459 |
| H  | 4.3648055717  | 0.9418180030  | 0.3529303905  |
| H  | 4.2603002066  | -0.2196273868 | -0.9783937091 |
| H  | 3.1306180497  | 1.1464432308  | -0.8768875054 |
| C  | 1.4395609432  | -1.6357089451 | -0.4990938088 |
| C  | 0.8745743901  | -0.9738310774 | -1.6131651940 |
| C  | 0.8599850224  | -2.8840604990 | -0.1763555926 |
| C  | -0.2450217153 | -1.4617225138 | -2.2863207009 |
| H  | 1.3035285929  | -0.0249273138 | -1.9326474280 |
| C  | -0.2594514003 | -3.3846550943 | -0.8404398853 |
| H  | 1.2769805783  | -3.4582113406 | 0.6501357822  |
| C  | -0.8456965524 | -2.6586246816 | -1.8824622717 |
| H  | -0.6522991224 | -0.9116572289 | -3.1309682652 |
| H  | -0.6780382579 | -4.3448712416 | -0.5495009755 |
| H  | -1.7195674892 | -3.0410827282 | -2.3996620477 |
| K  | -0.7391046031 | -0.5509899314 | 0.9229007201  |

#### Int5'—SiB-Si-K-new

M06-2X/6-31G(d,p) Electronic E: -2212.713260 a.u.

M06-2X/6-31G(d,p) Gibbs free E: -2212.256014 a.u.

M06-2X/cc-pVTZ Electronic E: -2213.158858 a.u.

|   |               |               |               |
|---|---------------|---------------|---------------|
| B | -1.0962939907 | -0.0476055343 | -0.1513820634 |
| O | -1.6180116597 | 0.9762736852  | -1.1388633359 |
| O | -2.2467586041 | -0.3115664536 | 0.7218624683  |
| C | -2.8694306961 | 1.4595842243  | -0.6679643448 |
| C | -3.4152649823 | 0.2483445254  | 0.1566307645  |
| C | -3.7228845563 | 1.8496775399  | -1.8710724590 |

---

|    |               |               |               |
|----|---------------|---------------|---------------|
| H  | -4.7416395621 | 2.1121846980  | -1.5673169427 |
| H  | -3.2906657020 | 2.7296200231  | -2.3638794534 |
| H  | -3.7726261655 | 1.0370723289  | -2.5993108818 |
| C  | -2.6390608744 | 2.6893292716  | 0.2113878429  |
| H  | -2.0380648547 | 3.4198438473  | -0.3428308562 |
| H  | -3.5805388504 | 3.1676431135  | 0.4987680273  |
| H  | -2.1000194799 | 2.4115047704  | 1.1178055061  |
| C  | -4.3640839989 | 0.6363717004  | 1.2860587155  |
| H  | -5.2359857995 | 1.1797245097  | 0.9050180252  |
| H  | -4.7173463948 | -0.2687992599 | 1.7870917020  |
| H  | -3.8545753787 | 1.2544206027  | 2.0276500406  |
| C  | -4.1002605485 | -0.7788823353 | -0.7490605012 |
| H  | -4.2485042761 | -1.7028718575 | -0.1848696267 |
| H  | -5.0721361620 | -0.4258590720 | -1.1088653257 |
| H  | -3.4704930816 | -1.0067238080 | -1.6124664076 |
| Si | 0.4737342636  | 0.7301362091  | 0.9916164065  |
| C  | 1.6779546929  | -0.5066896739 | 1.7894913489  |
| H  | 2.2751464262  | -1.0706523184 | 1.0703771374  |
| H  | 2.3650691574  | 0.0123233050  | 2.4651910527  |
| H  | 1.1160200386  | -1.2363776042 | 2.3824832544  |
| C  | -0.0223008565 | 1.8622974120  | 2.4438189859  |
| H  | 0.7951257524  | 1.9396172719  | 3.1672527048  |
| H  | -0.2995899034 | 2.8777546604  | 2.1486487957  |
| H  | -0.8868308925 | 1.4251958808  | 2.9556452638  |
| C  | 1.5188802360  | 1.7962039882  | -0.2146301179 |
| C  | 1.2618401656  | 3.1653085379  | -0.4166167460 |
| C  | 2.4519675250  | 1.1984276685  | -1.0814736068 |
| C  | 1.8893738013  | 3.8953227842  | -1.4286711991 |
| H  | 0.5544537310  | 3.6751312923  | 0.2332524639  |
| C  | 3.0820470277  | 1.9128993318  | -2.1027849570 |
| H  | 2.6919858885  | 0.1442239426  | -0.9578202610 |
| C  | 2.7985158638  | 3.2679931820  | -2.2848549986 |
| H  | 1.6801443690  | 4.9553629602  | -1.5434204372 |
| H  | 3.7988996799  | 1.4160902173  | -2.7507168297 |
| H  | 3.2965008617  | 3.8330774328  | -3.0667055239 |
| K  | -0.0061307872 | 1.8046477261  | -2.9035232354 |
| Si | -0.4942719490 | -1.7441360861 | -1.2723946934 |
| C  | -1.7734996214 | -3.1550968116 | -1.3324828058 |
| H  | -2.5782870945 | -2.9711085465 | -2.0492175299 |
| H  | -1.2904746379 | -4.0975273330 | -1.6088468679 |
| H  | -2.2351674729 | -3.2794048462 | -0.3481841240 |

---

|   |               |               |               |
|---|---------------|---------------|---------------|
| C | 1.1292081939  | -2.6350752122 | -0.8249151387 |
| H | 1.0782869838  | -3.0287984844 | 0.1950612127  |
| H | 1.2904526625  | -3.4808093486 | -1.5023312604 |
| H | 2.0150567043  | -1.9949065590 | -0.8753613876 |
| C | -0.2272741810 | -1.1934510067 | -3.0928739930 |
| C | 1.0513018948  | -0.9953934482 | -3.6434813137 |
| C | -1.3214306920 | -0.7957299939 | -3.8857403642 |
| C | 1.2362741242  | -0.4045542671 | -4.8966322916 |
| H | 1.9282461236  | -1.3025612261 | -3.0779014079 |
| C | -1.1535588045 | -0.2082111632 | -5.1398444725 |
| H | -2.3314115777 | -0.9385762222 | -3.5071916625 |
| C | 0.1321471755  | 0.0022775493  | -5.6471464700 |
| H | 2.2396940107  | -0.2708119882 | -5.2911556057 |
| H | -2.0217824164 | 0.0799270858  | -5.7258903517 |
| H | 0.2690476410  | 0.4529083017  | -6.6253000272 |

#### TS5-6—Styrene-Si-K-ion-Scan-ts

M06-2X/6-31G(d,p) Electronic E: -1510.245317 a.u.

M06-2X/6-31G(d,p) Gibbs free E: -1509.993206 a.u.

M06-2X/cc-pVTZ Electronic E: -1510.516031 a.u.

|    |               |               |               |
|----|---------------|---------------|---------------|
| Si | 2.8190839371  | -0.6957895686 | 0.4567545940  |
| C  | 3.8656488685  | -1.9755070743 | 1.4281943058  |
| H  | 3.2315896533  | -2.7227804367 | 1.9178138836  |
| H  | 4.5595157435  | -2.5087961045 | 0.7702981230  |
| H  | 4.4547210752  | -1.4881877033 | 2.2126715898  |
| C  | 4.0473172510  | 0.0038503549  | -0.8453592782 |
| H  | 4.8673449408  | 0.5143883213  | -0.3302547749 |
| H  | 4.4863842266  | -0.7863223673 | -1.4665817424 |
| H  | 3.5829140171  | 0.7435409573  | -1.5053115319 |
| C  | 1.5893900038  | -1.7395760161 | -0.5552983899 |
| C  | 1.3062300887  | -1.4573812848 | -1.9120666945 |
| C  | 0.6769848816  | -2.5973045933 | 0.1028065730  |
| C  | 0.1595757318  | -1.9338309869 | -2.5462064313 |
| H  | 1.9970843989  | -0.8337694157 | -2.4765429762 |
| C  | -0.4736098610 | -3.0774260292 | -0.5222836237 |
| H  | 0.8628050839  | -2.8699965853 | 1.1395804520  |
| C  | -0.7563614632 | -2.7268265033 | -1.8457703546 |
| H  | -0.0198970724 | -1.6973218495 | -3.5917684349 |
| H  | -1.1540583365 | -3.7274683295 | 0.0211864514  |
| H  | -1.6504917919 | -3.0988491263 | -2.3352039347 |
| C  | -1.5296476795 | 2.8612418274  | 1.8586272902  |



---

|   |               |               |               |
|---|---------------|---------------|---------------|
| C | -0.5782246508 | 1.9388361171  | 2.2877624655  |
| C | -0.9340206927 | 0.5960497192  | 2.5669599910  |
| C | -2.2980944245 | 0.2511328900  | 2.4113191553  |
| C | -3.2403861048 | 1.1765826973  | 1.9808271180  |
| C | -2.8644871843 | 2.4920979268  | 1.6886216326  |
| H | -1.2218793144 | 3.8830797712  | 1.6559194686  |
| H | 0.4527498864  | 2.2564887846  | 2.4042261549  |
| H | -2.6031754726 | -0.7704939144 | 2.6262486688  |
| H | -4.2774868521 | 0.8726125979  | 1.8734903797  |
| H | -3.5997896561 | 3.2152225690  | 1.3537928526  |
| C | 0.0488089519  | -0.4304399020 | 2.8383795809  |
| H | -0.3373306449 | -1.4392876643 | 2.9683458333  |
| C | 1.4035957711  | -0.2318240511 | 2.8269200406  |
| H | 1.8359011529  | 0.7587944702  | 2.8717351974  |
| H | 2.0662972055  | -1.0352607901 | 3.1278032707  |
| K | -0.4997986677 | 0.1692142923  | -0.1604599053 |

#### Int6—Styrene-Si-K-ion-Int

M06-2X/6-31G(d,p) Electronic E: -1510.278684 a.u.

M06-2X/6-31G(d,p) Gibbs free E: -1510.026525 a.u.

M06-2X/cc-pVTZ Electronic E: -1510.563598 a.u.

|    |               |               |               |
|----|---------------|---------------|---------------|
| Si | -1.9235559222 | 2.1098169889  | 1.6852391651  |
| C  | -3.2973452517 | 1.6153990189  | 0.4963548868  |
| H  | -3.4405425860 | 0.5304041941  | 0.4717187062  |
| H  | -4.2510539952 | 2.0792254175  | 0.7655562534  |
| H  | -3.0362700259 | 1.9397846207  | -0.5151637448 |
| C  | -1.6857126256 | 3.9758786324  | 1.6337294330  |
| H  | -2.6445798931 | 4.4866166016  | 1.7644835138  |
| H  | -1.0128473366 | 4.3235357253  | 2.4235213377  |
| H  | -1.2567420147 | 4.2781545413  | 0.6735155890  |
| C  | -2.4105808287 | 1.6019778239  | 3.4405133384  |
| C  | -1.6072817489 | 1.9740744611  | 4.5295905580  |
| C  | -3.5451502188 | 0.8249825389  | 3.7101491694  |
| C  | -1.9196149519 | 1.5894268898  | 5.8299602579  |
| H  | -0.7186766159 | 2.5805837859  | 4.3598673112  |
| C  | -3.8672665916 | 0.4348463571  | 5.0088181138  |
| H  | -4.1939875304 | 0.5194363288  | 2.8924621170  |
| C  | -3.0539421061 | 0.8168317587  | 6.0715827600  |
| H  | -1.2826649948 | 1.8925361898  | 6.6555859734  |
| H  | -4.7536857111 | -0.1652495508 | 5.1915403776  |
| H  | -3.3026767325 | 0.5158666724  | 7.0846327680  |

---

|   |               |              |               |
|---|---------------|--------------|---------------|
| C | 2.5658865276  | 4.3331537921 | -0.0047272411 |
| C | 1.5191648154  | 3.5120045642 | 0.3784220337  |
| C | 0.8172986322  | 2.6729217127 | -0.5842618223 |
| C | 1.1086309569  | 3.0104889359 | -1.9712009022 |
| C | 2.1575365169  | 3.8324863453 | -2.3183253699 |
| C | 2.9834797274  | 4.4478901856 | -1.3450686383 |
| H | 3.0764082683  | 4.9148466764 | 0.7606395219  |
| H | 1.2258522117  | 3.4772861567 | 1.4229454766  |
| H | 0.4986293867  | 2.5521938085 | -2.7463710410 |
| H | 2.3488555987  | 4.0205897886 | -3.3729482345 |
| H | 3.7692738426  | 5.1357258775 | -1.6313407615 |
| C | 0.0636553298  | 1.5680311951 | -0.2398585076 |
| H | -0.4576728225 | 1.0440216612 | -1.0396509384 |
| C | -0.3316245324 | 1.2159618495 | 1.1732002810  |
| H | -0.5135129539 | 0.1379692573 | 1.2696330468  |
| H | 0.4651679501  | 1.4528772987 | 1.8939748227  |
| K | 3.2461602263  | 1.5109118983 | -0.7565876109 |

#### Int6'—Styrene-Si-K-ion

M06-2X/6-31G(d,p) Electronic E: -1510.294284 a.u.

M06-2X/6-31G(d,p) Gibbs free E: -1510.039178 a.u.

M06-2X/cc-pVTZ Electronic E: -1510.567397 a.u.

|    |               |               |               |
|----|---------------|---------------|---------------|
| Si | 2.4469074204  | -0.8393525925 | 1.0512749207  |
| C  | 3.7856358761  | -2.1537994973 | 1.2668072212  |
| H  | 3.3670641482  | -3.0704100108 | 1.6944616182  |
| H  | 4.2613044310  | -2.4112824665 | 0.3161264724  |
| H  | 4.5642747764  | -1.7971674875 | 1.9489906226  |
| C  | 3.2279006439  | 0.6460847691  | 0.1880921840  |
| H  | 3.8872128477  | 1.1761963541  | 0.8826855297  |
| H  | 3.8365822505  | 0.3301943687  | -0.6653267911 |
| H  | 2.4818757819  | 1.3617056336  | -0.1687788892 |
| C  | 1.1521865079  | -1.5897175703 | -0.1143561680 |
| C  | 0.9615205540  | -1.1374028094 | -1.4287791669 |
| C  | 0.3604972371  | -2.6671957425 | 0.3238515923  |
| C  | 0.0246997505  | -1.7330590432 | -2.2795904726 |
| H  | 1.5565898731  | -0.3065277713 | -1.8006615885 |
| C  | -0.5766706520 | -3.2714447702 | -0.5173730331 |
| H  | 0.4752894477  | -3.0331984823 | 1.3410257818  |
| C  | -0.7469756251 | -2.8032578147 | -1.8228334942 |
| H  | -0.0915981825 | -1.3741911394 | -3.2978132006 |
| H  | -1.1663162973 | -4.1107188564 | -0.1606722731 |

---

|   |               |               |               |
|---|---------------|---------------|---------------|
| H | -1.4635849855 | -3.2806908498 | -2.4843241507 |
| C | -1.0396038909 | 2.4169420998  | 0.9059144907  |
| C | -0.1547777076 | 1.5695986583  | 1.5554952602  |
| C | -0.6155117469 | 0.5207144608  | 2.4531433639  |
| C | -2.0429328723 | 0.5750506644  | 2.7397891513  |
| C | -2.8932929118 | 1.4293534745  | 2.0746766750  |
| C | -2.4312581592 | 2.3294137361  | 1.0816107504  |
| H | -0.6356393065 | 3.1805840072  | 0.2433587974  |
| H | 0.9126433182  | 1.7144978141  | 1.4214363505  |
| H | -2.4345062102 | -0.0911063066 | 3.5053096825  |
| H | -3.9511048532 | 1.4188286072  | 2.3306123356  |
| H | -3.1044449298 | 3.0298951919  | 0.6030912752  |
| C | 0.2089210883  | -0.4634693487 | 2.9468297871  |
| H | -0.2028445056 | -1.1744029485 | 3.6581799529  |
| C | 1.7042863646  | -0.4486111391 | 2.7631132006  |
| H | 2.1387144124  | 0.5236104627  | 3.0572778304  |
| H | 2.1575053398  | -1.1787093917 | 3.4446980002  |
| K | -1.6860972331 | -0.3822802636 | 0.0295743812  |

## CO<sub>2</sub>

M06-2X/6-31G(d,p) Electronic E: -188.507408 a.u.

M06-2X/6-31G(d,p) Gibbs free E: -188.516816 a.u.

M06-2X/cc-pVTZ Electronic E: -188.593396 a.u.

|   |              |               |               |
|---|--------------|---------------|---------------|
| C | 1.6671591344 | -0.9283795404 | -0.7051757652 |
| O | 0.7447147627 | -1.3257927083 | -0.1191578010 |
| O | 2.5896035329 | -0.5309664113 | -1.2911937437 |

## TS6-7—Styrene-Si-K-ion-CO2-Scan-new-1-ts

M06-2X/6-31G(d,p) Electronic E: -1698.807210 a.u.

M06-2X/6-31G(d,p) Gibbs free E: -1698.543617 a.u.

M06-2X/cc-pVTZ Electronic E: -1699.168789 a.u.

|    |              |               |               |
|----|--------------|---------------|---------------|
| Si | 2.4553198933 | -0.7545395407 | 1.0730823891  |
| C  | 3.7688140655 | -2.0910211479 | 1.2922113599  |
| H  | 3.3489690802 | -2.9691859431 | 1.7927457718  |
| H  | 4.1844406417 | -2.4142938914 | 0.3333989167  |
| H  | 4.5916506238 | -1.7191427549 | 1.9110471473  |
| C  | 3.2187878435 | 0.6758571762  | 0.1061349097  |
| H  | 3.9023937889 | 1.2343066638  | 0.7532274829  |
| H  | 3.7983735435 | 0.3202353855  | -0.7519311146 |
| H  | 2.4632164251 | 1.3792181444  | -0.2571395558 |
| C  | 1.1120219458 | -1.5339081496 | -0.0288422803 |

---

|   |               |               |               |
|---|---------------|---------------|---------------|
| C | 1.0385221499  | -1.2681705011 | -1.4062515277 |
| C | 0.1991235201  | -2.4659496965 | 0.4986089582  |
| C | 0.1003210335  | -1.9017667228 | -2.2274749352 |
| H | 1.7327205249  | -0.5596339577 | -1.8525869160 |
| C | -0.7445833759 | -3.1021136483 | -0.3109272074 |
| H | 0.2219462109  | -2.6888991169 | 1.5620776811  |
| C | -0.7963296094 | -2.8208300870 | -1.6790283764 |
| H | 0.0803228818  | -1.6921804496 | -3.2929792272 |
| H | -1.4294901363 | -3.8258592719 | 0.1206218729  |
| H | -1.5153347696 | -3.3289090034 | -2.3144660197 |
| C | -1.0821756602 | 2.5470294800  | 0.9850881949  |
| C | -0.1683037235 | 1.6744342749  | 1.5675470374  |
| C | -0.5922477274 | 0.5727984496  | 2.3912132828  |
| C | -2.0197608215 | 0.4422675495  | 2.5527153035  |
| C | -2.9072347073 | 1.3224359115  | 1.9624974749  |
| C | -2.4653322443 | 2.3784495268  | 1.1365467025  |
| H | -0.7063156016 | 3.3850087685  | 0.4018783630  |
| H | 0.8936001832  | 1.8713368400  | 1.4578112146  |
| H | -2.3856043961 | -0.3380822751 | 3.2141875314  |
| H | -3.9716573101 | 1.1996182423  | 2.1492692350  |
| H | -3.1669242485 | 3.0843833598  | 0.7076785779  |
| C | 0.3061163856  | -0.2811931059 | 3.0465039924  |
| H | -0.1042880759 | -1.1810098769 | 3.4964082958  |
| C | 1.7869887992  | -0.2489501571 | 2.7789785374  |
| H | 2.1762441346  | 0.7579351176  | 2.9967472579  |
| H | 2.2922728342  | -0.8972852438 | 3.5055447474  |
| K | -1.6124856354 | -0.0866259996 | -0.3278654779 |
| C | 0.1086995590  | 0.8344052747  | 4.9928049152  |
| O | -0.9100200006 | 0.4124720527  | 5.4299723402  |
| O | 1.0902109754  | 1.4999033232  | 5.0029311442  |

### Int7—Styrene-Si-K-ion-CO2-Scan-P-new

M06-2X/6-31G(d,p) Electronic E: -1698.816038 a.u.

M06-2X/6-31G(d,p) Gibbs free E: -1698.549164 a.u.

M06-2X/cc-pVTZ Electronic E: -1699.202312 a.u.

|    |              |               |              |
|----|--------------|---------------|--------------|
| Si | 2.4469102467 | -0.7351266856 | 1.0548118609 |
| C  | 3.6839298452 | -2.1240932963 | 1.3508940525 |
| H  | 3.2226549228 | -2.9444101765 | 1.9096692079 |
| H  | 4.0767457542 | -2.5285044114 | 0.4136798312 |
| H  | 4.5261320268 | -1.7573433256 | 1.9457241291 |
| C  | 3.2811785859 | 0.6114619522  | 0.0295662414 |

---

|   |               |               |               |
|---|---------------|---------------|---------------|
| H | 4.0464818233  | 1.1041467215  | 0.6372103642  |
| H | 3.7795402826  | 0.1981879306  | -0.8531106056 |
| H | 2.5838188701  | 1.3862497448  | -0.3052426473 |
| C | 1.0979891000  | -1.5165875706 | -0.0537707149 |
| C | 0.9408437680  | -1.1455171102 | -1.4005544887 |
| C | 0.2986784348  | -2.5759825656 | 0.4164897354  |
| C | 0.0354389810  | -1.7984502642 | -2.2437364249 |
| H | 1.5508454678  | -0.3430883046 | -1.8085018524 |
| C | -0.6132208368 | -3.2320764244 | -0.4136932903 |
| H | 0.3995348702  | -2.9069415604 | 1.4475917499  |
| C | -0.7465499289 | -2.8448116299 | -1.7504367946 |
| H | -0.0433888662 | -1.5063362997 | -3.2869351969 |
| H | -1.2023858363 | -4.0577552113 | -0.0259351992 |
| H | -1.4341639125 | -3.3705526204 | -2.4058301268 |
| C | -1.1127627851 | 2.4959209627  | 0.7925716260  |
| C | -0.1947436311 | 1.6600589230  | 1.4391784822  |
| C | -0.6109476152 | 0.6799537525  | 2.3582623469  |
| C | -2.0008356761 | 0.5819691637  | 2.6147102755  |
| C | -2.9110860373 | 1.4225342785  | 1.9798316320  |
| C | -2.4787439781 | 2.3794049082  | 1.0497071398  |
| H | -0.7524120922 | 3.2545719850  | 0.1034263279  |
| H | 0.8641956922  | 1.7937735597  | 1.2424721402  |
| H | -2.3117631247 | -0.1171100417 | 3.3846425607  |
| H | -3.966859527  | 1.3488145698  | 2.2264872466  |
| H | -3.1892196052 | 3.0461135383  | 0.5713848343  |
| C | 0.3370042090  | -0.2006685094 | 3.1025196240  |
| H | -0.0209937156 | -1.2354370390 | 3.0292049087  |
| C | 1.8073750972  | -0.0923297801 | 2.7074630955  |
| H | 2.1264146945  | 0.9496717994  | 2.8373926716  |
| H | 2.3657121416  | -0.6152624303 | 3.4917019834  |
| K | -1.7746885429 | -0.3384944753 | -0.1983422770 |
| C | 0.1538249054  | 0.0927648029  | 4.7171330732  |
| O | -0.9960125530 | -0.1430316196 | 5.1179943075  |
| O | 1.1856179705  | 0.4701397593  | 5.2729021703  |

## THF

M06-2X/6-31G(d,p) Electronic E: -232.336851 a.u.

M06-2X/6-31G(d,p) Gibbs free E: -232.245353 a.u.

M06-2X/cc-pVTZ Electronic E: -232.425304 a.u.

|   |               |               |               |
|---|---------------|---------------|---------------|
| C | -0.2986478739 | -2.0349425240 | -3.4134042446 |
|---|---------------|---------------|---------------|

---

|   |               |               |               |
|---|---------------|---------------|---------------|
| O | 1.1158075460  | -2.0107092415 | -3.4134039620 |
| C | 1.6347799365  | -0.6947817318 | -3.4134040756 |
| C | 0.4551117373  | 0.2958342518  | -3.4134050774 |
| C | -0.8122749426 | -0.5826398887 | -3.4134049078 |
| H | -0.6437348218 | -2.5827131879 | -4.2984224644 |
| H | -0.6437352275 | -2.5827124967 | -2.5283857478 |
| H | 2.2688303952  | -0.5638003996 | -2.5283998308 |
| H | 2.2688314253  | -0.5638010120 | -4.2984076653 |
| H | 0.4874536314  | 0.9426851763  | -2.5346915113 |
| H | 0.4874541264  | 0.9426840614  | -4.2921194458 |
| H | -1.4293562863 | -0.3859259243 | -2.5347037558 |
| H | -1.4293560159 | -0.3859266131 | -4.2921064013 |

## II

M06-2X/6-31G(d,p) Electronic E: -2774.365962 a.u.

M06-2X/6-31G(d,p) Gibbs free E: -2773.497638 a.u.

M06-2X/cc-pVTZ Electronic E: -2775.081690 a.u.

|    |               |               |               |
|----|---------------|---------------|---------------|
| B  | -0.7398013196 | 0.5024509966  | 0.2415979981  |
| O  | -1.9821826435 | 0.8101807226  | 1.0314236382  |
| O  | -0.8616170252 | -0.9131780927 | -0.0972646126 |
| C  | -2.7751530152 | -0.3688459036 | 1.1190430148  |
| C  | -2.2318466022 | -1.2641677664 | -0.0467438246 |
| C  | -4.2497708241 | -0.0034844822 | 0.9825575854  |
| H  | -4.8790701506 | -0.9003244632 | 1.0027514103  |
| H  | -4.5500127271 | 0.6390267023  | 1.8170591159  |
| H  | -4.4405724490 | 0.5325315386  | 0.0516609945  |
| C  | -2.5483123510 | -1.0264613520 | 2.4834980440  |
| H  | -2.8041022589 | -0.3161904504 | 3.2762122016  |
| H  | -3.1734519512 | -1.9148678304 | 2.6156923854  |
| H  | -1.5003387658 | -1.3121554834 | 2.5970475268  |
| C  | -2.3371377712 | -2.7643911378 | 0.2102345437  |
| H  | -3.3772896122 | -3.0702558507 | 0.3694762401  |
| H  | -1.9505211465 | -3.3056920664 | -0.6576756858 |
| H  | -1.7438306233 | -3.0536679287 | 1.0793013051  |
| C  | -2.9047377033 | -0.9445869738 | -1.3898383395 |
| H  | -2.3762958967 | -1.4868148117 | -2.1791206378 |
| H  | -3.9540430793 | -1.2578902335 | -1.4053306897 |
| H  | -2.8391586157 | 0.1241021377  | -1.6104674447 |
| Si | 0.9692913355  | 0.7344646609  | 1.4291747679  |
| C  | 0.8906831592  | -0.2100071164 | 3.0847090398  |
| H  | 0.8063937659  | -1.2859140524 | 2.8985897719  |

---

|   |               |               |               |
|---|---------------|---------------|---------------|
| H | 1.8141164673  | -0.0458493837 | 3.6504177462  |
| H | 0.0471115050  | 0.0869796688  | 3.7144935380  |
| C | 1.3937970928  | 2.5361428557  | 1.9470692983  |
| H | 2.3209105758  | 2.5673141258  | 2.5305761590  |
| H | 1.5236304723  | 3.2111238151  | 1.0895162984  |
| H | 0.6038117706  | 2.9438772553  | 2.5922095320  |
| C | 2.5495983622  | 0.0156128618  | 0.6455956400  |
| C | 3.7652600909  | 0.7056323308  | 0.5518297887  |
| C | 2.5144111006  | -1.3019374721 | 0.1569751420  |
| C | 4.9002682989  | 0.1134049053  | -0.0013633003 |
| H | 3.8314011501  | 1.7303098427  | 0.9131578228  |
| C | 3.6437024998  | -1.9021088387 | -0.3933559568 |
| H | 1.5736202535  | -1.8504242064 | 0.1875879423  |
| C | 4.8421155353  | -1.1945634025 | -0.4729887017 |
| H | 5.8297196516  | 0.6724956372  | -0.0637454325 |
| H | 3.5895058540  | -2.9207148932 | -0.7666990661 |
| H | 5.7236683497  | -1.6595228131 | -0.9041712565 |
| C | -0.0165974516 | 1.5056482837  | -2.0552495428 |
| O | -0.8448411437 | 1.4446510374  | -0.9099886750 |
| K | -1.2993943345 | 3.5003226071  | 0.7085097111  |
| C | -0.8887424021 | 2.1612054726  | -3.1319145169 |
| H | -0.3197387244 | 2.3732568032  | -4.0433551919 |
| H | -1.7186932329 | 1.4935037101  | -3.3871151483 |
| H | -1.3081357490 | 3.0987919934  | -2.7454753240 |
| C | 1.2064939129  | 2.3907174540  | -1.7808055546 |
| H | 0.8783371689  | 3.3562347577  | -1.3814650670 |
| H | 1.8801861324  | 1.9161655658  | -1.0621722369 |
| H | 1.7751128590  | 2.5670821634  | -2.7010630012 |
| C | 0.4454286556  | 0.1315047734  | -2.5427057677 |
| H | -0.4118679986 | -0.5195647773 | -2.7230288097 |
| H | 1.0109619642  | 0.2459868219  | -3.4740650447 |
| H | 1.0865075068  | -0.3540581189 | -1.8045322478 |
| C | -0.3570252126 | 5.6871853606  | -2.2460662881 |
| O | -0.1238153427 | 5.3914810435  | -0.8766579498 |
| C | 1.1319362272  | 5.9892815737  | -0.5757755955 |
| C | 1.1374720920  | 7.3363610924  | -1.3271942735 |
| C | 0.0145085122  | 7.1671186883  | -2.3788833798 |
| H | 0.2887762316  | 5.0561291990  | -2.8759547190 |
| H | -1.3997022572 | 5.4507338410  | -2.4645585115 |
| H | 1.2012938959  | 6.0745559692  | 0.5100773785  |
| H | 1.9397461997  | 5.3356494244  | -0.9363737144 |

---

|   |               |              |               |
|---|---------------|--------------|---------------|
| H | 0.9208311327  | 8.1692155726 | -0.6531481972 |
| H | 2.1089137314  | 7.5277344562 | -1.7869739899 |
| H | -0.8462355049 | 7.7927816237 | -2.1268580273 |
| H | 0.3345775958  | 7.4258762294 | -3.3897146484 |
| C | -1.0546385221 | 7.1169595116 | 1.6868666222  |
| O | -0.6310641174 | 5.8019684165 | 2.0459926339  |
| C | 0.2759127089  | 5.8547511848 | 3.1541199263  |
| C | 0.2039233627  | 7.2874080409 | 3.6788930722  |
| C | -0.0938490493 | 8.0678597989 | 2.3961111045  |
| H | -1.0362983477 | 7.1927131193 | 0.5950096968  |
| H | -2.0862629593 | 7.2716931353 | 2.0338476137  |
| H | -0.0267393362 | 5.0918705352 | 3.8757742037  |
| H | 1.2864175035  | 5.6111129905 | 2.7975608964  |
| H | -0.6261242057 | 7.3959305794 | 4.3854770590  |
| H | 1.1228663894  | 7.5986570629 | 4.1789064147  |
| H | -0.5252137139 | 9.0554160980 | 2.5704440929  |
| H | 0.8237008811  | 8.1901678959 | 1.8087916426  |
| C | -1.8530609225 | 2.2644258015 | 4.0057518533  |
| O | -1.7491418185 | 3.5338757131 | 3.3510798312  |
| C | -2.7707245363 | 4.4192904468 | 3.8102545126  |
| C | -3.5245327128 | 3.6670951750 | 4.9112877793  |
| C | -3.2861966021 | 2.2061619602 | 4.5179891305  |
| H | -1.6182299319 | 1.4977444357 | 3.2637395180  |
| H | -1.1301003323 | 2.2195023511 | 4.8329235692  |
| H | -2.3097314705 | 5.3502526402 | 4.1613447252  |
| H | -3.4280655038 | 4.6647413069 | 2.9651552798  |
| H | -3.0732630388 | 3.8700493982 | 5.8876373525  |
| H | -4.5797087227 | 3.9429836213 | 4.9586756002  |
| H | -3.4169398033 | 1.5043320335 | 5.3440199289  |
| H | -3.9568114416 | 1.9135606136 | 3.7026593047  |
| C | -3.8439670067 | 2.9895842749 | -1.1798450776 |
| O | -3.2537782431 | 4.2740132358 | -0.9303874403 |
| C | -3.9801262089 | 5.2107916026 | -1.7077934073 |
| C | -4.1669977528 | 4.5063072918 | -3.0490027705 |
| C | -4.4066909046 | 3.0456320732 | -2.6173166229 |
| H | -3.0617028692 | 2.2360246249 | -1.0374103090 |
| H | -4.6462058975 | 2.8217924631 | -0.4489702714 |
| H | -4.9524653200 | 5.4225722854 | -1.2367079769 |
| H | -3.4016189567 | 6.1375780386 | -1.7521380358 |
| H | -4.9869647906 | 4.9214134728 | -3.6383295494 |
| H | -3.2468139173 | 4.5833633600 | -3.6367562972 |



---

|   |               |              |               |
|---|---------------|--------------|---------------|
| H | -5.4718903821 | 2.8032809264 | -2.6236689022 |
| H | -3.8991107013 | 2.3407058111 | -3.2775726038 |

## TS1

M06-2X/6-31G(d,p) Electronic E: -2774.346697 a.u.

M06-2X/6-31G(d,p) Gibbs free E: -2773.480376 a.u.

M06-2X/cc-pVTZ Electronic E: -2775.064086 a.u.

|    |               |               |               |
|----|---------------|---------------|---------------|
| B  | -1.7582209720 | 0.4769621305  | -0.8220021031 |
| O  | -2.5884721545 | 1.4550014254  | -1.3847964304 |
| O  | -2.2846840002 | -0.0336422586 | 0.3534542948  |
| C  | -3.5908991521 | 1.7885787833  | -0.4170080022 |
| C  | -3.5948421938 | 0.5257789726  | 0.5256025234  |
| C  | -4.9092065836 | 2.0120809512  | -1.1500525721 |
| H  | -5.7290858092 | 2.1539348969  | -0.4385209509 |
| H  | -4.8358708074 | 2.9153594231  | -1.7642168359 |
| H  | -5.1509654858 | 1.1706485250  | -1.8039671297 |
| C  | -3.1771492430 | 3.0816215444  | 0.2793156656  |
| H  | -3.0138315619 | 3.8340951272  | -0.4993970138 |
| H  | -3.9561397219 | 3.4369379121  | 0.9611610625  |
| H  | -2.2409277942 | 2.9544366288  | 0.8234636656  |
| C  | -3.7998360990 | 0.8478771424  | 1.9979223832  |
| H  | -4.7675396287 | 1.3345707743  | 2.1581078348  |
| H  | -3.7796739243 | -0.0776182641 | 2.5788453115  |
| H  | -3.0064379728 | 1.5002786371  | 2.3666325473  |
| C  | -4.5857799205 | -0.5485732395 | 0.0738945482  |
| H  | -4.4158286338 | -1.4499892631 | 0.6684617148  |
| H  | -5.6245911205 | -0.2337536031 | 0.2078122831  |
| H  | -4.4262712699 | -0.8027752165 | -0.9792804155 |
| Si | 0.4654699682  | 2.1206284716  | 0.4903497941  |
| C  | 1.4239040410  | 1.0293986289  | 1.7735395477  |
| H  | 2.1143189432  | 0.3272562180  | 1.2946886775  |
| H  | 2.0151671396  | 1.6506987822  | 2.4562015858  |
| H  | 0.7264168262  | 0.4351072928  | 2.3752568180  |
| C  | 0.0926225879  | 3.6361899825  | 1.6514909784  |
| H  | 1.0120550078  | 4.0466175945  | 2.0875090679  |
| H  | -0.4502899881 | 4.4649696277  | 1.1786911035  |
| H  | -0.5335169972 | 3.2933704274  | 2.4858222512  |
| C  | 1.9785548486  | 2.8100870591  | -0.5160604320 |
| C  | 2.2785422196  | 4.1781456883  | -0.6548148255 |
| C  | 2.8435549983  | 1.9232981814  | -1.1891570425 |
| C  | 3.3763943952  | 4.6320397436  | -1.3868002652 |

---

|   |               |               |                |
|---|---------------|---------------|----------------|
| H | 1.6539118935  | 4.9109986777  | -0.1454859527  |
| C | 3.9565257112  | 2.3603091867  | -1.9062015536  |
| H | 2.6573454293  | 0.8494054041  | -1.1146318291  |
| C | 4.2318527040  | 3.7239750717  | -2.0065749602  |
| H | 3.5784725037  | 5.6982585101  | -1.4544534435  |
| H | 4.6199019834  | 1.6376899016  | -2.3768876604  |
| H | 5.0988919006  | 4.0720976817  | -2.5602925360  |
| C | -0.4314510227 | -1.5077853854 | -1.5179496585  |
| O | -0.9363891255 | -0.1822068380 | -1.7138381410  |
| C | 0.4886272012  | -1.7480089692 | -2.7108354634  |
| H | 0.9377167247  | -2.7446100069 | -2.6660770371  |
| H | -0.0731763886 | -1.6540254744 | -3.6467876348  |
| H | 1.2865660379  | -0.9982287557 | -2.7109257589  |
| C | 0.3545271523  | -1.6092133683 | -0.2147981754  |
| H | 1.2050760830  | -0.9248128610 | -0.2343650953  |
| H | -0.2727005870 | -1.3438923490 | 0.6394330885   |
| H | 0.7252187564  | -2.6308050810 | -0.0828441276  |
| C | -1.5999375348 | -2.4938312438 | -1.5333270574  |
| H | -2.1847413288 | -2.3681687208 | -2.4507032006  |
| H | -1.2320553069 | -3.5235481539 | -1.4939799263  |
| H | -2.2496428966 | -2.3212002834 | -0.6722297651  |
| K | -0.2812060267 | 2.2210024547  | -2.8242469485  |
| C | 0.5238354642  | 0.4777455869  | -5.9369661877  |
| O | 1.1763722393  | 1.0850789712  | -4.8149275683  |
| C | 2.5172985636  | 0.5970641917  | -4.7034259764  |
| C | 2.5697743069  | -0.6591197967 | -5.5651828523  |
| C | 1.6115272689  | -0.2801159041 | -6.6964364778  |
| H | -0.2557702513 | -0.1971122164 | -5.5662009217  |
| H | 0.0402355483  | 1.2614842272  | -6.5289916891  |
| H | 3.2139568920  | 1.3614496535  | -5.0789332876  |
| H | 2.7345241379  | 0.4287586093  | -3.6458356406  |
| H | 3.5798567201  | -0.8929839046 | -5.9065339614  |
| H | 2.1805281611  | -1.5171279601 | -5.0076400013  |
| H | 2.1144633246  | 0.3822318846  | -7.4094705801  |
| H | 1.2176755040  | -1.1380055215 | -7.2445638810  |
| C | 2.0892021230  | 4.1292289022  | -4.71110745590 |
| O | 0.7249871619  | 4.2411886502  | -4.2908318695  |
| C | -0.1449581910 | 4.2169909661  | -5.4183742892  |
| C | 0.7346737675  | 4.5407803425  | -6.6225168160  |
| C | 2.0515525939  | 3.8717165920  | -6.2179691513  |
| H | 2.6027947377  | 5.0687298231  | -4.4720095505  |

---

|   |               |               |               |
|---|---------------|---------------|---------------|
| H | 2.5675207200  | 3.3284390895  | -4.1393572327 |
| H | -0.5913233608 | 3.2143058940  | -5.5172892345 |
| H | -0.9487830920 | 4.9387038713  | -5.2442559414 |
| H | 0.3227495600  | 4.1625810968  | -7.5608271193 |
| H | 0.8682384195  | 5.6234250264  | -6.7132441040 |
| H | 1.9964463890  | 2.7957681322  | -6.4117171135 |
| H | 2.9230237454  | 4.2776528784  | -6.7355433393 |
| C | -2.8584926525 | 5.4266226224  | -2.9552163010 |
| O | -1.7803671053 | 4.5314775805  | -2.7035777730 |
| C | -0.8732999958 | 5.1047572129  | -1.7433771980 |
| C | -1.5800762663 | 6.3376306755  | -1.1882273880 |
| C | -2.4198024634 | 6.7759952724  | -2.3911613798 |
| H | -3.0559534593 | 5.4480112924  | -4.0326592709 |
| H | -3.7641272603 | 5.0644276004  | -2.4453549788 |
| H | -0.6643884185 | 4.3491870977  | -0.9770805780 |
| H | 0.0580485377  | 5.3590756431  | -2.2609476260 |
| H | -2.2295104443 | 6.0641493267  | -0.3496141328 |
| H | -0.8779045440 | 7.0991436986  | -0.8437350772 |
| H | -3.2630017810 | 7.4186762708  | -2.1306190144 |
| H | -1.7919339133 | 7.3010733314  | -3.1184892902 |
| C | -2.8605198418 | 0.0923335872  | -4.3149084533 |
| O | -2.2061990855 | 1.3349825457  | -4.5535167169 |
| C | -3.2259502985 | 2.3350849588  | -4.4953926038 |
| C | -4.5293884060 | 1.6618946140  | -4.9820690022 |
| C | -4.1321675229 | 0.1823920700  | -5.1538488236 |
| H | -2.1794991546 | -0.7111150834 | -4.6079791026 |
| H | -3.0865602926 | -0.0049407891 | -3.2455488929 |
| H | -3.3173563047 | 2.6878235470  | -3.4617662743 |
| H | -2.9032195041 | 3.1685251163  | -5.1255333144 |
| H | -5.3177873127 | 1.7761732007  | -4.2339820399 |
| H | -4.8936083589 | 2.0941555897  | -5.9160356887 |
| H | -4.9076863974 | -0.5099585318 | -4.8197333591 |
| H | -3.9038340124 | -0.0349246607 | -6.2007811781 |

### III

M06-2X/6-31G(d,p) Electronic E: -2774.358519 a.u.

M06-2X/6-31G(d,p) Gibbs free E: -2773.493402 a.u.

M06-2X/cc-pVTZ Electronic E: -2775.077529 a.u.

|   |               |               |              |
|---|---------------|---------------|--------------|
| B | -2.0260608189 | -1.8133569743 | 1.2902219190 |
| O | -2.5666405066 | -0.5631541312 | 1.0746149382 |
| O | -2.3491472026 | -2.3418651172 | 2.5137960941 |

---

|    |               |               |               |
|----|---------------|---------------|---------------|
| C  | -3.1261221466 | -0.1262266958 | 2.3353124594  |
| C  | -3.3797999804 | -1.4896990492 | 3.0661335694  |
| C  | -4.3744539558 | 0.6888521580  | 2.0389672366  |
| H  | -4.8858130415 | 0.9627654125  | 2.9671628541  |
| H  | -4.0776545136 | 1.6076651634  | 1.5246543946  |
| H  | -5.0699649748 | 0.1396942268  | 1.4002306430  |
| C  | -2.0797028684 | 0.7349009092  | 3.0302052546  |
| H  | -1.8472576219 | 1.5763192573  | 2.3732766716  |
| H  | -2.4529538330 | 1.1206554934  | 3.9835451888  |
| H  | -1.1542388272 | 0.1770375605  | 3.1988310691  |
| C  | -3.2127614342 | -1.4394527174 | 4.5746373243  |
| H  | -3.9232541300 | -0.7323991334 | 5.0141904074  |
| H  | -3.4058878485 | -2.4284380603 | 4.9976625333  |
| H  | -2.1998235120 | -1.1387629699 | 4.8458831270  |
| C  | -4.7173965787 | -2.1223822160 | 2.6880210202  |
| H  | -4.7446423518 | -3.1464129903 | 3.0682629233  |
| H  | -5.5577473853 | -1.5678429502 | 3.1140666705  |
| H  | -4.8373916214 | -2.1565693747 | 1.6001445016  |
| Si | 1.7789260018  | 0.0595952200  | 2.2777246357  |
| C  | 2.9524163960  | -1.4027621544 | 2.7788044967  |
| H  | 3.3165920321  | -1.9734896075 | 1.9138793425  |
| H  | 3.8294161939  | -1.0654436113 | 3.3444663015  |
| H  | 2.4017917042  | -2.1142074291 | 3.4064201130  |
| C  | 1.4148844641  | 0.8401443826  | 4.0141160829  |
| H  | 2.3281656038  | 1.1006554794  | 4.5616991077  |
| H  | 0.7991769928  | 1.7453421945  | 3.9368605164  |
| H  | 0.8472400036  | 0.1306951755  | 4.6297932531  |
| C  | 3.0727131685  | 1.3177697824  | 1.5826485954  |
| C  | 2.8716204655  | 2.7108317477  | 1.6606989394  |
| C  | 4.1926567752  | 0.9063661304  | 0.8342315342  |
| C  | 3.6877251550  | 3.6244445226  | 0.9980207901  |
| H  | 2.0482885603  | 3.0908025505  | 2.2649992747  |
| C  | 5.0117807825  | 1.8072075790  | 0.1540545243  |
| H  | 4.4308563634  | -0.1557308954 | 0.7809788139  |
| C  | 4.7552368531  | 3.1761899550  | 0.2192633647  |
| H  | 3.4955380446  | 4.6910027430  | 1.0905827565  |
| H  | 5.8619036523  | 1.4425360592  | -0.4179818344 |
| H  | 5.3918893592  | 3.8828934967  | -0.3046145269 |
| C  | -0.7163465450 | -3.7027139489 | 0.3827750167  |
| O  | -1.3227373473 | -2.3944294609 | 0.2840060511  |
| C  | -0.0605131601 | -3.9211646895 | -0.9751561658 |

---

|   |               |               |               |
|---|---------------|---------------|---------------|
| H | 0.5135311518  | -4.8520729515 | -0.9808602853 |
| H | -0.8200056367 | -3.9754890832 | -1.7630349347 |
| H | 0.6072068598  | -3.0818567292 | -1.1938301735 |
| C | 0.3300615416  | -3.6895298416 | 1.4920052472  |
| H | 1.0680365972  | -2.9030529729 | 1.3063557034  |
| H | -0.1360248420 | -3.4898427928 | 2.4605693037  |
| H | 0.8381312301  | -4.6573595283 | 1.5407143307  |
| C | -1.8025169326 | -4.7466929065 | 0.6317255466  |
| H | -2.5755842587 | -4.6719282291 | -0.1402524294 |
| H | -1.3707708185 | -5.7507236159 | 0.5915926470  |
| H | -2.2629883011 | -4.6024524302 | 1.6110351705  |
| K | -0.3233733841 | 0.2068646960  | -0.3961967111 |
| C | 1.6612657949  | -1.6858400654 | -3.3868941274 |
| O | 1.4733762419  | -1.0139694060 | -2.1391407378 |
| C | 2.6358086630  | -1.1894092372 | -1.3089855320 |
| C | 3.3664658877  | -2.3941355796 | -1.8859936904 |
| C | 3.0988304079  | -2.2126716130 | -3.3827728265 |
| H | 0.9343730998  | -2.5069334003 | -3.4561655166 |
| H | 1.4672937664  | -0.9822989236 | -4.2052823510 |
| H | 3.2587296934  | -0.2879513327 | -1.3625048369 |
| H | 2.2998870449  | -1.3093236831 | -0.2721994079 |
| H | 4.4280462804  | -2.3968973661 | -1.6314050407 |
| H | 2.9202414855  | -3.3258957207 | -1.5234547211 |
| H | 3.7803947515  | -1.4618017307 | -3.7958612396 |
| H | 3.2072048795  | -3.1299210773 | -3.9647387933 |
| C | 2.0144224761  | 2.3502596335  | -1.8261310988 |
| O | 0.6236244697  | 2.0700429384  | -2.0504560139 |
| C | 0.3787222130  | 1.8458295906  | -3.4379885766 |
| C | 1.6387812171  | 2.3156540488  | -4.1629060389 |
| C | 2.7203242235  | 1.9924187409  | -3.1288255865 |
| H | 2.1279169886  | 3.4175765293  | -1.5894993439 |
| H | 2.3617531913  | 1.7769467106  | -0.9595642458 |
| H | 0.1996123927  | 0.7748113277  | -3.5967589674 |
| H | -0.5257310186 | 2.3923104262  | -3.7256915406 |
| H | 1.7829599924  | 1.8140371244  | -5.1226701773 |
| H | 1.5952588739  | 3.3952658193  | -4.3416273430 |
| H | 2.9469840597  | 0.9210235776  | -3.1505760387 |
| H | 3.6489434354  | 2.5498707342  | -3.2642166414 |
| C | -2.0052155460 | 3.2834420457  | -0.9748002645 |
| O | -1.5275329992 | 2.5748371387  | 0.1749671787  |
| C | -0.3957116381 | 3.2532673135  | 0.7267778018  |

---

|   |               |               |               |
|---|---------------|---------------|---------------|
| C | -0.5324874255 | 4.6997401061  | 0.2699711624  |
| C | -1.1113195061 | 4.5193902129  | -1.1377543107 |
| H | -1.9597233246 | 2.6199031233  | -1.8454979950 |
| H | -3.0518762241 | 3.5570158612  | -0.7901576975 |
| H | -0.4153585807 | 3.1218664064  | 1.8129495531  |
| H | 0.5352438881  | 2.8114578442  | 0.3479877989  |
| H | -1.2374515990 | 5.2361502236  | 0.9130071040  |
| H | 0.4234039908  | 5.2284296479  | 0.2812512929  |
| H | -1.6673851995 | 5.3909229497  | -1.4896604600 |
| H | -0.3072693063 | 4.3008762776  | -1.8453043536 |
| C | -1.8749550447 | -1.1535078976 | -2.9783429720 |
| O | -2.1399701003 | 0.1170538786  | -2.3739808804 |
| C | -3.4917404471 | 0.1720239907  | -1.9057148260 |
| C | -3.9555871316 | -1.2782761886 | -1.8364779361 |
| C | -3.2112189766 | -1.8976670910 | -3.0221414734 |
| H | -1.4415620611 | -0.9896301639 | -3.9716589614 |
| H | -1.1415023764 | -1.6900202957 | -2.3610391521 |
| H | -3.4928987789 | 0.6697344552  | -0.9317486362 |
| H | -4.0961647708 | 0.7533984158  | -2.6161920739 |
| H | -3.6106567397 | -1.7257213215 | -0.9004564882 |
| H | -5.0410416544 | -1.3789813256 | -1.9034057099 |
| H | -3.0852160283 | -2.9794147977 | -2.9358616614 |
| H | -3.7385315045 | -1.6857905123 | -3.9576058042 |

#### IV

M06-2X/6-31G(d,p) Electronic E: -2174.211575 a.u.

M06-2X/6-31G(d,p) Gibbs free E: -2173.492466 a.u.

M06-2X/cc-pVTZ Electronic E: -2174.789762 a.u.

|   |               |               |               |
|---|---------------|---------------|---------------|
| B | -0.5527444282 | -0.0233054668 | -0.9219112790 |
| O | -1.0545638522 | 0.5056323189  | -2.1756780029 |
| O | -1.7839534193 | -0.3657545147 | -0.1493090059 |
| C | -2.2707619475 | -0.1470977702 | -2.4711674386 |
| C | -2.8682686687 | -0.5261841823 | -1.0426320296 |
| C | -1.9659228036 | -1.3723687365 | -3.3464596403 |
| H | -2.8717799892 | -1.9117733195 | -3.6410123823 |
| H | -1.4660720158 | -1.0222237754 | -4.2547937195 |
| H | -1.2890583625 | -2.0520484029 | -2.8258037849 |
| C | -3.1466953157 | 0.8119477641  | -3.2751582723 |
| H | -2.6370095852 | 1.0539308256  | -4.2117603151 |
| H | -4.1151476987 | 0.3613659856  | -3.5173734766 |
| H | -3.3188195819 | 1.7453829112  | -2.7352302938 |

---

|   |               |               |               |
|---|---------------|---------------|---------------|
| C | -3.9990387401 | 0.3990666315  | -0.5807477665 |
| H | -4.8968364492 | 0.2912160117  | -1.1975507916 |
| H | -4.2581674908 | 0.1389097511  | 0.4511536906  |
| H | -3.6890800911 | 1.4446255868  | -0.5895072855 |
| C | -3.3762594111 | -1.9691258795 | -0.9715828934 |
| H | -3.7808079712 | -2.1551291993 | 0.0290213246  |
| H | -4.1770362265 | -2.1546008605 | -1.6954763205 |
| H | -2.5616274905 | -2.6744065350 | -1.1523513806 |
| C | 1.4728977964  | -1.4454869446 | -1.5715770562 |
| O | 0.1855951499  | -1.3150777566 | -0.9968000112 |
| C | 1.6966172120  | -0.4896691582 | -2.7461942523 |
| H | 1.6408919397  | 0.5477833201  | -2.4119574128 |
| H | 2.6818005034  | -0.6687345512 | -3.1903663922 |
| H | 0.9274633847  | -0.6368994066 | -3.5076420943 |
| C | 2.5411097006  | -1.2076000022 | -0.4929989154 |
| H | 2.4572380021  | -0.1859237370 | -0.1108143198 |
| H | 2.3884572731  | -1.9128277996 | 0.3351917898  |
| H | 3.5518553684  | -1.3632440524 | -0.8866256564 |
| C | 1.5735735267  | -2.8901778646 | -2.0674637649 |
| H | 1.3671122745  | -3.5808757074 | -1.2433359940 |
| H | 0.8362121927  | -3.0691036653 | -2.8553047228 |
| H | 2.5700932148  | -3.1069045989 | -2.4664336088 |
| C | 0.1678860833  | 2.3048924533  | -0.1337945910 |
| O | 0.3164956705  | 0.8990385334  | -0.1837124506 |
| C | 0.9586944662  | 2.7497920907  | 1.0997718877  |
| H | 1.9853125773  | 2.3738534876  | 1.0309973836  |
| H | 0.9857802128  | 3.8401988827  | 1.1900571442  |
| H | 0.5017858415  | 2.3402426383  | 2.0094369420  |
| C | 0.7730682147  | 2.9321551523  | -1.3930511785 |
| H | 0.6811407516  | 4.0234485952  | -1.3723631180 |
| H | 1.8355890895  | 2.6761544399  | -1.4639545196 |
| H | 0.2555109395  | 2.5432491820  | -2.2732322801 |
| C | -1.2936135110 | 2.7343639458  | 0.0070661251  |
| H | -1.8357950730 | 2.4855821115  | -0.9070610104 |
| H | -1.7680674425 | 2.2115616973  | 0.8433268805  |
| H | -1.3572706050 | 3.8143278906  | 0.1770524609  |
| K | 0.0588177891  | -0.9206440836 | 1.6881269939  |
| C | 3.4556657485  | -0.9140484931 | 2.9037637540  |
| O | 2.2088297049  | -0.2792996485 | 3.1727463575  |
| C | 2.5214168371  | 0.8242296890  | 4.0122600579  |
| C | 3.5354589854  | 0.2697266471  | 5.0210130834  |

---

|   |               |               |              |
|---|---------------|---------------|--------------|
| C | 4.2249699214  | -0.8734211951 | 4.2365876912 |
| H | 3.2390964476  | -1.9191673994 | 2.5355204540 |
| H | 3.9850639172  | -0.3548996201 | 2.1198285821 |
| H | 2.9603830553  | 1.6319111129  | 3.4095379498 |
| H | 1.5934636463  | 1.1842174357  | 4.4606490617 |
| H | 4.2360149727  | 1.0357279547  | 5.3580726425 |
| H | 3.0190363322  | -0.1234246157 | 5.8995979242 |
| H | 5.2885892276  | -0.6875250525 | 4.0762532625 |
| H | 4.1313413746  | -1.8222290895 | 4.7711682004 |
| C | -2.8288043490 | -2.0715415077 | 3.8631428749 |
| O | -1.6293119673 | -2.3972910095 | 3.1609932240 |
| C | -1.8981940067 | -3.4089482861 | 2.1755409258 |
| C | -3.3766239916 | -3.7750576890 | 2.3291497269 |
| C | -3.9625653640 | -2.4999753682 | 2.9410879455 |
| H | -2.8617761431 | -2.6232313178 | 4.8132953227 |
| H | -2.8176158979 | -1.0002722630 | 4.0792724616 |
| H | -1.6922867433 | -2.9902510534 | 1.1809400449 |
| H | -1.2252475047 | -4.2561145262 | 2.3490285802 |
| H | -3.8323956502 | -4.0495642867 | 1.3758416094 |
| H | -3.4962519818 | -4.6133489342 | 3.0228472078 |
| H | -4.1178379501 | -1.7402285646 | 2.1685091318 |
| H | -4.9036142630 | -2.6630958136 | 3.4698143693 |
| C | 1.6110207223  | -4.3930324652 | 1.6260197347 |
| O | 1.2120852084  | -3.2227060992 | 2.3499501528 |
| C | 1.3050823249  | -3.4565696538 | 3.7583745258 |
| C | 2.2722757241  | -4.6253477406 | 3.8977185776 |
| C | 1.8851844651  | -5.4687565954 | 2.6797967341 |
| H | 0.8151794296  | -4.6639102164 | 0.9249302129 |
| H | 2.5119987468  | -4.1526161421 | 1.0476255022 |
| H | 1.6440950577  | -2.5271719742 | 4.2267163141 |
| H | 0.3098288625  | -3.7039175159 | 4.1506815757 |
| H | 3.3068906506  | -4.2752786006 | 3.8054218780 |
| H | 2.1676344404  | -5.1545674579 | 4.8466801109 |
| H | 2.6585603877  | -6.1723086353 | 2.3670003640 |
| H | 0.9729520070  | -6.0350617954 | 2.8946905163 |

#### V-1

M06-2X/6-31G(d,p) Electronic E: -2130.191742 a.u.

M06-2X/6-31G(d,p) Gibbs free E: -2129.621596 a.u.

M06-2X/cc-pVTZ Electronic E: -2130.681220 a.u.

|    |              |               |               |
|----|--------------|---------------|---------------|
| Si | 3.3976920642 | -0.9820236909 | -0.1840142846 |
|----|--------------|---------------|---------------|



---

|   |               |               |               |
|---|---------------|---------------|---------------|
| C | 4.5013228908  | -2.0198018050 | 1.0184768267  |
| H | 4.0318072207  | -2.1405817883 | 2.0013093556  |
| H | 4.7353046936  | -3.0174528577 | 0.6289416927  |
| H | 5.4486732807  | -1.4966744877 | 1.1904652156  |
| C | 4.3841378480  | -1.1780133023 | -1.8427756098 |
| H | 5.3711310773  | -0.7154269430 | -1.7255993442 |
| H | 4.5406905687  | -2.2281444898 | -2.1181332340 |
| H | 3.9109902476  | -0.6767486221 | -2.6965101905 |
| C | 1.9252113572  | -2.1986332090 | -0.4833156091 |
| C | 1.2757965809  | -2.3079003775 | -1.7321460212 |
| C | 1.2568861464  | -2.8055629837 | 0.6027459657  |
| C | 0.0233227981  | -2.9065589484 | -1.8771490872 |
| H | 1.7658031231  | -1.9055574664 | -2.6187991117 |
| C | 0.0176534328  | -3.4270993941 | 0.4675160635  |
| H | 1.7230123822  | -2.7755776770 | 1.5880895999  |
| C | -0.6264254938 | -3.4581801365 | -0.7721888503 |
| H | -0.4438444259 | -2.9559779437 | -2.8580188488 |
| H | -0.4482133679 | -3.8972232961 | 1.3318723054  |
| H | -1.5969835314 | -3.9328906669 | -0.8822115420 |
| K | 0.1261044056  | 0.0456626863  | -0.0117478009 |
| C | 0.9316583786  | 3.3587412241  | -1.6782463519 |
| O | 0.7809003787  | 1.9440201165  | -1.7648807784 |
| C | 1.7593632836  | 1.4716960665  | -2.6867668549 |
| C | 3.0051545429  | 2.2980218516  | -2.3865231011 |
| C | 2.4230721206  | 3.6578030720  | -1.9435939570 |
| H | 0.2944262989  | 3.8381607888  | -2.4373565715 |
| H | 0.5864814790  | 3.6598870641  | -0.6860994353 |
| H | 1.9010799453  | 0.4026117807  | -2.5027344300 |
| H | 1.4013298147  | 1.6253292983  | -3.7183315342 |
| H | 3.5486182158  | 1.8144569726  | -1.5687665351 |
| H | 3.6693039493  | 2.3788857715  | -3.2492341653 |
| H | 2.9225923863  | 4.0293376377  | -1.0464437781 |
| H | 2.5303159814  | 4.4174444746  | -2.7212736337 |
| C | -1.5942566125 | 0.2600930762  | -3.0217100396 |
| O | -1.9592671945 | 0.3675863635  | -1.6395060592 |
| C | -2.4206830620 | 1.6894236730  | -1.3528771497 |
| C | -2.8447370992 | 2.2667928736  | -2.6989033141 |
| C | -1.8024461285 | 1.6470788949  | -3.6348372323 |
| H | -0.5547182701 | -0.0801361610 | -3.0928777162 |
| H | -2.2398012706 | -0.4954245197 | -3.4843735649 |
| H | -3.2366976406 | 1.6115064200  | -0.6286778450 |

---

|   |               |               |               |
|---|---------------|---------------|---------------|
| H | -1.6050886317 | 2.2789382846  | -0.9101319904 |
| H | -3.8498762489 | 1.9200819139  | -2.9583110392 |
| H | -2.8398604410 | 3.3586183952  | -2.7088446201 |
| H | -2.1304306151 | 1.5971073965  | -4.6748067112 |
| H | -0.8714401308 | 2.2176576924  | -3.5851536570 |
| C | -1.4470997110 | -1.3417013107 | 3.0186386225  |
| O | -1.7069492878 | -0.6112782560 | 1.8137706807  |
| C | -2.9459053392 | -1.0347224217 | 1.2313676402  |
| C | -3.2452792555 | -2.3901132790 | 1.8593854952  |
| C | -2.6867853106 | -2.2025059971 | 3.2729708942  |
| H | -0.5521271939 | -1.9558302058 | 2.8624770499  |
| H | -1.2462931223 | -0.6309412133 | 3.8277069727  |
| H | -3.7282112500 | -0.3039007953 | 1.4806051227  |
| H | -2.8165188001 | -1.0636420175 | 0.1456629107  |
| H | -4.3089592477 | -2.6354730127 | 1.8439636974  |
| H | -2.6963829381 | -3.1733413232 | 1.3293420401  |
| H | -3.4071635106 | -1.6614037498 | 3.8941928734  |
| H | -2.4425014488 | -3.1420648484 | 3.7722731821  |
| C | 0.1224611343  | 1.9678765418  | 2.7441170606  |
| O | 0.5002135262  | 2.3095848884  | 1.4144956672  |
| C | 1.9226052684  | 2.5199310506  | 1.4091941714  |
| C | 2.4876712238  | 1.7946597893  | 2.6456661490  |
| C | 1.2601786671  | 1.0734113922  | 3.2234767436  |
| H | 0.0506803338  | 2.8746279233  | 3.3641889364  |
| H | -0.8554867390 | 1.4820843394  | 2.6963437096  |
| H | 2.3150229958  | 2.0857716732  | 0.4829679340  |
| H | 2.1259391884  | 3.5990520177  | 1.4354973167  |
| H | 3.2736246437  | 1.0943627685  | 2.3524721880  |
| H | 2.8895467067  | 2.5087699931  | 3.3695268128  |
| H | 1.1662357195  | 0.0750034452  | 2.7750769162  |
| H | 1.2946708585  | 0.9591846754  | 4.3094218469  |

## V

M06-2X/6-31G(d,p) Electronic E: -1897.823682 a.u.

M06-2X/6-31G(d,p) Gibbs free E: -1897.366516 a.u.

M06-2X/cc-pVTZ Electronic E: -1898.234927 a.u.

|    |              |               |              |
|----|--------------|---------------|--------------|
| Si | 2.2968534843 | -0.8683367336 | 0.9367538042 |
| C  | 2.5982179134 | -2.5413822032 | 1.8623984850 |
| H  | 1.7141682834 | -2.9088799203 | 2.3973900209 |
| H  | 2.9340673652 | -3.3369544546 | 1.1859231471 |
| H  | 3.3761929290 | -2.3953772423 | 2.6201948139 |

---

|   |               |               |               |
|---|---------------|---------------|---------------|
| C | 4.0203178822  | -0.6400595637 | 0.0784125294  |
| H | 4.7910695498  | -0.4599958778 | 0.8374081278  |
| H | 4.3171114711  | -1.5259159692 | -0.4951650439 |
| H | 4.0456755455  | 0.2204023486  | -0.6019131422 |
| C | 1.2782149372  | -1.5179181102 | -0.5902720208 |
| C | 1.3571653477  | -0.8983158587 | -1.8558548987 |
| C | 0.3993234374  | -2.6164005894 | -0.5049800381 |
| C | 0.6486143867  | -1.3621943868 | -2.9635407046 |
| H | 2.0358396104  | -0.0554264358 | -1.9904839914 |
| C | -0.3256544025 | -3.0843196463 | -1.6020118812 |
| H | 0.3154210446  | -3.1511414038 | 0.4404161416  |
| C | -0.2014784618 | -2.4621184720 | -2.8436218268 |
| H | 0.7695092175  | -0.8741738081 | -3.9277534403 |
| H | -0.9732763171 | -3.9512695052 | -1.4920989063 |
| H | -0.7477988107 | -2.8339848651 | -3.7052697219 |
| K | -0.2954758355 | 1.0743314884  | 0.7515642252  |
| C | -2.2874957280 | -0.1211467178 | -1.5964231961 |
| O | -2.4245622984 | 1.0817817005  | -0.8379423814 |
| C | -3.3580289226 | 1.9175774500  | -1.5256528782 |
| C | -3.3421808574 | 1.4729276040  | -3.0065632790 |
| C | -2.2765198322 | 0.3641443810  | -3.0379995236 |
| H | -1.3717510845 | -0.6305656229 | -1.2838120106 |
| H | -3.1459610049 | -0.7850919499 | -1.4065369787 |
| H | -4.3534129076 | 1.7923358181  | -1.0815549981 |
| H | -3.0411521229 | 2.9526357539  | -1.3803404002 |
| H | -4.3193704096 | 1.0781523964  | -3.2951475823 |
| H | -3.1046187163 | 2.2967550096  | -3.6815304766 |
| H | -2.4960676629 | -0.4293760626 | -3.7543026034 |
| H | -1.2882224947 | 0.7706704823  | -3.2700211153 |
| C | -1.2068576548 | -1.6281629913 | 2.7127305310  |
| O | -1.9008397307 | -0.5526714423 | 2.0570324716  |
| C | -3.1818941722 | -1.0231644832 | 1.6538589594  |
| C | -2.9291424758 | -2.4690929712 | 1.2482522518  |
| C | -1.9617698609 | -2.9221802114 | 2.3504459104  |
| H | -0.1731145115 | -1.6151446302 | 2.3524509451  |
| H | -1.2005309743 | -1.4472594790 | 3.7932195442  |
| H | -3.8874888269 | -0.9685796066 | 2.4967732506  |
| H | -3.5314105144 | -0.3713383139 | 0.8498951838  |
| H | -3.8397106438 | -3.0700768227 | 1.2014471631  |
| H | -2.4321519088 | -2.4947762577 | 0.2727819372  |
| H | -2.5197394788 | -3.2946457205 | 3.2141017867  |

---

|   |               |               |               |
|---|---------------|---------------|---------------|
| H | -1.2860954471 | -3.7143808280 | 2.0217256547  |
| C | 1.7451824948  | 3.3933998946  | 2.1761779030  |
| O | 1.3261510438  | 3.1743223383  | 0.8228192897  |
| C | 2.4750765264  | 2.9325670755  | -0.0070670291 |
| C | 3.6761734455  | 2.8746975128  | 0.9333055127  |
| C | 3.2194658074  | 3.7674296955  | 2.0891204574  |
| H | 1.1124461418  | 4.1758446818  | 2.6040087586  |
| H | 1.6228728184  | 2.4630648976  | 2.7496330141  |
| H | 2.3330081333  | 1.9878935293  | -0.5459837110 |
| H | 2.5533508948  | 3.7534239654  | -0.7299632926 |
| H | 3.8089506537  | 1.8471036052  | 1.2852410077  |
| H | 4.5971438885  | 3.2125315612  | 0.4541069362  |
| H | 3.7537804550  | 3.5733052613  | 3.0209401367  |
| H | 3.3294352009  | 4.8263626158  | 1.8338994518  |

### V'

M06-2X/6-31G(d,p) Electronic E: -2909.801156 a.u.

M06-2X/6-31G(d,p) Gibbs free E: -2909.009242 a.u.

M06-2X/cc-pVTZ Electronic E: -2910.491168 a.u.

|    |               |               |               |
|----|---------------|---------------|---------------|
| B  | -1.1064180714 | -0.1832409885 | -0.0923665016 |
| O  | -1.6054380637 | 0.8666371323  | -1.0561249025 |
| O  | -2.3099311086 | -0.5655916474 | 0.6729746751  |
| C  | -2.8649941088 | 1.3150285755  | -0.5808180092 |
| C  | -3.4507697398 | 0.0369307954  | 0.0983382003  |
| C  | -3.6585070014 | 1.8496802041  | -1.7672315428 |
| H  | -4.6875615487 | 2.0984421013  | -1.4860107384 |
| H  | -3.1742337555 | 2.7647531570  | -2.1298369188 |
| H  | -3.6816510719 | 1.1231511661  | -2.5844328722 |
| C  | -2.6575106703 | 2.4373846094  | 0.4382172071  |
| H  | -1.9417112775 | 3.1536843968  | 0.0231118381  |
| H  | -3.5921783899 | 2.9604872856  | 0.6690399019  |
| H  | -2.2468947036 | 2.0385945493  | 1.3655762779  |
| C  | -4.4667564681 | 0.3211667704  | 1.2015772384  |
| H  | -5.3175743470 | 0.8976002493  | 0.8205699816  |
| H  | -4.8454405590 | -0.6257707539 | 1.5959108707  |
| H  | -4.0069974636 | 0.8675122705  | 2.0268398175  |
| C  | -4.0838928224 | -0.9040195008 | -0.9306014835 |
| H  | -4.2664813736 | -1.8728956528 | -0.4590786942 |
| H  | -5.0331776834 | -0.5138826391 | -1.3132536072 |
| H  | -3.4058517847 | -1.0619342256 | -1.7719394183 |
| Si | 0.3717002614  | 0.5839269760  | 1.1648309108  |

---

|    |               |               |               |
|----|---------------|---------------|---------------|
| C  | 1.5974149966  | -0.6611219124 | 1.9226424904  |
| H  | 2.2374379640  | -1.1495760531 | 1.1851904146  |
| H  | 2.2447872795  | -0.1633458765 | 2.6517355208  |
| H  | 1.0500317791  | -1.4513779769 | 2.4479684334  |
| C  | -0.1552781434 | 1.6241914193  | 2.6788185532  |
| H  | 0.6766176808  | 1.7169361713  | 3.3841618845  |
| H  | -0.4963179441 | 2.6333832562  | 2.4332958304  |
| H  | -0.9796146820 | 1.1208718686  | 3.1966166727  |
| C  | 1.4112731351  | 1.7393262740  | 0.0479463698  |
| C  | 1.1504786989  | 3.1155952369  | -0.0542367556 |
| C  | 2.3797587463  | 1.2159280153  | -0.8273167560 |
| C  | 1.8125249134  | 3.9272838728  | -0.9760245951 |
| H  | 0.4153734546  | 3.5684891074  | 0.6078369959  |
| C  | 3.0540860185  | 2.0172751161  | -1.7485169121 |
| H  | 2.6232226142  | 0.1563006459  | -0.7805093684 |
| C  | 2.7667341824  | 3.3802872148  | -1.8331436921 |
| H  | 1.5888693147  | 4.9907420623  | -1.0191445484 |
| H  | 3.8129971242  | 1.5801578867  | -2.3913110343 |
| H  | 3.2845714021  | 4.0082442562  | -2.5534848066 |
| K  | -0.0934910663 | 2.0207458405  | -2.9051083721 |
| Si | -0.3815001010 | -1.7827654564 | -1.2514829214 |
| C  | -1.6360538661 | -3.2173677241 | -1.3425294602 |
| H  | -2.4245113826 | -3.0353321483 | -2.0779446186 |
| H  | -1.1401875234 | -4.1557740052 | -1.6103545607 |
| H  | -2.1188450368 | -3.3416049362 | -0.3682031217 |
| C  | 1.2502777960  | -2.6621700898 | -0.8033951449 |
| H  | 1.1890776880  | -3.0844804627 | 0.2043647692  |
| H  | 1.4281648792  | -3.4890336258 | -1.5003835341 |
| H  | 2.1303624123  | -2.0121656771 | -0.8268746448 |
| C  | -0.1186997064 | -1.2557738875 | -3.0786449358 |
| C  | 1.1304604132  | -1.2860691776 | -3.7191407492 |
| C  | -1.2145544562 | -0.8331042945 | -3.8544531263 |
| C  | 1.2770247411  | -0.9502788238 | -5.0676626102 |
| H  | 2.0067866925  | -1.6128155141 | -3.1632491717 |
| C  | -1.0797065824 | -0.4853322025 | -5.1960164581 |
| H  | -2.2018747328 | -0.7913601279 | -3.4002011119 |
| C  | 0.1706505701  | -0.5505257444 | -5.8131706076 |
| H  | 2.2525034306  | -1.0230297753 | -5.5430577496 |
| H  | -1.9559072139 | -0.1910181962 | -5.7667684528 |
| H  | 0.2733526904  | -0.3188362288 | -6.8703739275 |
| C  | -2.6601531406 | 3.5906233069  | -5.0595694561 |

---

|   |               |              |               |
|---|---------------|--------------|---------------|
| O | -1.3135892758 | 3.1445912383 | -5.1679118212 |
| C | -1.1387396587 | 2.7414499424 | -6.5242965949 |
| C | -2.5218499465 | 2.2627236718 | -7.0257207290 |
| C | -3.4487177433 | 2.5351467468 | -5.8259498583 |
| H | -2.8998955534 | 3.6775373175 | -4.0002186220 |
| H | -2.7654228738 | 4.5806323772 | -5.5345465997 |
| H | -0.7976817567 | 3.6021437646 | -7.1186691262 |
| H | -0.3606465788 | 1.9747233276 | -6.5364449574 |
| H | -2.8330925997 | 2.8445845050 | -7.8967422085 |
| H | -2.5169465247 | 1.2115722363 | -7.3202852532 |
| H | -4.4452630499 | 2.8686473619 | -6.1209538140 |
| H | -3.5507041061 | 1.6429541063 | -5.2001371294 |
| C | -1.6827220463 | 5.3440811319 | -1.4803842990 |
| O | -1.0604210673 | 4.5592791811 | -2.5008430101 |
| C | -0.2501064427 | 5.4007598902 | -3.3330432082 |
| C | -0.2693183872 | 6.7869882143 | -2.6891706292 |
| C | -1.6272347870 | 6.7807047374 | -1.9845726515 |
| H | -2.6957840203 | 4.9640219802 | -1.3232038418 |
| H | -1.1209115850 | 5.2349020627 | -0.5417671816 |
| H | 0.7526054388  | 4.9631371197 | -3.4006581875 |
| H | -0.6904342320 | 5.4168885912 | -4.3370443075 |
| H | 0.5341042542  | 6.8848661015 | -1.9516962438 |
| H | -0.1582008408 | 7.5877463093 | -3.4227499268 |
| H | -1.7088558984 | 7.5144095592 | -1.1808012181 |
| H | -2.4316693386 | 6.9600534693 | -2.7054428584 |
| C | 1.7704646250  | 4.0033546491 | -5.7365775523 |
| O | 1.6757992181  | 2.9191544901 | -4.8226281112 |
| C | 2.8266514949  | 2.1233996823 | -5.0708310349 |
| C | 2.8903652227  | 2.0322434697 | -6.5946395274 |
| C | 2.3459914831  | 3.4090297572 | -7.0395843509 |
| H | 0.7747079036  | 4.4358375676 | -5.8389955264 |
| H | 2.4495693699  | 4.7659349106 | -5.3248375812 |
| H | 3.7200613039  | 2.6259849633 | -4.6657139585 |
| H | 2.6925912108  | 1.1655061672 | -4.5659975990 |
| H | 3.8970740331  | 1.8285964295 | -6.9640687724 |
| H | 2.2301233061  | 1.2288803624 | -6.9338185855 |
| H | 3.1318490061  | 4.0479755113 | -7.4476147098 |
| H | 1.5750939545  | 3.3017722010 | -7.8059145346 |

## TS2

M06-2X/6-31G(d,p) Electronic E: -2207.342459 a.u.

---

M06-2X/6-31G(d,p) Gibbs free E: -2206.757451 a.u.

M06-2X/cc-pVTZ Electronic E: -2207.854203 a.u.

|    |               |               |               |
|----|---------------|---------------|---------------|
| Si | 2.5739166406  | -0.8316501177 | 0.4625063113  |
| C  | 3.3289632455  | -2.2582507808 | 1.5053348172  |
| H  | 2.5718120479  | -2.9934554990 | 1.7995993430  |
| H  | 4.1095577138  | -2.7924394090 | 0.9536994467  |
| H  | 3.7745124938  | -1.8717172733 | 2.4289168018  |
| C  | 4.1084912313  | -0.2178943159 | -0.5321302463 |
| H  | 4.8846579661  | 0.0797370648  | 0.1812418585  |
| H  | 4.5265242541  | -1.0132178122 | -1.1615504125 |
| H  | 3.9175150760  | 0.6531569272  | -1.1665264337 |
| C  | 1.4921923576  | -1.7257110208 | -0.8305821158 |
| C  | 1.4589630258  | -1.3344929036 | -2.1867014062 |
| C  | 0.4786092666  | -2.6196654039 | -0.4200945480 |
| C  | 0.4558242062  | -1.7576485814 | -3.0578225152 |
| H  | 2.2390932369  | -0.6782854009 | -2.5683195176 |
| C  | -0.5224775942 | -3.0560881406 | -1.2853258379 |
| H  | 0.4704376092  | -2.9698262374 | 0.6119072606  |
| C  | -0.5555751353 | -2.6103358836 | -2.6083017220 |
| H  | 0.4682836733  | -1.4320477398 | -4.0950702809 |
| H  | -1.2837454859 | -3.7467782190 | -0.9286926195 |
| H  | -1.3363683635 | -2.9447533239 | -3.2848452598 |
| C  | -0.3589858919 | 3.8209380243  | 2.1448732970  |
| C  | 0.0823242461  | 2.5063280796  | 2.2607204228  |
| C  | -0.8262068163 | 1.4221786307  | 2.2156375544  |
| C  | -2.1844038167 | 1.7366907904  | 1.9658200184  |
| C  | -2.6132529300 | 3.0510341067  | 1.8344342406  |
| C  | -1.7063100081 | 4.1109283947  | 1.9338327801  |
| H  | 0.3634249226  | 4.6298104069  | 2.2212817526  |
| H  | 1.1373923694  | 2.3110635222  | 2.4236811403  |
| H  | -2.9012921378 | 0.9209666522  | 1.8920778150  |
| H  | -3.6676392823 | 3.2536357829  | 1.6655226553  |
| H  | -2.0445129738 | 5.1382349081  | 1.8479669605  |
| C  | -0.4018461191 | 0.0490519993  | 2.3612626352  |
| H  | -1.1729576798 | -0.7086864996 | 2.2372810141  |
| C  | 0.9042699164  | -0.3463800869 | 2.5243009865  |
| H  | 1.6554581318  | 0.3434609551  | 2.8868781294  |
| H  | 1.1192579811  | -1.3911387787 | 2.7258020262  |
| K  | -0.6985842726 | 0.2164694502  | -0.5244336239 |
| C  | -0.4738983984 | 3.3971967444  | -1.3714232501 |
| O  | 0.1291818504  | 2.2799991593  | -2.0390778146 |

---

|   |               |               |               |
|---|---------------|---------------|---------------|
| C | 1.5590053904  | 2.3716035901  | -1.9531111747 |
| C | 1.8520755574  | 3.4766290705  | -0.9426896600 |
| C | 0.6492495516  | 4.4017921285  | -1.1370754864 |
| H | -1.2784925138 | 3.7875261239  | -2.0027896696 |
| H | -0.9101228468 | 3.0674304292  | -0.4177621508 |
| H | 1.9476421681  | 1.3997131927  | -1.6355221000 |
| H | 1.9589526683  | 2.6089243265  | -2.9474198789 |
| H | 1.8491404655  | 3.0597615572  | 0.0698183461  |
| H | 2.8138018913  | 3.9616542204  | -1.1208015306 |
| H | 0.4475106223  | 5.0428968814  | -0.2770722429 |
| H | 0.7892736811  | 5.0322222141  | -2.0215341789 |
| C | -2.4007668712 | 0.9438938829  | -3.3727195622 |
| O | -2.6372548605 | 1.2519715221  | -2.0037625595 |
| C | -3.6423658992 | 2.2606448385  | -1.9403416225 |
| C | -3.6155994720 | 2.9958330233  | -3.3005794096 |
| C | -2.4910197918 | 2.2895231665  | -4.0813710792 |
| H | -1.4173202133 | 0.4722049593  | -3.4428050486 |
| H | -3.1680155423 | 0.2420877064  | -3.7377143389 |
| H | -4.6195901914 | 1.7927542226  | -1.7589354983 |
| H | -3.4021963242 | 2.9022954843  | -1.0880316551 |
| H | -4.5741370759 | 2.8851057759  | -3.8133249668 |
| H | -3.4265016465 | 4.0651609087  | -3.1843735230 |
| H | -2.7104950251 | 2.1940651676  | -5.1464532657 |
| H | -1.5372538193 | 2.8096092213  | -3.9637027390 |
| C | -2.9345515326 | -2.3234289856 | 1.0851232988  |
| O | -2.9019386595 | -1.2035385183 | 0.1983058394  |
| C | -4.0777588774 | -1.2559111136 | -0.6004854082 |
| C | -4.2461171483 | -2.7385918821 | -0.9079277053 |
| C | -3.8522384593 | -3.3821197776 | 0.4317745504  |
| H | -1.9050541540 | -2.6676146058 | 1.2132672419  |
| H | -3.3202914308 | -2.0050512272 | 2.0621313302  |
| H | -4.9378446930 | -0.8707144204 | -0.0300898381 |
| H | -3.9095520670 | -0.6202877449 | -1.4705790173 |
| H | -5.2567034408 | -3.0003349266 | -1.2276125322 |
| H | -3.5439063920 | -3.0239271389 | -1.6968588836 |
| H | -4.7361044423 | -3.5554296782 | 1.0506596462  |
| H | -3.3475941625 | -4.3417637652 | 0.3014998098  |

## VI

M06-2X/6-31G(d,p) Electronic E: -2207.385512 a.u.



---

M06-2X/6-31G(d,p) Gibbs free E: -2206.798479 a.u.

M06-2X/cc-pVTZ Electronic E: -2207.901962 a.u.

|    |               |               |               |
|----|---------------|---------------|---------------|
| Si | 3.0696985156  | -1.3667808987 | 1.1925068509  |
| C  | 4.6168068716  | -2.4482796208 | 1.2907754050  |
| H  | 4.3696455000  | -3.4534653679 | 1.6456018363  |
| H  | 5.1029595604  | -2.5459463427 | 0.3153923710  |
| H  | 5.3425873851  | -2.0176862153 | 1.9879686504  |
| C  | 3.5303256328  | 0.2988384157  | 0.4402260645  |
| H  | 4.1947704370  | 0.8585015416  | 1.1058329256  |
| H  | 4.0479389990  | 0.1746608171  | -0.5177193186 |
| H  | 2.6295292555  | 0.9039738560  | 0.2852002121  |
| C  | 1.8401288651  | -2.1666425294 | -0.0180991103 |
| C  | 1.7552089840  | -1.7933707765 | -1.3676767169 |
| C  | 0.9045469965  | -3.1038295581 | 0.4504067652  |
| C  | 0.7687484519  | -2.3132350465 | -2.2112085033 |
| H  | 2.4539784693  | -1.0619342533 | -1.7691235484 |
| C  | -0.0749430369 | -3.6373536353 | -0.3837385138 |
| H  | 0.9296830640  | -3.4040836977 | 1.4957999652  |
| C  | -0.1542136887 | -3.2320694699 | -1.7173814850 |
| H  | 0.7216043517  | -2.0019259063 | -3.2506504929 |
| H  | -0.7782106641 | -4.3674347316 | 0.0077327820  |
| H  | -0.9234868322 | -3.6382268868 | -2.3682740532 |
| C  | 1.1032380402  | 3.1235669678  | 2.7954956320  |
| C  | 1.4594215003  | 1.7872987067  | 2.7292513599  |
| C  | 0.4797121774  | 0.7254926060  | 2.7588062483  |
| C  | -0.8882782654 | 1.1975470521  | 2.7844132617  |
| C  | -1.2155151184 | 2.5417937044  | 2.8431443336  |
| C  | -0.2340796351 | 3.5423445274  | 2.8475087447  |
| H  | 1.8970045241  | 3.8698576986  | 2.8109806273  |
| H  | 2.5136725764  | 1.5254023449  | 2.7205444808  |
| H  | -1.6854401947 | 0.4548311599  | 2.8440356162  |
| H  | -2.2668084832 | 2.8188747776  | 2.8989607844  |
| H  | -0.4964184284 | 4.5922828083  | 2.9095061556  |
| C  | 0.7888171405  | -0.6312949208 | 2.7411906706  |
| H  | -0.0258128487 | -1.3238955519 | 2.9526148217  |
| C  | 2.1916219928  | -1.1906314176 | 2.8531261864  |
| H  | 2.8289263859  | -0.5899704500 | 3.5240679795  |
| H  | 2.1607646219  | -2.1863194205 | 3.3175720473  |
| K  | -0.4454016596 | -0.1324139559 | 0.0632945914  |
| C  | 0.0231192597  | 2.8535266767  | -0.4905504781 |
| O  | 0.7495179103  | 1.8895867825  | -1.2854904711 |

---

|   |               |               |               |
|---|---------------|---------------|---------------|
| C | 1.9268318439  | 2.4998678152  | -1.8114557585 |
| C | 2.2231921538  | 3.6574881980  | -0.8676365140 |
| C | 0.8077796954  | 4.1618706918  | -0.5757846950 |
| H | -0.9973541119 | 2.9330692514  | -0.8850184861 |
| H | -0.0145687741 | 2.5019091955  | 0.5447194791  |
| H | 2.7146585133  | 1.7436433121  | -1.8512471767 |
| H | 1.7314242124  | 2.8636637519  | -2.8327414746 |
| H | 2.6768766044  | 3.2751424608  | 0.0534185115  |
| H | 2.8785061312  | 4.4118729504  | -1.3076384166 |
| H | 0.7265685081  | 4.7231994904  | 0.3562278298  |
| H | 0.4488063016  | 4.7854892717  | -1.4023959083 |
| C | -1.1110051305 | 0.7186376961  | -3.4062721947 |
| O | -1.7753912575 | 0.4216419894  | -2.1859967638 |
| C | -3.0498558322 | 1.0471296650  | -2.2590200064 |
| C | -2.8355756925 | 2.3638804232  | -3.0339160704 |
| C | -1.4419596822 | 2.1871138741  | -3.6805893283 |
| H | -0.0463777065 | 0.5312828595  | -3.2575723062 |
| H | -1.4977364882 | 0.0654214669  | -4.2041744306 |
| H | -3.7500906767 | 0.3896788881  | -2.7953694508 |
| H | -3.4109043632 | 1.1817540983  | -1.2361378160 |
| H | -3.6191547263 | 2.5079195902  | -3.7806574728 |
| H | -2.8551704334 | 3.2275405156  | -2.3659625243 |
| H | -1.4372222954 | 2.4219915688  | -4.7466805696 |
| H | -0.7023311692 | 2.8198519836  | -3.1840502542 |
| C | -2.8973517058 | -2.2147394187 | 1.4109136495  |
| O | -2.7600708273 | -1.3983686375 | 0.2397588597  |
| C | -3.4973819869 | -1.9576577471 | -0.8484309960 |
| C | -3.8024388302 | -3.3960781035 | -0.4444321087 |
| C | -3.9608186708 | -3.2602361602 | 1.0726095728  |
| H | -1.9262314269 | -2.6793901489 | 1.6260250550  |
| H | -3.1714185078 | -1.5756146747 | 2.2544755890  |
| H | -4.4252731107 | -1.3847736362 | -0.9867153507 |
| H | -2.8877816556 | -1.8651373770 | -1.7518291208 |
| H | -4.6905924347 | -3.7930094268 | -0.9399087509 |
| H | -2.9536617527 | -4.0436023298 | -0.6849831541 |
| H | -4.9585306929 | -2.8807699968 | 1.3135787921  |
| H | -3.8113596352 | -4.1969951403 | 1.6126690829  |

### TS3

M06-2X/6-31G(d,p) Electronic E: -2395.904311 a.u.

M06-2X/6-31G(d,p) Gibbs free E: -2395.309153 a.u.

M06-2X/cc-pVTZ Electronic E: -2396.505142 a.u.

---

|    |               |               |               |
|----|---------------|---------------|---------------|
| Si | 2.1526979694  | -0.9660685896 | 1.2674828523  |
| C  | 3.2149962902  | -2.5010729131 | 1.5599158569  |
| H  | 2.6054498572  | -3.3279674400 | 1.9381558556  |
| H  | 3.7077424701  | -2.8365809707 | 0.6426616735  |
| H  | 3.9894199708  | -2.2934053231 | 2.3055190032  |
| C  | 3.2644201171  | 0.3572524432  | 0.5016982026  |
| H  | 3.9287875623  | 0.7717574306  | 1.2664947581  |
| H  | 3.8944593147  | -0.0614736436 | -0.2899243423 |
| H  | 2.6920758952  | 1.1894189357  | 0.0801424575  |
| C  | 0.8703179368  | -1.4642127730 | -0.0372052753 |
| C  | 0.9712764297  | -1.0503821720 | -1.3745924222 |
| C  | -0.1812840179 | -2.3370801230 | 0.2924935955  |
| C  | 0.0646228315  | -1.4817507220 | -2.3446634923 |
| H  | 1.7804840849  | -0.3842460239 | -1.6681821964 |
| C  | -1.0931727812 | -2.7714869950 | -0.6700354301 |
| H  | -0.2889635117 | -2.6755511970 | 1.3210847260  |
| C  | -0.9763618463 | -2.3398039630 | -1.9918897015 |
| H  | 0.1748954417  | -1.1571412319 | -3.3756964320 |
| H  | -1.8975791678 | -3.4461422111 | -0.3929224526 |
| H  | -1.6880486692 | -2.6746598838 | -2.7411291141 |
| C  | -0.6774594733 | 2.8738185343  | 0.9348788387  |
| C  | -0.0205989745 | 1.8385113263  | 1.5914969957  |
| C  | -0.7325967968 | 0.8733862331  | 2.3864142379  |
| C  | -2.1515119059 | 1.1064459805  | 2.4918830176  |
| C  | -2.7805478289 | 2.1373274158  | 1.8240127137  |
| C  | -2.0662733577 | 3.0279131651  | 0.9962737143  |
| H  | -0.0867982945 | 3.5872141930  | 0.3633545597  |
| H  | 1.0634237808  | 1.7915541497  | 1.5521184880  |
| H  | -2.7202030849 | 0.4684327985  | 3.1612979986  |
| H  | -3.8533733724 | 2.2676133192  | 1.9526160652  |
| H  | -2.5639918247 | 3.8470907005  | 0.4899694676  |
| C  | -0.0973851850 | -0.1814588490 | 3.0547584715  |
| H  | -0.7184205299 | -0.9509218438 | 3.5051070087  |
| C  | 1.3777539478  | -0.4488032061 | 2.9258877441  |
| H  | 1.9431296702  | 0.4372932746  | 3.2613070467  |
| H  | 1.6587048228  | -1.2352445499 | 3.6379452999  |
| K  | -1.7415136919 | 0.2877253055  | -0.3849107109 |
| C  | -0.1988458705 | 0.9766528858  | 5.1130497190  |
| O  | -1.3062466483 | 0.7401188823  | 5.4504493851  |
| O  | 0.8948542036  | 1.4179354425  | 5.1686820970  |
| C  | -3.6030563834 | -1.8159129310 | 1.7374304640  |

---

|   |               |               |               |
|---|---------------|---------------|---------------|
| O | -3.7507811987 | -1.2524374826 | 0.4269918249  |
| C | -4.6241414307 | -2.0547061847 | -0.3650910901 |
| C | -5.2313702720 | -3.0869357169 | 0.5858824406  |
| C | -4.1217472881 | -3.2462158705 | 1.6287911007  |
| H | -2.5493250000 | -1.7374828578 | 2.0269282426  |
| H | -4.2013754301 | -1.2324331161 | 2.4475853014  |
| H | -5.3731932102 | -1.4067317307 | -0.8337843274 |
| H | -4.0397969496 | -2.5303618593 | -1.1657223429 |
| H | -6.1322805433 | -2.6833346497 | 1.0581998349  |
| H | -5.4965640587 | -4.0178462528 | 0.0810442443  |
| H | -4.4769039602 | -3.6342438753 | 2.5850503510  |
| H | -3.3387723127 | -3.9165480427 | 1.2593927452  |
| C | -4.3651514436 | 1.1612485075  | -1.7264783470 |
| O | -3.6435533424 | 0.0571223632  | -2.2974316784 |
| C | -4.3096534842 | -0.4184245765 | -3.4627650414 |
| C | -5.2837901773 | 0.6860016947  | -3.8643155072 |
| C | -5.6828883702 | 1.2444280969  | -2.4962779281 |
| H | -4.5020480422 | 0.9687282417  | -0.6557781681 |
| H | -3.7589448487 | 2.0693468270  | -1.8488342738 |
| H | -3.5583971183 | -0.6394006690 | -4.2272994220 |
| H | -4.8468631505 | -1.3479683841 | -3.2239866926 |
| H | -4.7685507925 | 1.4529296816  | -4.4518049329 |
| H | -6.1271503772 | 0.3133743786  | -4.4486010410 |
| H | -6.0790281784 | 2.2603750439  | -2.5371152484 |
| H | -6.4381097128 | 0.6009994855  | -2.0328931645 |
| C | -1.4087317293 | 1.4760640724  | -3.8456796350 |
| O | -1.0750913542 | 1.7400584485  | -2.4827689150 |
| C | 0.2253392002  | 2.3288655824  | -2.3935444490 |
| C | 0.9048299483  | 2.0043808998  | -3.7185808051 |
| C | -0.2801740841 | 2.0784905223  | -4.6855359007 |
| H | -1.4810609958 | 0.3896657450  | -3.9812530396 |
| H | -2.3895541767 | 1.9135165184  | -4.0621810098 |
| H | 0.1253380594  | 3.4129547693  | -2.2514587868 |
| H | 0.7295880127  | 1.9091290644  | -1.5165809296 |
| H | 1.7113064032  | 2.6982160835  | -3.9621900749 |
| H | 1.3165034124  | 0.9894227324  | -3.6949460596 |
| H | -0.4995183755 | 3.1227006760  | -4.9284534529 |
| H | -0.1183000081 | 1.5365059731  | -5.6192635660 |

## VII

M06-2X/6-31G(d,p) Electronic E: -2395.927671 a.u.

M06-2X/6-31G(d,p) Gibbs free E: -2395.329021 a.u.

---

M06-2X/cc-pVTZ Electronic E: -2396.545105 a.u.

|    |               |               |               |
|----|---------------|---------------|---------------|
| Si | 3.3848932242  | -0.9472556171 | 1.4129025127  |
| C  | 4.3008845769  | -2.5088282328 | 1.9350655165  |
| H  | 3.6029790542  | -3.2594771841 | 2.3186990290  |
| H  | 4.8553395834  | -2.9526793492 | 1.1032697880  |
| H  | 5.0097739597  | -2.2820432019 | 2.7375573294  |
| C  | 4.6501499526  | 0.2422021803  | 0.6664152543  |
| H  | 5.2955644109  | 0.6392250599  | 1.4561225098  |
| H  | 5.2916740731  | -0.2791653256 | -0.0515409143 |
| H  | 4.1976952333  | 1.0963455509  | 0.1526834246  |
| C  | 2.2098913043  | -1.4709129091 | 0.0083125704  |
| C  | 2.3604551592  | -1.0112525126 | -1.3099285870 |
| C  | 1.1819568715  | -2.4000165723 | 0.2513794075  |
| C  | 1.5194664687  | -1.4459131385 | -2.3373764937 |
| H  | 3.1590623036  | -0.3108573327 | -1.5461119256 |
| C  | 0.3335271569  | -2.8361667183 | -0.7651236571 |
| H  | 1.0409161117  | -2.7946597927 | 1.2556698334  |
| C  | 0.4967459483  | -2.3538329785 | -2.0655168826 |
| H  | 1.6659027899  | -1.0824140140 | -3.3506289898 |
| H  | -0.4528902467 | -3.5521342827 | -0.5425878275 |
| H  | -0.1601491203 | -2.6929395486 | -2.8615584940 |
| C  | 1.0239878437  | 3.0972315466  | 0.5785500400  |
| C  | 1.4411002788  | 2.0058077756  | 1.3460331153  |
| C  | 0.5357077294  | 1.2535900508  | 2.1080465407  |
| C  | -0.8089279451 | 1.6811126335  | 2.1183443508  |
| C  | -1.2243792395 | 2.7644070326  | 1.3494242509  |
| C  | -0.3162099598 | 3.4698474261  | 0.5536299458  |
| H  | 1.7570687612  | 3.6615040349  | 0.0088419021  |
| H  | 2.4947154632  | 1.7507338191  | 1.3592885766  |
| H  | -1.4967049418 | 1.1485912138  | 2.7685662525  |
| H  | -2.2664641320 | 3.0710301660  | 1.3817702035  |
| H  | -0.6435775557 | 4.3132742023  | -0.0463235275 |
| C  | 0.9473218857  | -0.0024621001 | 2.8476905899  |
| H  | 0.4506365239  | -0.8385739228 | 2.3295295110  |
| C  | 2.4587403249  | -0.2517314612 | 2.9067220628  |
| H  | 2.9591470202  | 0.6588149338  | 3.2602159764  |
| H  | 2.6096127679  | -0.9583172979 | 3.7305427540  |
| K  | -0.4160488472 | 0.2790320325  | -0.5251627053 |
| C  | 0.2930585869  | -0.0506027304 | 4.3060073249  |
| O  | -0.9519385613 | -0.2218149455 | 4.2873169261  |
| O  | 1.0777013395  | 0.0677531521  | 5.2488587959  |

---

|   |               |               |               |
|---|---------------|---------------|---------------|
| C | -2.5938922504 | -1.5315179641 | 1.9683136137  |
| O | -2.3163319582 | -1.1451640979 | 0.6113517349  |
| C | -3.0084533188 | -2.0567866784 | -0.2364876065 |
| C | -3.1915108481 | -3.3631236021 | 0.5704753309  |
| C | -2.5105369773 | -3.0494724118 | 1.9137807063  |
| H | -1.8794394820 | -1.0548475378 | 2.6495027298  |
| H | -3.6125700137 | -1.2076086733 | 2.2312337221  |
| H | -3.9788062318 | -1.6250439384 | -0.5271498749 |
| H | -2.4127782565 | -2.1857005170 | -1.1455859164 |
| H | -4.2536709160 | -3.5749773686 | 0.7169123645  |
| H | -2.7528273191 | -4.2268715858 | 0.0643489846  |
| H | -2.9928206711 | -3.5329809151 | 2.7645070522  |
| H | -1.4579812961 | -3.3513411610 | 1.9007545488  |
| C | -3.2693203799 | 1.1778049538  | -1.5023761459 |
| O | -2.4727778226 | 0.2133462122  | -2.2148508065 |
| C | -3.2145018518 | -0.3251207465 | -3.3060716973 |
| C | -4.3210546915 | 0.6869702214  | -3.5789486478 |
| C | -4.6511599658 | 1.1505452775  | -2.1580729859 |
| H | -3.2892836985 | 0.8966065827  | -0.4434145354 |
| H | -2.7875687076 | 2.1592716935  | -1.6057851469 |
| H | -2.5300732369 | -0.4711407897 | -4.1468904366 |
| H | -3.6350534556 | -1.3003847921 | -3.0216260179 |
| H | -3.9318097133 | 1.5213901742  | -4.1720487460 |
| H | -5.1724464910 | 0.2533126084  | -4.1063733194 |
| H | -5.1497876322 | 2.1202936033  | -2.1191940604 |
| H | -5.2931854685 | 0.4154689944  | -1.6626943146 |
| C | -0.2069367331 | 1.3634732121  | -3.9622168622 |
| O | 0.2685479778  | 1.6777711949  | -2.6504006479 |
| C | 1.5453457290  | 2.3165171386  | -2.7239493862 |
| C | 2.0797996583  | 1.9961561846  | -4.1149918048 |
| C | 0.7881272390  | 1.9956053749  | -4.9370044396 |
| H | -0.2382052405 | 0.2703046605  | -4.0669488985 |
| H | -1.2267516968 | 1.7460611903  | -4.0686545386 |
| H | 1.4186544275  | 3.3983563143  | -2.5834911045 |
| H | 2.1668206174  | 1.9308323421  | -1.9094609728 |
| H | 2.8172197268  | 2.7220789040  | -4.4617549199 |
| H | 2.5427715952  | 1.0035095064  | -4.1242630830 |
| H | 0.4930045100  | 3.0231761573  | -5.1701463529 |
| H | 0.8662386857  | 1.4411976365  | -5.8739568090 |

---

## 7. References

- [1] C. Kleeberg and C. Borner, On the Reactivity of Silylboranes toward Lewis Bases: Heterolytic B–Si Cleavage vs. Adduct Formation, *Eur. J. Inorg. Chem.*, **2013**, 2799–2806.
- [2] L. Gao, X. Liang, L. He, G. Li, S. Chen, J. Cao, J. Ma, G. Wang and S. Li, Base-mediated C–B bond activation of benzylic boronate for the rapid construction of  $\beta$ -silyl/boryl functionalized 1,1-diarylalkanes from aromatic alkenes, *Chem. Sci.*, 2023, **14**, 11881–11889.
- [3] F. Jensen, Segmented Contracted Basis Sets Optimized for Nuclear Magnetic Shielding, *J. Chem. Theory Comput.*, 2015, **11**, 132–138.
- [4] W. Xie, S. Park, H. Jung, D. Kim, M. Baik, and S. Chang, Conjugate Addition of Perfluoroarenes to  $\alpha,\beta$ -Unsaturated Carbonyls Enabled by an Alkoxide-Hydrosilane System: Implication of a Radical Pathway, *J. Am. Chem. Soc.* **2018**, 140, 9659–9668.
- [5] Full citation of Gaussian 16, Revision A.03, M. J. Frisch, G. W. Trucks, H. B. Schlegel, G. E. Scuseria, M. A. Robb, J. R. Cheeseman, G. Scalmani, V. Barone, G. A. Petersson, H. Nakatsuji, X. Li, M. Caricato, A. V. Marenich, J. Bloino, B. G. Janesko, R. Gomperts, B. Mennucci, H. P. Hratchian, J. V. Ortiz, A. F. Izmaylov, J. L. Sonnenberg, D. Williams-Young, F. Ding, F. Lipparini, F. Egidi, J. Goings, B. Peng, A. Petrone, T. Henderson, D. Ranasinghe, V. G. Zakrzewski, J. Gao, N. Rega, G. Zheng, W. Liang, M. Hada, M. Ehara, K. Toyota, R. Fukuda, J. Hasegawa, M. Ishida, T. Nakajima, Y. Honda, O. Kitao, H. Nakai, T. Vreven, K. Throssell, J. A. Montgomery, Jr., J. E. Peralta, F. Ogliaro, M. J. Bearpark, J. J. Heyd, E. N. Brothers, K. N. Kudin, V. N. Staroverov, T. A. Keith, R. Kobayashi, J. Normand, K. Raghavachari, A. P. Rendell, J. C. Burant, S. S. Iyengar, J. Tomasi, M. Cossi, J. M. Millam, M. Klene, C. Adamo, R. Cammi, J. W. Ochterski, R. L. Martin, K. Morokuma, O. Farkas, J. B. Foresman and Fox, D. J. Gaussian, Inc., Wallingford CT, **2016**.
- [6] C. Y. Legault, CYLview, version 1.0b; Université de Sherbrooke: Quebec, Canada, **2009**; <http://www.cylview.org>.
- [7] a) Y. Zhao, N. E. Schultz, D. G. Truhlar, *J. Chem. Theory. Comput.* **2006**, 2, 364–382; b) Y. Zhao, D. G. Truhlar, *J. Chem. Phys.* **2006**, 125, 194101; c) Y. Zhao, D. G. Truhlar, *J. Phys. Chem. A.* **2006**, 110, 13126–13130; d) Y. Zhao, D. G. Truhlar, *Theor. Chem. Acc.* **2008**, 120, 215–241; e) Y. Zhao, D. G. Truhlar, *Acc. Chem. Res.* **2008**, 41, 157–167.
- [8] J. Tomasi, M. Persico, *Chem. Rev.* **1994**, 94, 2027–2094.
- [9] a) C. Unkelbach, D. F. O'Shea and C. Strohmann, Insights into the Metalation of Benzene and Toluene by Schlossers Base: A Superbasic Cluster Comprising PhK, PhLi, and *t*BuOLi, *Angew. Chem. Int. Ed.* **2014**, 53, 553–556; b) L. Brieger, C. Unkelbach and C. Strohmann, THF-solvated Heavy Alkali Metal Benzyl Compounds (Na, Rb, Cs): Defined Deprotonation Reagents for Alkali Metal Mediation Chemistry, *Chem. Eur. J.* **2021**, 27, 17780–17784.
